# Supplementary material for: Adsorption of trace metals and complexing ligands at the oxide/water interface
Source: Springer Nature journal article supplement (doi:10.1038/s41598-019-42530-1), 1977-01-01
Supplement: MOESM5 [file 41598_2019_42530_MOESM5_ESM.zip]

## Sheet: CA_hits_annotated.tsv
Gene	Yeast	Hyphae	Description	Protein_IDs	fname	CGDID
HAM1		+	Putative deoxyribonucleoside triphosphate pyrophosphohydrolase; caspofungin repressed; regulated by Gcn2p and Gcn4p	orf19.1108	C5_03860W_A	CAL0000174774
MSB1		+	Putative regulator of transcription; expression in S. cerevisiae flo8 and flo11 mutants suggests a role in regulation of adhesion factors	orf19.1133	C1_03710C_A	CAL0000199709
DBF2	+		Essential serine/threonine protein kinase involved in mitotic spindle formation and cytokinesis; required for septum formation, exit from mitosis, and normal hyphal morphogenesis	orf19.1223	C2_06670C_A	CAL0000197161
FCY21	+		High affinity, high capacity, hypoxanthine-adenine-guanine-cytosine/H+ symporter	orf19.1357	C2_09950W_A	CAL0000195436
DUO1	+	+	Subunit of the Dam1 (DASH) complex, which acts in chromosome segregation by coupling kinetochores to spindle microtubules	orf19.1428	C4_04220W_A	CAL0000184353
CLB2	+		B-type mitotic cyclin (cyclin-dependent protein kinase regulatory subunit); essential; required for wild-type mitotic exit; role in cell polarization; interacts with catalytic subunit Cdk1	orf19.1446	C2_01410C_A	CAL0000189817
SRB9	+		Subunit of the RNA polymerase II mediator complex; transposon mutation affects filamentous growth	orf19.1451	C2_01470W_A	CAL0000184111
YAK1	+		Predicted serine-threonine protein kinase; involved in hyphal growth regulation and biofilm formation	orf19.147	C2_04660C_A	CAL0000193813
CHT4	+	+	Chitinase; similar to S. cerevisiae sporulation-specific Cts2p	orf19.1515	C2_02010C_A	CAL0000185677
ERG7	+			orf19.1570	C2_02460W_A	CAL0000184383
ERG24	+			orf19.1598	C2_09400C_A	CAL0000185086
KRI1		+	Essential nucleolar protein required for 40S ribosome biogenesis; associate with snR30; physically and functionally interacts with Krr1p	orf19.1609	C3_02350W_A	CAL0000194501
GFA1	+		Glucosamine-6-phosphate synthase, homotetrameric enzyme of chitin/hexosamine biosynthesis	orf19.1618	C3_02280C_A	CAL0000176261
ERG6	+			orf19.1631	C3_02150C_A	CAL0000189580
CDC16	+		Subunit of the anaphase-promoting complex/cyclosome (APC/C); which is a ubiquitin-protein ligase required for degradation of anaphase inhibitors, including mitotic cyclins, during the metaphase/anaphase transition; required for sporulation; relocalizes to the cytosol in response to hypoxia	orf19.1792	C4_05340W_A	CAL0000200502
CBR1	+		Putative cytochrome B5 reductase; plasma membrane-localized	orf19.1801	C4_05450C_A	CAL0000182794
NUF2	+		Kinetochore component; amount of Nuf2p and Mtw1p protein detected at each centromere is consistent with a single kinetochore microtubule attachment site	orf19.1941	C5_01280C_A	CAL0000176285
CDH1	+	+	Protein involved in regulation of mitosis; similar to S. cerevisiae Cdh1, which is an APC/C component; transcriptionally induced by Mnl1 under weak acid stress	orf19.2084	C2_00450C_A	CAL0000182223
ORC5	+			orf19.2369	CR_06960W_A	CAL0000191350
	+	+	Protein of unknown function; possibly an essential gene, disruptants not obtained by UAU1 method; no domains	orf19.2381	CR_03410W_A	CAL0000192404
SLD2	+		Single-stranded DNA origin-binding and annealing protein; required for initiation of DNA replication; phosphorylated in S phase by cyclin-dependent kinases (Cdks), promoting origin binding, DNA replication and Dpb11p complex formation; component of the preloading complex; binds the Mcm2-7p complex to prevent inappropriate Mcm2-7p interaction with the GINS complex in G1; required for S phase check…	orf19.2389	CR_03340C_A	CAL0000193696
TNA1	+		High affinity nicotinic acid plasma membrane permease; responsible for uptake of low levels of nicotinic acid; expression of the gene increases in the absence of extracellular nicotinic acid or para-aminobenzoate (PABA)	orf19.2397	CR_03270W_A	CAL0000181841
SQS1	+		Protein that stimulates the ATPase and helicase activities of Prp43p; acts with Prp43p to stimulate 18s rRNA maturation by Nob1p; overexpression antagonizes the suppression of splicing defects by spp382 mutants; component of pre-ribosomal particles; relocalizes from nucleus to nucleolus upon DNA replication stress	orf19.2400	CR_03230W_A	CAL0000180348
MLC1	+		Microtubule-dependent localized protein; at Spitzenkorper and cytokinetic ring in hyphae; cell-cycle dependent localization to tip polarisome, bud neck in yeast and pseudohyphae	orf19.2416.1	CR_03090C_A	CAL0000194357
NET1	+	+	Core subunit of the RENT complex; involved in nucleolar silencing and telophase exit; stimulates transcription by RNA polymerase I and regulates nucleolar structure	orf19.267	C3_02760C_A	CAL0000201102
NCP1	+		NADPH-cytochrome P450 reductase, acts with Erg11p in sterol 14 alpha-demethylation in ergosterol biosynthesis	orf19.2672	C4_03180W_A	CAL0000197218
SLK19	+	+	SMC_N Superfamily domain involved in Chromosome segregation ATPase [Cell cycle control, cell division, chromosome partitioning]	orf19.2684	C4_03080W_A	CAL0000198210
FAA21	+		Predicted acyl CoA synthetase; upregulated upon phagocytosis; transcript regulated by Nrg1 and Mig1	orf19.272	C3_02810C_A	CAL0000178021
	+	+	No domains	orf19.2826	CR_02670C_A	CAL0000174114
NDC80	+	+	Component of the kinetochore-associated Ndc80 complex; conserved coiled-coil protein involved in chromosome segregation, spindle checkpoint activity, and kinetochore assembly and clustering; evolutionarily conserved; complex members include Ndc80p, Nuf2p, Scp24p, and Spc25p; modified by sumoylation	orf19.2827	CR_02680W_A	CAL0000189198
ERG26	+			orf19.2909	C4_06270C_A	CAL0000199131
ORC1	+	+		orf19.3000	C1_03070C_A	CAL0000190220
EHT1	+		Putative acyl-coenzymeA:ethanol O-acyltransferase; regulated by Sef1, Sfu1, and Hap43	orf19.3040	C1_03390W_A	CAL0000191944
	+		No domains	orf19.3091	C4_07130W_A	CAL0000186026
CPA2	+		Putative arginine-specific carbamoylphosphate synthetase	orf19.3221	CR_01330W_A	CAL0000195469
CDC27	+		Putative ubiquitin-protein ligase; periodic mRNA expression, peak at cell-cycle S/G2 phase; Subunit of the Anaphase-Promoting Complex/Cyclosome (APC/C)	orf19.3231	CR_01230C_A	CAL0000197700
ERG27	+			orf19.3240	CR_01140C_A	CAL0000174882
DAL81	+		Zn(II)2Cys6 transcription factor; ortholog of S. cerevisiae Dal81, involved in the regulation of nitrogen-degradation genes; required for yeast cell adherence to silicone substrate	orf19.3252	CR_01030W_A	CAL0000195779
ORC6	+			orf19.3289	C1_01000C_A	CAL0000183337
	+		No domains	orf19.3296	C1_01080W_A	CAL0000180524
IFD3	+		Putative aldo/keto reductase; Mig1-regulated	orf19.3311	C1_01240W_A	CAL0000176253
ESP1	+		Putative caspase-like cysteine protease; mutation confers increased sensitivity to nocodazole; periodic mRNA expression, peak at cell-cycle S/G2 phase; mRNA binds She3; Separase, a caspase-like cysteine protease; promotes sister chromatid separation by mediating dissociation of the cohesin Scc1p from chromatin; inhibits protein phosphatase 2A-Cdc55p to promote mitotic exit	orf19.3356	C1_01670C_A	CAL0000192671
	+		Has domain(s) with predicted flavin adenine dinucleotide binding, oxidoreductase activity and role in oxidation-reduction process	orf19.3362	C4_03350C_A	CAL0000191273
	+		Has domain(s) with predicted flavin adenine dinucleotide binding, oxidoreductase activity and role in oxidation-reduction process	orf19.2671	C4_03190W_A	CAL0000199070
IPL1		+	Putative Aurora kinase; Hap43-induced	orf19.3474	C6_02320C_A	CAL0000183313
PUS1	+		Putative pseudouridine synthase; predicted role in snRNA pseudouridine synthesis, tRNA pseudouridine synthesis	orf19.3477	C6_02350C_A	CAL0000183350
MCR1	+		NADH-cytochrome-b5 reductase; soluble in hyphae	orf19.3507	C6_02040W_A	CAL0000182452
CSI2	+		Protein of unknown function; green fluorescent protein (GFP)- fusion protein localizes to the mother side of the bud neck and the vacuole	orf19.3535	C2_05040C_A	CAL0000184249
DAD2	+	+	Essential subunit of the Dam1 (DASH) complex, which acts in chromosome segregation by coupling kinetochores to spindle microtubules	orf19.3551	C2_05210W_A	CAL0000174462
CDC7	+	+	Catalytic subunit of Dbf4p-regulated serine/threonine protein kinase; negative regulator of hyphal development; cell-cycle regulated periodic mRNA expression	orf19.3561	C2_05320W_A	CAL0000191207
SPS19	+		Putative oxidoreductase	orf19.3684	C1_02270C_A	CAL0000180860
YHB1	+		Nitric oxide dioxygenase; acts in nitric oxide scavenging/detoxification; role in virulence in mouse; transcript activated by NO, macrophage interaction; Hap43, hypha repressed; mRNA binds She3	orf19.3707	CR_07790C_A	CAL0000179202
IDP2	+		Isocitrate dehydrogenase; white-opaque switch regulated; morphology-regulation by Ssn6; protein in exponential and stationary phase yeast; Hap43-repressed; Spider biofilm repressed by Bcr1, Tec1, Ndt80, Rob1, Brg1; Spider biofilm induced	orf19.3733	CR_02360W_A	CAL0000198913
SPC34	+	+	Subunit of the Dam1 (DASH) complex, which acts in chromosome segregation by coupling kinetochores to spindle microtubules	orf19.3788	C4_04910C_A	CAL0000192348
BAS1	+		Putative Myb-like transcription factor; ortholog S. cerevisiae Bas1, a regulator of purine biosynthetic genes; mutant exhibits adenine auxotrophy and abnormal colony morphology	orf19.3809	C4_04730W_A	CAL0000179712
ZDS1	+		Protein with a role in regulating Swe1p-dependent polarized growth; involved in maintaining Cdc55p in the cytoplasm where it promotes mitotic entry; involved in mitotic exit through Cdc14p regulation; interacts with silencing proteins at telomeres; has a role in Bcy1p localization; implicated in mRNA nuclear export	orf19.3823	C4_04580W_A	CAL0000179137
YPL247C	+		Putative protein of unknown function; green fluorescent protein (GFP)-fusion protein localizes to the cytoplasm and nucleus; similar to the petunia WD repeat protein an11; overexpression causes a cell cycle delay or arrest	orf19.384	C1_08390C_A	CAL0000189537
CDC28	+		Cyclin-dependent protein kinase; interacts with regulatory subunit Cyb1; determination of cell morphology during the cell cycle	orf19.3856	CR_06050W_A	CAL0000191263
DAD3	+		Subunit of the Dam1 (DASH) complex, which acts in chromosome segregation by coupling kinetochores to spindle microtubules	orf19.3871	CR_06160C_A	CAL0000201809
PSD2	+		Ortholog(s) have phosphatidylserine decarboxylase activity, role in phosphatidylcholine biosynthetic process and cell division site, cytosol, endosome localization	orf19.3954	C5_04680W_A	CAL0000195449
YHR045W	+		Putative protein of unknown function; possible role in iron metabolism and/or amino acid and carbohydrate metabolism; green fluorescent protein (GFP)-fusion protein localizes to the endoplasmic reticulum	orf19.4013	C5_05200C_A	CAL0000179668
SLM1	+		Phosphoinositide PI4,5P(2) binding protein, forms a complex with Slm2p; acts downstream of Mss4p in a pathway regulating actin cytoskeleton organization in response to stress; TORC2 complex substrate and effector; protein abundance increases in response to DNA replication stress; SLM1 has a paralog, SLM2, that arose from the whole genome duplication	orf19.4043	C5_05440C_A	CAL0000199819
ERG1	+			orf19.406	C1_08590C_A	CAL0000179458
	+		No domains	orf19.4101	C2_06160W_A	CAL0000198199
RAD52	+	+	Required for homologous DNA recombination, repair of UV- or MMS-damaged DNA, telomere length, UV-induced LOH; constitutive expression, MMS-induced; weakly complements S. cerevisiae rad52 mutant	orf19.4208	C6_00510C_A	CAL0000180590
ORC4	+	+		orf19.4221	C5_02150C_A	CAL0000191715
RIF1	+	+	Ortholog(s) have telomeric DNA binding activity, role in DNA double-strand break processing, DNA replication initiation, chromatin silencing at silent mating-type cassette, telomere capping and shelterin complex localization	orf19.427	C1_05380C_A	CAL0000184448
RAD9	+	+	DNA damage-dependent checkpoint protein; involved in regulation of DNA-damage-induced filamentous growth	orf19.4275	C5_02610C_A	CAL0000186283
YNK1	+		Nucleoside diphosphate kinase (NDP kinase)	orf19.4311	C5_02890W_A	CAL0000191707
STU1	+	+	Ortholog(s) have structural constituent of cytoskeleton activity, role in microtubule nucleation and spindle pole body localization	orf19.4435	C1_07360W_A	CAL0000197796
SPC19	+	+	Essential subunit of the Dam1 (DASH) complex, which acts in chromosome segregation by coupling kinetochores to spindle microtubules	orf19.4473	C1_03980W_A	CAL0000196840
ASK1	+	+	Essential subunit of the Dam1 (DASH) complex, which acts in chromosome segregation by coupling kinetochores to spindle microtubules	orf19.4675	C4_01150W_A	CAL0000194135
GDH3	+		NADP-glutamate dehydrogenase; Nrg1, Plc1 regulated	orf19.4716	C4_06120W_A	CAL0000180438
DAK2	+		Putative dihydroxyacetone kinase; repressed by yeast-hypha switch	orf19.4777	C1_09190C_A	CAL0000174642
DAM1	+	+	Essential subunit of the Dam1 (DASH) complex, which acts in chromosome segregation by coupling kinetochores to spindle microtubules	orf19.4837	C1_09730W_A	CAL0000195338
SAE2	+	+	S. cerevisiae ortholog Sae2 is an endonuclease that processes hairpin DNA structures with the MRX complex, involved in meiotic and mitotic double-strand break repair; upregulated in a cyr1 null mutant	orf19.4988	C1_13560W_A	CAL0000187046
DBF4	+	+		orf19.5166	C7_02950C_A	CAL0000174858
	+		No domains	orf19.520	CR_04330W_A	CAL0000177223
	+		No domains	orf19.5246	C1_12180C_A	CAL0000178396
THP1	+		Putative nuclear pore-associated protein; Hap43p-induced gene; induced upon low-level peroxide stress; possibly an essential gene, disruptants not obtained by UAU1 method	orf19.5276	C1_11910W_A	CAL0000198679
ORC2	+	+		orf19.5358	C2_10760C_A	CAL0000181235
FKH2	+	+	Forkhead transcription factor; morphogenesis regulator; required for wild-type hyphal transcription, cell separation, and for virulence in cell culture	orf19.5389	C3_00670C_A	CAL0000195461
RHR2	+		Glycerol 3-phosphatase; roles in osmotic tolerance, glycerol accumulation in response to salt; Spider/flow model biofilm induced; regulated by macrophage, stress, yeast-hyphal switch, pheromone, Gcn4, Hog1, Nrg1, Tup1	orf19.5437	C3_00320W_A	CAL0000177047
	+	+	ADIP domain Afadin- and alpha -actinin-Binding; This family is found in mammals where it is localized at cell-cell adherens junctions, and in Sch. pombe and other fungi where it anchors spindle-pole bodies to spindle microtubules. It is a coiled-coil structure, and in pombe, it is required for anchoring the minus end of spindle microtubules to the centrosome equivalent, the spindle-pole body	orf19.5491	C2_06280C_A	CAL0000191185
	+	+	No domains	orf19.5518	C6_02490C_A	CAL0000188828
	+		No domains	orf19.557	CR_05210W_A	CAL0000198539
RNH1		+	Putative ribonuclease H1	orf19.5614	C6_03260W_A	CAL0000187941
RTC4	+		Protein of unknown function; mutants are viable	orf19.580	C5_00780C_A	CAL0000184552
NCB2		+	Beta subunit of NC2, heterodimeric regulator of transcription; activates CDR1 transcription	orf19.5825	C2_02810C_A	CAL0000180502
CDC5	+	+	Polo-like kinase; member of conserved Mcm1 regulon; depletion causes defects in spindle elongation and Cdc35-dependent filamentation	orf19.6010	C1_00950C_A	CAL0000177027
SIN3	+		Protein similar to S. cerevisiae Sin3p (transcriptional corepressor involved in histone deacetylase recruitment); has paired amphipathic helix PAH1 domain; interacts with ScOpi1p, not CaOpi1p; transposon mutation affects filamentous growth	orf19.6011	C1_00930C_A	CAL0000177059
ERG2	+			orf19.6026	C1_00800C_A	CAL0000177093
	+		No domains	orf19.6030	C1_00760W_A	CAL0000195596
SLI15	+	+	Subunit of the conserved chromosomal passenger complex (CPC); complex regulates kinetochore-microtubule attachments, activation of the spindle tension checkpoint, and mitotic spindle disassembly; other complex members are Ipl1p, Bir1p, and Nbl1p	orf19.6049	C1_00570C_A	CAL0000191339
ACE2	+	+	Transcription factor; similar to S. cerevisiae Ace2 and Swi5; regulates morphogenesis, cell separation, adherence, virulence in a mice; mutant is hyperfilamentous	orf19.6124	CR_07440W_A	CAL0000191878
CDC9	+		DNA ligase I found in nucleus and mitochondria; essential enzyme that joins Okazaki fragments during DNA replication; also acts in ribonucleotide excision repair, base excision repair, and recombination; DNA ligase I mutants trigger ubiquitination of PCNA at K107, facilitating Rad59p-mediated bypass of unligated Okazaki fragments; human homolog LIG1 can complement yeast cdc9 temperature-sensitive…	orf19.6155	C3_00830C_A	CAL0000199743
IPI3		+	Putative U2 snRNP component	orf19.6234	C1_06760C_A	CAL0000201524
ANT1	+		Peroxisomal adenine nucleotide transporter; role in beta-oxidation of medium-chain fatty acid and peroxisome proliferation;	orf19.6254	C1_06570W_A	CAL0000199020
GLT1	+		Putative glutamate synthase; regulated by Sef1, Sfu1, and Hap43	orf19.6257	C1_06550W_A	CAL0000182870
FUN30	+		Ortholog(s) have DNA binding, DNA-dependent ATPase activity, chromatin binding activity	orf19.6291	CR_07600W_A	CAL0000192125
FDH1	+		Formate dehydrogenase; oxidizes formate to CO2; Mig1 regulated; induced by macrophages; fluconazole-repressed; repressed by Efg1 in yeast, not hyphal conditions	orf19.638	CR_05170C_A	CAL0000180074
ACO1	+		Aconitase; induced in high iron; 2 upstream CCAAT motifs; amino acid starvation (3-AT), amphotericin B, phagocytosis, farnesol induced; Hap43, fluconazole-repressed; Gcn4-regulated	orf19.6385	CR_08210C_A	CAL0000182282
YDJ1		+	Putative DnaJ-like heat shock/chaperone	orf19.6408	CR_08420W_A	CAL0000183386
BIR1		+	Subunit of chromosomal passenger complex (CPC); CPC is comprised of Ipl1p-Sli15p-Bir1p-Nbl1p and regulates chromosome segregation; required for chromosome bi-orientation and for spindle assembly checkpoint activation upon reduced sister kinetochore tension; relative distribution to shortened microtubules increases upon DNA replication stress; sumoylated in an Mms21p-dependent manner; human surviv…	orf19.643	CR_05100W_A	CAL0000178244
DCI1	+		Protein with an enoyl-CoA hydratase related domain	orf19.6443	CR_08670C_A	CAL0000200153
TRS33	+		Putative TRAPP complex subunit; constitutive expression independent of MTL or white-opaque status	orf19.6496	C7_02180C_A	CAL0000186589
YEN1	+	+	Holliday junction resolvase; promotes template switching during break-induced replication (BIR), causing non-reciprocal translocations (NRTs); localization is cell-cycle dependent and regulated by Cdc28p phosphorylation; homolog of human GEN1; similar to S. cerevisiae endonuclease Rth1p	orf19.652	CR_05010W_A	CAL0000183527
IQG1	+		Actomyosin ring component at bud neck; cell-cycle regulated ser phosphorylation at CDK sites regulate association with Bni1/Bnr1, Iqg1 degradation, and ring disassembly; mutation causes cytokinetic defects	orf19.6536	C7_01840W_A	CAL0000175167
GIN1	+	+	Protein involved in regulation of DNA-damage-induced filamentous growth; putative component of DNA replication checkpoint; ortholog of S. cerevisiae Mrc1p, an S-phase checkpoint protein	orf19.658	C1_11440C_A	CAL0000186065
	+	+	No domains	orf19.6583	C7_01460C_A	CAL0000191721
YJL068C	+		Putative esterase; possibly transcriptionally regulated by Tac1; induced by Mnl1 under weak acid stress; protein present in exponential and stationary growth phase yeast cultures	orf19.6596	CR_09670C_A	CAL0000178864
STU2	+		Microtubule-associated protein (MAP) of the XMAP215/Dis1 family; regulates microtubule dynamics during spindle orientation and metaphase chromosome alignment; interacts with spindle pole body component Spc72p	orf19.6610	CR_09520C_A	CAL0000176383
FMA1	+		Putative oxidoreductase	orf19.6837	C1_04450C_A	CAL0000190455
GRE24	+		Putative NADPH-dependent methylglyoxal reductase; homozygous transposon insertion causes decreased colony wrinkling under filamentous growth-inducing conditions, but does not block true hyphal formation in liquid media	orf19.6868	C2_05560W_A	CAL0000200070
OSM1	+		Putative flavoprotein subunit of fumarate reductase	orf19.6882	C2_05700W_A	CAL0000197318
ORC3	+	+		orf19.6942	C3_03750C_A	CAL0000185041
	+		No domains	orf19.7060	C7_00590W_A	CAL0000184538
HAT2	+		Subunit of the Hat1p-Hat2p histone acetyltransferase complex; required for high affinity binding of the complex to free histone H4, thereby enhancing Hat1p activity; similar to human RbAp46 and 48; has a role in telomeric silencing	orf19.7185	C7_03960C_A	CAL0000190335
ACD99	+		Protein with predicted oxidoreductase and dehydrogenase domains	orf19.7288	CR_08920W_A	CAL0000175310
YPR127W	+		Aldo-keto reductase; increased transcript associated with MDR1 overexpression, benomyl or long-term fluconazole treatment; overexpression does not affect drug or oxidative stress sensitivity; stationary phase enriched	orf19.7306	CR_09100C_A	CAL0000182513
	+		No domains	orf19.7406	C3_06260C_A	CAL0000174148
ARG1	+		Argininosuccinate synthase; arginine synthesis; Gcn4, Rim101 regulated	orf19.7469	CR_00620C_A	CAL0000190248
CSM1	+		Putative component of the monopolin complex with role in rDNA silencing, homologous chromosome segregation, protein localization to nucleolar rDNA repeats	orf19.7663	CR_10740W_A	CAL0000199588
LPG20	+		Aldo-keto reductase family protein; similar to aryl alcohol dehydrogenases	orf19.771	C1_04740W_A	CAL0000174538
MED1	+		RNA polymerase II mediator complex subunit; RNA polymerase II transcription cofactor	orf19.826	C2_03980C_A	CAL0000200413
EXO1	+		Putative exodeoxyribonuclease; cell-cycle regulated periodic mRNA expression	orf19.926	C5_00630C_A	CAL0000175291
