# Supplementary material for: Proteins that physically interact with the phosphatase Cdc14 in Candida albicans have diverse roles in the cell cycle
Source: Sci Rep. 2019 Apr 18;9:6258. doi: 10.1038/s41598-019-42530-1 (PMC6472416; doi:10.1038/s41598-019-42530-1)
Supplement: Supplementary file 1 — Dataset 1 [file 41598_2019_42530_MOESM1_ESM.xlsx]

## Sheet: Hits
Protein IDs	Yeast	Hyphae	Fasta headers
orf19.1108		+	>orf19.1108 HAM1 CGDID:CAL0001858 COORDS:Ca21chr5_C_albicans_SC5314:846299-846907W, translated using codon table 12 (202 amino acids) Uncharacterized ORF;Putative deoxyribonucleoside triphosphate pyrophosphohydrolase;caspofungin repressed;regulated by G
orf19.1133		+	>orf19.1133 MSB1 CGDID:CAL0001961 COORDS:Ca21chr1_C_albicans_SC5314:771005-767142C, translated using codon table 12 (1287 amino acids) Verified ORF;Putative regulator of transcription;expression in S. cerevisiae flo8 and flo11 mutants suggests a role in
orf19.1223	+		>orf19.1223 DBF2 CGDID:CAL0002833 COORDS:Ca21chr2_C_albicans_SC5314:1360034-1357902C, translated using codon table 12 (710 amino acids) Verified ORF;Essential serine/threonine protein kinase involved in mitotic spindle formation and cytokinesis;required
orf19.1357	+		>orf19.1357 FCY21 CGDID:CAL0003863 COORDS:Ca21chr2_C_albicans_SC5314:2034842-2036386W, translated using codon table 12 (514 amino acids) Verified ORF;High affinity, high capacity, hypoxanthine-adenine-guanine-cytosine/ H+ symporter;purine-cytosine permea
orf19.1428	+	+	>orf19.1428 DUO1 CGDID:CAL0004529 COORDS:Ca21chr4_C_albicans_SC5314:902219-902734W, translated using codon table 12 (171 amino acids) Uncharacterized ORF;Subunit of the Dam1 (DASH) complex, which acts in chromosome segregation by coupling kinetochores to
orf19.1446	+		>orf19.1446 CLB2 CGDID:CAL0004596 COORDS:Ca21chr2_C_albicans_SC5314:250508-249030C, translated using codon table 12 (492 amino acids) Verified ORF;B-type mitotic cyclin (cyclin-dependent protein kinase regulatory subunit);essential;required for wild-typ
orf19.1451	+		>orf19.1451 SRB9 CGDID:CAL0004613 COORDS:Ca21chr2_C_albicans_SC5314:260784-265781W, translated using codon table 12 (1665 amino acids) Verified ORF;Subunit of the RNA polymerase II mediator complex;transposon mutation affects filamentous growth;suppress
orf19.147	+		>orf19.147 YAK1 CGDID:CAL0003123 COORDS:Ca21chr2_C_albicans_SC5314:979332-976903C, translated using codon table 12 (809 amino acids) Verified ORF;Predicted serine-threonine protein kinase involved in hyphal growth regulation and biofilm formation;biofilm
orf19.1515	+	+	>orf19.1515 CHT4 CGDID:CAL0005409 COORDS:Ca21chr2_C_albicans_SC5314:389302-388136C, translated using codon table 12 (388 amino acids) Uncharacterized ORF;Chitinase;similar to S. cerevisiae sporulation-specific Cts2p;functionally complements A. gossypii
orf19.1570	+		>orf19.1570 ERG7 CGDID:CAL0005598 COORDS:Ca21chr2_C_albicans_SC5314:491866-494052W, translated using codon table 12 (728 amino acids) Verified ORF;2,3-epoxysqualene-lanosterol cyclase (lanosterol synthase), catalyzes the conversion of 2,3-oxidosqualene to
orf19.1598	+		>orf19.1598 ERG24 CGDID:CAL0005685 COORDS:Ca21chr2_C_albicans_SC5314:1914692-1913346C, translated using codon table 12 (448 amino acids) Verified ORF;C-14 sterol reductase, has a role in ergosterol biosynthesis;mutation confers increased sensitivity to d
orf19.1609		+	>orf19.1609 orf19.1609 CGDID:CAL0006321 COORDS:Ca21chr3_C_albicans_SC5314:512847-514847W, translated using codon table 12 (666 amino acids) Uncharacterized ORF;Ortholog(s) have role in endonucleolytic cleavage in ITS1 to separate SSU-rRNA from 5.8S rRNA a
orf19.1618	+		>orf19.1618 GFA1 CGDID:CAL0006344 COORDS:Ca21chr3_C_albicans_SC5314:495612-493471C, translated using codon table 12 (713 amino acids) Verified ORF;Glucosamine-6-phosphate synthase, homotetrameric enzyme of chitin/hexosamine biosynthesis;inhibited by UDP-
orf19.1631	+		>orf19.1631 ERG6 CGDID:CAL0006397 COORDS:Ca21chr3_C_albicans_SC5314:466244-465114C, translated using codon table 12 (376 amino acids) Verified ORF;Delta(24)-sterol C-methyltransferase, converts zymosterol to fecosterol in ergosterol biosynthesis by methyl
orf19.1792	+		>orf19.1792 orf19.1792 CGDID:CAL0000995 COORDS:Ca21chr4_C_albicans_SC5314:1162041-1164398W, translated using codon table 12 (785 amino acids) Uncharacterized ORF;Ortholog(s) have ubiquitin-protein ligase activity
orf19.1801	+		>orf19.1801 CBR1 CGDID:CAL0001574 COORDS:Ca21chr4_C_albicans_SC5314:1189820-1188936C, translated using codon table 12 (294 amino acids) Verified ORF;Putative cytochrome B5 reductase;plasma membrane-localized
orf19.1941	+		>orf19.1941 NUF2 CGDID:CAL0002582 COORDS:Ca21chr5_C_albicans_SC5314:290129-288720C, translated using codon table 12 (469 amino acids) Verified ORF;Kinetochore component;amount of Nuf2p and Mtw1p protein detected at each centromere is consistent with a si
orf19.2084	+	+	>orf19.2084 CDH1 CGDID:CAL0004530 COORDS:Ca21chr2_C_albicans_SC5314:68137-66344C, translated using codon table 12 (597 amino acids) Verified ORF;Protein involved in regulation of mitosis, similar to S. cerevisiae Cdh1p, which is an APC/C component;transc
orf19.2369	+		>orf19.2369 orf19.2369 CGDID:CAL0000773 COORDS:Ca21chrR_C_albicans_SC5314:1490389-1491879W, translated using codon table 12 (496 amino acids) Uncharacterized ORF;Ortholog(s) have ATP binding, DNA replication origin binding activity
orf19.2381	+	+	>orf19.2381 orf19.2381 CGDID:CAL0000806 COORDS:Ca21chrR_C_albicans_SC5314:756742-757680W, translated using codon table 12 (312 amino acids) Uncharacterized ORF;Predicted ORF in Assemblies 19, 20 and 21;possibly an essential gene, disruptants not obtained
orf19.2389	+		>orf19.2389 orf19.2389 CGDID:CAL0000817 COORDS:Ca21chrR_C_albicans_SC5314:746253-745189C, translated using codon table 12 (354 amino acids) Uncharacterized ORF;Ortholog(s) have DNA replication origin binding, DNA strand annealing activity
orf19.2397	+		>orf19.2397 orf19.2397 CGDID:CAL0000842 COORDS:Ca21chrR_C_albicans_SC5314:734584-736089W, translated using codon table 12 (501 amino acids) Uncharacterized ORF;Predicted membrane transporter, member of the anion:cation symporter (ACS) family, major facili
orf19.2400	+		>orf19.2400 orf19.2400 CGDID:CAL0001442 COORDS:Ca21chrR_C_albicans_SC5314:724234-726351W, translated using codon table 12 (705 amino acids) Uncharacterized ORF;Ortholog(s) have role in maturation of SSU-rRNA, nuclear mRNA splicing, via spliceosome, positi
orf19.2416.1	+		>orf19.2416.1 MLC1 CGDID:CAF0006950 COORDS:Ca21chrR_C_albicans_SC5314:702329-701831C, translated using codon table 12 (143 amino acids) Verified ORF;Protein with microtubule-dependent localization to the Spitzenkorper, also localizes to cytokinetic ring i
orf19.267	+	+	>orf19.267 orf19.267 CGDID:CAL0004042 COORDS:Ca21chr3_C_albicans_SC5314:599389-595748C, translated using codon table 12 (1213 amino acids) Verified ORF;Protein required for normal filamentous growth;mRNA binds to She3p
orf19.2672	+		>orf19.2672 NCP1 CGDID:CAL0003511 COORDS:Ca21chr4_C_albicans_SC5314:668328-670370W, translated using codon table 12 (680 amino acids) Verified ORF;NADPH-cytochrome P450 reductase, acts with Erg11p in sterol 14 alpha-demethylation in ergosterol biosynthesi
orf19.2684	+	+	>orf19.2684 orf19.2684 CGDID:CAL0003531 COORDS:Ca21chr4_C_albicans_SC5314:641845-644280W, translated using codon table 12 (811 amino acids) Uncharacterized ORF;Ortholog of <i>C. parapsilosis CDC317</i> : CPAR2_401570, <i>Debaryomyces hansenii CBS767</i> :
orf19.272	+		>orf19.272 FAA21 CGDID:CAL0004057 COORDS:Ca21chr3_C_albicans_SC5314:607345-605189C, translated using codon table 12 (718 amino acids) Uncharacterized ORF;Predicted acyl CoA synthetase;upregulated upon phagocytosis;transcription is regulated by Nrg1p and
orf19.2826	+	+	>orf19.2826 orf19.2826 CGDID:CAL0005085 COORDS:Ca21chrR_C_albicans_SC5314:614526-613126C, translated using codon table 12 (466 amino acids) Uncharacterized ORF;Ortholog of <i>C. parapsilosis CDC317</i> : CPAR2_801140, <i>Candida tenuis NRRL Y-1498</i> : C
orf19.2827	+	+	>orf19.2827 orf19.2827 CGDID:CAL0005087 COORDS:Ca21chrR_C_albicans_SC5314:615887-618253W, translated using codon table 12 (788 amino acids) Uncharacterized ORF;Ortholog(s) have structural constituent of cytoskeleton activity
orf19.2909	+		>orf19.2909 ERG26 CGDID:CAL0005951 COORDS:Ca21chr4_C_albicans_SC5314:1398286-1397234C, translated using codon table 12 (350 amino acids) Verified ORF;C-3 sterol dehydrogenase, catalyzes the second of three steps required to remove two C-4 methyl groups fr
orf19.3000	+	+	>orf19.3000 ORC1 CGDID:CAL0001320 COORDS:Ca21chr1_C_albicans_SC5314:641622-639205C, translated using codon table 12 (805 amino acids) Uncharacterized ORF;Putative origin recognition complex large subunit;essential for viability;similar to S. cerevisiae
orf19.3040	+		>orf19.3040 EHT1 CGDID:CAL0001403 COORDS:Ca21chr1_C_albicans_SC5314:713038-714315W, translated using codon table 12 (425 amino acids) Uncharacterized ORF;Protein similar to <i>S. cerevisiae</i> Eht1p;transcription is induced in response to alpha pheromon
orf19.3091	+		>orf19.3091 orf19.3091 CGDID:CAL0001522 COORDS:Ca21chr4_C_albicans_SC5314:1578626-1582930W, translated using codon table 12 (1434 amino acids) Uncharacterized ORF;Predicted ORF in Assemblies 19, 20 and 21;downregulated during core stress response
orf19.3221	+		>orf19.3221 CPA2 CGDID:CAL0003247 COORDS:Ca21chrR_C_albicans_SC5314:318330-321779W, translated using codon table 12 (1149 amino acids) Uncharacterized ORF;Putative arginine-specific carbamoylphosphate synthetase;protein enriched in stationary phase yeast
orf19.3231	+		>orf19.3231 CDC27 CGDID:CAL0003279 COORDS:Ca21chrR_C_albicans_SC5314:290913-288286C, translated using codon table 12 (875 amino acids) Uncharacterized ORF;Putative ubiquitin-protein ligase;periodic mRNA expression, peak at cell-cycle S/G2 phase
orf19.3240	+		>orf19.3240 ERG27 CGDID:CAL0003306 COORDS:Ca21chrR_C_albicans_SC5314:259606-258566C, translated using codon table 12 (346 amino acids) Verified ORF;3-Keto sterol reductase of ergosterol biosynthesis;acts in C-4 sterol demethylation with Erg25p and Erg26p
orf19.3252	+		>orf19.3252 DAL81 CGDID:CAL0003338 COORDS:Ca21chrR_C_albicans_SC5314:231768-234404W, translated using codon table 12 (878 amino acids) Verified ORF;Predicted zinc-finger transcription factor with similarity to S. cerevisiae Dal81p, which is involved in th
orf19.3289	+		>orf19.3289 orf19.3289 CGDID:CAL0003421 COORDS:Ca21chr1_C_albicans_SC5314:203629-202538C, translated using codon table 12 (363 amino acids) Uncharacterized ORF;Phosphorylated protein of unknown function
orf19.3296	+		>orf19.3296 orf19.3296 CGDID:CAL0003445 COORDS:Ca21chr1_C_albicans_SC5314:210881-212386W, translated using codon table 12 (501 amino acids) Uncharacterized ORF;Ortholog of <i>C. parapsilosis CDC317</i> : CPAR2_110130, <i>Candida tenuis NRRL Y-1498</i> : C
orf19.3311	+		>orf19.3311 IFD3 CGDID:CAL0004065 COORDS:Ca21chr1_C_albicans_SC5314:248825-249874W, translated using codon table 12 (349 amino acids) Uncharacterized ORF;Transcription is regulated by Mig1p
orf19.3356	+		>orf19.3356 ESP1 CGDID:CAL0004160 COORDS:Ca21chr1_C_albicans_SC5314:341515-336719C, translated using codon table 12 (1598 amino acids) Verified ORF;Putative caspase-like cysteine protease;mutation confers increased sensitivity to nocodazole;periodic mRN
orf19.3362;orf19.2671	+		>orf19.3362 orf19.3362 CGDID:CAL0004170 COORDS:Ca21chr4_C_albicans_SC5314:704120-702777C, translated using codon table 12 (447 amino acids) Uncharacterized ORF;Has domain(s) with predicted flavin adenine dinucleotide binding, oxidoreductase activity and r
orf19.3474		+	>orf19.3474 IPL1 CGDID:CAL0005060 COORDS:Ca21chr6_C_albicans_SC5314:482963-481371C, translated using codon table 12 (530 amino acids) Uncharacterized ORF;Putative Aurora kinase;Hap43p-induced gene;induced during planktonic growth;possibly an essential
orf19.3477	+		>orf19.3477 orf19.3477 CGDID:CAL0005064 COORDS:Ca21chr6_C_albicans_SC5314:493478-491532C, translated using codon table 12 (612 amino acids) Uncharacterized ORF;Ortholog(s) have pseudouridine synthase activity, role in snRNA pseudouridine synthesis, tRNA p
orf19.3507	+		>orf19.3507 MCR1 CGDID:CAL0005780 COORDS:Ca21chr6_C_albicans_SC5314:418020-418925W, translated using codon table 12 (301 amino acids) Verified ORF;Putative NADH-cytochrome-b5 reductase;soluble protein in hyphae;biofilm induced;alkaline downregulated;k
orf19.3535	+		>orf19.3535 orf19.3535 CGDID:CAL0005881 COORDS:Ca21chr2_C_albicans_SC5314:1045705-1044839C, translated using codon table 12 (288 amino acids) Uncharacterized ORF;Ortholog(s) have cellular bud neck, fungal-type vacuole localization
orf19.3551	+	+	>orf19.3551 DAD2 CGDID:CAL0005920 COORDS:Ca21chr2_C_albicans_SC5314:1072240-1072617W, translated using codon table 12 (125 amino acids) Verified ORF;Essential subunit of the Dam1 (DASH) complex, which acts in chromosome segregation by coupling kinetochore
orf19.3561	+	+	>orf19.3561 CDC7 CGDID:CAL0005945 COORDS:Ca21chr2_C_albicans_SC5314:1093604-1095574W, translated using codon table 12 (656 amino acids) Uncharacterized ORF;Putative kinase;cell-cycle regulated periodic mRNA expression;S. cerevisiae ortholog is not cell-
orf19.3684	+		>orf19.3684 orf19.3684 CGDID:CAL0000467 COORDS:Ca21chr1_C_albicans_SC5314:478218-477340C, translated using codon table 12 (292 amino acids) Uncharacterized ORF;Has domain(s) with predicted nucleotide binding activity and role in oxidation-reduction proces
orf19.3707	+		>orf19.3707 YHB1 CGDID:CAL0001071 COORDS:Ca21chrR_C_albicans_SC5314:1688203-1687007C, translated using codon table 12 (398 amino acids) Verified ORF;Nitric oxide dioxygenase, acts in nitric oxide scavenging/detoxification;role in virulence in mouse;tran
orf19.3733	+		>orf19.3733 IDP2 CGDID:CAL0001167 COORDS:Ca21chrR_C_albicans_SC5314:525552-526790W, translated using codon table 12 (412 amino acids) Uncharacterized ORF;Isocitrate dehydrogenase;expression is regulated upon white-opaque switching;shows colony morpholog
orf19.3788	+	+	>orf19.3788 SPC34 CGDID:CAL0001301 COORDS:Ca21chr4_C_albicans_SC5314:1056829-1056086C, translated using codon table 12 (247 amino acids) Uncharacterized ORF;Subunit of the Dam1 (DASH) complex, which acts in chromosome segregation by coupling kinetochores
orf19.3809	+		>orf19.3809 BAS1 CGDID:CAL0001915 COORDS:Ca21chr4_C_albicans_SC5314:1013121-1015337W, translated using codon table 12 (738 amino acids) Verified ORF;Putative transcription factor with Myb-like DNA-binding motif;similar to S. cerevisiae Bas1p, which is a
orf19.3823	+		>orf19.3823 ZDS1 CGDID:CAL0001987 COORDS:Ca21chr4_C_albicans_SC5314:982303-987240W, translated using codon table 12 (1645 amino acids) Uncharacterized ORF;Nonessential protein;similar to S. cerevisiae Zds1p
orf19.384	+		>orf19.384 orf19.384 CGDID:CAL0004918 COORDS:Ca21chr1_C_albicans_SC5314:1845892-1844216C, translated using codon table 12 (558 amino acids) Uncharacterized ORF;Ortholog(s) have Golgi apparatus, cytosol, nucleus localization
orf19.3856	+		>orf19.3856 CDC28 CGDID:CAL0002090 COORDS:Ca21chrR_C_albicans_SC5314:1293485-1294438W, translated using codon table 12 (317 amino acids) Verified ORF;Cyclin-dependent protein kinase, interacts with regulatory subunit Cyb1p;involved in determination of ce
orf19.3871	+		>orf19.3871 DAD3 CGDID:CAL0002149 COORDS:Ca21chrR_C_albicans_SC5314:1321396-1320980C, translated using codon table 12 (138 amino acids) Uncharacterized ORF;Subunit of the Dam1 (DASH) complex, which acts in chromosome segregation by coupling kinetochores t
orf19.3954	+		>orf19.3954 orf19.3954 CGDID:CAL0003011 COORDS:Ca21chr5_C_albicans_SC5314:1015820-1019032W, translated using codon table 12 (1070 amino acids) Verified ORF;Ortholog(s) have phosphatidylserine decarboxylase activity and role in phosphatidylcholine biosynth
orf19.4013	+		>orf19.4013 orf19.4013 CGDID:CAL0004678 COORDS:Ca21chr5_C_albicans_SC5314:1141603-1140299C, translated using codon table 12 (434 amino acids) Uncharacterized ORF;Putative protein of unknown function;Hap43p-repressed gene;<I>S. cerevisiae</I> ortholog YH
orf19.4043	+		>orf19.4043 orf19.4043 CGDID:CAL0004811 COORDS:Ca21chr5_C_albicans_SC5314:1174952-1172694C, translated using codon table 12 (752 amino acids) Uncharacterized ORF;Predicted ORF in Assemblies 19, 20 and 21;transcription is induced in response to alpha pher
orf19.406	+		>orf19.406 ERG1 CGDID:CAL0005541 COORDS:Ca21chr1_C_albicans_SC5314:1882136-1880646C, translated using codon table 12 (496 amino acids) Verified ORF;Squalene epoxidase, catalyzes epoxidation of squalene to 2,3(S)-oxidosqualene in the ergosterol biosynthesi
orf19.4101	+		>orf19.4101 orf19.4101 CGDID:CAL0005549 COORDS:Ca21chr2_C_albicans_SC5314:1255179-1255487W, translated using codon table 12 (102 amino acids) Uncharacterized ORF;Ortholog of <i>C. parapsilosis CDC317</i> : CPAR2_104840, <i>Candida tenuis NRRL Y-1498</i> :
orf19.4192	+	+	>orf19.4192 CDC14 CGDID:CAL0005886 COORDS:Ca21chr6_C_albicans_SC5314:116893-118596W, translated using codon table 12 (542 amino acids) Verified ORF;Protein involved in exit from mitosis and morphogenesis;ortholog of S. cerevisiae Cdc14p, which is a dual-
orf19.4208	+	+	>orf19.4208 RAD52 CGDID:CAL0000064 COORDS:Ca21chr6_C_albicans_SC5314:97421-95727C, translated using codon table 12 (564 amino acids) Verified ORF;Required for homologous DNA recombination, repair of UV- or MMS-damaged DNA, telomere length, UV-induced LOH;
orf19.4221	+	+	>orf19.4221 ORC4 CGDID:CAL0000132 COORDS:Ca21chr5_C_albicans_SC5314:479720-478026C, translated using codon table 12 (564 amino acids) Uncharacterized ORF;Phosphorylated protein similar to S. cerevisiae Orc4p;transcription is induced in response to alpha
orf19.427	+	+	>orf19.427 orf19.427 CGDID:CAL0005619 COORDS:Ca21chr1_C_albicans_SC5314:1133437-1128440C, translated using codon table 12 (1665 amino acids) Uncharacterized ORF;Ortholog(s) have telomeric DNA binding activity and role in chromatin silencing at silent mati
orf19.4275	+	+	>orf19.4275 RAD9 CGDID:CAL0000322 COORDS:Ca21chr5_C_albicans_SC5314:586193-582669C, translated using codon table 12 (1174 amino acids) Verified ORF;Protein involved in regulation of DNA-damage-induced filamentous growth;putative component of DNA damage c
orf19.4311	+		>orf19.4311 YNK1 CGDID:CAL0000917 COORDS:Ca21chr5_C_albicans_SC5314:641794-642249W, translated using codon table 12 (151 amino acids) Verified ORF;Nucleoside diphosphate kinase (NDP kinase);homo-hexameric;soluble protein in hyphae;flucytosine induced;
orf19.4435	+	+	>orf19.4435 orf19.4435 CGDID:CAL0001812 COORDS:Ca21chr1_C_albicans_SC5314:1586011-1589922W, translated using codon table 12 (1303 amino acids) Uncharacterized ORF;Ortholog(s) have structural constituent of cytoskeleton activity, role in microtubule nuclea
orf19.4473	+	+	>orf19.4473 SPC19 CGDID:CAL0001953 COORDS:Ca21chr1_C_albicans_SC5314:838307-838834W, translated using codon table 12 (175 amino acids) Uncharacterized ORF;Essential subunit of the Dam1 (DASH) complex, which acts in chromosome segregation by coupling kinet
orf19.4675	+	+	>orf19.4675 ASK1 CGDID:CAL0003789 COORDS:Ca21chr4_C_albicans_SC5314:231171-232955W, translated using codon table 12 (594 amino acids) Uncharacterized ORF;Essential subunit of the Dam1 (DASH) complex, which acts in chromosome segregation by coupling kineto
orf19.4716	+		>orf19.4716 GDH3 CGDID:CAL0004374 COORDS:Ca21chr4_C_albicans_SC5314:1362564-1363934W, translated using codon table 12 (456 amino acids) Verified ORF;NADP-glutamate dehydrogenase;hyphal downregulated;regulated by Nrg1p, Plc1p;Efg1p-downregulated;upregu
orf19.4777	+		>orf19.4777 DAK2 CGDID:CAL0004557 COORDS:Ca21chr1_C_albicans_SC5314:2019470-2017683C, translated using codon table 12 (595 amino acids) Uncharacterized ORF;Putative dihydroxyacetone kinase;transcription decreases upon yeast-hyphal switch;fluconazole-ind
orf19.4837	+	+	>orf19.4837 DAM1 CGDID:CAL0005362 COORDS:Ca21chr1_C_albicans_SC5314:2138563-2139396W, translated using codon table 12 (277 amino acids) Verified ORF;Essential subunit of the Dam1 (DASH) complex, which acts in chromosome segregation by coupling kinetochore
orf19.4988	+	+	>orf19.4988 orf19.4988 CGDID:CAL0000017 COORDS:Ca21chr1_C_albicans_SC5314:2970121-2971638W, translated using codon table 12 (505 amino acids) Uncharacterized ORF;Predicted ORF in Assemblies 19, 20 and 21;greater mRNA abundance observed in a cyr1 homozygo
orf19.5166	+	+	>orf19.5166 DBF4 CGDID:CAL0002629 COORDS:Ca21chr7_C_albicans_SC5314:640747-639227C, translated using codon table 12 (506 amino acids) Uncharacterized ORF;Putative Cdc7p-Dbf4p kinase complex regulatory subunit;Hap43p-induced gene;macrophage/pseudohyphal-
orf19.520	+		>orf19.520 orf19.520 CGDID:CAL0000113 COORDS:Ca21chrR_C_albicans_SC5314:961925-963124W, translated using codon table 12 (399 amino acids) Uncharacterized ORF;Ortholog of <i>C. parapsilosis CDC317</i> : CPAR2_205200, <i>Candida tenuis NRRL Y-1498</i> : CAN
orf19.5246	+		>orf19.5246 orf19.5246 CGDID:CAL0003559 COORDS:Ca21chr1_C_albicans_SC5314:2658916-2657750C, translated using codon table 12 (388 amino acids) Uncharacterized ORF;Hap43p-repressed gene
orf19.5276	+		>orf19.5276 orf19.5276 CGDID:CAL0003621 COORDS:Ca21chr1_C_albicans_SC5314:2605879-2607126W, translated using codon table 12 (415 amino acids) Uncharacterized ORF;Putative nuclear pore-associated protein;Hap43p-induced gene;induced upon low-level peroxid
orf19.5358	+	+	>orf19.5358 orf19.5358 CGDID:CAL0004335 COORDS:Ca21chr2_C_albicans_SC5314:2213298-2211232C, translated using codon table 12 (688 amino acids) Uncharacterized ORF;Phosphorylated protein of unknown function
orf19.5389	+	+	>orf19.5389 FKH2 CGDID:CAL0004415 COORDS:Ca21chr3_C_albicans_SC5314:115299-113160C, translated using codon table 12 (687 amino acids) Verified ORF;Forkhead transcription factor;morphogenesis regulator;required for wild-type hyphal transcription, cell se
orf19.5437	+		>orf19.5437 RHR2 CGDID:CAL0005236 COORDS:Ca21chr3_C_albicans_SC5314:45115-45879W, translated using codon table 12 (254 amino acids) Verified ORF;Glycerol 3-phosphatase;roles in osmotic tolerance, glycerol accumulation in response to salt;required for bi
orf19.5491	+	+	>orf19.5491 orf19.5491 CGDID:CAL0005356 COORDS:Ca21chr2_C_albicans_SC5314:1278420-1277233C, translated using codon table 12 (395 amino acids) Uncharacterized ORF;Ortholog of <i>C. parapsilosis CDC317</i> : CPAR2_104720, <i>Candida tenuis NRRL Y-1498</i> :
orf19.5518	+	+	>orf19.5518 orf19.5518 CGDID:CAL0006096 COORDS:Ca21chr6_C_albicans_SC5314:516545-515805C, translated using codon table 12 (246 amino acids) Uncharacterized ORF;Ortholog of <i>C. parapsilosis CDC317</i> : CPAR2_601850, <i>Candida tenuis NRRL Y-1498</i> : C
orf19.557	+		>orf19.557 orf19.557 CGDID:CAL0000246 COORDS:Ca21chrR_C_albicans_SC5314:1125729-1126754W, translated using codon table 12 (341 amino acids) Uncharacterized ORF;Hap43p-repressed gene;planktonic growth-induced gene
orf19.5614		+	>orf19.5614 orf19.5614 CGDID:CAL0000560 COORDS:Ca21chr6_C_albicans_SC5314:685914-686771W, translated using codon table 12 (285 amino acids) Uncharacterized ORF;Putative ribonuclease H1;biofilm-induced gene;possibly an essential gene, disruptants not obt
orf19.580	+		>orf19.580 orf19.580 CGDID:CAL0000326 COORDS:Ca21chr5_C_albicans_SC5314:185724-184672C, translated using codon table 12 (350 amino acids) Uncharacterized ORF;Protein not essential for viability
orf19.5825		+	>orf19.5825 NCB2 CGDID:CAL0002303 COORDS:Ca21chr2_C_albicans_SC5314:561278-560829C, translated using codon table 12 (149 amino acids) Verified ORF;Beta subunit of NC2, heterodimeric regulator of transcription;activates CDR1 transcription;possibly an ess
orf19.6010	+	+	>orf19.6010 CDC5 CGDID:CAL0005042 COORDS:Ca21chr1_C_albicans_SC5314:193411-191450C, translated using codon table 12 (653 amino acids) Verified ORF;Polo-like kinase;member of conserved Mcm1p regulon;depletion causes defects in spindle elongation and Cdc3
orf19.6011	+		>orf19.6011 SIN3 CGDID:CAL0005043 COORDS:Ca21chr1_C_albicans_SC5314:190152-185514C, translated using codon table 12 (1411 amino acids) Verified ORF;Protein similar to S. cerevisiae Sin3p (transcriptional corepressor involved in histone deacetylase recruit
orf19.6026	+		>orf19.6026 ERG2 CGDID:CAL0005073 COORDS:Ca21chr1_C_albicans_SC5314:155291-154638C, translated using codon table 12 (217 amino acids) Verified ORF;C-8 sterol isomerase;enzyme of ergosterol biosynthesis pathway;converts fecosterol to episterol;mutant is
orf19.6030	+		>orf19.6030 orf19.6030 CGDID:CAL0005097 COORDS:Ca21chr1_C_albicans_SC5314:134256-134915W, translated using codon table 12 (219 amino acids) Uncharacterized ORF;Predicted ORF in Assemblies 19, 20 and 21;transcription detected in high-resolution tiling arr
orf19.6049	+	+	>orf19.6049 orf19.6049 CGDID:CAL0005134 COORDS:Ca21chr1_C_albicans_SC5314:93695-91311C, translated using codon table 12 (794 amino acids) Uncharacterized ORF;Ortholog(s) have protein kinase activator activity, role in protein phosphorylation, regulation o
orf19.6124	+	+	>orf19.6124 ACE2 CGDID:CAL0005982 COORDS:Ca21chrR_C_albicans_SC5314:1611848-1614199W, translated using codon table 12 (783 amino acids) Verified ORF;Transcription factor involved in regulation of morphogenesis, cell separation, adherence, biofilm formatio
orf19.6155	+		>orf19.6155 orf19.6155 CGDID:CAL0006047 COORDS:Ca21chr3_C_albicans_SC5314:167647-165335C, translated using codon table 12 (770 amino acids) Uncharacterized ORF;Ortholog(s) have DNA ligase (ATP) activity
orf19.6234		+	>orf19.6234 orf19.6234 CGDID:CAL0000477 COORDS:Ca21chr1_C_albicans_SC5314:1444495-1442891C, translated using codon table 12 (534 amino acids) Verified ORF;Putative U2 snRNP component;Hap43p-induced gene;mutation confers hypersensitivity to 5-fluorocytos
orf19.6254	+		>orf19.6254 ANT1 CGDID:CAL0000514 COORDS:Ca21chr1_C_albicans_SC5314:1407331-1408368W, translated using codon table 12 (345 amino acids) Uncharacterized ORF;Ortholog(s) have adenine nucleotide transmembrane transporter activity, role in ATP transport, fatt
orf19.6257	+		>orf19.6257 GLT1 CGDID:CAL0000516 COORDS:Ca21chr1_C_albicans_SC5314:1398250-1404630W, translated using codon table 12 (2126 amino acids) Uncharacterized ORF;Putative glutamate synthase;alkaline downregulated;transcription is downregulated in both interm
orf19.6291	+		>orf19.6291 orf19.6291 CGDID:CAL0000615 COORDS:Ca21chrR_C_albicans_SC5314:1651031-1654324W, translated using codon table 12 (1097 amino acids) Uncharacterized ORF;Ortholog(s) have DNA binding, DNA-dependent ATPase activity, chromatin binding, protein homo
orf19.638	+		>orf19.638 FDH1 CGDID:CAL0000982 COORDS:Ca21chrR_C_albicans_SC5314:1118217-1117078C, translated using codon table 12 (379 amino acids) Uncharacterized ORF;Formate dehydrogenase, oxidizes formate to produce CO2;Mig1p regulated;induced by macrophages;flu
orf19.6385	+		>orf19.6385 ACO1 CGDID:CAL0001406 COORDS:Ca21chrR_C_albicans_SC5314:1785893-1783560C, translated using codon table 12 (777 amino acids) Verified ORF;Aconitase;expression greater in high iron;2 upstream CCAAT motifs;amino acid starvation (3-AT), amphote
orf19.6408		+	>orf19.6408 orf19.6408 CGDID:CAL0002114 COORDS:Ca21chrR_C_albicans_SC5314:1816749-1818368W, translated using codon table 12 (539 amino acids) Uncharacterized ORF;Hap43p-repressed gene;induced during planktonic growth
orf19.643		+	>orf19.643 orf19.643 CGDID:CAL0001006 COORDS:Ca21chrR_C_albicans_SC5314:1105224-1109060W, translated using codon table 12 (1278 amino acids) Uncharacterized ORF;Ortholog(s) have role in apoptotic process, mitotic spindle elongation, sister chromatid biori
orf19.6443	+		>orf19.6443 orf19.6443 CGDID:CAL0002210 COORDS:Ca21chrR_C_albicans_SC5314:1872540-1871737C, translated using codon table 12 (267 amino acids) Uncharacterized ORF;Has domain(s) with predicted catalytic activity and role in metabolic process
orf19.6496	+		>orf19.6496 TRS33 CGDID:CAL0002339 COORDS:Ca21chr7_C_albicans_SC5314:477807-477169C, translated using codon table 12 (212 amino acids) Uncharacterized ORF;Putative TRAPP complex subunit;constitutive expression independent of MTL or white-opaque status
orf19.652	+	+	>orf19.652 orf19.652 CGDID:CAL0001028 COORDS:Ca21chrR_C_albicans_SC5314:1082058-1084112W, translated using codon table 12 (684 amino acids) Uncharacterized ORF;Ortholog(s) have crossover junction endodeoxyribonuclease activity, role in DNA repair and cyto
orf19.6536	+		>orf19.6536 IQG1 CGDID:CAL0003156 COORDS:Ca21chr7_C_albicans_SC5314:394417-399360W, translated using codon table 12 (1647 amino acids) Verified ORF;Component of actomyosin ring at bud neck;cell-cycle regulated serine phosphorylation at CDK sites regulate
orf19.658	+	+	>orf19.658 GIN1 CGDID:CAL0001036 COORDS:Ca21chr1_C_albicans_SC5314:2511975-2508271C, translated using codon table 12 (1234 amino acids) Verified ORF;Protein involved in regulation of DNA-damage-induced filamentous growth;putative component of DNA replica
orf19.6583	+	+	>orf19.6583 orf19.6583 CGDID:CAL0003304 COORDS:Ca21chr7_C_albicans_SC5314:308850-305830C, translated using codon table 12 (1006 amino acids) Uncharacterized ORF;Predicted ORF in Assemblies 19, 20 and 21;transcription is induced in response to alpha phero
orf19.6596	+		>orf19.6596 orf19.6596 CGDID:CAL0003339 COORDS:Ca21chrR_C_albicans_SC5314:2055203-2054292C, translated using codon table 12 (303 amino acids) Uncharacterized ORF;Putative esterase;possibly transcriptionally regulated by Tac1p;transcriptionally activated
orf19.6610	+		>orf19.6610 orf19.6610 CGDID:CAL0003948 COORDS:Ca21chrR_C_albicans_SC5314:2031915-2029141C, translated using codon table 12 (924 amino acids) Uncharacterized ORF;Ortholog(s) have microtubule binding, structural constituent of cytoskeleton activity
orf19.6837	+		>orf19.6837 FMA1 CGDID:CAL0005738 COORDS:Ca21chr1_C_albicans_SC5314:918388-917556C, translated using codon table 12 (253 amino acids) Uncharacterized ORF;Protein similar to oxidoreductases;transcription is upregulated in response to treatment with ciclop
orf19.6868	+		>orf19.6868 orf19.6868 CGDID:CAL0005844 COORDS:Ca21chr2_C_albicans_SC5314:1129825-1130841W, translated using codon table 12 (338 amino acids) Verified ORF;Putative NADPH-dependent methylglyoxal reductase;homozygous transposon insertion causes decreased c
orf19.6882	+		>orf19.6882 OSM1 CGDID:CAL0005898 COORDS:Ca21chr2_C_albicans_SC5314:1165501-1167012W, translated using codon table 12 (503 amino acids) Verified ORF;Putative flavoprotein subunit of fumarate reductase;soluble protein in hyphae;fungal-specific (no human
orf19.6942	+	+	>orf19.6942 ORC3 CGDID:CAL0000266 COORDS:Ca21chr3_C_albicans_SC5314:789657-787609C, translated using codon table 12 (682 amino acids) Verified ORF;Protein similar to S. cerevisiae Orc3p, which is a component of the origin recognition complex involved in D
orf19.7060	+		>orf19.7060 orf19.7060 CGDID:CAL0002105 COORDS:Ca21chr7_C_albicans_SC5314:96928-97902W, translated using codon table 12 (324 amino acids) Uncharacterized ORF;Ortholog of <i>C. parapsilosis CDC317</i> : CPAR2_301080, <i>Debaryomyces hansenii CBS767</i> : D
orf19.7185	+		>orf19.7185 orf19.7185 CGDID:CAL0003130 COORDS:Ca21chr7_C_albicans_SC5314:867936-866479C, translated using codon table 12 (485 amino acids) Uncharacterized ORF;Ortholog of <i>C. parapsilosis CDC317</i> : CPAR2_805330, <i>Candida tenuis NRRL Y-1498</i> : C
orf19.7288	+		>orf19.7288 orf19.7288 CGDID:CAL0004000 COORDS:Ca21chrR_C_albicans_SC5314:1911800-1913122W, translated using codon table 12 (440 amino acids) Uncharacterized ORF;Hap43p-repressed gene
orf19.7306	+		>orf19.7306 orf19.7306 CGDID:CAL0004509 COORDS:Ca21chrR_C_albicans_SC5314:1943395-1942346C, translated using codon table 12 (349 amino acids) Uncharacterized ORF;Aldo-keto reductase family protein;increased transcription associated with MDR1 overexpressi
orf19.7406	+		>orf19.7406 orf19.7406 CGDID:CAL0005427 COORDS:Ca21chr3_C_albicans_SC5314:1428029-1425969C, translated using codon table 12 (686 amino acids) Uncharacterized ORF;Ortholog of <i>C. parapsilosis CDC317</i> : CPAR2_404490, <i>Candida tenuis NRRL Y-1498</i> :
orf19.7469	+		>orf19.7469 ARG1 CGDID:CAL0005634 COORDS:Ca21chrR_C_albicans_SC5314:151359-149878C, translated using codon table 12 (493 amino acids) Verified ORF;Argininosuccinate synthase;arginine biosynthesis;regulated by Gcn4p, Rim101p;induced by amino acid starva
orf19.7663	+		>orf19.7663 orf19.7663 CGDID:CAL0000945 COORDS:Ca21chrR_C_albicans_SC5314:2272249-2272926W, translated using codon table 12 (225 amino acids) Uncharacterized ORF;Ortholog(s) have role in homologous chromosome segregation, protein localization to nucleolar
orf19.771	+		>orf19.771 LPG20 CGDID:CAL0001933 COORDS:Ca21chr1_C_albicans_SC5314:984797-985843W, translated using codon table 12 (348 amino acids) Uncharacterized ORF;Aldo-keto reductase family protein;similar to aryl alcohol dehydrogenases;osmotic stress-induced, c
orf19.826	+		>orf19.826 orf19.826 CGDID:CAL0002681 COORDS:Ca21chr2_C_albicans_SC5314:835946-834090C, translated using codon table 12 (618 amino acids) Uncharacterized ORF;Has domain(s) with predicted RNA polymerase II transcription cofactor activity, role in regulatio
orf19.926	+		>orf19.926 EXO1 CGDID:CAL0003631 COORDS:Ca21chr5_C_albicans_SC5314:144424-142325C, translated using codon table 12 (699 amino acids) Uncharacterized ORF;Putative exodeoxyribonuclease;cell-cycle regulated periodic mRNA expression

## Sheet: Hits also significant in lysate
Protein IDs	Yeast	Hyphae	Fasta headers
orf19.1065		+	>orf19.1065 SSA2 CGDID:CAL0001208 COORDS:Ca21chr1_C_albicans_SC5314:892386-890449C, translated using codon table 12 (645 amino acids) Verified ORF;HSP70 family chaperone;found in cell wall fractions;antigenic;role in import of beta-defensin peptides;A
orf19.125		+	>orf19.125 EBP1 CGDID:CAL0003035 COORDS:Ca21chr6_C_albicans_SC5314:230692-229469C, translated using codon table 12 (407 amino acids) Verified ORF;NADPH oxidoreductase;interacts with phenolic substrates such as 17beta-estradiol;possible role in estrogen
orf19.1442	+		>orf19.1442 PLB4.5 CGDID:CAL0004588 COORDS:Ca21chr2_C_albicans_SC5314:241143-243251W, translated using codon table 12 (702 amino acids) Verified ORF;Putative phospholipase B;Hog1p-induced;regulated by Ssn6p;putative GPI-anchor;repressed during cell wa
orf19.1608	+		>orf19.1608 orf19.1608 CGDID:CAL0006319 COORDS:Ca21chr3_C_albicans_SC5314:516763-514997C, translated using codon table 12 (588 amino acids) Uncharacterized ORF;Ortholog(s) have cytosol, nucleus localization
orf19.1631		+	>orf19.1631 ERG6 CGDID:CAL0006397 COORDS:Ca21chr3_C_albicans_SC5314:466244-465114C, translated using codon table 12 (376 amino acids) Verified ORF;Delta(24)-sterol C-methyltransferase, converts zymosterol to fecosterol in ergosterol biosynthesis by methyl
orf19.1779	+		>orf19.1779 MP65 CGDID:CAL0000936 COORDS:Ca21chr2_C_albicans_SC5314:2054703-2053567C, translated using codon table 12 (378 amino acids) Verified ORF;Cell surface mannoprotein;cell-wall glucan metabolism, biofilm, adhesion;adhesin motif;O-glycosylation;
orf19.1801		+	>orf19.1801 CBR1 CGDID:CAL0001574 COORDS:Ca21chr4_C_albicans_SC5314:1189820-1188936C, translated using codon table 12 (294 amino acids) Verified ORF;Putative cytochrome B5 reductase;plasma membrane-localized
orf19.1865		+	>orf19.1865 orf19.1865 CGDID:CAL0001732 COORDS:Ca21chr2_C_albicans_SC5314:1551800-1549956C, translated using codon table 12 (614 amino acids) Uncharacterized ORF;Ortholog(s) have role in reciprocal meiotic recombination and cytosol, endoplasmic reticulum,
orf19.1996	+		>orf19.1996 CHA1 CGDID:CAL0002743 COORDS:Ca21chr2_C_albicans_SC5314:215567-216628W, translated using codon table 12 (353 amino acids) Verified ORF;Similar to catabolic serine/threonine dehydratases;negatively regulated by Rim101p;expression greater in l
orf19.2124	+		>orf19.2124 orf19.2124 CGDID:CAL0005303 COORDS:Ca21chr6_C_albicans_SC5314:985627-984557C, translated using codon table 12 (356 amino acids) Uncharacterized ORF;Has domain(s) with predicted nucleotide binding, oxidoreductase activity, transferase activity,
orf19.2125	+		>orf19.2125 orf19.2125 CGDID:CAL0005305 COORDS:Ca21chr6_C_albicans_SC5314:986080-986535W, translated using codon table 12 (151 amino acids) Verified ORF;GlcNAc-induced protein
orf19.2417	+		>orf19.2417 SMC5 CGDID:CAL0001481 COORDS:Ca21chrR_C_albicans_SC5314:702960-706181W, translated using codon table 12 (1073 amino acids) Verified ORF;Protein similar to S. cerevisiae Smc5p, which is involved in DNA repair;transposon mutation affects filame
orf19.2770.1		+	>orf19.2770.1 SOD1 CGDID:CAL0006717 COORDS:Ca21chr4_C_albicans_SC5314:461741-461032C, translated using codon table 12 (154 amino acids) Verified ORF;Cytosolic copper- and zinc-containing superoxide dismutase, involved in protection from oxidative stress a
orf19.3040		+	>orf19.3040 EHT1 CGDID:CAL0001403 COORDS:Ca21chr1_C_albicans_SC5314:713038-714315W, translated using codon table 12 (425 amino acids) Uncharacterized ORF;Protein similar to <i>S. cerevisiae</i> Eht1p;transcription is induced in response to alpha pheromon
orf19.3240		+	>orf19.3240 ERG27 CGDID:CAL0003306 COORDS:Ca21chrR_C_albicans_SC5314:259606-258566C, translated using codon table 12 (346 amino acids) Verified ORF;3-Keto sterol reductase of ergosterol biosynthesis;acts in C-4 sterol demethylation with Erg25p and Erg26p
orf19.355 orf19.6999	+		>orf19.355 orf19.355 CGDID:CAL0004829 COORDS:Ca21chr3_C_albicans_SC5314:758825-757554C, translated using codon table 12 (423 amino acids) Uncharacterized ORF;Has domain(s) with predicted oxidoreductase activity and role in oxidation-reduction process
orf19.3616		+	>orf19.3616 ERG9 CGDID:CAL0000316 COORDS:Ca21chr2_C_albicans_SC5314:1752011-1753357W, translated using codon table 12 (448 amino acids) Verified ORF;Putative farnesyl-diphosphate farnesyl transferase (squalene synthase) involved in the sterol biosynthesis
orf19.3997 orf19.5113		+	>orf19.3997 ADH1 CGDID:CAL0003176 COORDS:Ca21chr5_C_albicans_SC5314:1107937-1108986W, translated using codon table 12 (349 amino acids) Verified ORF;Alcohol dehydrogenase;oxidizes ethanol into acetaldehyde;at yeast, but not hyphal cell surface;soluble
orf19.4076		+	>orf19.4076 MET10 CGDID:CAL0004909 COORDS:Ca21chr2_C_albicans_SC5314:1875991-1872707C, translated using codon table 12 (1094 amino acids) Uncharacterized ORF;Sulfite reductase;role in sulfur amino acid metabolism;biofilm-induced expression;upregulated
orf19.4212 orf19.4213	+		>orf19.4212 FET99 CGDID:CAL0000094 COORDS:Ca21chr6_C_albicans_SC5314:85591-83711C, translated using codon table 12 (626 amino acids) Verified ORF;Multicopper oxidase family protein similar to S. cerevisiae Fet3p;does not complement S. cerevisiae fet3 mut
orf19.4295	+		>orf19.4295 orf19.4295 CGDID:CAL0000387 COORDS:Ca21chr5_C_albicans_SC5314:619739-616686C, translated using codon table 12 (1017 amino acids) Uncharacterized ORF;Ortholog(s) have DNA binding, nucleosome binding, transcription corepressor activity
orf19.489	+	+	>orf19.489 DAP1 CGDID:CAL0005848 COORDS:Ca21chrR_C_albicans_SC5314:913874-913407C, translated using codon table 12 (155 amino acids) Uncharacterized ORF;Similar to mammalian membrane-associated progesterone receptors involved in DNA damage response;induc
orf19.5025		+	>orf19.5025 MET3 CGDID:CAL0001619 COORDS:Ca21chr1_C_albicans_SC5314:3051624-3053207W, translated using codon table 12 (527 amino acids) Uncharacterized ORF;ATP sulfurlyase of sulfate assimilation;repressed by Met or Cys, Sfu1p, or in fluconazole-resistan
orf19.5180		+	>orf19.5180 PRX1 CGDID:CAL0002689 COORDS:Ca21chr7_C_albicans_SC5314:605347-606078W, translated using codon table 12 (243 amino acids) Verified ORF;Thioredoxin peroxidase;transcriptionally induced by interaction with macrophage;fluconazole induced;Fkh2p
orf19.5517		+	>orf19.5517 orf19.5517 CGDID:CAL0006095 COORDS:Ca21chr6_C_albicans_SC5314:514411-515520W, translated using codon table 12 (369 amino acids) Uncharacterized ORF;Similar to alcohol dehydrogenases;increased transcription is observed upon benomyl treatment;
orf19.5730	+		>orf19.5730 orf19.5730 CGDID:CAL0001417 COORDS:Ca21chr6_C_albicans_SC5314:771412-769871C, translated using codon table 12 (513 amino acids) Uncharacterized ORF;Predicted ORF in Assemblies 19, 20 and 21;clade-associated gene expression
orf19.5949		+	>orf19.5949 FAS2 CGDID:CAL0003358 COORDS:Ca21chr3_C_albicans_SC5314:1036388-1030734C, translated using codon table 12 (1884 amino acids) Verified ORF;Alpha subunit of fatty-acid synthase;required for virulence in mouse systemic infection and rat orophary
orf19.6081		+	>orf19.6081 PHR2 CGDID:CAL0005209 COORDS:Ca21chr1_C_albicans_SC5314:37852-39486W, translated using codon table 12 (544 amino acids) Verified ORF;Glycosidase;role in cell wall structure;may act on beta-1,3-glucan prior to beta-1,6-glucan linkage;role in
orf19.6515		+	>orf19.6515 HSP90 CGDID:CAL0003079 COORDS:Ca21chr7_C_albicans_SC5314:439531-441654W, translated using codon table 12 (707 amino acids) Verified ORF;Essential chaperone, regulates several signal transduction pathways and temperature-induced morphogenesis;
orf19.6689	+	+	>orf19.6689 ARG4 CGDID:CAL0004142 COORDS:Ca21chr7_C_albicans_SC5314:792083-793489W, translated using codon table 12 (468 amino acids) Verified ORF;Argininosuccinate lyase, catalyzes the final step in the arginine biosynthesis pathway;alkaline downregulat
orf19.6758	+	+	>orf19.6758 orf19.6758 CGDID:CAL0004900 COORDS:Ca21chr3_C_albicans_SC5314:1687705-1688574W, translated using codon table 12 (289 amino acids) Uncharacterized ORF;Ortholog(s) have cytosol, nucleus localization
orf19.6837		+	>orf19.6837 FMA1 CGDID:CAL0005738 COORDS:Ca21chr1_C_albicans_SC5314:918388-917556C, translated using codon table 12 (253 amino acids) Uncharacterized ORF;Protein similar to oxidoreductases;transcription is upregulated in response to treatment with ciclop
orf19.700 orf19.1855		+	>orf19.700 SEO1 CGDID:CAL0001698 COORDS:Ca21chrR_C_albicans_SC5314:1429476-1431299W, translated using codon table 12 (607 amino acids) Uncharacterized ORF;Protein with similarity to permeases;transcription is negatively regulated by Sfu1p;flucytosine in
orf19.7111.1	+		>orf19.7111.1 SOD3 CGDID:CAL0006719 COORDS:Ca21chr7_C_albicans_SC5314:15982-16662W, translated using codon table 12 (206 amino acids) Verified ORF;Cytosolic manganese-containing superoxide dismutase;protection against oxidative stress;downregulated by c
orf19.717		+	>orf19.717 HSP60 CGDID:CAL0001744 COORDS:Ca21chrR_C_albicans_SC5314:1388174-1386474C, translated using codon table 12 (566 amino acids) Verified ORF;Heat shock protein;soluble in hyphae;regulated by Nrg1p and by iron;expression greater in high iron;he
orf19.7600	+		>orf19.7600 FDH3 CGDID:CAL0000792 COORDS:Ca21chrR_C_albicans_SC5314:2187850-2186501C, translated using codon table 12 (381 amino acids) Uncharacterized ORF;Glutathione-dependent formaldehyde dehydrogenase involved in glycine catabolism;downregulated by E
orf19.7602		+	>orf19.7602 orf19.7602 CGDID:CAL0000794 COORDS:Ca21chrR_C_albicans_SC5314:2190483-2189443C, translated using codon table 12 (346 amino acids) Uncharacterized ORF;Putative Hsp90p co-chaperone;Hap43p-repressed gene;heavy metal (cadmium) stress-induced;ox
orf19.922		+	>orf19.922 ERG11 CGDID:CAL0003627 COORDS:Ca21chr5_C_albicans_SC5314:149706-148120C, translated using codon table 12 (528 amino acids) Verified ORF;Lanosterol 14-alpha-demethylase, cytochrome P450 family member, role in ergosterol biosynthesis;target of a
orf19.979		+	>orf19.979 FAS1 CGDID:CAL0003782 COORDS:Ca21chr5_C_albicans_SC5314:29661-23548C, translated using codon table 12 (2037 amino acids) Verified ORF;Beta subunit of fatty-acid synthase;multifunctional enzyme;fluconazole-induced;Hap43p-induced;amphotericin

## Sheet: Initial hit list
Protein IDs	IDs no duplicates	Yeast	Hyphae	Fasta headers
orf19.1065	CaO19.1065		+	>orf19.1065 SSA2 CGDID:CAL0001208 COORDS:Ca21chr1_C_albicans_SC5314:892386-890449C, translated using codon table 12 (645 amino acids) Verified ORF;HSP70 family chaperone;found in cell wall fractions;antigenic;role in import of beta-defensin peptides;A
orf19.1108	CaO19.1108		+	>orf19.1108 HAM1 CGDID:CAL0001858 COORDS:Ca21chr5_C_albicans_SC5314:846299-846907W, translated using codon table 12 (202 amino acids) Uncharacterized ORF;Putative deoxyribonucleoside triphosphate pyrophosphohydrolase;caspofungin repressed;regulated by G
orf19.1133	CaO19.1133		+	>orf19.1133 MSB1 CGDID:CAL0001961 COORDS:Ca21chr1_C_albicans_SC5314:771005-767142C, translated using codon table 12 (1287 amino acids) Verified ORF;Putative regulator of transcription;expression in S. cerevisiae flo8 and flo11 mutants suggests a role in
orf19.1223	CaO19.1223	+		>orf19.1223 DBF2 CGDID:CAL0002833 COORDS:Ca21chr2_C_albicans_SC5314:1360034-1357902C, translated using codon table 12 (710 amino acids) Verified ORF;Essential serine/threonine protein kinase involved in mitotic spindle formation and cytokinesis;required
orf19.125	CaO19.125		+	>orf19.125 EBP1 CGDID:CAL0003035 COORDS:Ca21chr6_C_albicans_SC5314:230692-229469C, translated using codon table 12 (407 amino acids) Verified ORF;NADPH oxidoreductase;interacts with phenolic substrates such as 17beta-estradiol;possible role in estrogen
orf19.1357	CaO19.1357	+		>orf19.1357 FCY21 CGDID:CAL0003863 COORDS:Ca21chr2_C_albicans_SC5314:2034842-2036386W, translated using codon table 12 (514 amino acids) Verified ORF;High affinity, high capacity, hypoxanthine-adenine-guanine-cytosine/ H+ symporter;purine-cytosine permea
orf19.1428	CaO19.1428	+	+	>orf19.1428 DUO1 CGDID:CAL0004529 COORDS:Ca21chr4_C_albicans_SC5314:902219-902734W, translated using codon table 12 (171 amino acids) Uncharacterized ORF;Subunit of the Dam1 (DASH) complex, which acts in chromosome segregation by coupling kinetochores to
orf19.1442	CaO19.1442	+		>orf19.1442 PLB4.5 CGDID:CAL0004588 COORDS:Ca21chr2_C_albicans_SC5314:241143-243251W, translated using codon table 12 (702 amino acids) Verified ORF;Putative phospholipase B;Hog1p-induced;regulated by Ssn6p;putative GPI-anchor;repressed during cell wa
orf19.1446	CaO19.1446	+		>orf19.1446 CLB2 CGDID:CAL0004596 COORDS:Ca21chr2_C_albicans_SC5314:250508-249030C, translated using codon table 12 (492 amino acids) Verified ORF;B-type mitotic cyclin (cyclin-dependent protein kinase regulatory subunit);essential;required for wild-typ
orf19.1451	CaO19.1451	+		>orf19.1451 SRB9 CGDID:CAL0004613 COORDS:Ca21chr2_C_albicans_SC5314:260784-265781W, translated using codon table 12 (1665 amino acids) Verified ORF;Subunit of the RNA polymerase II mediator complex;transposon mutation affects filamentous growth;suppress
orf19.147	CaO19.147	+		>orf19.147 YAK1 CGDID:CAL0003123 COORDS:Ca21chr2_C_albicans_SC5314:979332-976903C, translated using codon table 12 (809 amino acids) Verified ORF;Predicted serine-threonine protein kinase involved in hyphal growth regulation and biofilm formation;biofilm
orf19.1515	CaO19.1515	+	+	>orf19.1515 CHT4 CGDID:CAL0005409 COORDS:Ca21chr2_C_albicans_SC5314:389302-388136C, translated using codon table 12 (388 amino acids) Uncharacterized ORF;Chitinase;similar to S. cerevisiae sporulation-specific Cts2p;functionally complements A. gossypii
orf19.1570	CaO19.1570	+		>orf19.1570 ERG7 CGDID:CAL0005598 COORDS:Ca21chr2_C_albicans_SC5314:491866-494052W, translated using codon table 12 (728 amino acids) Verified ORF;2,3-epoxysqualene-lanosterol cyclase (lanosterol synthase), catalyzes the conversion of 2,3-oxidosqualene to
orf19.1598	CaO19.1598	+		>orf19.1598 ERG24 CGDID:CAL0005685 COORDS:Ca21chr2_C_albicans_SC5314:1914692-1913346C, translated using codon table 12 (448 amino acids) Verified ORF;C-14 sterol reductase, has a role in ergosterol biosynthesis;mutation confers increased sensitivity to d
orf19.1608	CaO19.1608	+		>orf19.1608 orf19.1608 CGDID:CAL0006319 COORDS:Ca21chr3_C_albicans_SC5314:516763-514997C, translated using codon table 12 (588 amino acids) Uncharacterized ORF;Ortholog(s) have cytosol, nucleus localization
orf19.1609	CaO19.1609		+	>orf19.1609 orf19.1609 CGDID:CAL0006321 COORDS:Ca21chr3_C_albicans_SC5314:512847-514847W, translated using codon table 12 (666 amino acids) Uncharacterized ORF;Ortholog(s) have role in endonucleolytic cleavage in ITS1 to separate SSU-rRNA from 5.8S rRNA a
orf19.1618	CaO19.1618	+		>orf19.1618 GFA1 CGDID:CAL0006344 COORDS:Ca21chr3_C_albicans_SC5314:495612-493471C, translated using codon table 12 (713 amino acids) Verified ORF;Glucosamine-6-phosphate synthase, homotetrameric enzyme of chitin/hexosamine biosynthesis;inhibited by UDP-
orf19.1631	CaO19.1631	+	+	>orf19.1631 ERG6 CGDID:CAL0006397 COORDS:Ca21chr3_C_albicans_SC5314:466244-465114C, translated using codon table 12 (376 amino acids) Verified ORF;Delta(24)-sterol C-methyltransferase, converts zymosterol to fecosterol in ergosterol biosynthesis by methyl
orf19.1779	CaO19.1779	+		>orf19.1779 MP65 CGDID:CAL0000936 COORDS:Ca21chr2_C_albicans_SC5314:2054703-2053567C, translated using codon table 12 (378 amino acids) Verified ORF;Cell surface mannoprotein;cell-wall glucan metabolism, biofilm, adhesion;adhesin motif;O-glycosylation;
orf19.1792	CaO19.1792	+		>orf19.1792 orf19.1792 CGDID:CAL0000995 COORDS:Ca21chr4_C_albicans_SC5314:1162041-1164398W, translated using codon table 12 (785 amino acids) Uncharacterized ORF;Ortholog(s) have ubiquitin-protein ligase activity
orf19.1801	CaO19.1801	+	+	>orf19.1801 CBR1 CGDID:CAL0001574 COORDS:Ca21chr4_C_albicans_SC5314:1189820-1188936C, translated using codon table 12 (294 amino acids) Verified ORF;Putative cytochrome B5 reductase;plasma membrane-localized
orf19.1865	CaO19.1865		+	>orf19.1865 orf19.1865 CGDID:CAL0001732 COORDS:Ca21chr2_C_albicans_SC5314:1551800-1549956C, translated using codon table 12 (614 amino acids) Uncharacterized ORF;Ortholog(s) have role in reciprocal meiotic recombination and cytosol, endoplasmic reticulum,
orf19.1941	CaO19.1941	+		>orf19.1941 NUF2 CGDID:CAL0002582 COORDS:Ca21chr5_C_albicans_SC5314:290129-288720C, translated using codon table 12 (469 amino acids) Verified ORF;Kinetochore component;amount of Nuf2p and Mtw1p protein detected at each centromere is consistent with a si
orf19.1996	CaO19.1996	+		>orf19.1996 CHA1 CGDID:CAL0002743 COORDS:Ca21chr2_C_albicans_SC5314:215567-216628W, translated using codon table 12 (353 amino acids) Verified ORF;Similar to catabolic serine/threonine dehydratases;negatively regulated by Rim101p;expression greater in l
orf19.2084	CaO19.2084	+	+	>orf19.2084 CDH1 CGDID:CAL0004530 COORDS:Ca21chr2_C_albicans_SC5314:68137-66344C, translated using codon table 12 (597 amino acids) Verified ORF;Protein involved in regulation of mitosis, similar to S. cerevisiae Cdh1p, which is an APC/C component;transc
orf19.2124	CaO19.2124	+		>orf19.2124 orf19.2124 CGDID:CAL0005303 COORDS:Ca21chr6_C_albicans_SC5314:985627-984557C, translated using codon table 12 (356 amino acids) Uncharacterized ORF;Has domain(s) with predicted nucleotide binding, oxidoreductase activity, transferase activity,
orf19.2125	CaO19.2125	+		>orf19.2125 orf19.2125 CGDID:CAL0005305 COORDS:Ca21chr6_C_albicans_SC5314:986080-986535W, translated using codon table 12 (151 amino acids) Verified ORF;GlcNAc-induced protein
orf19.2369	CaO19.2369	+		>orf19.2369 orf19.2369 CGDID:CAL0000773 COORDS:Ca21chrR_C_albicans_SC5314:1490389-1491879W, translated using codon table 12 (496 amino acids) Uncharacterized ORF;Ortholog(s) have ATP binding, DNA replication origin binding activity
orf19.2381	CaO19.2381	+	+	>orf19.2381 orf19.2381 CGDID:CAL0000806 COORDS:Ca21chrR_C_albicans_SC5314:756742-757680W, translated using codon table 12 (312 amino acids) Uncharacterized ORF;Predicted ORF in Assemblies 19, 20 and 21;possibly an essential gene, disruptants not obtained
orf19.2389	CaO19.2389	+		>orf19.2389 orf19.2389 CGDID:CAL0000817 COORDS:Ca21chrR_C_albicans_SC5314:746253-745189C, translated using codon table 12 (354 amino acids) Uncharacterized ORF;Ortholog(s) have DNA replication origin binding, DNA strand annealing activity
orf19.2397	CaO19.2397	+		>orf19.2397 orf19.2397 CGDID:CAL0000842 COORDS:Ca21chrR_C_albicans_SC5314:734584-736089W, translated using codon table 12 (501 amino acids) Uncharacterized ORF;Predicted membrane transporter, member of the anion:cation symporter (ACS) family, major facili
orf19.2400	CaO19.2400	+		>orf19.2400 orf19.2400 CGDID:CAL0001442 COORDS:Ca21chrR_C_albicans_SC5314:724234-726351W, translated using codon table 12 (705 amino acids) Uncharacterized ORF;Ortholog(s) have role in maturation of SSU-rRNA, nuclear mRNA splicing, via spliceosome, positi
orf19.2416.1	CaO19.2416.1	+		>orf19.2416.1 MLC1 CGDID:CAF0006950 COORDS:Ca21chrR_C_albicans_SC5314:702329-701831C, translated using codon table 12 (143 amino acids) Verified ORF;Protein with microtubule-dependent localization to the Spitzenkorper, also localizes to cytokinetic ring i
orf19.2417	CaO19.2417	+		>orf19.2417 SMC5 CGDID:CAL0001481 COORDS:Ca21chrR_C_albicans_SC5314:702960-706181W, translated using codon table 12 (1073 amino acids) Verified ORF;Protein similar to S. cerevisiae Smc5p, which is involved in DNA repair;transposon mutation affects filame
orf19.267	CaO19.267	+	+	>orf19.267 orf19.267 CGDID:CAL0004042 COORDS:Ca21chr3_C_albicans_SC5314:599389-595748C, translated using codon table 12 (1213 amino acids) Verified ORF;Protein required for normal filamentous growth;mRNA binds to She3p
orf19.2672	CaO19.2672	+		>orf19.2672 NCP1 CGDID:CAL0003511 COORDS:Ca21chr4_C_albicans_SC5314:668328-670370W, translated using codon table 12 (680 amino acids) Verified ORF;NADPH-cytochrome P450 reductase, acts with Erg11p in sterol 14 alpha-demethylation in ergosterol biosynthesi
orf19.2684	CaO19.2684	+	+	>orf19.2684 orf19.2684 CGDID:CAL0003531 COORDS:Ca21chr4_C_albicans_SC5314:641845-644280W, translated using codon table 12 (811 amino acids) Uncharacterized ORF;Ortholog of <i>C. parapsilosis CDC317</i> : CPAR2_401570, <i>Debaryomyces hansenii CBS767</i> :
orf19.272	CaO19.272	+		>orf19.272 FAA21 CGDID:CAL0004057 COORDS:Ca21chr3_C_albicans_SC5314:607345-605189C, translated using codon table 12 (718 amino acids) Uncharacterized ORF;Predicted acyl CoA synthetase;upregulated upon phagocytosis;transcription is regulated by Nrg1p and
orf19.2770.1	CaO19.2770.1		+	>orf19.2770.1 SOD1 CGDID:CAL0006717 COORDS:Ca21chr4_C_albicans_SC5314:461741-461032C, translated using codon table 12 (154 amino acids) Verified ORF;Cytosolic copper- and zinc-containing superoxide dismutase, involved in protection from oxidative stress a
orf19.2826	CaO19.2826	+	+	>orf19.2826 orf19.2826 CGDID:CAL0005085 COORDS:Ca21chrR_C_albicans_SC5314:614526-613126C, translated using codon table 12 (466 amino acids) Uncharacterized ORF;Ortholog of <i>C. parapsilosis CDC317</i> : CPAR2_801140, <i>Candida tenuis NRRL Y-1498</i> : C
orf19.2827	CaO19.2827	+	+	>orf19.2827 orf19.2827 CGDID:CAL0005087 COORDS:Ca21chrR_C_albicans_SC5314:615887-618253W, translated using codon table 12 (788 amino acids) Uncharacterized ORF;Ortholog(s) have structural constituent of cytoskeleton activity
orf19.2909	CaO19.2909	+		>orf19.2909 ERG26 CGDID:CAL0005951 COORDS:Ca21chr4_C_albicans_SC5314:1398286-1397234C, translated using codon table 12 (350 amino acids) Verified ORF;C-3 sterol dehydrogenase, catalyzes the second of three steps required to remove two C-4 methyl groups fr
orf19.3000	CaO19.3000	+	+	>orf19.3000 ORC1 CGDID:CAL0001320 COORDS:Ca21chr1_C_albicans_SC5314:641622-639205C, translated using codon table 12 (805 amino acids) Uncharacterized ORF;Putative origin recognition complex large subunit;essential for viability;similar to S. cerevisiae
orf19.3040	CaO19.3040	+	+	>orf19.3040 EHT1 CGDID:CAL0001403 COORDS:Ca21chr1_C_albicans_SC5314:713038-714315W, translated using codon table 12 (425 amino acids) Uncharacterized ORF;Protein similar to <i>S. cerevisiae</i> Eht1p;transcription is induced in response to alpha pheromon
orf19.3091	CaO19.3091	+		>orf19.3091 orf19.3091 CGDID:CAL0001522 COORDS:Ca21chr4_C_albicans_SC5314:1578626-1582930W, translated using codon table 12 (1434 amino acids) Uncharacterized ORF;Predicted ORF in Assemblies 19, 20 and 21;downregulated during core stress response
orf19.3221	CaO19.3221	+		>orf19.3221 CPA2 CGDID:CAL0003247 COORDS:Ca21chrR_C_albicans_SC5314:318330-321779W, translated using codon table 12 (1149 amino acids) Uncharacterized ORF;Putative arginine-specific carbamoylphosphate synthetase;protein enriched in stationary phase yeast
orf19.3231	CaO19.3231	+		>orf19.3231 CDC27 CGDID:CAL0003279 COORDS:Ca21chrR_C_albicans_SC5314:290913-288286C, translated using codon table 12 (875 amino acids) Uncharacterized ORF;Putative ubiquitin-protein ligase;periodic mRNA expression, peak at cell-cycle S/G2 phase
orf19.3240	CaO19.3240	+	+	>orf19.3240 ERG27 CGDID:CAL0003306 COORDS:Ca21chrR_C_albicans_SC5314:259606-258566C, translated using codon table 12 (346 amino acids) Verified ORF;3-Keto sterol reductase of ergosterol biosynthesis;acts in C-4 sterol demethylation with Erg25p and Erg26p
orf19.3252	CaO19.3252	+		>orf19.3252 DAL81 CGDID:CAL0003338 COORDS:Ca21chrR_C_albicans_SC5314:231768-234404W, translated using codon table 12 (878 amino acids) Verified ORF;Predicted zinc-finger transcription factor with similarity to S. cerevisiae Dal81p, which is involved in th
orf19.3289	CaO19.3289	+		>orf19.3289 orf19.3289 CGDID:CAL0003421 COORDS:Ca21chr1_C_albicans_SC5314:203629-202538C, translated using codon table 12 (363 amino acids) Uncharacterized ORF;Phosphorylated protein of unknown function
orf19.3296	CaO19.3296	+		>orf19.3296 orf19.3296 CGDID:CAL0003445 COORDS:Ca21chr1_C_albicans_SC5314:210881-212386W, translated using codon table 12 (501 amino acids) Uncharacterized ORF;Ortholog of <i>C. parapsilosis CDC317</i> : CPAR2_110130, <i>Candida tenuis NRRL Y-1498</i> : C
orf19.3311	CaO19.3311	+		>orf19.3311 IFD3 CGDID:CAL0004065 COORDS:Ca21chr1_C_albicans_SC5314:248825-249874W, translated using codon table 12 (349 amino acids) Uncharacterized ORF;Transcription is regulated by Mig1p
orf19.3356	CaO19.3356	+		>orf19.3356 ESP1 CGDID:CAL0004160 COORDS:Ca21chr1_C_albicans_SC5314:341515-336719C, translated using codon table 12 (1598 amino acids) Verified ORF;Putative caspase-like cysteine protease;mutation confers increased sensitivity to nocodazole;periodic mRN
orf19.3362 orf19.2671	CaO19.3362	+		>orf19.3362 orf19.3362 CGDID:CAL0004170 COORDS:Ca21chr4_C_albicans_SC5314:704120-702777C, translated using codon table 12 (447 amino acids) Uncharacterized ORF;Has domain(s) with predicted flavin adenine dinucleotide binding, oxidoreductase activity and r
orf19.3474	CaO19.3474		+	>orf19.3474 IPL1 CGDID:CAL0005060 COORDS:Ca21chr6_C_albicans_SC5314:482963-481371C, translated using codon table 12 (530 amino acids) Uncharacterized ORF;Putative Aurora kinase;Hap43p-induced gene;induced during planktonic growth;possibly an essential
orf19.3477	CaO19.3477	+		>orf19.3477 orf19.3477 CGDID:CAL0005064 COORDS:Ca21chr6_C_albicans_SC5314:493478-491532C, translated using codon table 12 (612 amino acids) Uncharacterized ORF;Ortholog(s) have pseudouridine synthase activity, role in snRNA pseudouridine synthesis, tRNA p
orf19.3507	CaO19.3507	+		>orf19.3507 MCR1 CGDID:CAL0005780 COORDS:Ca21chr6_C_albicans_SC5314:418020-418925W, translated using codon table 12 (301 amino acids) Verified ORF;Putative NADH-cytochrome-b5 reductase;soluble protein in hyphae;biofilm induced;alkaline downregulated;k
orf19.3535	CaO19.3535	+		>orf19.3535 orf19.3535 CGDID:CAL0005881 COORDS:Ca21chr2_C_albicans_SC5314:1045705-1044839C, translated using codon table 12 (288 amino acids) Uncharacterized ORF;Ortholog(s) have cellular bud neck, fungal-type vacuole localization
orf19.355 orf19.6999	CaO19.355	+		>orf19.355 orf19.355 CGDID:CAL0004829 COORDS:Ca21chr3_C_albicans_SC5314:758825-757554C, translated using codon table 12 (423 amino acids) Uncharacterized ORF;Has domain(s) with predicted oxidoreductase activity and role in oxidation-reduction process
orf19.3551	CaO19.3551	+	+	>orf19.3551 DAD2 CGDID:CAL0005920 COORDS:Ca21chr2_C_albicans_SC5314:1072240-1072617W, translated using codon table 12 (125 amino acids) Verified ORF;Essential subunit of the Dam1 (DASH) complex, which acts in chromosome segregation by coupling kinetochore
orf19.3561	CaO19.3561	+	+	>orf19.3561 CDC7 CGDID:CAL0005945 COORDS:Ca21chr2_C_albicans_SC5314:1093604-1095574W, translated using codon table 12 (656 amino acids) Uncharacterized ORF;Putative kinase;cell-cycle regulated periodic mRNA expression;S. cerevisiae ortholog is not cell-
orf19.3616	CaO19.3616		+	>orf19.3616 ERG9 CGDID:CAL0000316 COORDS:Ca21chr2_C_albicans_SC5314:1752011-1753357W, translated using codon table 12 (448 amino acids) Verified ORF;Putative farnesyl-diphosphate farnesyl transferase (squalene synthase) involved in the sterol biosynthesis
orf19.3684	CaO19.3684	+		>orf19.3684 orf19.3684 CGDID:CAL0000467 COORDS:Ca21chr1_C_albicans_SC5314:478218-477340C, translated using codon table 12 (292 amino acids) Uncharacterized ORF;Has domain(s) with predicted nucleotide binding activity and role in oxidation-reduction proces
orf19.3707	CaO19.3707	+		>orf19.3707 YHB1 CGDID:CAL0001071 COORDS:Ca21chrR_C_albicans_SC5314:1688203-1687007C, translated using codon table 12 (398 amino acids) Verified ORF;Nitric oxide dioxygenase, acts in nitric oxide scavenging/detoxification;role in virulence in mouse;tran
orf19.3733	CaO19.3733	+		>orf19.3733 IDP2 CGDID:CAL0001167 COORDS:Ca21chrR_C_albicans_SC5314:525552-526790W, translated using codon table 12 (412 amino acids) Uncharacterized ORF;Isocitrate dehydrogenase;expression is regulated upon white-opaque switching;shows colony morpholog
orf19.3788	CaO19.3788	+	+	>orf19.3788 SPC34 CGDID:CAL0001301 COORDS:Ca21chr4_C_albicans_SC5314:1056829-1056086C, translated using codon table 12 (247 amino acids) Uncharacterized ORF;Subunit of the Dam1 (DASH) complex, which acts in chromosome segregation by coupling kinetochores
orf19.3809	CaO19.3809	+		>orf19.3809 BAS1 CGDID:CAL0001915 COORDS:Ca21chr4_C_albicans_SC5314:1013121-1015337W, translated using codon table 12 (738 amino acids) Verified ORF;Putative transcription factor with Myb-like DNA-binding motif;similar to S. cerevisiae Bas1p, which is a
orf19.3823	CaO19.3823	+		>orf19.3823 ZDS1 CGDID:CAL0001987 COORDS:Ca21chr4_C_albicans_SC5314:982303-987240W, translated using codon table 12 (1645 amino acids) Uncharacterized ORF;Nonessential protein;similar to S. cerevisiae Zds1p
orf19.384	CaO19.384	+		>orf19.384 orf19.384 CGDID:CAL0004918 COORDS:Ca21chr1_C_albicans_SC5314:1845892-1844216C, translated using codon table 12 (558 amino acids) Uncharacterized ORF;Ortholog(s) have Golgi apparatus, cytosol, nucleus localization
orf19.3856	CaO19.3856	+		>orf19.3856 CDC28 CGDID:CAL0002090 COORDS:Ca21chrR_C_albicans_SC5314:1293485-1294438W, translated using codon table 12 (317 amino acids) Verified ORF;Cyclin-dependent protein kinase, interacts with regulatory subunit Cyb1p;involved in determination of ce
orf19.3871	CaO19.3871	+		>orf19.3871 DAD3 CGDID:CAL0002149 COORDS:Ca21chrR_C_albicans_SC5314:1321396-1320980C, translated using codon table 12 (138 amino acids) Uncharacterized ORF;Subunit of the Dam1 (DASH) complex, which acts in chromosome segregation by coupling kinetochores t
orf19.3954	CaO19.3954	+		>orf19.3954 orf19.3954 CGDID:CAL0003011 COORDS:Ca21chr5_C_albicans_SC5314:1015820-1019032W, translated using codon table 12 (1070 amino acids) Verified ORF;Ortholog(s) have phosphatidylserine decarboxylase activity and role in phosphatidylcholine biosynth
orf19.3997 orf19.5113	CaO19.3997		+	>orf19.3997 ADH1 CGDID:CAL0003176 COORDS:Ca21chr5_C_albicans_SC5314:1107937-1108986W, translated using codon table 12 (349 amino acids) Verified ORF;Alcohol dehydrogenase;oxidizes ethanol into acetaldehyde;at yeast, but not hyphal cell surface;soluble
orf19.4013	CaO19.4013	+		>orf19.4013 orf19.4013 CGDID:CAL0004678 COORDS:Ca21chr5_C_albicans_SC5314:1141603-1140299C, translated using codon table 12 (434 amino acids) Uncharacterized ORF;Putative protein of unknown function;Hap43p-repressed gene;<I>S. cerevisiae</I> ortholog YH
orf19.4043	CaO19.4043	+		>orf19.4043 orf19.4043 CGDID:CAL0004811 COORDS:Ca21chr5_C_albicans_SC5314:1174952-1172694C, translated using codon table 12 (752 amino acids) Uncharacterized ORF;Predicted ORF in Assemblies 19, 20 and 21;transcription is induced in response to alpha pher
orf19.406	CaO19.406	+		>orf19.406 ERG1 CGDID:CAL0005541 COORDS:Ca21chr1_C_albicans_SC5314:1882136-1880646C, translated using codon table 12 (496 amino acids) Verified ORF;Squalene epoxidase, catalyzes epoxidation of squalene to 2,3(S)-oxidosqualene in the ergosterol biosynthesi
orf19.4076	CaO19.4076		+	>orf19.4076 MET10 CGDID:CAL0004909 COORDS:Ca21chr2_C_albicans_SC5314:1875991-1872707C, translated using codon table 12 (1094 amino acids) Uncharacterized ORF;Sulfite reductase;role in sulfur amino acid metabolism;biofilm-induced expression;upregulated
orf19.4101	CaO19.4101	+		>orf19.4101 orf19.4101 CGDID:CAL0005549 COORDS:Ca21chr2_C_albicans_SC5314:1255179-1255487W, translated using codon table 12 (102 amino acids) Uncharacterized ORF;Ortholog of <i>C. parapsilosis CDC317</i> : CPAR2_104840, <i>Candida tenuis NRRL Y-1498</i> :
orf19.4192	CaO19.4192	+	+	>orf19.4192 CDC14 CGDID:CAL0005886 COORDS:Ca21chr6_C_albicans_SC5314:116893-118596W, translated using codon table 12 (542 amino acids) Verified ORF;Protein involved in exit from mitosis and morphogenesis;ortholog of S. cerevisiae Cdc14p, which is a dual-
orf19.4208	CaO19.4208	+	+	>orf19.4208 RAD52 CGDID:CAL0000064 COORDS:Ca21chr6_C_albicans_SC5314:97421-95727C, translated using codon table 12 (564 amino acids) Verified ORF;Required for homologous DNA recombination, repair of UV- or MMS-damaged DNA, telomere length, UV-induced LOH;
orf19.4212 orf19.4213	CaO19.4212	+		>orf19.4212 FET99 CGDID:CAL0000094 COORDS:Ca21chr6_C_albicans_SC5314:85591-83711C, translated using codon table 12 (626 amino acids) Verified ORF;Multicopper oxidase family protein similar to S. cerevisiae Fet3p;does not complement S. cerevisiae fet3 mut
orf19.4221	CaO19.4221	+	+	>orf19.4221 ORC4 CGDID:CAL0000132 COORDS:Ca21chr5_C_albicans_SC5314:479720-478026C, translated using codon table 12 (564 amino acids) Uncharacterized ORF;Phosphorylated protein similar to S. cerevisiae Orc4p;transcription is induced in response to alpha
orf19.427	CaO19.427	+	+	>orf19.427 orf19.427 CGDID:CAL0005619 COORDS:Ca21chr1_C_albicans_SC5314:1133437-1128440C, translated using codon table 12 (1665 amino acids) Uncharacterized ORF;Ortholog(s) have telomeric DNA binding activity and role in chromatin silencing at silent mati
orf19.4275	CaO19.4275	+	+	>orf19.4275 RAD9 CGDID:CAL0000322 COORDS:Ca21chr5_C_albicans_SC5314:586193-582669C, translated using codon table 12 (1174 amino acids) Verified ORF;Protein involved in regulation of DNA-damage-induced filamentous growth;putative component of DNA damage c
orf19.4295	CaO19.4295	+		>orf19.4295 orf19.4295 CGDID:CAL0000387 COORDS:Ca21chr5_C_albicans_SC5314:619739-616686C, translated using codon table 12 (1017 amino acids) Uncharacterized ORF;Ortholog(s) have DNA binding, nucleosome binding, transcription corepressor activity
orf19.4311	CaO19.4311	+		>orf19.4311 YNK1 CGDID:CAL0000917 COORDS:Ca21chr5_C_albicans_SC5314:641794-642249W, translated using codon table 12 (151 amino acids) Verified ORF;Nucleoside diphosphate kinase (NDP kinase);homo-hexameric;soluble protein in hyphae;flucytosine induced;
orf19.4435	CaO19.4435	+	+	>orf19.4435 orf19.4435 CGDID:CAL0001812 COORDS:Ca21chr1_C_albicans_SC5314:1586011-1589922W, translated using codon table 12 (1303 amino acids) Uncharacterized ORF;Ortholog(s) have structural constituent of cytoskeleton activity, role in microtubule nuclea
orf19.4473	CaO19.4473	+	+	>orf19.4473 SPC19 CGDID:CAL0001953 COORDS:Ca21chr1_C_albicans_SC5314:838307-838834W, translated using codon table 12 (175 amino acids) Uncharacterized ORF;Essential subunit of the Dam1 (DASH) complex, which acts in chromosome segregation by coupling kinet
orf19.4675	CaO19.4675	+	+	>orf19.4675 ASK1 CGDID:CAL0003789 COORDS:Ca21chr4_C_albicans_SC5314:231171-232955W, translated using codon table 12 (594 amino acids) Uncharacterized ORF;Essential subunit of the Dam1 (DASH) complex, which acts in chromosome segregation by coupling kineto
orf19.4716	CaO19.4716	+		>orf19.4716 GDH3 CGDID:CAL0004374 COORDS:Ca21chr4_C_albicans_SC5314:1362564-1363934W, translated using codon table 12 (456 amino acids) Verified ORF;NADP-glutamate dehydrogenase;hyphal downregulated;regulated by Nrg1p, Plc1p;Efg1p-downregulated;upregu
orf19.4777	CaO19.4777	+		>orf19.4777 DAK2 CGDID:CAL0004557 COORDS:Ca21chr1_C_albicans_SC5314:2019470-2017683C, translated using codon table 12 (595 amino acids) Uncharacterized ORF;Putative dihydroxyacetone kinase;transcription decreases upon yeast-hyphal switch;fluconazole-ind
orf19.4837	CaO19.4837	+	+	>orf19.4837 DAM1 CGDID:CAL0005362 COORDS:Ca21chr1_C_albicans_SC5314:2138563-2139396W, translated using codon table 12 (277 amino acids) Verified ORF;Essential subunit of the Dam1 (DASH) complex, which acts in chromosome segregation by coupling kinetochore
orf19.489	CaO19.489	+	+	>orf19.489 DAP1 CGDID:CAL0005848 COORDS:Ca21chrR_C_albicans_SC5314:913874-913407C, translated using codon table 12 (155 amino acids) Uncharacterized ORF;Similar to mammalian membrane-associated progesterone receptors involved in DNA damage response;induc
orf19.4988	CaO19.4988	+	+	>orf19.4988 orf19.4988 CGDID:CAL0000017 COORDS:Ca21chr1_C_albicans_SC5314:2970121-2971638W, translated using codon table 12 (505 amino acids) Uncharacterized ORF;Predicted ORF in Assemblies 19, 20 and 21;greater mRNA abundance observed in a cyr1 homozygo
orf19.5025	CaO19.5025		+	>orf19.5025 MET3 CGDID:CAL0001619 COORDS:Ca21chr1_C_albicans_SC5314:3051624-3053207W, translated using codon table 12 (527 amino acids) Uncharacterized ORF;ATP sulfurlyase of sulfate assimilation;repressed by Met or Cys, Sfu1p, or in fluconazole-resistan
orf19.5166	CaO19.5166	+	+	>orf19.5166 DBF4 CGDID:CAL0002629 COORDS:Ca21chr7_C_albicans_SC5314:640747-639227C, translated using codon table 12 (506 amino acids) Uncharacterized ORF;Putative Cdc7p-Dbf4p kinase complex regulatory subunit;Hap43p-induced gene;macrophage/pseudohyphal-
orf19.5180	CaO19.5180		+	>orf19.5180 PRX1 CGDID:CAL0002689 COORDS:Ca21chr7_C_albicans_SC5314:605347-606078W, translated using codon table 12 (243 amino acids) Verified ORF;Thioredoxin peroxidase;transcriptionally induced by interaction with macrophage;fluconazole induced;Fkh2p
orf19.520	CaO19.520	+		>orf19.520 orf19.520 CGDID:CAL0000113 COORDS:Ca21chrR_C_albicans_SC5314:961925-963124W, translated using codon table 12 (399 amino acids) Uncharacterized ORF;Ortholog of <i>C. parapsilosis CDC317</i> : CPAR2_205200, <i>Candida tenuis NRRL Y-1498</i> : CAN
orf19.5246	CaO19.5246	+		>orf19.5246 orf19.5246 CGDID:CAL0003559 COORDS:Ca21chr1_C_albicans_SC5314:2658916-2657750C, translated using codon table 12 (388 amino acids) Uncharacterized ORF;Hap43p-repressed gene
orf19.5276	CaO19.5276	+		>orf19.5276 orf19.5276 CGDID:CAL0003621 COORDS:Ca21chr1_C_albicans_SC5314:2605879-2607126W, translated using codon table 12 (415 amino acids) Uncharacterized ORF;Putative nuclear pore-associated protein;Hap43p-induced gene;induced upon low-level peroxid
orf19.5358	CaO19.5358	+	+	>orf19.5358 orf19.5358 CGDID:CAL0004335 COORDS:Ca21chr2_C_albicans_SC5314:2213298-2211232C, translated using codon table 12 (688 amino acids) Uncharacterized ORF;Phosphorylated protein of unknown function
orf19.5389	CaO19.5389	+	+	>orf19.5389 FKH2 CGDID:CAL0004415 COORDS:Ca21chr3_C_albicans_SC5314:115299-113160C, translated using codon table 12 (687 amino acids) Verified ORF;Forkhead transcription factor;morphogenesis regulator;required for wild-type hyphal transcription, cell se
orf19.5437	CaO19.5437	+		>orf19.5437 RHR2 CGDID:CAL0005236 COORDS:Ca21chr3_C_albicans_SC5314:45115-45879W, translated using codon table 12 (254 amino acids) Verified ORF;Glycerol 3-phosphatase;roles in osmotic tolerance, glycerol accumulation in response to salt;required for bi
orf19.5491	CaO19.5491	+	+	>orf19.5491 orf19.5491 CGDID:CAL0005356 COORDS:Ca21chr2_C_albicans_SC5314:1278420-1277233C, translated using codon table 12 (395 amino acids) Uncharacterized ORF;Ortholog of <i>C. parapsilosis CDC317</i> : CPAR2_104720, <i>Candida tenuis NRRL Y-1498</i> :
orf19.5517	CaO19.5517		+	>orf19.5517 orf19.5517 CGDID:CAL0006095 COORDS:Ca21chr6_C_albicans_SC5314:514411-515520W, translated using codon table 12 (369 amino acids) Uncharacterized ORF;Similar to alcohol dehydrogenases;increased transcription is observed upon benomyl treatment;
orf19.5518	CaO19.5518	+	+	>orf19.5518 orf19.5518 CGDID:CAL0006096 COORDS:Ca21chr6_C_albicans_SC5314:516545-515805C, translated using codon table 12 (246 amino acids) Uncharacterized ORF;Ortholog of <i>C. parapsilosis CDC317</i> : CPAR2_601850, <i>Candida tenuis NRRL Y-1498</i> : C
orf19.557	CaO19.557	+		>orf19.557 orf19.557 CGDID:CAL0000246 COORDS:Ca21chrR_C_albicans_SC5314:1125729-1126754W, translated using codon table 12 (341 amino acids) Uncharacterized ORF;Hap43p-repressed gene;planktonic growth-induced gene
orf19.5614	CaO19.5614		+	>orf19.5614 orf19.5614 CGDID:CAL0000560 COORDS:Ca21chr6_C_albicans_SC5314:685914-686771W, translated using codon table 12 (285 amino acids) Uncharacterized ORF;Putative ribonuclease H1;biofilm-induced gene;possibly an essential gene, disruptants not obt
orf19.5730	CaO19.5730	+		>orf19.5730 orf19.5730 CGDID:CAL0001417 COORDS:Ca21chr6_C_albicans_SC5314:771412-769871C, translated using codon table 12 (513 amino acids) Uncharacterized ORF;Predicted ORF in Assemblies 19, 20 and 21;clade-associated gene expression
orf19.580	CaO19.580	+		>orf19.580 orf19.580 CGDID:CAL0000326 COORDS:Ca21chr5_C_albicans_SC5314:185724-184672C, translated using codon table 12 (350 amino acids) Uncharacterized ORF;Protein not essential for viability
orf19.5825	CaO19.5825		+	>orf19.5825 NCB2 CGDID:CAL0002303 COORDS:Ca21chr2_C_albicans_SC5314:561278-560829C, translated using codon table 12 (149 amino acids) Verified ORF;Beta subunit of NC2, heterodimeric regulator of transcription;activates CDR1 transcription;possibly an ess
orf19.5949	CaO19.5949		+	>orf19.5949 FAS2 CGDID:CAL0003358 COORDS:Ca21chr3_C_albicans_SC5314:1036388-1030734C, translated using codon table 12 (1884 amino acids) Verified ORF;Alpha subunit of fatty-acid synthase;required for virulence in mouse systemic infection and rat orophary
orf19.6010	CaO19.6010	+	+	>orf19.6010 CDC5 CGDID:CAL0005042 COORDS:Ca21chr1_C_albicans_SC5314:193411-191450C, translated using codon table 12 (653 amino acids) Verified ORF;Polo-like kinase;member of conserved Mcm1p regulon;depletion causes defects in spindle elongation and Cdc3
orf19.6011	CaO19.6011	+		>orf19.6011 SIN3 CGDID:CAL0005043 COORDS:Ca21chr1_C_albicans_SC5314:190152-185514C, translated using codon table 12 (1411 amino acids) Verified ORF;Protein similar to S. cerevisiae Sin3p (transcriptional corepressor involved in histone deacetylase recruit
orf19.6026	CaO19.6026	+		>orf19.6026 ERG2 CGDID:CAL0005073 COORDS:Ca21chr1_C_albicans_SC5314:155291-154638C, translated using codon table 12 (217 amino acids) Verified ORF;C-8 sterol isomerase;enzyme of ergosterol biosynthesis pathway;converts fecosterol to episterol;mutant is
orf19.6030	CaO19.6030	+		>orf19.6030 orf19.6030 CGDID:CAL0005097 COORDS:Ca21chr1_C_albicans_SC5314:134256-134915W, translated using codon table 12 (219 amino acids) Uncharacterized ORF;Predicted ORF in Assemblies 19, 20 and 21;transcription detected in high-resolution tiling arr
orf19.6049	CaO19.6049	+	+	>orf19.6049 orf19.6049 CGDID:CAL0005134 COORDS:Ca21chr1_C_albicans_SC5314:93695-91311C, translated using codon table 12 (794 amino acids) Uncharacterized ORF;Ortholog(s) have protein kinase activator activity, role in protein phosphorylation, regulation o
orf19.6081	CaO19.6081		+	>orf19.6081 PHR2 CGDID:CAL0005209 COORDS:Ca21chr1_C_albicans_SC5314:37852-39486W, translated using codon table 12 (544 amino acids) Verified ORF;Glycosidase;role in cell wall structure;may act on beta-1,3-glucan prior to beta-1,6-glucan linkage;role in
orf19.6124	CaO19.6124	+	+	>orf19.6124 ACE2 CGDID:CAL0005982 COORDS:Ca21chrR_C_albicans_SC5314:1611848-1614199W, translated using codon table 12 (783 amino acids) Verified ORF;Transcription factor involved in regulation of morphogenesis, cell separation, adherence, biofilm formatio
orf19.6155	CaO19.6155	+		>orf19.6155 orf19.6155 CGDID:CAL0006047 COORDS:Ca21chr3_C_albicans_SC5314:167647-165335C, translated using codon table 12 (770 amino acids) Uncharacterized ORF;Ortholog(s) have DNA ligase (ATP) activity
orf19.6234	CaO19.6234		+	>orf19.6234 orf19.6234 CGDID:CAL0000477 COORDS:Ca21chr1_C_albicans_SC5314:1444495-1442891C, translated using codon table 12 (534 amino acids) Verified ORF;Putative U2 snRNP component;Hap43p-induced gene;mutation confers hypersensitivity to 5-fluorocytos
orf19.6254	CaO19.6254	+		>orf19.6254 ANT1 CGDID:CAL0000514 COORDS:Ca21chr1_C_albicans_SC5314:1407331-1408368W, translated using codon table 12 (345 amino acids) Uncharacterized ORF;Ortholog(s) have adenine nucleotide transmembrane transporter activity, role in ATP transport, fatt
orf19.6257	CaO19.6257	+		>orf19.6257 GLT1 CGDID:CAL0000516 COORDS:Ca21chr1_C_albicans_SC5314:1398250-1404630W, translated using codon table 12 (2126 amino acids) Uncharacterized ORF;Putative glutamate synthase;alkaline downregulated;transcription is downregulated in both interm
orf19.6291	CaO19.6291	+		>orf19.6291 orf19.6291 CGDID:CAL0000615 COORDS:Ca21chrR_C_albicans_SC5314:1651031-1654324W, translated using codon table 12 (1097 amino acids) Uncharacterized ORF;Ortholog(s) have DNA binding, DNA-dependent ATPase activity, chromatin binding, protein homo
orf19.638	CaO19.638	+		>orf19.638 FDH1 CGDID:CAL0000982 COORDS:Ca21chrR_C_albicans_SC5314:1118217-1117078C, translated using codon table 12 (379 amino acids) Uncharacterized ORF;Formate dehydrogenase, oxidizes formate to produce CO2;Mig1p regulated;induced by macrophages;flu
orf19.6385	CaO19.6385	+		>orf19.6385 ACO1 CGDID:CAL0001406 COORDS:Ca21chrR_C_albicans_SC5314:1785893-1783560C, translated using codon table 12 (777 amino acids) Verified ORF;Aconitase;expression greater in high iron;2 upstream CCAAT motifs;amino acid starvation (3-AT), amphote
orf19.6408	CaO19.6408		+	>orf19.6408 orf19.6408 CGDID:CAL0002114 COORDS:Ca21chrR_C_albicans_SC5314:1816749-1818368W, translated using codon table 12 (539 amino acids) Uncharacterized ORF;Hap43p-repressed gene;induced during planktonic growth
orf19.643	CaO19.643		+	>orf19.643 orf19.643 CGDID:CAL0001006 COORDS:Ca21chrR_C_albicans_SC5314:1105224-1109060W, translated using codon table 12 (1278 amino acids) Uncharacterized ORF;Ortholog(s) have role in apoptotic process, mitotic spindle elongation, sister chromatid biori
orf19.6443	CaO19.6443	+		>orf19.6443 orf19.6443 CGDID:CAL0002210 COORDS:Ca21chrR_C_albicans_SC5314:1872540-1871737C, translated using codon table 12 (267 amino acids) Uncharacterized ORF;Has domain(s) with predicted catalytic activity and role in metabolic process
orf19.6496	CaO19.6496	+		>orf19.6496 TRS33 CGDID:CAL0002339 COORDS:Ca21chr7_C_albicans_SC5314:477807-477169C, translated using codon table 12 (212 amino acids) Uncharacterized ORF;Putative TRAPP complex subunit;constitutive expression independent of MTL or white-opaque status
orf19.6515	CaO19.6515		+	>orf19.6515 HSP90 CGDID:CAL0003079 COORDS:Ca21chr7_C_albicans_SC5314:439531-441654W, translated using codon table 12 (707 amino acids) Verified ORF;Essential chaperone, regulates several signal transduction pathways and temperature-induced morphogenesis;
orf19.652	CaO19.652	+	+	>orf19.652 orf19.652 CGDID:CAL0001028 COORDS:Ca21chrR_C_albicans_SC5314:1082058-1084112W, translated using codon table 12 (684 amino acids) Uncharacterized ORF;Ortholog(s) have crossover junction endodeoxyribonuclease activity, role in DNA repair and cyto
orf19.6536	CaO19.6536	+		>orf19.6536 IQG1 CGDID:CAL0003156 COORDS:Ca21chr7_C_albicans_SC5314:394417-399360W, translated using codon table 12 (1647 amino acids) Verified ORF;Component of actomyosin ring at bud neck;cell-cycle regulated serine phosphorylation at CDK sites regulate
orf19.658	CaO19.658	+	+	>orf19.658 GIN1 CGDID:CAL0001036 COORDS:Ca21chr1_C_albicans_SC5314:2511975-2508271C, translated using codon table 12 (1234 amino acids) Verified ORF;Protein involved in regulation of DNA-damage-induced filamentous growth;putative component of DNA replica
orf19.6583	CaO19.6583	+	+	>orf19.6583 orf19.6583 CGDID:CAL0003304 COORDS:Ca21chr7_C_albicans_SC5314:308850-305830C, translated using codon table 12 (1006 amino acids) Uncharacterized ORF;Predicted ORF in Assemblies 19, 20 and 21;transcription is induced in response to alpha phero
orf19.6596	CaO19.6596	+		>orf19.6596 orf19.6596 CGDID:CAL0003339 COORDS:Ca21chrR_C_albicans_SC5314:2055203-2054292C, translated using codon table 12 (303 amino acids) Uncharacterized ORF;Putative esterase;possibly transcriptionally regulated by Tac1p;transcriptionally activated
orf19.6610	CaO19.6610	+		>orf19.6610 orf19.6610 CGDID:CAL0003948 COORDS:Ca21chrR_C_albicans_SC5314:2031915-2029141C, translated using codon table 12 (924 amino acids) Uncharacterized ORF;Ortholog(s) have microtubule binding, structural constituent of cytoskeleton activity
orf19.6689	CaO19.6689	+	+	>orf19.6689 ARG4 CGDID:CAL0004142 COORDS:Ca21chr7_C_albicans_SC5314:792083-793489W, translated using codon table 12 (468 amino acids) Verified ORF;Argininosuccinate lyase, catalyzes the final step in the arginine biosynthesis pathway;alkaline downregulat
orf19.6758	CaO19.6758	+	+	>orf19.6758 orf19.6758 CGDID:CAL0004900 COORDS:Ca21chr3_C_albicans_SC5314:1687705-1688574W, translated using codon table 12 (289 amino acids) Uncharacterized ORF;Ortholog(s) have cytosol, nucleus localization
orf19.6837	CaO19.6837	+	+	>orf19.6837 FMA1 CGDID:CAL0005738 COORDS:Ca21chr1_C_albicans_SC5314:918388-917556C, translated using codon table 12 (253 amino acids) Uncharacterized ORF;Protein similar to oxidoreductases;transcription is upregulated in response to treatment with ciclop
orf19.6868	CaO19.6868	+		>orf19.6868 orf19.6868 CGDID:CAL0005844 COORDS:Ca21chr2_C_albicans_SC5314:1129825-1130841W, translated using codon table 12 (338 amino acids) Verified ORF;Putative NADPH-dependent methylglyoxal reductase;homozygous transposon insertion causes decreased c
orf19.6882	CaO19.6882	+		>orf19.6882 OSM1 CGDID:CAL0005898 COORDS:Ca21chr2_C_albicans_SC5314:1165501-1167012W, translated using codon table 12 (503 amino acids) Verified ORF;Putative flavoprotein subunit of fumarate reductase;soluble protein in hyphae;fungal-specific (no human
orf19.6942	CaO19.6942	+	+	>orf19.6942 ORC3 CGDID:CAL0000266 COORDS:Ca21chr3_C_albicans_SC5314:789657-787609C, translated using codon table 12 (682 amino acids) Verified ORF;Protein similar to S. cerevisiae Orc3p, which is a component of the origin recognition complex involved in D
orf19.700 orf19.1855	CaO19.700		+	>orf19.700 SEO1 CGDID:CAL0001698 COORDS:Ca21chrR_C_albicans_SC5314:1429476-1431299W, translated using codon table 12 (607 amino acids) Uncharacterized ORF;Protein with similarity to permeases;transcription is negatively regulated by Sfu1p;flucytosine in
orf19.7060	CaO19.7060	+		>orf19.7060 orf19.7060 CGDID:CAL0002105 COORDS:Ca21chr7_C_albicans_SC5314:96928-97902W, translated using codon table 12 (324 amino acids) Uncharacterized ORF;Ortholog of <i>C. parapsilosis CDC317</i> : CPAR2_301080, <i>Debaryomyces hansenii CBS767</i> : D
orf19.7111.1	CaO19.7111.1	+		>orf19.7111.1 SOD3 CGDID:CAL0006719 COORDS:Ca21chr7_C_albicans_SC5314:15982-16662W, translated using codon table 12 (206 amino acids) Verified ORF;Cytosolic manganese-containing superoxide dismutase;protection against oxidative stress;downregulated by c
orf19.717	CaO19.717		+	>orf19.717 HSP60 CGDID:CAL0001744 COORDS:Ca21chrR_C_albicans_SC5314:1388174-1386474C, translated using codon table 12 (566 amino acids) Verified ORF;Heat shock protein;soluble in hyphae;regulated by Nrg1p and by iron;expression greater in high iron;he
orf19.7185	CaO19.7185	+		>orf19.7185 orf19.7185 CGDID:CAL0003130 COORDS:Ca21chr7_C_albicans_SC5314:867936-866479C, translated using codon table 12 (485 amino acids) Uncharacterized ORF;Ortholog of <i>C. parapsilosis CDC317</i> : CPAR2_805330, <i>Candida tenuis NRRL Y-1498</i> : C
orf19.7288	CaO19.7288	+		>orf19.7288 orf19.7288 CGDID:CAL0004000 COORDS:Ca21chrR_C_albicans_SC5314:1911800-1913122W, translated using codon table 12 (440 amino acids) Uncharacterized ORF;Hap43p-repressed gene
orf19.7306	CaO19.7306	+		>orf19.7306 orf19.7306 CGDID:CAL0004509 COORDS:Ca21chrR_C_albicans_SC5314:1943395-1942346C, translated using codon table 12 (349 amino acids) Uncharacterized ORF;Aldo-keto reductase family protein;increased transcription associated with MDR1 overexpressi
orf19.7406	CaO19.7406	+		>orf19.7406 orf19.7406 CGDID:CAL0005427 COORDS:Ca21chr3_C_albicans_SC5314:1428029-1425969C, translated using codon table 12 (686 amino acids) Uncharacterized ORF;Ortholog of <i>C. parapsilosis CDC317</i> : CPAR2_404490, <i>Candida tenuis NRRL Y-1498</i> :
orf19.7469	CaO19.7469	+		>orf19.7469 ARG1 CGDID:CAL0005634 COORDS:Ca21chrR_C_albicans_SC5314:151359-149878C, translated using codon table 12 (493 amino acids) Verified ORF;Argininosuccinate synthase;arginine biosynthesis;regulated by Gcn4p, Rim101p;induced by amino acid starva
orf19.7600	CaO19.7600	+		>orf19.7600 FDH3 CGDID:CAL0000792 COORDS:Ca21chrR_C_albicans_SC5314:2187850-2186501C, translated using codon table 12 (381 amino acids) Uncharacterized ORF;Glutathione-dependent formaldehyde dehydrogenase involved in glycine catabolism;downregulated by E
orf19.7602	CaO19.7602		+	>orf19.7602 orf19.7602 CGDID:CAL0000794 COORDS:Ca21chrR_C_albicans_SC5314:2190483-2189443C, translated using codon table 12 (346 amino acids) Uncharacterized ORF;Putative Hsp90p co-chaperone;Hap43p-repressed gene;heavy metal (cadmium) stress-induced;ox
orf19.7663	CaO19.7663	+		>orf19.7663 orf19.7663 CGDID:CAL0000945 COORDS:Ca21chrR_C_albicans_SC5314:2272249-2272926W, translated using codon table 12 (225 amino acids) Uncharacterized ORF;Ortholog(s) have role in homologous chromosome segregation, protein localization to nucleolar
orf19.771	CaO19.771	+		>orf19.771 LPG20 CGDID:CAL0001933 COORDS:Ca21chr1_C_albicans_SC5314:984797-985843W, translated using codon table 12 (348 amino acids) Uncharacterized ORF;Aldo-keto reductase family protein;similar to aryl alcohol dehydrogenases;osmotic stress-induced, c
orf19.826	CaO19.826	+		>orf19.826 orf19.826 CGDID:CAL0002681 COORDS:Ca21chr2_C_albicans_SC5314:835946-834090C, translated using codon table 12 (618 amino acids) Uncharacterized ORF;Has domain(s) with predicted RNA polymerase II transcription cofactor activity, role in regulatio
orf19.922	CaO19.922		+	>orf19.922 ERG11 CGDID:CAL0003627 COORDS:Ca21chr5_C_albicans_SC5314:149706-148120C, translated using codon table 12 (528 amino acids) Verified ORF;Lanosterol 14-alpha-demethylase, cytochrome P450 family member, role in ergosterol biosynthesis;target of a
orf19.926	CaO19.926	+		>orf19.926 EXO1 CGDID:CAL0003631 COORDS:Ca21chr5_C_albicans_SC5314:144424-142325C, translated using codon table 12 (699 amino acids) Uncharacterized ORF;Putative exodeoxyribonuclease;cell-cycle regulated periodic mRNA expression
orf19.979	CaO19.979		+	>orf19.979 FAS1 CGDID:CAL0003782 COORDS:Ca21chr5_C_albicans_SC5314:29661-23548C, translated using codon table 12 (2037 amino acids) Verified ORF;Beta subunit of fatty-acid synthase;multifunctional enzyme;fluconazole-induced;Hap43p-induced;amphotericin

## Sheet: Complete list of proteins-yeast
H/L ratio	B significant FDR=0.05	B significant FDR=0.01	B significant FDR=0.001	Intensity	B significance Benjamini-Hochbert	Protein.IDs	Fasta.headers
11.6845	+	+	+	9671600	0	orf19.4101	>orf19.4101 orf19.4101 CGDID:CAL0005549 COORDS:Ca21chr2_C_albicans_SC5314:1255179-1255487W, translated using codon table 12 (102 amino acids) Uncharacterized ORF;Ortholog of <i>C. parapsilosis CDC317</i> : CPAR2_104840, <i>Candida tenuis NRRL Y-1498</i> :
11.2968	+	+	+	125510000	0	orf19.3289	>orf19.3289 orf19.3289 CGDID:CAL0003421 COORDS:Ca21chr1_C_albicans_SC5314:203629-202538C, translated using codon table 12 (363 amino acids) Uncharacterized ORF;Phosphorylated protein of unknown function
15.7698	+	+	+	397800000	0	orf19.5491	>orf19.5491 orf19.5491 CGDID:CAL0005356 COORDS:Ca21chr2_C_albicans_SC5314:1278420-1277233C, translated using codon table 12 (395 amino acids) Uncharacterized ORF;Ortholog of <i>C. parapsilosis CDC317</i> : CPAR2_104720, <i>Candida tenuis NRRL Y-1498</i> :
10.2696	+	+	+	95260000	0	orf19.7060	>orf19.7060 orf19.7060 CGDID:CAL0002105 COORDS:Ca21chr7_C_albicans_SC5314:96928-97902W, translated using codon table 12 (324 amino acids) Uncharacterized ORF;Ortholog of <i>C. parapsilosis CDC317</i> : CPAR2_301080, <i>Debaryomyces hansenii CBS767</i> : D
9.81902	+	+	+	62942000	0	orf19.3296	>orf19.3296 orf19.3296 CGDID:CAL0003445 COORDS:Ca21chr1_C_albicans_SC5314:210881-212386W, translated using codon table 12 (501 amino acids) Uncharacterized ORF;Ortholog of <i>C. parapsilosis CDC317</i> : CPAR2_110130, <i>Candida tenuis NRRL Y-1498</i> : C
6.8334	+	+	+	250460000	0	orf19.3551	>orf19.3551 DAD2 CGDID:CAL0005920 COORDS:Ca21chr2_C_albicans_SC5314:1072240-1072617W, translated using codon table 12 (125 amino acids) Verified ORF;Essential subunit of the Dam1 (DASH) complex, which acts in chromosome segregation by coupling kinetochore
14.6944	+	+	+	39781000	0	orf19.4275	>orf19.4275 RAD9 CGDID:CAL0000322 COORDS:Ca21chr5_C_albicans_SC5314:586193-582669C, translated using codon table 12 (1174 amino acids) Verified ORF;Protein involved in regulation of DNA-damage-induced filamentous growth;putative component of DNA damage c
4.94601	+	+	+	396330000	0	orf19.4473	>orf19.4473 SPC19 CGDID:CAL0001953 COORDS:Ca21chr1_C_albicans_SC5314:838307-838834W, translated using codon table 12 (175 amino acids) Uncharacterized ORF;Essential subunit of the Dam1 (DASH) complex, which acts in chromosome segregation by coupling kinet
12.8125	+	+	+	387640000	0	orf19.4988	>orf19.4988 orf19.4988 CGDID:CAL0000017 COORDS:Ca21chr1_C_albicans_SC5314:2970121-2971638W, translated using codon table 12 (505 amino acids) Uncharacterized ORF;Predicted ORF in Assemblies 19, 20 and 21;greater mRNA abundance observed in a cyr1 homozygo
7.23927	+	+	+	247690000	0	orf19.4221	>orf19.4221 ORC4 CGDID:CAL0000132 COORDS:Ca21chr5_C_albicans_SC5314:479720-478026C, translated using codon table 12 (564 amino acids) Uncharacterized ORF;Phosphorylated protein similar to S. cerevisiae Orc4p;transcription is induced in response to alpha
23.1967	+	+	+	47857000	0	orf19.427	>orf19.427 orf19.427 CGDID:CAL0005619 COORDS:Ca21chr1_C_albicans_SC5314:1133437-1128440C, translated using codon table 12 (1665 amino acids) Uncharacterized ORF;Ortholog(s) have telomeric DNA binding activity and role in chromatin silencing at silent mati
8.35078	+	+	+	513420000	0	orf19.6942	>orf19.6942 ORC3 CGDID:CAL0000266 COORDS:Ca21chr3_C_albicans_SC5314:789657-787609C, translated using codon table 12 (682 amino acids) Verified ORF;Protein similar to S. cerevisiae Orc3p, which is a component of the origin recognition complex involved in D
7.85012	+	+	+	201140000	0	orf19.5358	>orf19.5358 orf19.5358 CGDID:CAL0004335 COORDS:Ca21chr2_C_albicans_SC5314:2213298-2211232C, translated using codon table 12 (688 amino acids) Uncharacterized ORF;Phosphorylated protein of unknown function
8.51504	+	+	+	306260000	0	orf19.2084	>orf19.2084 CDH1 CGDID:CAL0004530 COORDS:Ca21chr2_C_albicans_SC5314:68137-66344C, translated using codon table 12 (597 amino acids) Verified ORF;Protein involved in regulation of mitosis, similar to S. cerevisiae Cdh1p, which is an APC/C component;transc
15.1761	+	+	+	159960000	0	orf19.6049	>orf19.6049 orf19.6049 CGDID:CAL0005134 COORDS:Ca21chr1_C_albicans_SC5314:93695-91311C, translated using codon table 12 (794 amino acids) Uncharacterized ORF;Ortholog(s) have protein kinase activator activity, role in protein phosphorylation, regulation o
8.46192	+	+	+	215310000	0	orf19.2369	>orf19.2369 orf19.2369 CGDID:CAL0000773 COORDS:Ca21chrR_C_albicans_SC5314:1490389-1491879W, translated using codon table 12 (496 amino acids) Uncharacterized ORF;Ortholog(s) have ATP binding, DNA replication origin binding activity
23.4082	+	+	+	672620000	0	orf19.4208	>orf19.4208 RAD52 CGDID:CAL0000064 COORDS:Ca21chr6_C_albicans_SC5314:97421-95727C, translated using codon table 12 (564 amino acids) Verified ORF;Required for homologous DNA recombination, repair of UV- or MMS-damaged DNA, telomere length, UV-induced LOH;
7.52385	+	+	+	404640000	0	orf19.3000	>orf19.3000 ORC1 CGDID:CAL0001320 COORDS:Ca21chr1_C_albicans_SC5314:641622-639205C, translated using codon table 12 (805 amino acids) Uncharacterized ORF;Putative origin recognition complex large subunit;essential for viability;similar to S. cerevisiae
7.36132	+	+	+	1633900000	0	orf19.4675	>orf19.4675 ASK1 CGDID:CAL0003789 COORDS:Ca21chr4_C_albicans_SC5314:231171-232955W, translated using codon table 12 (594 amino acids) Uncharacterized ORF;Essential subunit of the Dam1 (DASH) complex, which acts in chromosome segregation by coupling kineto
34.4969	+	+	+	35900000000	0	orf19.4192	>orf19.4192 CDC14 CGDID:CAL0005886 COORDS:Ca21chr6_C_albicans_SC5314:116893-118596W, translated using codon table 12 (542 amino acids) Verified ORF;Protein involved in exit from mitosis and morphogenesis;ortholog of S. cerevisiae Cdc14p, which is a dual-
30.4757	+	+	+	11100000000	0	orf19.652	>orf19.652 orf19.652 CGDID:CAL0001028 COORDS:Ca21chrR_C_albicans_SC5314:1082058-1084112W, translated using codon table 12 (684 amino acids) Uncharacterized ORF;Ortholog(s) have crossover junction endodeoxyribonuclease activity, role in DNA repair and cyto
6.04821	+	+	+	5290000000	0	orf19.2684	>orf19.2684 orf19.2684 CGDID:CAL0003531 COORDS:Ca21chr4_C_albicans_SC5314:641845-644280W, translated using codon table 12 (811 amino acids) Uncharacterized ORF;Ortholog of <i>C. parapsilosis CDC317</i> : CPAR2_401570, <i>Debaryomyces hansenii CBS767</i> :
3.49965	+	+	+	810840000	9.49009e-258	orf19.267	>orf19.267 orf19.267 CGDID:CAL0004042 COORDS:Ca21chr3_C_albicans_SC5314:599389-595748C, translated using codon table 12 (1213 amino acids) Verified ORF;Protein required for normal filamentous growth;mRNA binds to She3p
5.44419	+	+	+	158110000	4.43627e-238	orf19.1428	>orf19.1428 DUO1 CGDID:CAL0004529 COORDS:Ca21chr4_C_albicans_SC5314:902219-902734W, translated using codon table 12 (171 amino acids) Uncharacterized ORF;Subunit of the Dam1 (DASH) complex, which acts in chromosome segregation by coupling kinetochores to
4.08545	+	+	+	586520000	4.20732e-213	orf19.2381	>orf19.2381 orf19.2381 CGDID:CAL0000806 COORDS:Ca21chrR_C_albicans_SC5314:756742-757680W, translated using codon table 12 (312 amino acids) Uncharacterized ORF;Predicted ORF in Assemblies 19, 20 and 21;possibly an essential gene, disruptants not obtained
5.09586	+	+	+	208210000	1.38793e-202	orf19.4837	>orf19.4837 DAM1 CGDID:CAL0005362 COORDS:Ca21chr1_C_albicans_SC5314:2138563-2139396W, translated using codon table 12 (277 amino acids) Verified ORF;Essential subunit of the Dam1 (DASH) complex, which acts in chromosome segregation by coupling kinetochore
5.05574	+	+	+	149750000	1.11156e-198	orf19.3871	>orf19.3871 DAD3 CGDID:CAL0002149 COORDS:Ca21chrR_C_albicans_SC5314:1321396-1320980C, translated using codon table 12 (138 amino acids) Uncharacterized ORF;Subunit of the Dam1 (DASH) complex, which acts in chromosome segregation by coupling kinetochores t
8.10096	+	+	+	16731000	3.84303e-166	orf19.5518	>orf19.5518 orf19.5518 CGDID:CAL0006096 COORDS:Ca21chr6_C_albicans_SC5314:516545-515805C, translated using codon table 12 (246 amino acids) Uncharacterized ORF;Ortholog of <i>C. parapsilosis CDC317</i> : CPAR2_601850, <i>Candida tenuis NRRL Y-1498</i> : C
7.49126	+	+	+	22892000	3.66833e-139	orf19.6030	>orf19.6030 orf19.6030 CGDID:CAL0005097 COORDS:Ca21chr1_C_albicans_SC5314:134256-134915W, translated using codon table 12 (219 amino acids) Uncharacterized ORF;Predicted ORF in Assemblies 19, 20 and 21;transcription detected in high-resolution tiling arr
5.55281	+	+	+	52149000	3.24099e-127	orf19.5166	>orf19.5166 DBF4 CGDID:CAL0002629 COORDS:Ca21chr7_C_albicans_SC5314:640747-639227C, translated using codon table 12 (506 amino acids) Uncharacterized ORF;Putative Cdc7p-Dbf4p kinase complex regulatory subunit;Hap43p-induced gene;macrophage/pseudohyphal-
5.35529	+	+	+	72216000	1.25033e-116	orf19.3561	>orf19.3561 CDC7 CGDID:CAL0005945 COORDS:Ca21chr2_C_albicans_SC5314:1093604-1095574W, translated using codon table 12 (656 amino acids) Uncharacterized ORF;Putative kinase;cell-cycle regulated periodic mRNA expression;S. cerevisiae ortholog is not cell-
4.83952	+	+	+	37739000	3.45782e-91	orf19.6496	>orf19.6496 TRS33 CGDID:CAL0002339 COORDS:Ca21chr7_C_albicans_SC5314:477807-477169C, translated using codon table 12 (212 amino acids) Uncharacterized ORF;Putative TRAPP complex subunit;constitutive expression independent of MTL or white-opaque status
3.55433	+	+	+	111040000	3.54082e-80	orf19.6291	>orf19.6291 orf19.6291 CGDID:CAL0000615 COORDS:Ca21chrR_C_albicans_SC5314:1651031-1654324W, translated using codon table 12 (1097 amino acids) Uncharacterized ORF;Ortholog(s) have DNA binding, DNA-dependent ATPase activity, chromatin binding, protein homo
5.55178	+	+	+	3009800	2.03334e-69	orf19.6689	>orf19.6689 ARG4 CGDID:CAL0004142 COORDS:Ca21chr7_C_albicans_SC5314:792083-793489W, translated using codon table 12 (468 amino acids) Verified ORF;Argininosuccinate lyase, catalyzes the final step in the arginine biosynthesis pathway;alkaline downregulat
5.50238	+	+	+	16058000	5.82389e-68	orf19.638	>orf19.638 FDH1 CGDID:CAL0000982 COORDS:Ca21chrR_C_albicans_SC5314:1118217-1117078C, translated using codon table 12 (379 amino acids) Uncharacterized ORF;Formate dehydrogenase, oxidizes formate to produce CO2;Mig1p regulated;induced by macrophages;flu
3.1752	+	+	+	109700000	9.83441e-59	orf19.355 orf19.6999	>orf19.355 orf19.355 CGDID:CAL0004829 COORDS:Ca21chr3_C_albicans_SC5314:758825-757554C, translated using codon table 12 (423 amino acids) Uncharacterized ORF;Has domain(s) with predicted oxidoreductase activity and role in oxidation-reduction process
3.17385	+	+	+	221950000	1.15621e-58	orf19.1996	>orf19.1996 CHA1 CGDID:CAL0002743 COORDS:Ca21chr2_C_albicans_SC5314:215567-216628W, translated using codon table 12 (353 amino acids) Verified ORF;Similar to catabolic serine/threonine dehydratases;negatively regulated by Rim101p;expression greater in l
4.026	+	+	+	39001000	1.59476e-57	orf19.7663	>orf19.7663 orf19.7663 CGDID:CAL0000945 COORDS:Ca21chrR_C_albicans_SC5314:2272249-2272926W, translated using codon table 12 (225 amino acids) Uncharacterized ORF;Ortholog(s) have role in homologous chromosome segregation, protein localization to nucleolar
3.8724	+	+	+	45948000	4.69149e-52	orf19.557	>orf19.557 orf19.557 CGDID:CAL0000246 COORDS:Ca21chrR_C_albicans_SC5314:1125729-1126754W, translated using codon table 12 (341 amino acids) Uncharacterized ORF;Hap43p-repressed gene;planktonic growth-induced gene
4.588	+	+	+	13376000	7.49761e-44	orf19.926	>orf19.926 EXO1 CGDID:CAL0003631 COORDS:Ca21chr5_C_albicans_SC5314:144424-142325C, translated using codon table 12 (699 amino acids) Uncharacterized ORF;Putative exodeoxyribonuclease;cell-cycle regulated periodic mRNA expression
3.55642	+	+	+	50341000	1.0858e-41	orf19.2826	>orf19.2826 orf19.2826 CGDID:CAL0005085 COORDS:Ca21chrR_C_albicans_SC5314:614526-613126C, translated using codon table 12 (466 amino acids) Uncharacterized ORF;Ortholog of <i>C. parapsilosis CDC317</i> : CPAR2_801140, <i>Candida tenuis NRRL Y-1498</i> : C
4.24506	+	+	+	12273000	3.30152e-36	orf19.1446	>orf19.1446 CLB2 CGDID:CAL0004596 COORDS:Ca21chr2_C_albicans_SC5314:250508-249030C, translated using codon table 12 (492 amino acids) Verified ORF;B-type mitotic cyclin (cyclin-dependent protein kinase regulatory subunit);essential;required for wild-typ
3.84398	+	+	+	31912000	3.10565e-28	orf19.580	>orf19.580 orf19.580 CGDID:CAL0000326 COORDS:Ca21chr5_C_albicans_SC5314:185724-184672C, translated using codon table 12 (350 amino acids) Uncharacterized ORF;Protein not essential for viability
2.04394	+	+	+	313860000	5.4343e-26	orf19.3356	>orf19.3356 ESP1 CGDID:CAL0004160 COORDS:Ca21chr1_C_albicans_SC5314:341515-336719C, translated using codon table 12 (1598 amino acids) Verified ORF;Putative caspase-like cysteine protease;mutation confers increased sensitivity to nocodazole;periodic mRN
2.97419	+	+	+	82905000	1.03944e-25	orf19.2400	>orf19.2400 orf19.2400 CGDID:CAL0001442 COORDS:Ca21chrR_C_albicans_SC5314:724234-726351W, translated using codon table 12 (705 amino acids) Uncharacterized ORF;Ortholog(s) have role in maturation of SSU-rRNA, nuclear mRNA splicing, via spliceosome, positi
3.64774	+	+	+	4622000	1.03399e-24	orf19.1451	>orf19.1451 SRB9 CGDID:CAL0004613 COORDS:Ca21chr2_C_albicans_SC5314:260784-265781W, translated using codon table 12 (1665 amino acids) Verified ORF;Subunit of the RNA polymerase II mediator complex;transposon mutation affects filamentous growth;suppress
3.63039	+	+	+	15297000	2.0605e-24	orf19.658	>orf19.658 GIN1 CGDID:CAL0001036 COORDS:Ca21chr1_C_albicans_SC5314:2511975-2508271C, translated using codon table 12 (1234 amino acids) Verified ORF;Protein involved in regulation of DNA-damage-induced filamentous growth;putative component of DNA replica
2.77402	+	+	+	50669000	3.79813e-21	orf19.5276	>orf19.5276 orf19.5276 CGDID:CAL0003621 COORDS:Ca21chr1_C_albicans_SC5314:2605879-2607126W, translated using codon table 12 (415 amino acids) Uncharacterized ORF;Putative nuclear pore-associated protein;Hap43p-induced gene;induced upon low-level peroxid
2.25608	+	+	+	142160000	6.63223e-21	orf19.4435	>orf19.4435 orf19.4435 CGDID:CAL0001812 COORDS:Ca21chr1_C_albicans_SC5314:1586011-1589922W, translated using codon table 12 (1303 amino acids) Uncharacterized ORF;Ortholog(s) have structural constituent of cytoskeleton activity, role in microtubule nuclea
3.20537	+	+	+	17821000	1.10398e-17	orf19.3809	>orf19.3809 BAS1 CGDID:CAL0001915 COORDS:Ca21chr4_C_albicans_SC5314:1013121-1015337W, translated using codon table 12 (738 amino acids) Verified ORF;Putative transcription factor with Myb-like DNA-binding motif;similar to S. cerevisiae Bas1p, which is a
2.09649	+	+	+	94269000	2.26144e-16	orf19.7469	>orf19.7469 ARG1 CGDID:CAL0005634 COORDS:Ca21chrR_C_albicans_SC5314:151359-149878C, translated using codon table 12 (493 amino acids) Verified ORF;Argininosuccinate synthase;arginine biosynthesis;regulated by Gcn4p, Rim101p;induced by amino acid starva
2.50449	+	+	+	49629000	9.39871e-16	orf19.520	>orf19.520 orf19.520 CGDID:CAL0000113 COORDS:Ca21chrR_C_albicans_SC5314:961925-963124W, translated using codon table 12 (399 amino acids) Uncharacterized ORF;Ortholog of <i>C. parapsilosis CDC317</i> : CPAR2_205200, <i>Candida tenuis NRRL Y-1498</i> : CAN
1.5671	+	+	+	847530000	3.19634e-15	orf19.1515	>orf19.1515 CHT4 CGDID:CAL0005409 COORDS:Ca21chr2_C_albicans_SC5314:389302-388136C, translated using codon table 12 (388 amino acids) Uncharacterized ORF;Chitinase;similar to S. cerevisiae sporulation-specific Cts2p;functionally complements A. gossypii
1.98024	+	+	+	194610000	1.90213e-13	orf19.6583	>orf19.6583 orf19.6583 CGDID:CAL0003304 COORDS:Ca21chr7_C_albicans_SC5314:308850-305830C, translated using codon table 12 (1006 amino acids) Uncharacterized ORF;Predicted ORF in Assemblies 19, 20 and 21;transcription is induced in response to alpha phero
1.51692	+	+	+	1117300000	5.87153e-13	orf19.7600	>orf19.7600 FDH3 CGDID:CAL0000792 COORDS:Ca21chrR_C_albicans_SC5314:2187850-2186501C, translated using codon table 12 (381 amino acids) Uncharacterized ORF;Glutathione-dependent formaldehyde dehydrogenase involved in glycine catabolism;downregulated by E
2.8437	+	+	+	5977700	7.13974e-13	orf19.6536	>orf19.6536 IQG1 CGDID:CAL0003156 COORDS:Ca21chr7_C_albicans_SC5314:394417-399360W, translated using codon table 12 (1647 amino acids) Verified ORF;Component of actomyosin ring at bud neck;cell-cycle regulated serine phosphorylation at CDK sites regulate
1.94212	+	+	+	160030000	1.47692e-12	orf19.3707	>orf19.3707 YHB1 CGDID:CAL0001071 COORDS:Ca21chrR_C_albicans_SC5314:1688203-1687007C, translated using codon table 12 (398 amino acids) Verified ORF;Nitric oxide dioxygenase, acts in nitric oxide scavenging/detoxification;role in virulence in mouse;tran
2.30534	+	+	+	59677000	2.55137e-12	orf19.3477	>orf19.3477 orf19.3477 CGDID:CAL0005064 COORDS:Ca21chr6_C_albicans_SC5314:493478-491532C, translated using codon table 12 (612 amino acids) Uncharacterized ORF;Ortholog(s) have pseudouridine synthase activity, role in snRNA pseudouridine synthesis, tRNA p
1.89845	+	+	+	96927000	1.40354e-11	orf19.6610	>orf19.6610 orf19.6610 CGDID:CAL0003948 COORDS:Ca21chrR_C_albicans_SC5314:2031915-2029141C, translated using codon table 12 (924 amino acids) Uncharacterized ORF;Ortholog(s) have microtubule binding, structural constituent of cytoskeleton activity
1.47179	+	+	+	1551400000	4.28961e-11	orf19.2672	>orf19.2672 NCP1 CGDID:CAL0003511 COORDS:Ca21chr4_C_albicans_SC5314:668328-670370W, translated using codon table 12 (680 amino acids) Verified ORF;NADPH-cytochrome P450 reductase, acts with Erg11p in sterol 14 alpha-demethylation in ergosterol biosynthesi
2.22406	+	+	+	40560000	4.72127e-11	orf19.4295	>orf19.4295 orf19.4295 CGDID:CAL0000387 COORDS:Ca21chr5_C_albicans_SC5314:619739-616686C, translated using codon table 12 (1017 amino acids) Uncharacterized ORF;Ortholog(s) have DNA binding, nucleosome binding, transcription corepressor activity
1.62726	+	+	+	253580000	1.89547e-10	orf19.1570	>orf19.1570 ERG7 CGDID:CAL0005598 COORDS:Ca21chr2_C_albicans_SC5314:491866-494052W, translated using codon table 12 (728 amino acids) Verified ORF;2,3-epoxysqualene-lanosterol cyclase (lanosterol synthase), catalyzes the conversion of 2,3-oxidosqualene to
1.62157	+	+	+	429680000	2.7385e-10	orf19.6596	>orf19.6596 orf19.6596 CGDID:CAL0003339 COORDS:Ca21chrR_C_albicans_SC5314:2055203-2054292C, translated using codon table 12 (303 amino acids) Uncharacterized ORF;Putative esterase;possibly transcriptionally regulated by Tac1p;transcriptionally activated
1.83636	+	+	+	176600000	2.89077e-10	orf19.272	>orf19.272 FAA21 CGDID:CAL0004057 COORDS:Ca21chr3_C_albicans_SC5314:607345-605189C, translated using codon table 12 (718 amino acids) Uncharacterized ORF;Predicted acyl CoA synthetase;upregulated upon phagocytosis;transcription is regulated by Nrg1p and
2.61281	+	+	+	13538000	3.06759e-10	orf19.6124	>orf19.6124 ACE2 CGDID:CAL0005982 COORDS:Ca21chrR_C_albicans_SC5314:1611848-1614199W, translated using codon table 12 (783 amino acids) Verified ORF;Transcription factor involved in regulation of morphogenesis, cell separation, adherence, biofilm formatio
1.82085	+	+	+	128410000	5.95842e-10	orf19.3684	>orf19.3684 orf19.3684 CGDID:CAL0000467 COORDS:Ca21chr1_C_albicans_SC5314:478218-477340C, translated using codon table 12 (292 amino acids) Uncharacterized ORF;Has domain(s) with predicted nucleotide binding activity and role in oxidation-reduction proces
1.7979	+	+	+	159630000	1.69671e-09	orf19.6868	>orf19.6868 orf19.6868 CGDID:CAL0005844 COORDS:Ca21chr2_C_albicans_SC5314:1129825-1130841W, translated using codon table 12 (338 amino acids) Verified ORF;Putative NADPH-dependent methylglyoxal reductase;homozygous transposon insertion causes decreased c
1.78561	+	+	+	115980000	2.93809e-09	orf19.1442	>orf19.1442 PLB4.5 CGDID:CAL0004588 COORDS:Ca21chr2_C_albicans_SC5314:241143-243251W, translated using codon table 12 (702 amino acids) Verified ORF;Putative phospholipase B;Hog1p-induced;regulated by Ssn6p;putative GPI-anchor;repressed during cell wa
1.4219	+	+	+	11600000000	3.18882e-09	orf19.4716	>orf19.4716 GDH3 CGDID:CAL0004374 COORDS:Ca21chr4_C_albicans_SC5314:1362564-1363934W, translated using codon table 12 (456 amino acids) Verified ORF;NADP-glutamate dehydrogenase;hyphal downregulated;regulated by Nrg1p, Plc1p;Efg1p-downregulated;upregu
2.07091	+	+	+	39336000	7.0981e-09	orf19.6254	>orf19.6254 ANT1 CGDID:CAL0000514 COORDS:Ca21chr1_C_albicans_SC5314:1407331-1408368W, translated using codon table 12 (345 amino acids) Uncharacterized ORF;Ortholog(s) have adenine nucleotide transmembrane transporter activity, role in ATP transport, fatt
1.38152	+	+	+	6506200000	7.47426e-08	orf19.6385	>orf19.6385 ACO1 CGDID:CAL0001406 COORDS:Ca21chrR_C_albicans_SC5314:1785893-1783560C, translated using codon table 12 (777 amino acids) Verified ORF;Aconitase;expression greater in high iron;2 upstream CCAAT motifs;amino acid starvation (3-AT), amphote
1.37775	+	+	+	2697700000	9.87819e-08	orf19.1631	>orf19.1631 ERG6 CGDID:CAL0006397 COORDS:Ca21chr3_C_albicans_SC5314:466244-465114C, translated using codon table 12 (376 amino acids) Verified ORF;Delta(24)-sterol C-methyltransferase, converts zymosterol to fecosterol in ergosterol biosynthesis by methyl
2.34836	+	+	+	4887200	1.21814e-07	orf19.3954	>orf19.3954 orf19.3954 CGDID:CAL0003011 COORDS:Ca21chr5_C_albicans_SC5314:1015820-1019032W, translated using codon table 12 (1070 amino acids) Verified ORF;Ortholog(s) have phosphatidylserine decarboxylase activity and role in phosphatidylcholine biosynth
1.5026	+	+	+	570620000	2.85087e-07	orf19.6882	>orf19.6882 OSM1 CGDID:CAL0005898 COORDS:Ca21chr2_C_albicans_SC5314:1165501-1167012W, translated using codon table 12 (503 amino acids) Verified ORF;Putative flavoprotein subunit of fumarate reductase;soluble protein in hyphae;fungal-specific (no human
1.50256	+	+	+	256220000	2.85665e-07	orf19.6758	>orf19.6758 orf19.6758 CGDID:CAL0004900 COORDS:Ca21chr3_C_albicans_SC5314:1687705-1688574W, translated using codon table 12 (289 amino acids) Uncharacterized ORF;Ortholog(s) have cytosol, nucleus localization
1.49108	+	+	+	493160000	5.18291e-07	orf19.2125	>orf19.2125 orf19.2125 CGDID:CAL0005305 COORDS:Ca21chr6_C_albicans_SC5314:986080-986535W, translated using codon table 12 (151 amino acids) Verified ORF;GlcNAc-induced protein
1.90718	+	+	+	54837000	7.51713e-07	orf19.3091	>orf19.3091 orf19.3091 CGDID:CAL0001522 COORDS:Ca21chr4_C_albicans_SC5314:1578626-1582930W, translated using codon table 12 (1434 amino acids) Uncharacterized ORF;Predicted ORF in Assemblies 19, 20 and 21;downregulated during core stress response
1.47794	+	+	+	533220000	1.00905e-06	orf19.3362 orf19.2671	>orf19.3362 orf19.3362 CGDID:CAL0004170 COORDS:Ca21chr4_C_albicans_SC5314:704120-702777C, translated using codon table 12 (447 amino acids) Uncharacterized ORF;Has domain(s) with predicted flavin adenine dinucleotide binding, oxidoreductase activity and r
2.23963	+	+	+	8388200	1.06164e-06	orf19.5730	>orf19.5730 orf19.5730 CGDID:CAL0001417 COORDS:Ca21chr6_C_albicans_SC5314:771412-769871C, translated using codon table 12 (513 amino acids) Uncharacterized ORF;Predicted ORF in Assemblies 19, 20 and 21;clade-associated gene expression
1.47458	+	+	+	554250000	1.19321e-06	orf19.406	>orf19.406 ERG1 CGDID:CAL0005541 COORDS:Ca21chr1_C_albicans_SC5314:1882136-1880646C, translated using codon table 12 (496 amino acids) Verified ORF;Squalene epoxidase, catalyzes epoxidation of squalene to 2,3(S)-oxidosqualene in the ergosterol biosynthesi
1.34048	+	+	+	13500000000	1.35981e-06	orf19.7288	>orf19.7288 orf19.7288 CGDID:CAL0004000 COORDS:Ca21chrR_C_albicans_SC5314:1911800-1913122W, translated using codon table 12 (440 amino acids) Uncharacterized ORF;Hap43p-repressed gene
1.33666	+	+	+	1225700000	1.75376e-06	orf19.3040	>orf19.3040 EHT1 CGDID:CAL0001403 COORDS:Ca21chr1_C_albicans_SC5314:713038-714315W, translated using codon table 12 (425 amino acids) Uncharacterized ORF;Protein similar to <i>S. cerevisiae</i> Eht1p;transcription is induced in response to alpha pheromon
2.21012	+	+	+	13166000	1.85481e-06	orf19.384	>orf19.384 orf19.384 CGDID:CAL0004918 COORDS:Ca21chr1_C_albicans_SC5314:1845892-1844216C, translated using codon table 12 (558 amino acids) Uncharacterized ORF;Ortholog(s) have Golgi apparatus, cytosol, nucleus localization
1.46223	+	+	+	376040000	2.18821e-06	orf19.3733	>orf19.3733 IDP2 CGDID:CAL0001167 COORDS:Ca21chrR_C_albicans_SC5314:525552-526790W, translated using codon table 12 (412 amino acids) Uncharacterized ORF;Isocitrate dehydrogenase;expression is regulated upon white-opaque switching;shows colony morpholog
1.45871	+	+	+	666260000	2.59365e-06	orf19.4777	>orf19.4777 DAK2 CGDID:CAL0004557 COORDS:Ca21chr1_C_albicans_SC5314:2019470-2017683C, translated using codon table 12 (595 amino acids) Uncharacterized ORF;Putative dihydroxyacetone kinase;transcription decreases upon yeast-hyphal switch;fluconazole-ind
2.1587	+	+	+	27389000	4.75903e-06	orf19.5389	>orf19.5389 FKH2 CGDID:CAL0004415 COORDS:Ca21chr3_C_albicans_SC5314:115299-113160C, translated using codon table 12 (687 amino acids) Verified ORF;Forkhead transcription factor;morphogenesis regulator;required for wild-type hyphal transcription, cell se
1.59378	+	+	+	169210000	5.43898e-06	orf19.2124	>orf19.2124 orf19.2124 CGDID:CAL0005303 COORDS:Ca21chr6_C_albicans_SC5314:985627-984557C, translated using codon table 12 (356 amino acids) Uncharacterized ORF;Has domain(s) with predicted nucleotide binding, oxidoreductase activity, transferase activity,
1.59201	+	+	+	128480000	5.77661e-06	orf19.489	>orf19.489 DAP1 CGDID:CAL0005848 COORDS:Ca21chrR_C_albicans_SC5314:913874-913407C, translated using codon table 12 (155 amino acids) Uncharacterized ORF;Similar to mammalian membrane-associated progesterone receptors involved in DNA damage response;induc
1.55015	+	+	+	141310000	2.29408e-05	orf19.3823	>orf19.3823 ZDS1 CGDID:CAL0001987 COORDS:Ca21chr4_C_albicans_SC5314:982303-987240W, translated using codon table 12 (1645 amino acids) Uncharacterized ORF;Nonessential protein;similar to S. cerevisiae Zds1p
1.54999	+	+	+	162110000	2.30572e-05	orf19.2397	>orf19.2397 orf19.2397 CGDID:CAL0000842 COORDS:Ca21chrR_C_albicans_SC5314:734584-736089W, translated using codon table 12 (501 amino acids) Uncharacterized ORF;Predicted membrane transporter, member of the anion:cation symporter (ACS) family, major facili
2.06184	+	+	+	10978000	2.53213e-05	orf19.826	>orf19.826 orf19.826 CGDID:CAL0002681 COORDS:Ca21chr2_C_albicans_SC5314:835946-834090C, translated using codon table 12 (618 amino acids) Uncharacterized ORF;Has domain(s) with predicted RNA polymerase II transcription cofactor activity, role in regulatio
1.39145	+	+		442560000	5.29737e-05	orf19.5437	>orf19.5437 RHR2 CGDID:CAL0005236 COORDS:Ca21chr3_C_albicans_SC5314:45115-45879W, translated using codon table 12 (254 amino acids) Verified ORF;Glycerol 3-phosphatase;roles in osmotic tolerance, glycerol accumulation in response to salt;required for bi
1.7279	+	+		64182000	5.46752e-05	orf19.6155	>orf19.6155 orf19.6155 CGDID:CAL0006047 COORDS:Ca21chr3_C_albicans_SC5314:167647-165335C, translated using codon table 12 (770 amino acids) Uncharacterized ORF;Ortholog(s) have DNA ligase (ATP) activity
1.72708	+	+		47865000	5.56536e-05	orf19.7306	>orf19.7306 orf19.7306 CGDID:CAL0004509 COORDS:Ca21chrR_C_albicans_SC5314:1943395-1942346C, translated using codon table 12 (349 amino acids) Uncharacterized ORF;Aldo-keto reductase family protein;increased transcription associated with MDR1 overexpressi
2.00887	+	+		20793000	5.96772e-05	orf19.2827	>orf19.2827 orf19.2827 CGDID:CAL0005087 COORDS:Ca21chrR_C_albicans_SC5314:615887-618253W, translated using codon table 12 (788 amino acids) Uncharacterized ORF;Ortholog(s) have structural constituent of cytoskeleton activity
1.51046	+	+		112460000	7.79088e-05	orf19.6026	>orf19.6026 ERG2 CGDID:CAL0005073 COORDS:Ca21chr1_C_albicans_SC5314:155291-154638C, translated using codon table 12 (217 amino acids) Verified ORF;C-8 sterol isomerase;enzyme of ergosterol biosynthesis pathway;converts fecosterol to episterol;mutant is
1.26702	+	+		26100000000	0.000114588	orf19.3311	>orf19.3311 IFD3 CGDID:CAL0004065 COORDS:Ca21chr1_C_albicans_SC5314:248825-249874W, translated using codon table 12 (349 amino acids) Uncharacterized ORF;Transcription is regulated by Mig1p
1.26164	+	+		4060000000	0.000152713	orf19.4311	>orf19.4311 YNK1 CGDID:CAL0000917 COORDS:Ca21chr5_C_albicans_SC5314:641794-642249W, translated using codon table 12 (151 amino acids) Verified ORF;Nucleoside diphosphate kinase (NDP kinase);homo-hexameric;soluble protein in hyphae;flucytosine induced;
1.36339	+	+		257830000	0.000163725	orf19.4043	>orf19.4043 orf19.4043 CGDID:CAL0004811 COORDS:Ca21chr5_C_albicans_SC5314:1174952-1172694C, translated using codon table 12 (752 amino acids) Uncharacterized ORF;Predicted ORF in Assemblies 19, 20 and 21;transcription is induced in response to alpha pher
1.25895	+	+		940180000	0.000175916	orf19.1801	>orf19.1801 CBR1 CGDID:CAL0001574 COORDS:Ca21chr4_C_albicans_SC5314:1189820-1188936C, translated using codon table 12 (294 amino acids) Verified ORF;Putative cytochrome B5 reductase;plasma membrane-localized
1.67116	+	+		55621000	0.000177996	orf19.4013	>orf19.4013 orf19.4013 CGDID:CAL0004678 COORDS:Ca21chr5_C_albicans_SC5314:1141603-1140299C, translated using codon table 12 (434 amino acids) Uncharacterized ORF;Putative protein of unknown function;Hap43p-repressed gene;<I>S. cerevisiae</I> ortholog YH
1.4815	+	+		105030000	0.000180506	orf19.3252	>orf19.3252 DAL81 CGDID:CAL0003338 COORDS:Ca21chrR_C_albicans_SC5314:231768-234404W, translated using codon table 12 (878 amino acids) Verified ORF;Predicted zinc-finger transcription factor with similarity to S. cerevisiae Dal81p, which is involved in th
1.669	+	+		48365000	0.000185875	orf19.7111.1	>orf19.7111.1 SOD3 CGDID:CAL0006719 COORDS:Ca21chr7_C_albicans_SC5314:15982-16662W, translated using codon table 12 (206 amino acids) Verified ORF;Cytosolic manganese-containing superoxide dismutase;protection against oxidative stress;downregulated by c
1.25044	+	+		1020800000	0.000272898	orf19.2417	>orf19.2417 SMC5 CGDID:CAL0001481 COORDS:Ca21chrR_C_albicans_SC5314:702960-706181W, translated using codon table 12 (1073 amino acids) Verified ORF;Protein similar to S. cerevisiae Smc5p, which is involved in DNA repair;transposon mutation affects filame
1.90718	+	+		5132500	0.000276659	orf19.3231	>orf19.3231 CDC27 CGDID:CAL0003279 COORDS:Ca21chrR_C_albicans_SC5314:290913-288286C, translated using codon table 12 (875 amino acids) Uncharacterized ORF;Putative ubiquitin-protein ligase;periodic mRNA expression, peak at cell-cycle S/G2 phase
1.3443	+	+		353500000	0.000337593	orf19.7185	>orf19.7185 orf19.7185 CGDID:CAL0003130 COORDS:Ca21chr7_C_albicans_SC5314:867936-866479C, translated using codon table 12 (485 amino acids) Uncharacterized ORF;Ortholog of <i>C. parapsilosis CDC317</i> : CPAR2_805330, <i>Candida tenuis NRRL Y-1498</i> : C
1.34374	+	+		572790000	0.000344713	orf19.3856	>orf19.3856 CDC28 CGDID:CAL0002090 COORDS:Ca21chrR_C_albicans_SC5314:1293485-1294438W, translated using codon table 12 (317 amino acids) Verified ORF;Cyclin-dependent protein kinase, interacts with regulatory subunit Cyb1p;involved in determination of ce
1.45786	+	+		105980000	0.000347045	orf19.2389	>orf19.2389 orf19.2389 CGDID:CAL0000817 COORDS:Ca21chrR_C_albicans_SC5314:746253-745189C, translated using codon table 12 (354 amino acids) Uncharacterized ORF;Ortholog(s) have DNA replication origin binding, DNA strand annealing activity
1.2435	+	+		1532900000	0.0003866	orf19.3507	>orf19.3507 MCR1 CGDID:CAL0005780 COORDS:Ca21chr6_C_albicans_SC5314:418020-418925W, translated using codon table 12 (301 amino acids) Verified ORF;Putative NADH-cytochrome-b5 reductase;soluble protein in hyphae;biofilm induced;alkaline downregulated;k
1.24333	+	+		30600000000	0.000389874	orf19.771	>orf19.771 LPG20 CGDID:CAL0001933 COORDS:Ca21chr1_C_albicans_SC5314:984797-985843W, translated using codon table 12 (348 amino acids) Uncharacterized ORF;Aldo-keto reductase family protein;similar to aryl alcohol dehydrogenases;osmotic stress-induced, c
1.24264	+	+		4533300000	0.00040349	orf19.6257	>orf19.6257 GLT1 CGDID:CAL0000516 COORDS:Ca21chr1_C_albicans_SC5314:1398250-1404630W, translated using codon table 12 (2126 amino acids) Uncharacterized ORF;Putative glutamate synthase;alkaline downregulated;transcription is downregulated in both interm
1.62582	+			44618000	0.000430368	orf19.1598	>orf19.1598 ERG24 CGDID:CAL0005685 COORDS:Ca21chr2_C_albicans_SC5314:1914692-1913346C, translated using codon table 12 (448 amino acids) Verified ORF;C-14 sterol reductase, has a role in ergosterol biosynthesis;mutation confers increased sensitivity to d
1.87172	+			18509000	0.000456316	orf19.1357	>orf19.1357 FCY21 CGDID:CAL0003863 COORDS:Ca21chr2_C_albicans_SC5314:2034842-2036386W, translated using codon table 12 (514 amino acids) Verified ORF;High affinity, high capacity, hypoxanthine-adenine-guanine-cytosine/ H+ symporter;purine-cytosine permea
1.33232	+			645140000	0.00052231	orf19.2416.1	>orf19.2416.1 MLC1 CGDID:CAF0006950 COORDS:Ca21chrR_C_albicans_SC5314:702329-701831C, translated using codon table 12 (143 amino acids) Verified ORF;Protein with microtubule-dependent localization to the Spitzenkorper, also localizes to cytokinetic ring i
1.4407	+			147900000	0.00054775	orf19.3240	>orf19.3240 ERG27 CGDID:CAL0003306 COORDS:Ca21chrR_C_albicans_SC5314:259606-258566C, translated using codon table 12 (346 amino acids) Verified ORF;3-Keto sterol reductase of ergosterol biosynthesis;acts in C-4 sterol demethylation with Erg25p and Erg26p
1.85581	+			11240000	0.000567908	orf19.1941	>orf19.1941 NUF2 CGDID:CAL0002582 COORDS:Ca21chr5_C_albicans_SC5314:290129-288720C, translated using codon table 12 (469 amino acids) Verified ORF;Kinetochore component;amount of Nuf2p and Mtw1p protein detected at each centromere is consistent with a si
1.23444	+			858940000	0.00060179	orf19.1608	>orf19.1608 orf19.1608 CGDID:CAL0006319 COORDS:Ca21chr3_C_albicans_SC5314:516763-514997C, translated using codon table 12 (588 amino acids) Uncharacterized ORF;Ortholog(s) have cytosol, nucleus localization
1.32689	+			303710000	0.000633685	orf19.2909	>orf19.2909 ERG26 CGDID:CAL0005951 COORDS:Ca21chr4_C_albicans_SC5314:1398286-1397234C, translated using codon table 12 (350 amino acids) Verified ORF;C-3 sterol dehydrogenase, catalyzes the second of three steps required to remove two C-4 methyl groups fr
1.32414	+			618410000	0.000697946	orf19.6011	>orf19.6011 SIN3 CGDID:CAL0005043 COORDS:Ca21chr1_C_albicans_SC5314:190152-185514C, translated using codon table 12 (1411 amino acids) Verified ORF;Protein similar to S. cerevisiae Sin3p (transcriptional corepressor involved in histone deacetylase recruit
1.59687	+			86893000	0.000735335	orf19.5246	>orf19.5246 orf19.5246 CGDID:CAL0003559 COORDS:Ca21chr1_C_albicans_SC5314:2658916-2657750C, translated using codon table 12 (388 amino acids) Uncharacterized ORF;Hap43p-repressed gene
1.58818	+			42311000	0.000859965	orf19.147	>orf19.147 YAK1 CGDID:CAL0003123 COORDS:Ca21chr2_C_albicans_SC5314:979332-976903C, translated using codon table 12 (809 amino acids) Verified ORF;Predicted serine-threonine protein kinase involved in hyphal growth regulation and biofilm formation;biofilm
1.57987	+			88156000	0.00099704	orf19.1223	>orf19.1223 DBF2 CGDID:CAL0002833 COORDS:Ca21chr2_C_albicans_SC5314:1360034-1357902C, translated using codon table 12 (710 amino acids) Verified ORF;Essential serine/threonine protein kinase involved in mitotic spindle formation and cytokinesis;required
1.31273	+			334310000	0.00103488	orf19.1779	>orf19.1779 MP65 CGDID:CAL0000936 COORDS:Ca21chr2_C_albicans_SC5314:2054703-2053567C, translated using codon table 12 (378 amino acids) Verified ORF;Cell surface mannoprotein;cell-wall glucan metabolism, biofilm, adhesion;adhesin motif;O-glycosylation;
1.22263	+			2282500000	0.0010483	orf19.1618	>orf19.1618 GFA1 CGDID:CAL0006344 COORDS:Ca21chr3_C_albicans_SC5314:495612-493471C, translated using codon table 12 (713 amino acids) Verified ORF;Glucosamine-6-phosphate synthase, homotetrameric enzyme of chitin/hexosamine biosynthesis;inhibited by UDP-
1.57677	+			60488000	0.00105324	orf19.1792	>orf19.1792 orf19.1792 CGDID:CAL0000995 COORDS:Ca21chr4_C_albicans_SC5314:1162041-1164398W, translated using codon table 12 (785 amino acids) Uncharacterized ORF;Ortholog(s) have ubiquitin-protein ligase activity
1.80477	+			10549000	0.00111857	orf19.6443	>orf19.6443 orf19.6443 CGDID:CAL0002210 COORDS:Ca21chrR_C_albicans_SC5314:1872540-1871737C, translated using codon table 12 (267 amino acids) Uncharacterized ORF;Has domain(s) with predicted catalytic activity and role in metabolic process
1.30707	+			272060000	0.0012523	orf19.4212 orf19.4213	>orf19.4212 FET99 CGDID:CAL0000094 COORDS:Ca21chr6_C_albicans_SC5314:85591-83711C, translated using codon table 12 (626 amino acids) Verified ORF;Multicopper oxidase family protein similar to S. cerevisiae Fet3p;does not complement S. cerevisiae fet3 mut
1.21159	+			848060000	0.00172279	orf19.7406	>orf19.7406 orf19.7406 CGDID:CAL0005427 COORDS:Ca21chr3_C_albicans_SC5314:1428029-1425969C, translated using codon table 12 (686 amino acids) Uncharacterized ORF;Ortholog of <i>C. parapsilosis CDC317</i> : CPAR2_404490, <i>Candida tenuis NRRL Y-1498</i> :
1.76226	+			23992000	0.001913	orf19.3535	>orf19.3535 orf19.3535 CGDID:CAL0005881 COORDS:Ca21chr2_C_albicans_SC5314:1045705-1044839C, translated using codon table 12 (288 amino acids) Uncharacterized ORF;Ortholog(s) have cellular bud neck, fungal-type vacuole localization
1.38554	+			157230000	0.00214461	orf19.6010	>orf19.6010 CDC5 CGDID:CAL0005042 COORDS:Ca21chr1_C_albicans_SC5314:193411-191450C, translated using codon table 12 (653 amino acids) Verified ORF;Polo-like kinase;member of conserved Mcm1p regulon;depletion causes defects in spindle elongation and Cdc3
1.2883	+			536260000	0.0023069	orf19.6837	>orf19.6837 FMA1 CGDID:CAL0005738 COORDS:Ca21chr1_C_albicans_SC5314:918388-917556C, translated using codon table 12 (253 amino acids) Uncharacterized ORF;Protein similar to oxidoreductases;transcription is upregulated in response to treatment with ciclop
1.38062	+			131670000	0.00240417	orf19.3221	>orf19.3221 CPA2 CGDID:CAL0003247 COORDS:Ca21chrR_C_albicans_SC5314:318330-321779W, translated using codon table 12 (1149 amino acids) Uncharacterized ORF;Putative arginine-specific carbamoylphosphate synthetase;protein enriched in stationary phase yeast
4.76883	+	+	+	373730000	4.64220424746656E-317	orf19.3788	>orf19.3788 SPC34 CGDID:CAL0001301 COORDS:Ca21chr4_C_albicans_SC5314:1056829-1056086C, translated using codon table 12 (247 amino acids) Uncharacterized ORF;Subunit of the Dam1 (DASH) complex, which acts in chromosome segregation by coupling kinetochores
1.71854				24904000	0.00323652	orf19.998	>orf19.998 orf19.998 CGDID:CAL0003850 COORDS:Ca21chr1_C_albicans_SC5314:2332552-2330990C, translated using codon table 12 (520 amino acids) Uncharacterized ORF;Protein not essential for viability
1.71637				22235000	0.00331991	orf19.5727	>orf19.5727 orf19.5727 CGDID:CAL0001402 COORDS:Ca21chr6_C_albicans_SC5314:762899-762210C, translated using codon table 12 (229 amino acids) Uncharacterized ORF;Ortholog of <i>C. parapsilosis CDC317</i> : CPAR2_601230, <i>Candida tenuis NRRL Y-1498</i> : C
1.7143				13562000	0.0034011	orf19.6563.1	>orf19.6563.1 orf19.6563.1 CGDID:CAF0007084 COORDS:Ca21chr7_C_albicans_SC5314:347247-347584W, translated using codon table 12 (88 amino acids) Uncharacterized ORF;Ortholog(s) have role in mitochondrial respiratory chain complex IV assembly, negative regul
1.49691				46475000	0.00396292	orf19.3449	>orf19.3449 orf19.3449 CGDID:CAL0004998 COORDS:Ca21chr6_C_albicans_SC5314:268193-270313W, translated using codon table 12 (706 amino acids) Uncharacterized ORF;Ortholog(s) have cytoplasm, ribosome localization
1.69606				21965000	0.00419833	orf19.3939	>orf19.3939 orf19.3939 CGDID:CAL0002949 COORDS:Ca21chr5_C_albicans_SC5314:991305-992213W, translated using codon table 12 (302 amino acids) Uncharacterized ORF;Ortholog(s) have role in protein folding in endoplasmic reticulum, regulation of mitotic cell c
1.68203				23550000	0.00492094	orf19.177	>orf19.177 orf19.177 CGDID:CAL0003220 COORDS:Ca21chr1_C_albicans_SC5314:1337672-1340068W, translated using codon table 12 (798 amino acids) Uncharacterized ORF;Has domain(s) with predicted phosphatidylinositol binding activity and role in cell communicati
1.18483				2360200000	0.00525989	orf19.4427	>orf19.4427 SKP1 CGDID:CAL0001786 COORDS:Ca21chr1_C_albicans_SC5314:1605009-1604515C, translated using codon table 12 (164 amino acids) Uncharacterized ORF;Putative subunit D of kinetochore protein complex CBF3;regulated by Gcn4p;repressed in response t
1.34185				176910000	0.00566441	orf19.1865	>orf19.1865 orf19.1865 CGDID:CAL0001732 COORDS:Ca21chr2_C_albicans_SC5314:1551800-1549956C, translated using codon table 12 (614 amino acids) Uncharacterized ORF;Ortholog(s) have role in reciprocal meiotic recombination and cytosol, endoplasmic reticulum,
1.66566				31984000	0.00590182	orf19.3603	>orf19.3603 orf19.3603 CGDID:CAL0000273 COORDS:Ca21chr2_C_albicans_SC5314:1774591-1776867W, translated using codon table 12 (758 amino acids) Uncharacterized ORF;Ortholog(s) have cytoplasm, nucleus localization
1.18174				827200000	0.00593591	orf19.3962	>orf19.3962 HAS1 CGDID:CAL0003050 COORDS:Ca21chr5_C_albicans_SC5314:1034421-1032724C, translated using codon table 12 (565 amino acids) Verified ORF;Functional homolog of S. cerevisiae Has1p, which is a nucleolar protein of the DEAD-box ATP-dependent RNA
1.1806				1036700000	0.00620245	orf19.7297	>orf19.7297 orf19.7297 CGDID:CAL0004025 COORDS:Ca21chrR_C_albicans_SC5314:1926092-1924941C, translated using codon table 12 (383 amino acids) Uncharacterized ORF;Putative cystathionine gamma-synthase;decreased levels in stationary phase cultures;Hog1p-i
1.18017				1443600000	0.00630812	orf19.3799	>orf19.3799 orf19.3799 CGDID:CAL0001315 COORDS:Ca21chr4_C_albicans_SC5314:1033344-1034444W, translated using codon table 12 (366 amino acids) Uncharacterized ORF;Ortholog(s) have role in endoplasmic reticulum tubular network maintenance, nuclear pore comp
1.25455				416100000	0.00636197	orf19.5517	>orf19.5517 orf19.5517 CGDID:CAL0006095 COORDS:Ca21chr6_C_albicans_SC5314:514411-515520W, translated using codon table 12 (369 amino acids) Uncharacterized ORF;Similar to alcohol dehydrogenases;increased transcription is observed upon benomyl treatment;
1.25426				259900000	0.0064146	orf19.813	>orf19.813 orf19.813 CGDID:CAL0002644 COORDS:Ca21chr2_C_albicans_SC5314:858692-860770W, translated using codon table 12 (692 amino acids) Uncharacterized ORF;Similar to S. cerevisiae Vhs3p, a putative phosphopantothenoylcysteine decarboxylase;not essenti
1.25334				693270000	0.00658543	orf19.6724	>orf19.6724 FUM12 CGDID:CAL0004792 COORDS:Ca21chr3_C_albicans_SC5314:1743277-1741745C, translated using codon table 12 (510 amino acids) Uncharacterized ORF;Putative fumarate hydratase, enzyme of citric acid cycle;fluconazole-downregulated;downregulated
1.65337				14570000	0.00674932	orf19.1723	>orf19.1723 orf19.1723 CGDID:CAL0000804 COORDS:Ca21chr3_C_albicans_SC5314:274598-275266W, translated using codon table 12 (222 amino acids) Uncharacterized ORF;Ortholog(s) have role in response to purine-containing compound and cytoplasm, nucleus localiza
1.17637				2525600000	0.00729602	orf19.5989	>orf19.5989 orf19.5989 CGDID:CAL0003460 COORDS:Ca21chr3_C_albicans_SC5314:1103543-1104970W, translated using codon table 12 (475 amino acids) Uncharacterized ORF;Ortholog(s) have mRNA binding activity, role in mRNA cleavage, mRNA polyadenylation and cytop
1.64465				5787500	0.00741359	orf19.2236	>orf19.2236 FHL1 CGDID:CAL0006246 COORDS:Ca21chr2_C_albicans_SC5314:1401601-1398143C, translated using codon table 12 (1152 amino acids) Verified ORF;Transcription factor that forms a heterodimer with Ifh1p that is tethered to promoters by Tbf1p;positive
1.17416				805750000	0.00793115	orf19.2770.1	>orf19.2770.1 SOD1 CGDID:CAL0006717 COORDS:Ca21chr4_C_albicans_SC5314:461741-461032C, translated using codon table 12 (154 amino acids) Verified ORF;Cytosolic copper- and zinc-containing superoxide dismutase, involved in protection from oxidative stress a
1.2464				513880000	0.00799915	orf19.3618	>orf19.3618 YWP1 CGDID:CAL0000321 COORDS:Ca21chr2_C_albicans_SC5314:1747033-1748634W, translated using codon table 12 (533 amino acids) Verified ORF;Secreted yeast cell wall protein;possible role in dispersal in host;mutation causes increased adhesion a
1.44866				72524000	0.00815886	orf19.1911	>orf19.1911 PGA52 CGDID:CAL0002515 COORDS:Ca21chr2_C_albicans_SC5314:14415-13261C, translated using codon table 12 (384 amino acids) Verified ORF;GPI-anchored cell surface protein of unknown function;Hap43p-repressed gene;fluconazole-induced;possibly a
1.32309				121820000	0.00834754	orf19.5799	>orf19.5799 orf19.5799 CGDID:CAL0001560 COORDS:Ca21chr2_C_albicans_SC5314:608308-606248C, translated using codon table 12 (686 amino acids) Uncharacterized ORF;Ortholog(s) have cytoplasm localization
1.32253				159720000	0.00844151	orf19.955	>orf19.955 orf19.955 CGDID:CAL0003715 COORDS:Ca21chr5_C_albicans_SC5314:63667-64644W, translated using codon table 12 (325 amino acids) Uncharacterized ORF;Ortholog of <i>C. parapsilosis CDC317</i> : CPAR2_304150, <i>Candida tenuis NRRL Y-1498</i> : CANTE
1.63062				8158300	0.0086047	orf19.330.1	>orf19.330.1 RUB1 CGDID:CAF0006894 COORDS:Ca21chr3_C_albicans_SC5314:699417-699650W, translated using codon table 12 (77 amino acids) Verified ORF;Ubiquitin-related protein with similarity to mammalian NEDD8;reversible conjugation (neddylation) of the cu
1.44442				42919000	0.00866968	orf19.6021	>orf19.6021 IHD2 CGDID:CAL0005068 COORDS:Ca21chr1_C_albicans_SC5314:167084-167830W, translated using codon table 12 (248 amino acids) Uncharacterized ORF;Transcriptionally regulated by iron and by yeast-hyphal switching;expression greater in low iron
1.62927				8648800	0.00872761	orf19.5275	>orf19.5275 orf19.5275 CGDID:CAL0003620 COORDS:Ca21chr1_C_albicans_SC5314:2607454-2608677W, translated using codon table 12 (407 amino acids) Uncharacterized ORF;Ortholog(s) have ATPase activator activity and role in late endosome to vacuole transport via
1.32005				227140000	0.00887362	orf19.4025	>orf19.4025 PRE1 CGDID:CAL0004727 COORDS:Ca21chr5_C_albicans_SC5314:1152595-1153185W, translated using codon table 12 (196 amino acids) Uncharacterized ORF;Putative beta 4 subunit of the 20S proteasome;upregulated by Rim101p at acid pH;flucytosine induc
1.17012				1214900000	0.00921654	orf19.6994	>orf19.6994 BAT22 CGDID:CAL0000414 COORDS:Ca21chr3_C_albicans_SC5314:1251796-1250687C, translated using codon table 12 (369 amino acids) Verified ORF;Putative branched chain amino acid aminotransferase;regulated by Gcn4p;induced by farnesol treatment, G
1.16946				1106500000	0.00944533	orf19.7350	>orf19.7350 RCT1 CGDID:CAL0004665 COORDS:Ca21chr3_C_albicans_SC5314:1279189-1279764W, translated using codon table 12 (191 amino acids) Verified ORF;Fluconazole-induced protein;elevated mRNA levels in a cyr1 or ras1 null mutant and decreased mRNA abundan
1.42987				39253000	0.0106398	orf19.5921	>orf19.5921 orf19.5921 CGDID:CAL0003297 COORDS:Ca21chr3_C_albicans_SC5314:980598-981689W, translated using codon table 12 (363 amino acids) Uncharacterized ORF;Ortholog of <i>C. parapsilosis CDC317</i> : CPAR2_404290, <i>Candida tenuis NRRL Y-1498</i> : C
1.42983				74902000	0.0106456	orf19.837	>orf19.837 GNA1 CGDID:CAL0002717 COORDS:Ca21chr2_C_albicans_SC5314:811096-811545W, translated using codon table 12 (149 amino acids) Verified ORF;Glucosamine-6-phosphate acetyltransferase;enzyme of UDP-GlcNAc biosynthesis;required for viability in absen
1.23544				428350000	0.0107789	orf19.6938	>orf19.6938 MEU1 CGDID:CAL0000248 COORDS:Ca21chr3_C_albicans_SC5314:794873-795907W, translated using codon table 12 (344 amino acids) Uncharacterized ORF;Putative methylthioadenosine phosphorylase;protein level decreases in stationary phase cultures
1.42579				47572000	0.0112581	orf19.4615	>orf19.4615 orf19.4615 CGDID:CAL0003615 COORDS:Ca21chr4_C_albicans_SC5314:351044-350088C, translated using codon table 12 (318 amino acids) Uncharacterized ORF;Ortholog(s) have histone deacetylase activity
1.30796				105840000	0.0112668	orf19.5961	>orf19.5961 orf19.5961 CGDID:CAL0003397 COORDS:Ca21chr3_C_albicans_SC5314:1060429-1059680C, translated using codon table 12 (249 amino acids) Uncharacterized ORF;Ortholog(s) have role in proteasome regulatory particle assembly, proteolysis and cytosol, nu
1.16367				3430000000	0.0116509	orf19.5682	>orf19.5682 orf19.5682 CGDID:CAL0000730 COORDS:Ca21chr5_C_albicans_SC5314:18029-16398C, translated using codon table 12 (543 amino acids) Uncharacterized ORF;Ortholog(s) have protein binding, bridging, protein transporter activity
1.16317				1160300000	0.0118615	orf19.1674	>orf19.1674 CDC53 CGDID:CAL0000107 COORDS:Ca21chr3_C_albicans_SC5314:367386-369644W, translated using codon table 12 (752 amino acids) Verified ORF;Cullin, a scaffold subunit of the SCF ubiquitin-ligase complexes;depletion leads to increased filamentous
1.59829				21094000	0.0120048	orf19.3266	>orf19.3266 orf19.3266 CGDID:CAL0003367 COORDS:Ca21chrR_C_albicans_SC5314:200129-201214W, translated using codon table 12 (361 amino acids) Uncharacterized ORF;Ortholog of <i>C. parapsilosis CDC317</i> : CPAR2_800910, <i>Candida tenuis NRRL Y-1498</i> : C
1.16057				6700300000	0.0130089	orf19.5177 orf19.1596	>orf19.5177 orf19.5177 CGDID:CAL0002664 COORDS:Ca21chr7_C_albicans_SC5314:614946-616880W, translated using codon table 12 (644 amino acids) Uncharacterized ORF;Ortholog of <i>Candida albicans WO-1</i> : CAWG_05627
1.15993				48000000000	0.0133088	orf19.171	>orf19.171 DBP2 CGDID:CAL0003204 COORDS:Ca21chrR_C_albicans_SC5314:561933-564684W, translated using codon table 12 (562 amino acids) Uncharacterized ORF;Putative DEAD-box family ATP-dependent RNA helicase;flucytosine induced;downregulated in core stress
1.1598				3019800000	0.013366	orf19.850	>orf19.850 orf19.850 CGDID:CAL0002774 COORDS:Ca21chr2_C_albicans_SC5314:782312-783436W, translated using codon table 12 (374 amino acids) Uncharacterized ORF;Ortholog(s) have protein-N-terminal asparagine amidohydrolase activity, role in cellular protein
1.41252				49014000	0.0134888	orf19.2896	>orf19.2896 SOU1 CGDID:CAL0005253 COORDS:Ca21chr4_C_albicans_SC5314:1418888-1419733W, translated using codon table 12 (281 amino acids) Verified ORF;Enzyme involved in utilization of L-sorbose;has sorbitol dehydrogenase, fructose reductase, and sorbose r
1.2965				117160000	0.0140343	orf19.2346	>orf19.2346 orf19.2346 CGDID:CAL0000742 COORDS:Ca21chr1_C_albicans_SC5314:2381550-2383424W, translated using codon table 12 (624 amino acids) Uncharacterized ORF;Putative protein of unknown function, transcription is positively regulated by Tbf1p
1.15787				807310000	0.0142997	orf19.3916	>orf19.3916 orf19.3916 CGDID:CAL0002866 COORDS:Ca21chr5_C_albicans_SC5314:956373-957956W, translated using codon table 12 (527 amino acids) Uncharacterized ORF;Ortholog of <i>C. parapsilosis CDC317</i> : CPAR2_100980, <i>Debaryomyces hansenii CBS767</i> :
1.40442				40437000	0.0150306	orf19.4161	>orf19.4161 orf19.4161 CGDID:CAL0005775 COORDS:Ca21chr4_C_albicans_SC5314:142987-144102W, translated using codon table 12 (371 amino acids) Uncharacterized ORF;Ortholog(s) have role in DNA repair and Smc5-Smc6 complex, nucleus localization
1.57419				11647000	0.0152464	orf19.4341	>orf19.4341 orf19.4341 CGDID:CAL0001012 COORDS:Ca21chr5_C_albicans_SC5314:691336-692784W, translated using codon table 12 (482 amino acids) Uncharacterized ORF;Ortholog(s) have GPI-anchor transamidase complex localization
1.2218				305980000	0.0153833	orf19.6568	>orf19.6568 SMC6 CGDID:CAL0003255 COORDS:Ca21chr7_C_albicans_SC5314:340592-343978W, translated using codon table 12 (1128 amino acids) Uncharacterized ORF;Putative structural maintenance of chromosomes (SMC) protein;Hap43p-induced gene;cell-cycle regula
1.29002				224730000	0.0158439	orf19.3952	>orf19.3952 orf19.3952 CGDID:CAL0003010 COORDS:Ca21chr5_C_albicans_SC5314:1013452-1015059W, translated using codon table 12 (535 amino acids) Uncharacterized ORF;Ortholog(s) have GTP binding, signal recognition particle binding activity, role in protein t
1.15457				3683600000	0.0160275	orf19.5779	>orf19.5779 RNR1 CGDID:CAL0001524 COORDS:Ca21chr2_C_albicans_SC5314:642004-639440C, translated using codon table 12 (854 amino acids) Verified ORF;Ribonucleotide reductase large subunit;expression greater in low iron;transposon mutation affects filament
1.56881				5339700	0.0160649	orf19.5391	>orf19.5391 orf19.5391 CGDID:CAL0004426 COORDS:Ca21chr3_C_albicans_SC5314:109085-112744W, translated using codon table 12 (1219 amino acids) Uncharacterized ORF;Hap43p-induced gene
1.39502				53925000	0.0170071	orf19.1964	>orf19.1964 orf19.1964 CGDID:CAL0002636 COORDS:Ca21chr5_C_albicans_SC5314:227465-225963C, translated using codon table 12 (500 amino acids) Uncharacterized ORF;Putative protein of unknown function;downregulated upon fluphenazine treatment;upregulated up
1.21625				288970000	0.017695	orf19.4909	>orf19.4909 CBK1 CGDID:CAL0006211 COORDS:Ca21chr1_C_albicans_SC5314:2299136-2296938C, translated using codon table 12 (732 amino acids) Verified ORF;Ser/Thr kinase of cell wall integrity pathway;mutants show abnormal morphology and aggregation;Mob2p ass
1.38997				36120000	0.018157	orf19.4316	>orf19.4316 orf19.4316 CGDID:CAL0000924 COORDS:Ca21chr5_C_albicans_SC5314:648551-649741W, translated using codon table 12 (396 amino acids) Verified ORF;Trimethyllysine dioxygenase, the first enzyme in the carnitine biosynthesis pathway;hyphal-induced ex
1.38752				73487000	0.0187395	orf19.1991	>orf19.1991 orf19.1991 CGDID:CAL0002738 COORDS:Ca21chr2_C_albicans_SC5314:230504-232237W, translated using codon table 12 (577 amino acids) Uncharacterized ORF;Ortholog(s) have cytoplasm localization
1.27893				231470000	0.0194076	orf19.5005	>orf19.5005 OSM2 CGDID:CAL0001569 COORDS:Ca21chr1_C_albicans_SC5314:3006473-3008419W, translated using codon table 12 (648 amino acids) Uncharacterized ORF;Putative mitochondrial fumarate reductase;regulated by Ssn6p, Gcn2p, and Gcn4p;Hog1p-downregulate
1.54441				1495800	0.0202668	orf19.4736	>orf19.4736 orf19.4736 CGDID:CAL0004429 COORDS:Ca21chr1_C_albicans_SC5314:1912123-1913778W, translated using codon table 12 (551 amino acids) Uncharacterized ORF;Ortholog(s) have alkaline phosphatase activity, nucleotide phosphatase activity, role in nico
1.54355				28798000	0.0204305	orf19.846	>orf19.846 orf19.846 CGDID:CAL0002752 COORDS:Ca21chr2_C_albicans_SC5314:795282-792391C, translated using codon table 12 (963 amino acids) Uncharacterized ORF;Predicted ORF in Assemblies 19, 20 and 21;transcriptionally activated by Mnl1p under weak acid s
1.27506				136030000	0.0207991	orf19.399	>orf19.399 orf19.399 CGDID:CAL0004967 COORDS:Ca21chr1_C_albicans_SC5314:1870656-1868518C, translated using codon table 12 (712 amino acids) Uncharacterized ORF;Putative serine/threonine protein kinase;possibly an essential gene, disruptants not obtained
1.37743				73222000	0.0213077	orf19.6445	>orf19.6445 ECI1 CGDID:CAL0002213 COORDS:Ca21chrR_C_albicans_SC5314:1875847-1874930C, translated using codon table 12 (305 amino acids) Verified ORF;Protein similar to S. cerevisiae Eci1p, which is involved in fatty acid oxidation;transposon mutation aff
1.20869				325520000	0.0213116	orf19.6640	>orf19.6640 TPS1 CGDID:CAL0004028 COORDS:Ca21chrR_C_albicans_SC5314:1213719-1215155W, translated using codon table 12 (478 amino acids) Verified ORF;Trehalose-6-phosphate synthase;role in hyphal growth and virulence in mouse systemic infection;upregulat
1.27361				94550000	0.0213421	orf19.2278	>orf19.2278 orf19.2278 CGDID:CAL0006349 COORDS:Ca21chr2_C_albicans_SC5314:1472371-1473165W, translated using codon table 12 (264 amino acids) Uncharacterized ORF;Putative 20S proteasome assembly protein;filament induced;transcription is induced in respo
1.20843				281720000	0.0214479	orf19.539	>orf19.539 LAP3 CGDID:CAL0000177 COORDS:Ca21chrR_C_albicans_SC5314:990430-988901C, translated using codon table 12 (509 amino acids) Uncharacterized ORF;Putative aminopeptidase;transcription positively regulated by Sfu1p;transcription repressed by alpha
1.14574				1661900000	0.0215496	orf19.939	>orf19.939 NAM7 CGDID:CAL0003666 COORDS:Ca21chr5_C_albicans_SC5314:95043-98102W, translated using codon table 12 (1019 amino acids) Uncharacterized ORF;Putative role in nonsense-mediated mRNA decay;similar to S. cerevisiae Nam7p;gene induced by ciclopir
1.14388				1641700000	0.022901	orf19.6757	>orf19.6757 GCY1 CGDID:CAL0004896 COORDS:Ca21chr3_C_albicans_SC5314:1689011-1689898W, translated using codon table 12 (295 amino acids) Verified ORF;Possible aldo/keto reductase;mutation confers hypersensitivity to toxic ergosterol analog;farnesol-downr
1.36949				47544000	0.0235311	orf19.5833	>orf19.5833 orf19.5833 CGDID:CAL0002326 COORDS:Ca21chr2_C_albicans_SC5314:545705-546796W, translated using codon table 12 (363 amino acids) Uncharacterized ORF;Ortholog(s) have polyubiquitin binding activity and role in ER-associated misfolded protein cat
1.36458				47954000	0.0249982	orf19.7214	>orf19.7214 orf19.7214 CGDID:CAL0003768 COORDS:Ca21chr1_C_albicans_SC5314:3097299-3098807W, translated using codon table 12 (502 amino acids) Uncharacterized ORF;Putative glucan 1,3-beta-glucosidase;regulated by Nrg1p, Tup1p and possibly Tac1p;induced u
1.5184				8226800	0.0257365	orf19.6012	>orf19.6012 orf19.6012 CGDID:CAL0005044 COORDS:Ca21chr1_C_albicans_SC5314:181410-185246W, translated using codon table 12 (1278 amino acids) Uncharacterized ORF;Ortholog(s) have cell division site, cell tip, cytosol localization
1.51704				16603000	0.026055	orf19.6195	>orf19.6195 orf19.6195 CGDID:CAL0006149 COORDS:Ca21chr1_C_albicans_SC5314:1516388-1514154C, translated using codon table 12 (744 amino acids) Uncharacterized ORF;Ortholog(s) have 3-5-exoribonuclease activity
1.51661				11728000	0.0261555	orf19.3083	>orf19.3083 orf19.3083 CGDID:CAL0001501 COORDS:Ca21chr4_C_albicans_SC5314:1589817-1588615C, translated using codon table 12 (400 amino acids) Uncharacterized ORF;Ortholog(s) have role in DNA repair, actin cytoskeleton organization, cellular manganese ion
1.36061				42410000	0.0262431	orf19.540	>orf19.540 orf19.540 CGDID:CAL0000194 COORDS:Ca21chrR_C_albicans_SC5314:991762-990812C, translated using codon table 12 (316 amino acids) Uncharacterized ORF;Has domain(s) with predicted palmitoyl-(protein) hydrolase activity and role in cellular protein
1.13793				22100000000	0.0277043	orf19.6190	>orf19.6190 SRB1 CGDID:CAL0006140 COORDS:Ca21chr3_C_albicans_SC5314:1786285-1785197C, translated using codon table 12 (362 amino acids) Verified ORF;Essential GDP-mannose pyrophosphorylase;synthesizes GDP-mannose for protein glycosylation;functional hom
1.35579				59339000	0.0278245	orf19.1974	>orf19.1974 TFS1 CGDID:CAL0002671 COORDS:Ca21chr5_C_albicans_SC5314:213880-213101C, translated using codon table 12 (259 amino acids) Uncharacterized ORF;Putative carboxypeptidase y inhibitor;transcription is regulated upon yeast-hyphal switch;shows col
1.35521				43216000	0.0280181	orf19.7362	>orf19.7362 SKN1 CGDID:CAL0004709 COORDS:Ca21chr3_C_albicans_SC5314:1302586-1300373C, translated using codon table 12 (737 amino acids) Uncharacterized ORF;Protein with predicted role in beta-1,6-glucan synthesis;probable N-glycosylated type II membrane
1.19448				260860000	0.0298062	orf19.4127	>orf19.4127 orf19.4127 CGDID:CAL0005635 COORDS:Ca21chr2_C_albicans_SC5314:1014567-1013161C, translated using codon table 12 (442 amino acids) Uncharacterized ORF;Ortholog(s) have actin filament binding activity, role in actin cortical patch localization,
1.34752				47412000	0.0307194	orf19.3592	>orf19.3592 JEM1 CGDID:CAL0006020 COORDS:Ca21chr2_C_albicans_SC5314:1786043-1787953W, translated using codon table 12 (636 amino acids) Verified ORF;Functional homolog of S. cerevisiae Jem1p, which acts with Scj1p and Kar2p (BiP) in protein folding and ER
1.25234				188970000	0.0308023	orf19.6591	>orf19.6591 orf19.6591 CGDID:CAL0003330 COORDS:Ca21chrR_C_albicans_SC5314:2066600-2067778W, translated using codon table 12 (392 amino acids) Uncharacterized ORF;Ortholog(s) have pyrophosphatase activity and peroxisome localization
1.13414				2640700000	0.0311782	orf19.4309	>orf19.4309 GRP2 CGDID:CAL0000895 COORDS:Ca21chr5_C_albicans_SC5314:640030-639005C, translated using codon table 12 (341 amino acids) Verified ORF;Methylglyoxal reductase;regulation associated with azole resistance;induced in core stress response or by
1.2496				101950000	0.0322407	orf19.4897	>orf19.4897 orf19.4897 CGDID:CAL0005528 COORDS:Ca21chr1_C_albicans_SC5314:2268407-2267445C, translated using codon table 12 (320 amino acids) Uncharacterized ORF;Ortholog(s) have phosphatidylinositol transporter activity, role in phospholipid transport an
1.18989				357620000	0.0330945	orf19.7658	>orf19.7658 RFC4 CGDID:CAL0000922 COORDS:Ca21chrR_C_albicans_SC5314:2266570-2267541W, translated using codon table 12 (323 amino acids) Uncharacterized ORF;Putative heteropentameric replication factor C subunit;flucytosine induced;periodic mRNA expressi
1.24761				143500000	0.0333198	orf19.3150	>orf19.3150 GRE2 CGDID:CAL0002333 COORDS:Ca21chr2_C_albicans_SC5314:1376462-1377499W, translated using codon table 12 (345 amino acids) Verified ORF;Putative reductase;Nrg1p- and Tup1p-regulated;benomyl- and hyphal-induced;macrophage/pseudohyphal-repre
1.48898				6602700	0.0333618	orf19.1224	>orf19.1224 FRP3 CGDID:CAL0002835 COORDS:Ca21chr2_C_albicans_SC5314:1365218-1366075W, translated using codon table 12 (285 amino acids) Verified ORF;Putative ammonium transporter;upregulated in the presence of human neutrophils;fluconazole-downregulated
1.1894				579040000	0.0334583	orf19.5544	>orf19.5544 SAC6 CGDID:CAL0006165 COORDS:Ca21chr6_C_albicans_SC5314:564471-566414W, translated using codon table 12 (647 amino acids) Uncharacterized ORF;Actin filament bundling protein, fimbrin;transcription is regulated by Nrg1p and Mig1p;protein leve
1.13062				26400000000	0.0347138	orf19.2803	>orf19.2803 HEM13 CGDID:CAL0005027 COORDS:Ca21chr3_C_albicans_SC5314:847275-846304C, translated using codon table 12 (323 amino acids) Verified ORF;Coproporphyrinogen III oxidase;antigenic;localizes to yeast cell surface, not hyphae;iron-regulated expr
1.33682				57218000	0.0348276	orf19.6374	>orf19.6374 orf19.6374 CGDID:CAL0001381 COORDS:Ca21chrR_C_albicans_SC5314:1770183-1771313W, translated using codon table 12 (376 amino acids) Uncharacterized ORF;Ortholog(s) have unfolded protein binding activity, role in mitochondrial proton-transporting
1.48376				18293000	0.0348914	orf19.4747	>orf19.4747 HEM14 CGDID:CAL0004457 COORDS:Ca21chr1_C_albicans_SC5314:1931411-1933006W, translated using codon table 12 (531 amino acids) Uncharacterized ORF;Putative protoporphyrinogen oxidase involved in heme biosynthesis;predicted Kex2p substrate;tran
1.483				4815700	0.0351204	orf19.2242	>orf19.2242 PRB1 CGDID:CAL0006263 COORDS:Ca21chr2_C_albicans_SC5314:1415365-1413968C, translated using codon table 12 (465 amino acids) Uncharacterized ORF;Endoprotease B;regulated by heat, carbon source (GlcNAc-induced), nitrogen, macrophage response, h
1.33607				63018000	0.0351352	orf19.2887	>orf19.2887 orf19.2887 CGDID:CAL0005225 COORDS:Ca21chr4_C_albicans_SC5314:1436372-1436986W, translated using codon table 12 (204 amino acids) Uncharacterized ORF;Ortholog(s) have cellular bud, mating projection tip, ribosome localization
1.33393				56570000	0.0360143	orf19.7413	>orf19.7413 MMS21 CGDID:CAL0005456 COORDS:Ca21chr3_C_albicans_SC5314:1416935-1416117C, translated using codon table 12 (272 amino acids) Uncharacterized ORF;Putative MMS21-SMC5-SMC6 complex component
1.24145				109080000	0.0368511	orf19.2673	>orf19.2673 orf19.2673 CGDID:CAL0003512 COORDS:Ca21chr4_C_albicans_SC5314:665708-666727W, translated using codon table 12 (339 amino acids) Uncharacterized ORF;Ortholog(s) have role in DNA repair and Smc5-Smc6 complex, cytoplasm, nucleus localization
1.12749				938330000	0.038139	orf19.6507	>orf19.6507 orf19.6507 CGDID:CAL0003041 COORDS:Ca21chr7_C_albicans_SC5314:463558-464782W, translated using codon table 12 (387 amino acids) Uncharacterized ORF;Stationary phase enriched protein
1.12702				919190000	0.0386725	orf19.7011	>orf19.7011 orf19.7011 CGDID:CAL0001929 COORDS:Ca21chr7_C_albicans_SC5314:218578-214925C, translated using codon table 12 (1217 amino acids) Uncharacterized ORF;Ortholog(s) have 90S preribosome, nucleus, spindle pole body localization
1.12684				1062700000	0.0388896	orf19.1649	>orf19.1649 RNA1 CGDID:CAL0000022 COORDS:Ca21chr3_C_albicans_SC5314:436239-437483W, translated using codon table 12 (414 amino acids) Uncharacterized ORF;Putative GTPase-activating protein;protein level decreases in stationary phase cultures
1.46836				26530000	0.0397452	orf19.6554	>orf19.6554 orf19.6554 CGDID:CAL0003212 COORDS:Ca21chr7_C_albicans_SC5314:370382-371209W, translated using codon table 12 (275 amino acids) Uncharacterized ORF;Hap43p-repressed gene;expression upregulated by ketoconazole, by hypoxia and during growth in
1.46723				9472000	0.040122	orf19.4715	>orf19.4715 orf19.4715 CGDID:CAL0004372 COORDS:Ca21chr4_C_albicans_SC5314:1364687-1376167W, translated using codon table 12 (3826 amino acids) Uncharacterized ORF;Ortholog(s) have tubulin binding activity, role in microtubule cytoskeleton organization, mi
1.46493				4276100	0.0408964	orf19.2097	>orf19.2097 orf19.2097 CGDID:CAL0004569 COORDS:Ca21chr2_C_albicans_SC5314:44288-47542W, translated using codon table 12 (1084 amino acids) Uncharacterized ORF;Ortholog(s) have DNA-dependent ATPase activity, Y-form DNA binding, four-way junction DNA bindin
1.23396				129040000	0.0415508	orf19.2347	>orf19.2347 MNN2 CGDID:CAL0000743 COORDS:Ca21chr1_C_albicans_SC5314:2380617-2378824C, translated using codon table 12 (597 amino acids) Verified ORF;Alpha-1,2-mannosyltransferase;likely involved in iron utilization in the endocytosis pathway under iron-l
1.12443				1145700000	0.0417458	orf19.4157	>orf19.4157 SPS20 CGDID:CAL0005754 COORDS:Ca21chr4_C_albicans_SC5314:148176-149048W, translated using codon table 12 (290 amino acids) Uncharacterized ORF;Peroxisomal 2,4-dienoyl-CoA reductase;stationary phase enriched protein
1.2324				220860000	0.0425839	orf19.4066	>orf19.4066 orf19.4066 CGDID:CAL0004879 COORDS:Ca21chr2_C_albicans_SC5314:1856793-1854382C, translated using codon table 12 (803 amino acids) Uncharacterized ORF;Predicted ORF in Assemblies 19, 20 and 21;Hog1p-downregulated
1.45796				24383000	0.0433219	orf19.6838	>orf19.6838 orf19.6838 CGDID:CAL0005741 COORDS:Ca21chr1_C_albicans_SC5314:919619-918810C, translated using codon table 12 (269 amino acids) Uncharacterized ORF;Putative protein of unknown function, transcription is upregulated in clinical isolates from HI
1.17645				302890000	0.0444522	orf19.1267	>orf19.1267 orf19.1267 CGDID:CAL0002990 COORDS:Ca21chr4_C_albicans_SC5314:1288486-1289871W, translated using codon table 12 (461 amino acids) Uncharacterized ORF;Has domain(s) with predicted heat shock protein binding, unfolded protein binding activity an
1.45367				7880900	0.0448727	orf19.4478	>orf19.4478 orf19.4478 CGDID:CAL0001963 COORDS:Ca21chr1_C_albicans_SC5314:846723-848819W, translated using codon table 12 (698 amino acids) Uncharacterized ORF;Ortholog(s) have aspartate-tRNA ligase activity, role in mitochondrial aspartyl-tRNA aminoacyla
1.17563				269310000	0.0452367	orf19.3873	>orf19.3873 ARC40 CGDID:CAL0002151 COORDS:Ca21chrR_C_albicans_SC5314:1322922-1324076W, translated using codon table 12 (384 amino acids) Verified ORF;Protein similar to S. cerevisiae Arc40p, which is involved in actin filament organization in S. cerevisia
1.31269				43173000	0.0457712	orf19.6013	>orf19.6013 orf19.6013 CGDID:CAL0005045 COORDS:Ca21chr1_C_albicans_SC5314:179830-180836W, translated using codon table 12 (252 amino acids) Uncharacterized ORF;Ortholog(s) have cytosol, nucleolus localization
1.17411				283210000	0.0467162	orf19.7421	>orf19.7421 CYP5 CGDID:CAL0005487 COORDS:Ca21chr3_C_albicans_SC5314:1455477-1454866C, translated using codon table 12 (203 amino acids) Verified ORF;Putative peptidyl-prolyl cis-trans isomerase;macrophage-downregulated protein level;protein level decrea
1.12009				2873200000	0.0473371	orf19.3442	>orf19.3442 orf19.3442 CGDID:CAL0004987 COORDS:Ca21chr6_C_albicans_SC5314:284006-282765C, translated using codon table 12 (413 amino acids) Uncharacterized ORF;Hap43p-repressed gene
1.30932				52243000	0.0474948	orf19.3737	>orf19.3737 orf19.3737 CGDID:CAL0001179 COORDS:Ca21chrR_C_albicans_SC5314:514916-512535C, translated using codon table 12 (793 amino acids) Uncharacterized ORF;Hap43p-repressed gene;transcription is downregulated in response to treatment with ciclopirox
1.22444				169840000	0.0482108	orf19.7258	>orf19.7258 DDI1 CGDID:CAL0003905 COORDS:Ca21chr1_C_albicans_SC5314:3170037-3171008W, translated using codon table 12 (323 amino acids) Uncharacterized ORF;Putative DNA damage inducible v-SNARE binding protein;macrophage/pseudohyphal-repressed
1.30694				36827000	0.048748	orf19.5999	>orf19.5999 DYN1 CGDID:CAL0003475 COORDS:Ca21chr3_C_albicans_SC5314:1143879-1131394C, translated using codon table 12 (4161 amino acids) Verified ORF;Dynein heavy chain, a motor protein that moves toward the microtubule minus end;required for wild-type y
1.11826				9106200000	0.0498636	orf19.3014	>orf19.3014 BMH1 CGDID:CAL0001346 COORDS:Ca21chr1_C_albicans_SC5314:675939-675145C, translated using codon table 12 (264 amino acids) Verified ORF;Sole 14-3-3 protein in C. albicans;role in hyphal growth;possibly regulated by host interaction;localizes
1.30421				48823000	0.0502162	orf19.3237	>orf19.3237 orf19.3237 CGDID:CAL0003293 COORDS:Ca21chrR_C_albicans_SC5314:269863-274998W, translated using codon table 12 (1711 amino acids) Uncharacterized ORF;Ortholog(s) have cytosol, mitochondrion, nucleus localization
1.11784				3307500000	0.0504561	orf19.5591	>orf19.5591 ADO1 CGDID:CAL0006279 COORDS:Ca21chr6_C_albicans_SC5314:647819-646776C, translated using codon table 12 (347 amino acids) Verified ORF;Adenosine kinase;heterozygous null mutant exhibits resistance to cordycepin in the C. albicans fitness test
1.16969				437630000	0.0512518	orf19.6081 orf19.3829	>orf19.6081 PHR2 CGDID:CAL0005209 COORDS:Ca21chr1_C_albicans_SC5314:37852-39486W, translated using codon table 12 (544 amino acids) Verified ORF;Glycosidase;role in cell wall structure;may act on beta-1,3-glucan prior to beta-1,6-glucan linkage;role in
1.43243				8811100	0.0532139	orf19.1668	>orf19.1668 orf19.1668 CGDID:CAL0000074 COORDS:Ca21chr3_C_albicans_SC5314:390089-388218C, translated using codon table 12 (623 amino acids) Uncharacterized ORF;Protein of unknown function;expression downregulated in an ssr1 null mutant
1.16711				457960000	0.0540587	orf19.543	>orf19.543 FUM11 CGDID:CAL0000200 COORDS:Ca21chrR_C_albicans_SC5314:997835-999223W, translated using codon table 12 (462 amino acids) Uncharacterized ORF;Putative fumarate hydratase;transcriptionally regulated by iron;expression greater in high iron;ro
1.21661				181710000	0.0543111	orf19.4937	>orf19.4937 CHS3 CGDID:CAL0006283 COORDS:Ca21chr1_C_albicans_SC5314:2859992-2856351C, translated using codon table 12 (1213 amino acids) Verified ORF;Major chitin synthase of yeast-form and hyphal cells;synthesizes short-chitin fibrils;Chs4p-activated;
1.42977				27046000	0.0543361	orf19.6437	>orf19.6437 CDC23 CGDID:CAL0002194 COORDS:Ca21chrR_C_albicans_SC5314:1857783-1859531W, translated using codon table 12 (582 amino acids) Uncharacterized ORF;Similar to anaphase-promoting complex component;possibly transcriptionally regulated by Tac1p
1.21638				99131000	0.0545011	orf19.2175	>orf19.2175 orf19.2175 CGDID:CAL0005416 COORDS:Ca21chr2_C_albicans_SC5314:1642904-1644007W, translated using codon table 12 (367 amino acids) Uncharacterized ORF;Putative mitochondrial cell death effector;induced by nitric oxide
1.11453				1090000000	0.0553396	orf19.2884	>orf19.2884 CDC68 CGDID:CAL0005222 COORDS:Ca21chr4_C_albicans_SC5314:1444317-1447499W, translated using codon table 12 (1060 amino acids) Verified ORF;Functional homolog of S. cerevisiae Cdc68p, which is a transcription elongation factor;essential;possi
1.21459				174570000	0.0559789	orf19.2667	>orf19.2667 RPF1 CGDID:CAL0003496 COORDS:Ca21chr4_C_albicans_SC5314:680960-681850W, translated using codon table 12 (296 amino acids) Uncharacterized ORF;Putative nucleolar protein with a predicted role in the assembly and export of the large ribosomal su
1.41928				13487000	0.0589603	orf19.5377	>orf19.5377 HOS2 CGDID:CAL0004384 COORDS:Ca21chr3_C_albicans_SC5314:146266-147630W, translated using codon table 12 (454 amino acids) Verified ORF;Putative histone deacetylase;mutations affect filamentous growth;genetic evidence suggests that Set3p and
1.11186				1224200000	0.0595477	orf19.6230	>orf19.6230 orf19.6230 CGDID:CAL0000473 COORDS:Ca21chr1_C_albicans_SC5314:1450648-1451823W, translated using codon table 12 (391 amino acids) Uncharacterized ORF;Ortholog(s) have enzyme regulator activity, m7G(5)pppN diphosphatase activity
1.21041				125610000	0.0595594	orf19.3304	>orf19.3304 orf19.3304 CGDID:CAL0004045 COORDS:Ca21chr1_C_albicans_SC5314:235898-235086C, translated using codon table 12 (270 amino acids) Uncharacterized ORF;Ortholog(s) have RNA binding, manganese ion binding activity
1.16211				777060000	0.0598445	orf19.3417	>orf19.3417 ACF2 CGDID:CAL0004906 COORDS:Ca21chr6_C_albicans_SC5314:354214-356418W, translated using codon table 12 (734 amino acids) Uncharacterized ORF;Putative endo-1,3-beta-glucanase;fungal-specific (no human or murine homolog)
1.28503				32756000	0.0615382	orf19.1730	>orf19.1730 orf19.1730 CGDID:CAL0000827 COORDS:Ca21chr3_C_albicans_SC5314:258650-257641C, translated using codon table 12 (311 amino acids) Uncharacterized ORF;Ortholog(s) have DNA end binding, loop DNA binding activity, role in double-strand break repair
1.11007				1167900000	0.062521	orf19.7178	>orf19.7178 PRE5 CGDID:CAL0003090 COORDS:Ca21chr7_C_albicans_SC5314:875213-874362C, translated using codon table 12 (283 amino acids) Verified ORF;Alpha6 subunit of the 20S proteasome;regulated by Gcn4p;induced in response to amino acid starvation (3-am
1.10918				3216700000	0.0640306	orf19.7308	>orf19.7308 TUB1 CGDID:CAL0004511 COORDS:Ca21chrR_C_albicans_SC5314:1947002-1945442C, translated using codon table 12 (448 amino acids) Verified ORF;Alpha-tubulin;gene has intron;complements cold-sensitivity of S. cerevisiae tub1 mutant;C. albicans has
1.20487				112790000	0.0645817	orf19.6740	>orf19.6740 orf19.6740 CGDID:CAL0004852 COORDS:Ca21chr3_C_albicans_SC5314:1709405-1710745W, translated using codon table 12 (446 amino acids) Uncharacterized ORF;Ortholog(s) have ubiquitin-protein ligase activity and role in generation of catalytic splice
1.15816				287570000	0.0647357	orf19.2647	>orf19.2647 ZCF14 CGDID:CAL0003462 COORDS:Ca21chr5_C_albicans_SC5314:755770-754184C, translated using codon table 12 (528 amino acids) Verified ORF;Putative transcription factor with zinc cluster DNA-binding motif;caspofungin induced
1.20344				233560000	0.0659204	orf19.5182	>orf19.5182 POL3 CGDID:CAL0002693 COORDS:Ca21chr7_C_albicans_SC5314:601113-597997C, translated using codon table 12 (1038 amino acids) Verified ORF;Large subunit of DNA polymerase III;partially complements defects of an S. cerevisiae cdc2 mutant;differi
1.20307				196940000	0.066276	orf19.4788	>orf19.4788 ARG5,6 CGDID:CAL0004595 COORDS:Ca21chr1_C_albicans_SC5314:2043918-2041345C, translated using codon table 12 (857 amino acids) Verified ORF;Arginine biosynthetic enzyme activities;in S. cerevisiae, processed into distinct polypeptides with ace
1.20268				155480000	0.06665	orf19.6362	>orf19.6362 SPA2 CGDID:CAL0001359 COORDS:Ca21chr1_C_albicans_SC5314:2752581-2756981W, translated using codon table 12 (1466 amino acids) Verified ORF;Protein involved in cell polarity, Spitzenkorper formation;required for mouse virulence;localizes to hy
1.20153				109730000	0.0677562	orf19.4719	>orf19.4719 CWH41 CGDID:CAL0004381 COORDS:Ca21chr4_C_albicans_SC5314:1355471-1357963W, translated using codon table 12 (830 amino acids) Verified ORF;Processing alpha glucosidase I, involved in N-linked protein glycosylation and assembly of cell wall beta
1.15583				637600000	0.0677807	orf19.4441	>orf19.4441 orf19.4441 CGDID:CAL0001839 COORDS:Ca21chr1_C_albicans_SC5314:1557966-1556170C, translated using codon table 12 (598 amino acids) Uncharacterized ORF;Ortholog(s) have DNA replication origin binding, double-stranded DNA binding, single-stranded
1.10695				1130000000	0.0679541	orf19.7384	>orf19.7384 NOG1 CGDID:CAL0004804 COORDS:Ca21chr3_C_albicans_SC5314:1370294-1372216W, translated using codon table 12 (640 amino acids) Verified ORF;Putative GTPase;Hap43p-induced gene;mutation confers hypersensitivity to 5-fluorocytosine (5-FC), 5-fluo
1.39915				12622000	0.0686957	orf19.4475	>orf19.4475 KTR4 CGDID:CAL0001958 COORDS:Ca21chr1_C_albicans_SC5314:841877-840435C, translated using codon table 12 (480 amino acids) Verified ORF;Mannosyltransferase;induced during cell wall regeneration;fungal-specific (no human or murine homolog)
1.27361				67471000	0.0691712	orf19.252	>orf19.252 orf19.252 CGDID:CAL0004004 COORDS:Ca21chr3_C_albicans_SC5314:568049-567696C, translated using codon table 12 (117 amino acids) Uncharacterized ORF;Putative protein of unknown function;Hap43p-repressed gene;<I>S. cerevisiae</I> ortholog FMP37
1.27262				33073000	0.0698614	orf19.1040	>orf19.1040 MAD2 CGDID:CAL0001147 COORDS:Ca21chr1_C_albicans_SC5314:857326-857970W, translated using codon table 12 (214 amino acids) Verified ORF;Protein required for the spindle assembly checkpoint of the cell cycle;necessary for survival in host cell
1.10443				4421800000	0.0725907	orf19.4393	>orf19.4393 CIT1 CGDID:CAL0001178 COORDS:Ca21chrR_C_albicans_SC5314:777837-779333W, translated using codon table 12 (467 amino acids) Verified ORF;Citrate synthase;soluble in hyphae;expression greater in high iron;upregulated by phagocytosis, biofilm g
1.39165				7705100	0.0726274	orf19.757	>orf19.757 orf19.757 CGDID:CAL0001868 COORDS:Ca21chr1_C_albicans_SC5314:1009021-1011591W, translated using codon table 12 (856 amino acids) Uncharacterized ORF;Ortholog of <i>S. cerevisiae</i> : YPR089W, <i>C. glabrata CBS138</i> : CAGL0K08008g, <i>C. par
1.15164				362460000	0.0735002	orf19.5010	>orf19.5010 DIM1 CGDID:CAL0001590 COORDS:Ca21chr1_C_albicans_SC5314:3017083-3016103C, translated using codon table 12 (326 amino acids) Uncharacterized ORF;Putative 18S rRNA dimethylase with a predicted role in rRNA modification and processing;induced up
1.26678				44884000	0.0740679	orf19.1759	>orf19.1759 PHO23 CGDID:CAL0000874 COORDS:Ca21chr2_C_albicans_SC5314:2100586-2099138C, translated using codon table 12 (482 amino acids) Verified ORF;Ortholog(s) have methylated histone residue binding activity
1.26617				43268000	0.0745176	orf19.2697	>orf19.2697 orf19.2697 CGDID:CAL0003551 COORDS:Ca21chr4_C_albicans_SC5314:609473-615169W, translated using codon table 12 (1898 amino acids) Uncharacterized ORF;Ortholog(s) have role in protein monoubiquitination and cytoplasm localization
1.19444				130170000	0.074905	orf19.6435	>orf19.6435 orf19.6435 CGDID:CAL0002190 COORDS:Ca21chrR_C_albicans_SC5314:1856108-1856506W, translated using codon table 12 (132 amino acids) Verified ORF;Mitochondrial membrane protein;Hap43p-repressed gene
1.38737				29560000	0.0749428	orf19.1091	>orf19.1091 orf19.1091 CGDID:CAL0001277 COORDS:Ca21chr6_C_albicans_SC5314:955195-957267W, translated using codon table 12 (690 amino acids) Uncharacterized ORF;Ortholog(s) have role in ribosomal large subunit biogenesis and nucleolus localization
1.15052				692320000	0.0751	orf19.4725	>orf19.4725 SWI6 CGDID:CAL0004400 COORDS:Ca21chr1_C_albicans_SC5314:1893017-1895206W, translated using codon table 12 (729 amino acids) Verified ORF;Putative component of the MBF and SBF transcription complexes involved in G1/S cell-cycle progression;per
1.38606				2621800	0.0756641	orf19.5292	>orf19.5292 AXL2 CGDID:CAL0003673 COORDS:Ca21chr4_C_albicans_SC5314:893170-890369C, translated using codon table 12 (933 amino acids) Uncharacterized ORF;Protein not essential for viability;similar to S. cerevisiae Axl2p, which is a plasma membrane prote
1.26419				87617000	0.0759934	orf19.1902	>orf19.1902 NOC4 CGDID:CAL0002495 COORDS:Ca21chr2_C_albicans_SC5314:1498605-1500293W, translated using codon table 12 (562 amino acids) Verified ORF;Putative nucleolar protein;Hap43p-induced gene;mutation confers resistance to 5-fluorocytosine (5-FC), 5
1.19306				122030000	0.0763643	orf19.4639	>orf19.4639 orf19.4639 CGDID:CAL0003680 COORDS:Ca21chr4_C_albicans_SC5314:307948-307274C, translated using codon table 12 (224 amino acids) Uncharacterized ORF;Protein present in exponential and stationary growth phase yeast cultures
1.19306				139550000	0.0763643	orf19.829	>orf19.829 SCH9 CGDID:CAL0002687 COORDS:Ca21chr2_C_albicans_SC5314:827890-825527C, translated using codon table 12 (787 amino acids) Verified ORF;Protein kinase involved in growth control, normal cell size, resistance to rapamycin and cations, chlamydospo
1.14959				289890000	0.0764449	orf19.6891	>orf19.6891 RFC1 CGDID:CAL0005916 COORDS:Ca21chr2_C_albicans_SC5314:1185303-1182572C, translated using codon table 12 (888 amino acids) Uncharacterized ORF;Protein similar to S. cerevisiae Rfc1p, a subunit of DNA replication factor C;likely to be essenti
1.19284				212630000	0.076597	orf19.5487	>orf19.5487 CDC46 CGDID:CAL0005346 COORDS:Ca21chr2_C_albicans_SC5314:1274900-1272714C, translated using codon table 12 (728 amino acids) Uncharacterized ORF;Putative hexameric MCM complex subunit with a predicted role in control of cell division;periodic
1.26321				32794000	0.0767383	orf19.5825	>orf19.5825 NCB2 CGDID:CAL0002303 COORDS:Ca21chr2_C_albicans_SC5314:561278-560829C, translated using codon table 12 (149 amino acids) Verified ORF;Beta subunit of NC2, heterodimeric regulator of transcription;activates CDR1 transcription;possibly an ess
1.14859				494700000	0.0779001	orf19.7477	>orf19.7477 YRB1 CGDID:CAL0005670 COORDS:Ca21chrR_C_albicans_SC5314:136157-136795W, translated using codon table 12 (212 amino acids) Verified ORF;Functional homolog of S. cerevisiae Yrb1p, which regulates Gsp1p GTPase activity and thereby affects nucleoc
1.10162				2156500000	0.0780569	orf19.2929 orf19.3269	>orf19.2929 GSC1 CGDID:CAL0005999 COORDS:Ca21chr1_C_albicans_SC5314:511700-506007C, translated using codon table 12 (1897 amino acids) Verified ORF;Subunit of beta-1,3-glucan synthase;essential;gsc1 allele determines resistance/sensitivity to echinocand
1.148				278930000	0.0787822	orf19.730 orf19.729.1	>orf19.730 orf19.730 CGDID:CAF0007423 COORDS:Ca21chrR_C_albicans_SC5314:1566291-1568930W, translated using codon table 12 (879 amino acids) Uncharacterized ORF;Ortholog(s) have Rho GTPase activator activity, role in establishment or maintenance of actin c
1.19068				242520000	0.0789333	orf19.3340	>orf19.3340 SOD2 CGDID:CAL0004132 COORDS:Ca21chr1_C_albicans_SC5314:306028-305324C, translated using codon table 12 (234 amino acids) Verified ORF;Mitochondrial Mn-containing superoxide dismutase;protection against oxidative stress;homotetramer active;
1.19039				170310000	0.0792521	orf19.1089	>orf19.1089 PEX11 CGDID:CAL0001256 COORDS:Ca21chr6_C_albicans_SC5314:953697-954434W, translated using codon table 12 (245 amino acids) Uncharacterized ORF;Putative peroxisomal membrane protein involved in fatty acid oxidation;expression is Tac1p;Hms1p-d
1.37817				21977000	0.0801174	orf19.6778	>orf19.6778 orf19.6778 CGDID:CAL0004962 COORDS:Ca21chr3_C_albicans_SC5314:1655334-1659296W, translated using codon table 12 (1320 amino acids) Uncharacterized ORF;Ortholog(s) have phospholipid-translocating ATPase activity and role in endocytosis, intrace
1.25806				70696000	0.080709	orf19.5623	>orf19.5623 ARP4 CGDID:CAL0000584 COORDS:Ca21chr6_C_albicans_SC5314:704853-703444C, translated using codon table 12 (469 amino acids) Verified ORF;Subunit of the NuA4 histone acetyltransferase complex
1.10013				3798100000	0.0810841	orf19.4683	>orf19.4683 MLP1 CGDID:CAL0003820 COORDS:Ca21chr4_C_albicans_SC5314:209114-214612W, translated using codon table 12 (1832 amino acids) Uncharacterized ORF;Ortholog(s) have ribonucleoprotein complex binding activity
1.14645				682820000	0.0811056	orf19.2250	>orf19.2250 SPE3 CGDID:CAL0006284 COORDS:Ca21chr2_C_albicans_SC5314:1427916-1428809W, translated using codon table 12 (297 amino acids) Uncharacterized ORF;Ortholog(s) have spermidine synthase activity, role in pantothenate biosynthetic process, spermidin
1.37618				5017200	0.0812691	orf19.4998	>orf19.4998 ROB1 CGDID:CAL0000039 COORDS:Ca21chr1_C_albicans_SC5314:2993348-2996389W, translated using codon table 12 (991 amino acids) Verified ORF;Transcriptional regulator involved in control of biofilm formation;null mutant displays abnormal colony m
1.14591				334150000	0.0819374	orf19.3322	>orf19.3322 DUT1 CGDID:CAL0004091 COORDS:Ca21chr1_C_albicans_SC5314:261847-261368C, translated using codon table 12 (159 amino acids) Verified ORF;dUTP pyrophosphatase;cell-cycle regulated if expressed in S. cerevisiae;upstream MluI and SCB transcriptio
1.37325				12118000	0.0829907	orf19.729	>orf19.729 orf19.729 CGDID:CAL0001780 COORDS:Ca21chrR_C_albicans_SC5314:1642563-1643390W, translated using codon table 12 (275 amino acids) Verified ORF;Protein similar to S. cerevisiae She3p, an adaptor protein required for specific mRNA transport;trans
1.25419				78176000	0.0837955	orf19.250	>orf19.250 SLC1 CGDID:CAL0004001 COORDS:Ca21chr3_C_albicans_SC5314:564302-563421C, translated using codon table 12 (293 amino acids) Verified ORF;Putative fatty acyltransferase;protein repressed during the mating process
1.37149				8562000	0.0840376	orf19.3342	>orf19.3342 orf19.3342 CGDID:CAL0004136 COORDS:Ca21chr1_C_albicans_SC5314:309137-310987W, translated using codon table 12 (616 amino acids) Uncharacterized ORF;Ortholog(s) have role in protein deubiquitination and cytoplasm, nucleus localization
1.09865				870990000	0.0841739	orf19.1628	>orf19.1628 LAP41 CGDID:CAL0006379 COORDS:Ca21chr3_C_albicans_SC5314:472085-470532C, translated using codon table 12 (517 amino acids) Verified ORF;Putative aminopeptidase yscI precursor;not essential for viability;protein present in exponential and sta
1.09858				2021400000	0.0843305	orf19.5450	>orf19.5450 orf19.5450 CGDID:CAL0005272 COORDS:Ca21chr3_C_albicans_SC5314:26203-25109C, translated using codon table 12 (364 amino acids) Uncharacterized ORF;Putative 2-enoyl thioester reductase;protein present in exponential and stationary growth phase
1.18569				112770000	0.0845163	orf19.2782	>orf19.2782 orf19.2782 CGDID:CAL0004286 COORDS:Ca21chr1_C_albicans_SC5314:1649731-1650258W, translated using codon table 12 (175 amino acids) Uncharacterized ORF;Ortholog(s) have disulfide oxidoreductase activity, role in cellular response to oxidative st
1.25306				81607000	0.0847137	orf19.5871	>orf19.5871 SNF5 CGDID:CAL0002429 COORDS:Ca21chr3_C_albicans_SC5314:893060-890970C, translated using codon table 12 (696 amino acids) Verified ORF;SWI/SNF chromatin remodeling complex subunit involved in transcriptional regulation;mutants have defects in
1.1841				160550000	0.0863526	orf19.4787	>orf19.4787 orf19.4787 CGDID:CAL0004593 COORDS:Ca21chr1_C_albicans_SC5314:2038995-2041187W, translated using codon table 12 (730 amino acids) Uncharacterized ORF;Ortholog(s) have cytoplasm, nucleus localization
1.3665				9606400	0.0870609	orf19.1883	>orf19.1883 YCS4 CGDID:CAL0001793 COORDS:Ca21chr2_C_albicans_SC5314:1524754-1528272W, translated using codon table 12 (1172 amino acids) Uncharacterized ORF;Putative condensin complex subunit;cell-cycle regulated periodic mRNA expression
1.24967				53775000	0.0875103	orf19.5861	>orf19.5861 KRE9 CGDID:CAL0002403 COORDS:Ca21chr3_C_albicans_SC5314:870659-871474W, translated using codon table 12 (271 amino acids) Verified ORF;Protein of beta-1,6-glucan biosynthesis;required for serum-induced hyphal growth;required for efficient ut
1.09689				1162500000	0.0879564	orf19.512	>orf19.512 orf19.512 CGDID:CAL0000078 COORDS:Ca21chrR_C_albicans_SC5314:951493-948365C, translated using codon table 12 (1042 amino acids) Uncharacterized ORF;Predicted ORF in Assemblies 19, 20 and 21;essential;S. cerevisiae ortholog is essential
1.14179				314270000	0.0884303	orf19.5564	>orf19.5564 orf19.5564 CGDID:CAL0006207 COORDS:Ca21chr6_C_albicans_SC5314:596555-597253W, translated using codon table 12 (232 amino acids) Uncharacterized ORF;Ortholog(s) have nucleolus localization
1.3642				31597000	0.0884778	orf19.2114	>orf19.2114 orf19.2114 CGDID:CAL0005280 COORDS:Ca21chr2_C_albicans_SC5314:25825-24914C, translated using codon table 12 (303 amino acids) Uncharacterized ORF;Ortholog(s) have cytosol, nucleus localization
1.36278				26259000	0.0893635	orf19.6874	>orf19.6874 orf19.6874 CGDID:CAL0005869 COORDS:Ca21chr2_C_albicans_SC5314:1150098-1151921W, translated using codon table 12 (607 amino acids) Verified ORF;Putative helix-loop-helix (HLH) transcription factor with a role in filamentous growth
1.18093				112200000	0.0901095	orf19.96	>orf19.96 TOP1 CGDID:CAL0000708 COORDS:Ca21chr6_C_albicans_SC5314:188928-186586C, translated using codon table 12 (780 amino acids) Verified ORF;DNA topoisomerase I;required for wild-type growth and for wild-type mouse virulence;sensitive to camptotheci
1.0957				901240000	0.0905941	orf19.5085	>orf19.5085 orf19.5085 CGDID:CAL0001788 COORDS:Ca21chr1_C_albicans_SC5314:1769083-1772358W, translated using codon table 12 (1091 amino acids) Uncharacterized ORF;Ortholog(s) have nuclear localization sequence binding, protein transporter activity and rol
1.14028				524090000	0.0909058	orf19.4609 orf19.4612	>orf19.4609 orf19.4609 CGDID:CAL0003595 COORDS:Ca21chr4_C_albicans_SC5314:361972-361241C, translated using codon table 12 (243 amino acids) Uncharacterized ORF;Putative dienelactone hydrolase;protein abundance is affected by URA3 expression in the CAI-4
1.14022				566760000	0.0909938	orf19.3859	>orf19.3859 orf19.3859 CGDID:CAL0002094 COORDS:Ca21chrR_C_albicans_SC5314:1295933-1297159W, translated using codon table 12 (408 amino acids) Uncharacterized ORF;Putative microsomal beta-keto-reductase;transcription is upregulated in response to treatmen
1.36016				25982000	0.091016	orf19.2384	>orf19.2384 orf19.2384 CGDID:CAL0000811 COORDS:Ca21chrR_C_albicans_SC5314:750309-751415W, translated using codon table 12 (368 amino acids) Uncharacterized ORF;Ortholog(s) have role in mitochondrial translation and mitochondrial inner membrane localizatio
1.35924				19125000	0.091599	orf19.2331	>orf19.2331 ADA2 CGDID:CAL0000716 COORDS:Ca21chr1_C_albicans_SC5314:2405785-2404448C, translated using codon table 12 (445 amino acids) Verified ORF;Zinc finger transcriptional coactivator with a role in cell wall integrity and in sensitivity to caspofung
1.24441				81411000	0.0919937	orf19.1495	>orf19.1495 orf19.1495 CGDID:CAL0004780 COORDS:Ca21chr2_C_albicans_SC5314:343631-342834C, translated using codon table 12 (265 amino acids) Uncharacterized ORF;Ortholog(s) have role in L-methionine salvage from methylthioadenosine and cytosol, nucleus loc
1.09493				1354700000	0.0923267	orf19.1949	>orf19.1949 VPS1 CGDID:CAL0002589 COORDS:Ca21chr5_C_albicans_SC5314:270302-272383W, translated using codon table 12 (693 amino acids) Verified ORF;Dynamin-family GTPase-related protein;induced upon adherence to polystyrene;regulated by Gcn2p and Gcn4p
1.13776				766700000	0.0951347	orf19.2093	>orf19.2093 RFA1 CGDID:CAL0004564 COORDS:Ca21chr2_C_albicans_SC5314:55237-53363C, translated using codon table 12 (624 amino acids) Uncharacterized ORF;Putative DNA replication factor A;RNA abundance regulated by cell cycle, tyrosol and cell density
1.09329				5682500000	0.0961109	orf19.7382	>orf19.7382 CAM1 CGDID:CAL0004797 COORDS:Ca21chr3_C_albicans_SC5314:1366732-1368199W, translated using codon table 12 (412 amino acids) Uncharacterized ORF;Putative translation elongation factor eEF1 gamma;protein level decreased in stationary phase cult
1.35085				16822000	0.097064	orf19.3314	>orf19.3314 orf19.3314 CGDID:CAL0004070 COORDS:Ca21chr1_C_albicans_SC5314:252497-252045C, translated using codon table 12 (150 amino acids) Uncharacterized ORF;Ortholog(s) have role in ER to Golgi vesicle-mediated transport and TRAPP complex, cytosol, nuc
1.23667				40172000	0.098887	orf19.6326	>orf19.6326 orf19.6326 CGDID:CAL0001290 COORDS:Ca21chr6_C_albicans_SC5314:13439-12654C, translated using codon table 12 (261 amino acids) Uncharacterized ORF;Ortholog of <i>C. parapsilosis CDC317</i> : CPAR2_603380, <i>Candida tenuis NRRL Y-1498</i> : CAN
1.23645				72862000	0.099087	orf19.4755	>orf19.4755 KEX2 CGDID:CAL0004481 COORDS:Ca21chr1_C_albicans_SC5314:1959364-1956554C, translated using codon table 12 (936 amino acids) Verified ORF;Subtilisin-like protease (proprotein convertase), processes aspartyl proteinase Sap2p;required for hyphal
1.23452				83420000	0.100861	orf19.7108	>orf19.7108 orf19.7108 CGDID:CAL0002810 COORDS:Ca21chr7_C_albicans_SC5314:19179-19871W, translated using codon table 12 (230 amino acids) Uncharacterized ORF;D-ribulose-5-phosphate 3-epimerase;stationary phase enriched protein
1.17227				186720000	0.100998	orf19.558	>orf19.558 GUT1 CGDID:CAL0000250 COORDS:Ca21chrR_C_albicans_SC5314:1128907-1127012C, translated using codon table 12 (631 amino acids) Uncharacterized ORF;Putative glycerol kinase;downregulated upon adherence to polystyrene;greater mRNA abundance observ
1.23415				73754000	0.101205	orf19.3482	>orf19.3482 orf19.3482 CGDID:CAL0005086 COORDS:Ca21chr6_C_albicans_SC5314:499269-500660W, translated using codon table 12 (463 amino acids) Uncharacterized ORF;Ortholog(s) have NAD+ diphosphatase activity, role in NADH metabolic process and cytosol, nucle
1.23372				64751000	0.101613	orf19.481	>orf19.481 GCD1 CGDID:CAL0005825 COORDS:Ca21chrR_C_albicans_SC5314:902746-901304C, translated using codon table 12 (480 amino acids) Uncharacterized ORF;Putative translation initiation factor;transcription is regulated by Mig1p;genes encoding ribosomal
1.13383				313610000	0.102046	orf19.3767	>orf19.3767 orf19.3767 CGDID:CAL0001246 COORDS:Ca21chr1_C_albicans_SC5314:2723345-2727364W, translated using codon table 12 (1339 amino acids) Uncharacterized ORF;Ortholog(s) have signal sequence binding activity, role in protein targeting to vacuole and
1.0905				1140100000	0.102779	orf19.6285	>orf19.6285 GLC7 CGDID:CAL0000595 COORDS:Ca21chrR_C_albicans_SC5314:1660910-1661902W, translated using codon table 12 (330 amino acids) Verified ORF;Putative catalytic subunit of type 1 serine/threonine protein phosphatase;regulated by Shp1p;transcripti
1.23208				61694000	0.10315	orf19.2365	>orf19.2365 POL2 CGDID:CAL0000768 COORDS:Ca21chrR_C_albicans_SC5314:1506184-1499549C, translated using codon table 12 (2211 amino acids) Uncharacterized ORF;DNA polymerase epsilon;transcriptionally induced by interaction with macrophage;transcription is
1.13301				426540000	0.103531	orf19.1193	>orf19.1193 GNP1 CGDID:CAL0002160 COORDS:Ca21chr6_C_albicans_SC5314:56126-54387C, translated using codon table 12 (579 amino acids) Uncharacterized ORF;Protein similar to asparagine and glutamine permease;fluconazole or caspofungin induced;transcription
1.17021				126850000	0.103724	orf19.1298	>orf19.1298 NUP84 CGDID:CAL0003108 COORDS:Ca21chr4_C_albicans_SC5314:806316-803782C, translated using codon table 12 (844 amino acids) Uncharacterized ORF;Ortholog(s) have structural constituent of nuclear pore activity
1.09009				1047500000	0.103778	orf19.5369	>orf19.5369 orf19.5369 CGDID:CAL0004363 COORDS:Ca21chr2_C_albicans_SC5314:2227017-2225932C, translated using codon table 12 (361 amino acids) Uncharacterized ORF;Ortholog(s) have uroporphyrinogen decarboxylase activity, role in heme biosynthetic process a
1.341				18345000	0.103781	orf19.5528	>orf19.5528 MOB1 CGDID:CAL0006122 COORDS:Ca21chr6_C_albicans_SC5314:529251-528430C, translated using codon table 12 (273 amino acids) Uncharacterized ORF;Putative mitotic exit network component;periodic mRNA expression, peak at cell-cycle G2/M phase
1.13274				249050000	0.104024	orf19.780	>orf19.780 DUR1,2 CGDID:CAL0001974 COORDS:Ca21chr1_C_albicans_SC5314:965238-970679W, translated using codon table 12 (1813 amino acids) Verified ORF;Urea amidolyase;urea carboxylase and allophanate hydrolase activities;hydrolyzes urea to CO2;needed for
1.13234				653610000	0.104757	orf19.5530	>orf19.5530 NAB3 CGDID:CAL0006136 COORDS:Ca21chr6_C_albicans_SC5314:529703-532213W, translated using codon table 12 (836 amino acids) Uncharacterized ORF;Putative nuclear polyadenylated RNA-binding protein;flucytosine repressed
1.13214				673120000	0.105132	orf19.7654	>orf19.7654 CPR6 CGDID:CAL0000916 COORDS:Ca21chrR_C_albicans_SC5314:2258818-2259927W, translated using codon table 12 (369 amino acids) Uncharacterized ORF;Putative peptidyl-prolyl cis-trans isomerase;macrophage/pseudohyphal-repressed;heavy metal (cadmi
1.13208				437410000	0.105233	orf19.7081	>orf19.7081 SPL1 CGDID:CAL0002170 COORDS:Ca21chr7_C_albicans_SC5314:62478-63944W, translated using codon table 12 (488 amino acids) Uncharacterized ORF;Protein similar to S. cerevisiae Spl1p, which is involved in tRNA splicing;member of pyridoxal-phospha
1.13202				262390000	0.105354	orf19.2070	>orf19.2070 orf19.2070 CGDID:CAL0004485 COORDS:Ca21chr2_C_albicans_SC5314:90652-92431W, translated using codon table 12 (568 amino acids) Uncharacterized ORF;Ortholog(s) have role in G1/S transition of mitotic cell cycle, chromatin remodeling, nucleosome
1.16869				123230000	0.105761	orf19.4107	>orf19.4107 orf19.4107 CGDID:CAL0005559 COORDS:Ca21chr2_C_albicans_SC5314:1248733-1249938W, translated using codon table 12 (401 amino acids) Uncharacterized ORF;Ortholog(s) have exopolyphosphatase activity, role in polyphosphate catabolic process and cyt
1.08927				23800000000	0.105826	orf19.5383	>orf19.5383 PMA1 CGDID:CAL0004402 COORDS:Ca21chr3_C_albicans_SC5314:133120-135807W, translated using codon table 12 (895 amino acids) Verified ORF;Plasma membrane H(+)-ATPase;highly expressed, comprising 20-40% of total plasma membrane protein;abundance
1.16858				123310000	0.105909	orf19.3752	>orf19.3752 RAD51 CGDID:CAL0001214 COORDS:Ca21chrR_C_albicans_SC5314:485125-484040C, translated using codon table 12 (361 amino acids) Verified ORF;Protein involved in homologous recombination and DNA repair;flucytosine induced;slow growth and increased
1.33788				8606400	0.105974	orf19.3415	>orf19.3415 PTK2 CGDID:CAL0004902 COORDS:Ca21chr6_C_albicans_SC5314:360612-358174C, translated using codon table 12 (812 amino acids) Verified ORF;Putative protein kinase of polyamine import;mutation confers hypersensitivity to high concentrations of tun
1.16794				139900000	0.106781	orf19.1609	>orf19.1609 orf19.1609 CGDID:CAL0006321 COORDS:Ca21chr3_C_albicans_SC5314:512847-514847W, translated using codon table 12 (666 amino acids) Uncharacterized ORF;Ortholog(s) have role in endonucleolytic cleavage in ITS1 to separate SSU-rRNA from 5.8S rRNA a
1.1311				268950000	0.107057	orf19.4809	>orf19.4809 ERG12 CGDID:CAL0005299 COORDS:Ca21chr1_C_albicans_SC5314:2087469-2088764W, translated using codon table 12 (431 amino acids) Uncharacterized ORF;Ortholog(s) have mevalonate kinase activity and role in ergosterol biosynthetic process, farnesyl
1.13105				536520000	0.107139	orf19.4616	>orf19.4616 POL30 CGDID:CAL0003616 COORDS:Ca21chr4_C_albicans_SC5314:349157-349936W, translated using codon table 12 (259 amino acids) Uncharacterized ORF;Similar to proliferating cell nuclear antigen (PCNA);RNA abundance regulated by tyrosol and cell de
1.22732				53494000	0.107705	orf19.6843	>orf19.6843 orf19.6843 CGDID:CAL0005761 COORDS:Ca21chr1_C_albicans_SC5314:926944-928065W, translated using codon table 12 (373 amino acids) Uncharacterized ORF;Ortholog(s) have role in CenH3-containing nucleosome assembly at centromere, chromatin silencin
1.1307				312820000	0.107803	orf19.4593	>orf19.4593 RGA2 CGDID:CAL0002942 COORDS:Ca21chr4_C_albicans_SC5314:391839-388309C, translated using codon table 12 (1176 amino acids) Verified ORF;Putative GTPase-activating protein (GAP) for Rho-type GTPase Cdc42p;involved in cell signaling pathways co
1.16628				113030000	0.109059	orf19.1033	>orf19.1033 STR2 CGDID:CAL0001118 COORDS:Ca21chr1_C_albicans_SC5314:786942-785155C, translated using codon table 12 (595 amino acids) Uncharacterized ORF;Ortholog(s) have cystathionine gamma-synthase activity, role in transsulfuration and cytosol, nucleus
1.08785				1009900000	0.109434	orf19.3462	>orf19.3462 SAR1 CGDID:CAL0005033 COORDS:Ca21chr6_C_albicans_SC5314:461502-462232W, translated using codon table 12 (190 amino acids) Verified ORF;Functional homolog of S. cerevisiae Sar1p, which is required for ER-to-Golgi protein transport;binds GTP;s
1.16592				182940000	0.109563	orf19.7546	>orf19.7546 orf19.7546 CGDID:CAL0000056 COORDS:Ca21chrR_C_albicans_SC5314:2070097-2071701W, translated using codon table 12 (534 amino acids) Uncharacterized ORF;Ortholog(s) have RNA-dependent ATPase activity, role in maturation of SSU-rRNA from tricistro
1.08746				1807600000	0.110433	orf19.953.1	>orf19.953.1 COF1 CGDID:CAF0006915 COORDS:Ca21chr5_C_albicans_SC5314:67605-68261W, translated using codon table 12 (141 amino acids) Uncharacterized ORF;Putative cofilin;macrophage-induced protein;protein present in exponential and stationary-phase yeas
1.08663				1862300000	0.112594	orf19.6197	>orf19.6197 DHH1 CGDID:CAL0006152 COORDS:Ca21chr1_C_albicans_SC5314:1511622-1509973C, translated using codon table 12 (549 amino acids) Verified ORF;Putative RNA helicase
1.22235				40753000	0.112622	orf19.6822	>orf19.6822 orf19.6822 CGDID:CAL0005691 COORDS:Ca21chr3_C_albicans_SC5314:1551881-1550805C, translated using codon table 12 (296 amino acids) Uncharacterized ORF;Ortholog(s) have NEDD8 ligase activity, ubiquitin binding activity and role in positive regul
1.12798				695310000	0.112992	orf19.597	>orf19.597 orf19.597 CGDID:CAL0000376 COORDS:Ca21chrR_C_albicans_SC5314:1751403-1749721C, translated using codon table 12 (560 amino acids) Uncharacterized ORF;Predicted ORF in Assemblies 19, 20 and 21;Gcn4p-regulated
1.08645				4570000000	0.113074	orf19.1389	>orf19.1389 orf19.1389 CGDID:CAL0003946 COORDS:Ca21chr2_C_albicans_SC5314:1974713-1975204W, translated using codon table 12 (163 amino acids) Uncharacterized ORF;Ortholog(s) have poly(A) RNA binding activity, role in mRNA metabolic process and cytoplasm l
1.32705				25262000	0.11386	orf19.5619	>orf19.5619 orf19.5619 CGDID:CAL0000570 COORDS:Ca21chr6_C_albicans_SC5314:693815-695932W, translated using codon table 12 (705 amino acids) Uncharacterized ORF;Predicted ORF in Assemblies 19, 20 and 21;transcription is induced in response to alpha pherom
1.12711				696090000	0.114687	orf19.6063	>orf19.6063 UBP6 CGDID:CAL0005163 COORDS:Ca21chr1_C_albicans_SC5314:71069-72582W, translated using codon table 12 (478 amino acids) Uncharacterized ORF;Putative ubiquitin-specific protease of the 26S proteasome;oxidative stress-induced via Cap1p
1.21968				84428000	0.115324	orf19.6044	>orf19.6044 MOB2 CGDID:CAL0005128 COORDS:Ca21chr1_C_albicans_SC5314:103869-104810W, translated using codon table 12 (313 amino acids) Verified ORF;Mob1/phocein domain protein of RAM signaling network of cell wall integrity;role in cell separation, cortic
1.1616				190700000	0.115689	orf19.7086	>orf19.7086 orf19.7086 CGDID:CAL0002176 COORDS:Ca21chr7_C_albicans_SC5314:55866-52951C, translated using codon table 12 (971 amino acids) Uncharacterized ORF;Ortholog(s) have protein transporter activity, role in transcription factor import into nucleus a
1.16134				144420000	0.116066	orf19.6477	>orf19.6477 orf19.6477 CGDID:CAL0002289 COORDS:Ca21chr7_C_albicans_SC5314:511622-510342C, translated using codon table 12 (426 amino acids) Uncharacterized ORF;Ortholog(s) have tRNA (guanine-N7-)-methyltransferase activity, role in tRNA methylation and cy
1.16059				226280000	0.117143	orf19.5006.1	>orf19.5006.1 orf19.5006.1 CGDID:CAF0007029 COORDS:Ca21chr1_C_albicans_SC5314:3010010-3009603C, translated using codon table 12 (111 amino acids) Uncharacterized ORF;Ortholog(s) have SNAP receptor activity and role in Golgi to plasma membrane transport, c
1.12544				451800000	0.117999	orf19.1560	>orf19.1560 POB3 CGDID:CAL0005561 COORDS:Ca21chr2_C_albicans_SC5314:471244-472860W, translated using codon table 12 (538 amino acids) Verified ORF;Protein similar to S. cerevisiae Pob3p, which is involved in chromatin assembly and disassembly;transposon
1.12486				373840000	0.119148	orf19.5118	>orf19.5118 SDS24 CGDID:CAL0002512 COORDS:Ca21chr1_C_albicans_SC5314:1839339-1841225W, translated using codon table 12 (628 amino acids) Uncharacterized ORF;Protein similar to S. cerevisiae Sds24p;transcription regulated by Mig1p and Tup1p;fluconazole-i
1.21595				85179000	0.119185	orf19.3583	>orf19.3583 orf19.3583 CGDID:CAL0005996 COORDS:Ca21chr2_C_albicans_SC5314:1127371-1126214C, translated using codon table 12 (385 amino acids) Uncharacterized ORF;Ortholog(s) have role in protein export from nucleus, regulation of chromatin silencing at te
1.12389				515710000	0.12113	orf19.2518	>orf19.2518 orf19.2518 CGDID:CAL0002396 COORDS:Ca21chrR_C_albicans_SC5314:325382-324501C, translated using codon table 12 (293 amino acids) Uncharacterized ORF;Ortholog(s) have ATPase activator activity, soluble NSF attachment protein activity
1.08294				961780000	0.12257	orf19.4093	>orf19.4093 PES1 CGDID:CAL0004971 COORDS:Ca21chr2_C_albicans_SC5314:1902937-1901174C, translated using codon table 12 (587 amino acids) Verified ORF;Pescadillo homolog required for filament-to-yeast switching;mutation confers hypersensitivity to 5-fluoro
1.31562				25151000	0.122619	orf19.2948	>orf19.2948 SNO1 CGDID:CAL0006041 COORDS:Ca21chr1_C_albicans_SC5314:544113-544862W, translated using codon table 12 (249 amino acids) Verified ORF;Protein with a predicted role in pyridoxine metabolism;expressed during stationary phase;transcription is
1.0825				3981700000	0.12379	orf19.4223	>orf19.4223 GCD11 CGDID:CAL0000138 COORDS:Ca21chr5_C_albicans_SC5314:483987-482383C, translated using codon table 12 (534 amino acids) Uncharacterized ORF;Protein similar to S. cerevisiae Gcd11p, which is a subunit of translation initiation factor eIF2;l
1.12246				460820000	0.124049	orf19.7424 orf19.7397.1 orf19.7398	>orf19.7424 NSA2 CGDID:CAL0005489 COORDS:Ca21chr3_C_albicans_SC5314:1457022-1457807W, translated using codon table 12 (261 amino acids) Uncharacterized ORF;Putative protein constituent of 66S pre-ribosomal particles;Hap43p-induced gene;decreased express
1.31313				13654000	0.124585	orf19.2047	>orf19.2047 orf19.2047 CGDID:CAL0004417 COORDS:Ca21chr2_C_albicans_SC5314:132181-132807W, translated using codon table 12 (208 amino acids) Verified ORF;Putative protein of unknown function;Hap43p-repressed gene;mutation confers hypersensitivity to toxi
1.08189				2652600000	0.125514	orf19.506	>orf19.506 YDJ1 CGDID:CAL0000049 COORDS:Ca21chrR_C_albicans_SC5314:939273-940454W, translated using codon table 12 (393 amino acids) Uncharacterized ORF;Putative type I HSP40 co-chaperone;heavy metal (cadmium) stress-induced
1.08183				1599200000	0.125669	orf19.1153	>orf19.1153 GAD1 CGDID:CAL0002044 COORDS:Ca21chr1_C_albicans_SC5314:2555881-2557587W, translated using codon table 12 (568 amino acids) Uncharacterized ORF;Putative glutamate decarboxylase;alkaline, macrophage-downregulated gene;amphotericin B induced;
1.15459				156050000	0.126117	orf19.4268	>orf19.4268 UTP13 CGDID:CAL0000293 COORDS:Ca21chr5_C_albicans_SC5314:570509-568110C, translated using codon table 12 (799 amino acids) Verified ORF;Putative U3 snoRNA-associated protein;Hap43p-induced gene;downregulated in core stress response;physical
1.08062				1330900000	0.129144	orf19.4317	>orf19.4317 GRE3 CGDID:CAL0000925 COORDS:Ca21chr5_C_albicans_SC5314:650942-649827C, translated using codon table 12 (371 amino acids) Verified ORF;Putative D-xylose reductase;antigenic in murine systemic infection;soluble protein in hyphae;transcriptio
1.20618				78565000	0.129718	orf19.3965	>orf19.3965 orf19.3965 CGDID:CAL0003053 COORDS:Ca21chr5_C_albicans_SC5314:1038734-1038084C, translated using codon table 12 (216 amino acids) Uncharacterized ORF;Ortholog(s) have role in double-strand break repair via homologous recombination, meiotic gen
1.3055				20857000	0.130761	orf19.5181	>orf19.5181 NIK1 CGDID:CAL0002691 COORDS:Ca21chr7_C_albicans_SC5314:601548-604793W, translated using codon table 12 (1081 amino acids) Verified ORF;Histidine kinase involved in a two-component signaling pathway that regulates cell wall biosynthesis;requi
1.11915				770500000	0.131052	orf19.7136	>orf19.7136 SPT6 CGDID:CAL0002923 COORDS:Ca21chr7_C_albicans_SC5314:934914-939119W, translated using codon table 12 (1401 amino acids) Verified ORF;Protein similar to S. cerevisiae Spt6p transcription elongation factor;transposon mutation affects filamen
1.07964				3548500000	0.131978	orf19.6034	>orf19.6034 TUB2 CGDID:CAL0005101 COORDS:Ca21chr1_C_albicans_SC5314:125597-123869C, translated using codon table 12 (449 amino acids) Verified ORF;Beta-tubulin;functional homolog of ScTub2p;overproduction causes S. cerevisiae inviability;has two intron
1.15083				109110000	0.131987	orf19.1509	>orf19.1509 ROD1 CGDID:CAL0005393 COORDS:Ca21chr2_C_albicans_SC5314:372659-369888C, translated using codon table 12 (923 amino acids) Uncharacterized ORF;Protein not essential for viability;similar to S. cerevisiae Rod1p, which is a membrane protein with
1.20282				43688000	0.133485	orf19.820	>orf19.820 SDS22 CGDID:CAL0002677 COORDS:Ca21chr2_C_albicans_SC5314:840282-839158C, translated using codon table 12 (374 amino acids) Uncharacterized ORF;Putative protein serine-threonine phosphatase;macrophage/pseudohyphal-repressed
1.14973				133280000	0.133735	orf19.5379	>orf19.5379 ERG4 CGDID:CAL0004388 COORDS:Ca21chr3_C_albicans_SC5314:143572-144981W, translated using codon table 12 (469 amino acids) Uncharacterized ORF;Protein similar to sterol C-24 reductase;shows Mob2p-dependent hyphal regulation;fluconazole-induce
1.30124				15681000	0.134297	orf19.587	>orf19.587 orf19.587 CGDID:CAL0000345 COORDS:Ca21chr5_C_albicans_SC5314:196724-197917W, translated using codon table 12 (397 amino acids) Uncharacterized ORF;Ortholog(s) have transcription export complex localization
1.14935				180090000	0.134347	orf19.7531	>orf19.7531 orf19.7531 CGDID:CAL0000023 COORDS:Ca21chrR_C_albicans_SC5314:25163-24474C, translated using codon table 12 (229 amino acids) Uncharacterized ORF;Putative protein of unknown function;stationary phase enriched protein;transcription is induced
1.30067				11445000	0.134779	orf19.2711.1	>orf19.2711.1 MED20 CGDID:CAF0006963 COORDS:Ca21chr4_C_albicans_SC5314:592276-591485C, translated using codon table 12 (237 amino acids) Verified ORF;Subunit of the RNA polymerase II mediator complex;involved in control of filamentous growth and biofilm
1.20126				67434000	0.135256	orf19.3093	>orf19.3093 MSH2 CGDID:CAL0001526 COORDS:Ca21chr4_C_albicans_SC5314:1578386-1575765C, translated using codon table 12 (873 amino acids) Uncharacterized ORF;Putative DNA mismatch repair factor;transcription is regulated by Nrg1p;flucytosine repressed;RN
1.07835				809760000	0.135808	orf19.1233	>orf19.1233 ADE4 CGDID:CAL0002876 COORDS:Ca21chr1_C_albicans_SC5314:1678759-1677134C, translated using codon table 12 (541 amino acids) Uncharacterized ORF;Putative phosphoribosylpyrophosphate amidotransferase;flucytosine induced
1.29887				7308000	0.136295	orf19.6893	>orf19.6893 orf19.6893 CGDID:CAL0005917 COORDS:Ca21chr2_C_albicans_SC5314:1187214-1185853C, translated using codon table 12 (453 amino acids) Uncharacterized ORF;Ortholog(s) have role in ER to Golgi vesicle-mediated transport
1.07803				3103900000	0.136742	orf19.6749	>orf19.6749 KRS1 CGDID:CAL0004871 COORDS:Ca21chr3_C_albicans_SC5314:1699059-1697275C, translated using codon table 12 (594 amino acids) Uncharacterized ORF;Putative tRNA-Lys synthetase;genes encoding ribosomal subunits, translation factors, tRNA syntheta
1.14711				179690000	0.137972	orf19.4479	>orf19.4479 orf19.4479 CGDID:CAL0001965 COORDS:Ca21chr1_C_albicans_SC5314:851044-848882C, translated using codon table 12 (720 amino acids) Uncharacterized ORF;Putative U3-containing 90S preribosome subunit;Hap43p-induced gene;downregulated during core
1.29652				9416800	0.138296	orf19.5751	>orf19.5751 ORM1 CGDID:CAL0001465 COORDS:Ca21chr6_C_albicans_SC5314:814324-813518C, translated using codon table 12 (268 amino acids) Verified ORF;Putative endoplasmic reticulum membrane protein;Hap43p-repressed gene;mutation confers hypersensitivity to
1.1964				40451000	0.140889	orf19.1805	>orf19.1805 PEX14 CGDID:CAL0001580 COORDS:Ca21chrR_C_albicans_SC5314:1066201-1067559W, translated using codon table 12 (452 amino acids) Uncharacterized ORF;Ortholog(s) have protein binding, bridging activity, role in protein import into peroxisome matrix
1.29236				10796000	0.14188	orf19.7210	>orf19.7210 orf19.7210 CGDID:CAL0003765 COORDS:Ca21chr1_C_albicans_SC5314:3090053-3091060W, translated using codon table 12 (335 amino acids) Uncharacterized ORF;Ortholog(s) have cytosol, nucleus localization
1.19529				68021000	0.142194	orf19.1078	>orf19.1078 HBR2 CGDID:CAL0001229 COORDS:Ca21chr6_C_albicans_SC5314:932489-931212C, translated using codon table 12 (425 amino acids) Uncharacterized ORF;Putative alanine glyoxylate aminotransferase;regulated by Gcn4p and hemoglobin;stationary phase enr
1.07617				4856200000	0.142411	orf19.6402	>orf19.6402 CYS3 CGDID:CAL0002103 COORDS:Ca21chrR_C_albicans_SC5314:1805750-1806949W, translated using codon table 12 (399 amino acids) Uncharacterized ORF;Cystathionine gamma-lyase;upregulated by alkaline, biofilm, amphotericin B, heavy metal (cadmium)
1.19507				34546000	0.142456	orf19.4807	>orf19.4807 orf19.4807 CGDID:CAL0005294 COORDS:Ca21chr1_C_albicans_SC5314:2080938-2081912W, translated using codon table 12 (324 amino acids) Uncharacterized ORF;Ortholog(s) have inorganic diphosphatase activity, role in aerobic respiration and mitochondr
1.29163				11277000	0.14252	orf19.2655	>orf19.2655 BUB3 CGDID:CAL0003474 COORDS:Ca21chr5_C_albicans_SC5314:731837-732958W, translated using codon table 12 (373 amino acids) Uncharacterized ORF;Protein similar to S. cerevisiae Bub3p, a kinetochore checkpoint component;induced under hydroxyurea
1.11394				248420000	0.142594	orf19.5995	>orf19.5995 MCA1 CGDID:CAL0003470 COORDS:Ca21chr3_C_albicans_SC5314:1128917-1127571C, translated using codon table 12 (448 amino acids) Verified ORF;Putative cysteine protease with similarity to S. cerevisiae Mca1p;has a role in apoptotic cell death upon
1.11371				434510000	0.143129	orf19.1891	>orf19.1891 APR1 CGDID:CAL0001825 COORDS:Ca21chr2_C_albicans_SC5314:1513476-1512217C, translated using codon table 12 (419 amino acids) Verified ORF;Vacuolar aspartic proteinase;mRNA abundance equivalent in yeast-form and mycelial cells but is elevated a
1.29043				23548000	0.143568	orf19.7489	>orf19.7489 orf19.7489 CGDID:CAL0005717 COORDS:Ca21chrR_C_albicans_SC5314:112632-108226C, translated using codon table 12 (1468 amino acids) Uncharacterized ORF;Ortholog(s) have Rho GTPase activator activity
1.19227				34462000	0.145786	orf19.1813	>orf19.1813 FLC2 CGDID:CAL0001600 COORDS:Ca21chrR_C_albicans_SC5314:1547993-1550428W, translated using codon table 12 (811 amino acids) Uncharacterized ORF;Protein involved in heme uptake;putative FAD transporter, similar to S. cerevisiae Flc2p
1.07507				1114200000	0.145843	orf19.3034	>orf19.3034 RLI1 CGDID:CAL0001388 COORDS:Ca21chr1_C_albicans_SC5314:699468-697600C, translated using codon table 12 (622 amino acids) Uncharacterized ORF;Member of RNase L inhibitor (RLI) subfamily of ABC family;predicted not to be a transporter;regulat
1.11211				255610000	0.146818	orf19.5694	>orf19.5694 orf19.5694 CGDID:CAL0000748 COORDS:Ca21chr5_C_albicans_SC5314:6532-7230W, translated using codon table 12 (232 amino acids) Uncharacterized ORF;Predicted ORF from Assembly 19;removed from Assembly 20;restored based on transcription data
1.07467				2880000000	0.147083	orf19.6387	>orf19.6387 HSP104 CGDID:CAL0001410 COORDS:Ca21chrR_C_albicans_SC5314:1791743-1789044C, translated using codon table 12 (899 amino acids) Verified ORF;Heat-shock protein;functional homolog of S. cerevisiae Hsp104p;chaperone and prion propagation activit
1.07462				1799100000	0.147253	orf19.4870	>orf19.4870 DBP3 CGDID:CAL0005460 COORDS:Ca21chr1_C_albicans_SC5314:2197121-2198815W, translated using codon table 12 (564 amino acids) Uncharacterized ORF;Putative ATP-dependent DEAD-box RNA helicase;Hap43p-induced gene;decreased expression in response
1.28601				19451000	0.147483	orf19.6247	>orf19.6247 orf19.6247 CGDID:CAL0000499 COORDS:Ca21chr1_C_albicans_SC5314:1418596-1421211W, translated using codon table 12 (871 amino acids) Uncharacterized ORF;Ortholog(s) have chromatin binding activity
1.19044				88184000	0.148005	orf19.967	>orf19.967 orf19.967 CGDID:CAL0003747 COORDS:Ca21chr5_C_albicans_SC5314:47366-46404C, translated using codon table 12 (320 amino acids) Uncharacterized ORF;Ortholog(s) have endodeoxyribonuclease activity, exodeoxyribonuclease activity, ribonuclease activi
1.18989				55016000	0.148666	orf19.2075	>orf19.2075 DFG5 CGDID:CAL0004498 COORDS:Ca21chr2_C_albicans_SC5314:82837-84192W, translated using codon table 12 (451 amino acids) Verified ORF;N-linked mannoprotein of cell wall and membrane;possible signal transducer;role in hyphal growth and HWP1 in
1.18973				44833000	0.148869	orf19.2480.1	>orf19.2480.1 AUT7 CGDID:CAF0006954 COORDS:Ca21chr1_C_albicans_SC5314:1191631-1192122W, translated using codon table 12 (135 amino acids) Uncharacterized ORF;Putative autophagosome protein;macrophage/pseudohyphal-repressed;alternatively spliced intron i
1.13966				100880000	0.150506	orf19.1533	>orf19.1533 orf19.1533 CGDID:CAL0005469 COORDS:Ca21chr2_C_albicans_SC5314:425071-426447W, translated using codon table 12 (458 amino acids) Uncharacterized ORF;Hap43p-induced gene;<I>S. cerevisiae</I> ortholog YKL077W localizes to fungal-type vacuole
1.13951				139050000	0.150755	orf19.7538	>orf19.7538 orf19.7538 CGDID:CAL0000026 COORDS:Ca21chrR_C_albicans_SC5314:16827-14971C, translated using codon table 12 (618 amino acids) Uncharacterized ORF;Ortholog(s) have ATP-dependent DNA helicase activity, role in DNA replication, mitochondrial geno
1.28218				4186000	0.150925	orf19.5131	>orf19.5131 orf19.5131 CGDID:CAL0002548 COORDS:Ca21chr7_C_albicans_SC5314:703314-705476W, translated using codon table 12 (720 amino acids) Uncharacterized ORF;Hap43p-repressed gene
1.07325				939620000	0.15161	orf19.5627	>orf19.5627 orf19.5627 CGDID:CAL0000592 COORDS:Ca21chr6_C_albicans_SC5314:712332-713438W, translated using codon table 12 (368 amino acids) Uncharacterized ORF;Hap43p-induced gene
1.27999				25094000	0.152923	orf19.5003	>orf19.5003 orf19.5003 CGDID:CAL0001567 COORDS:Ca21chr1_C_albicans_SC5314:3003092-3001746C, translated using codon table 12 (448 amino acids) Uncharacterized ORF;Ortholog(s) have GTPase regulator activity and cytoplasm, nuclear envelope localization
1.07282				3751400000	0.152999	orf19.6373	>orf19.6373 DCP2 CGDID:CAL0001378 COORDS:Ca21chrR_C_albicans_SC5314:1770096-1767373C, translated using codon table 12 (907 amino acids) Verified ORF;Ortholog(s) have m7G(5)pppN diphosphatase activity, mRNA binding activity and role in deadenylation-depen
1.27902				10853000	0.153814	orf19.3344	>orf19.3344 VPS17 CGDID:CAL0004139 COORDS:Ca21chr1_C_albicans_SC5314:311215-312774W, translated using codon table 12 (519 amino acids) Uncharacterized ORF;Ortholog(s) have phosphatidylinositol-3-phosphate binding, protein transporter activity and role in
1.18552				47489000	0.154053	orf19.6872	>orf19.6872 orf19.6872 CGDID:CAL0005865 COORDS:Ca21chr2_C_albicans_SC5314:1140248-1139328C, translated using codon table 12 (306 amino acids) Uncharacterized ORF;Putative protein of unknown function;Hap43p-repressed gene
1.10894				302650000	0.154311	orf19.4265	>orf19.4265 UAP1 CGDID:CAL0000289 COORDS:Ca21chr5_C_albicans_SC5314:565078-566538W, translated using codon table 12 (486 amino acids) Verified ORF;UDP-N-acetylglucosamine pyrophosphorylase, catalyzes biosynthesis of UDP-N-acetylglucosamine from UTP and N-
1.13722				148000000	0.154768	orf19.1441	>orf19.1441 orf19.1441 CGDID:CAL0004586 COORDS:Ca21chr2_C_albicans_SC5314:239103-237247C, translated using codon table 12 (618 amino acids) Uncharacterized ORF;Ortholog of <i>C. parapsilosis CDC317</i> : CPAR2_213950, <i>Candida tenuis NRRL Y-1498</i> : C
1.13711				125800000	0.154961	orf19.1706	>orf19.1706 MET18 CGDID:CAL0000763 COORDS:Ca21chr3_C_albicans_SC5314:311241-307972C, translated using codon table 12 (1089 amino acids) Uncharacterized ORF;Putative protein with a predicted role in nucleotide excision repair (NER) and RNA polymerase II (R
1.18432				87295000	0.155557	orf19.4798	>orf19.4798 orf19.4798 CGDID:CAL0004618 COORDS:Ca21chr1_C_albicans_SC5314:2064662-2061786C, translated using codon table 12 (958 amino acids) Uncharacterized ORF;Ortholog(s) have role in establishment of protein localization in plasma membrane and mitocho
1.27684				12597000	0.155823	orf19.4293	>orf19.4293 orf19.4293 CGDID:CAL0000383 COORDS:Ca21chr5_C_albicans_SC5314:614761-613610C, translated using codon table 12 (383 amino acids) Uncharacterized ORF;Ortholog(s) have role in iron-sulfur cluster assembly, ribosomal large subunit export from nucl
1.13574				187510000	0.157385	orf19.1526	>orf19.1526 SNF2 CGDID:CAL0005444 COORDS:Ca21chr2_C_albicans_SC5314:410274-415346W, translated using codon table 12 (1690 amino acids) Verified ORF;Protein involved in transcriptional regulation;ortholog of S. cerevisiae Snf2p, which is the catalytic sub
1.10738				268080000	0.158077	orf19.1525	>orf19.1525 orf19.1525 CGDID:CAL0005441 COORDS:Ca21chr2_C_albicans_SC5314:408210-409406W, translated using codon table 12 (398 amino acids) Uncharacterized ORF;Ortholog(s) have role in nuclear-transcribed mRNA catabolic process, nonsense-mediated decay an
1.18203				62982000	0.158454	orf19.4625	>orf19.4625 TOA2 CGDID:CAL0003642 COORDS:Ca21chr4_C_albicans_SC5314:334560-334952W, translated using codon table 12 (130 amino acids) Uncharacterized ORF;Putative TFIIA small subunit;protein abundance decreased in CAI4 strain compared to the SC5314 strai
1.10723				387810000	0.158462	orf19.7676	>orf19.7676 XYL2 CGDID:CAL0000985 COORDS:Ca21chrR_C_albicans_SC5314:2284606-2283524C, translated using codon table 12 (360 amino acids) Verified ORF;Putative D-xylulose reductase;immunogenic in mice;soluble protein in hyphae;induced by caspofungin, flu
1.2738				13995000	0.158655	orf19.1988	>orf19.1988 CDC45 CGDID:CAL0002709 COORDS:Ca21chrR_C_albicans_SC5314:1675738-1673999C, translated using codon table 12 (579 amino acids) Uncharacterized ORF;Putative DNA replication initiation factor;transcriptionally regulated by interaction with macrop
1.18187				40625000	0.158655	orf19.168	>orf19.168 orf19.168 CGDID:CAL0003194 COORDS:Ca21chrR_C_albicans_SC5314:569697-568822C, translated using codon table 12 (291 amino acids) Uncharacterized ORF;Ortholog(s) have role in U4 snRNA 3-end processing, exonucleolytic trimming to generate mature 3
1.13503				113510000	0.158655	orf19.6234	>orf19.6234 orf19.6234 CGDID:CAL0000477 COORDS:Ca21chr1_C_albicans_SC5314:1444495-1442891C, translated using codon table 12 (534 amino acids) Verified ORF;Putative U2 snRNP component;Hap43p-induced gene;mutation confers hypersensitivity to 5-fluorocytos
1.10715				279140000	0.158655	orf19.6776	>orf19.6776 GCD2 CGDID:CAL0004955 COORDS:Ca21chr3_C_albicans_SC5314:1661371-1662873W, translated using codon table 12 (500 amino acids) Uncharacterized ORF;Putative translation initiation factor;genes encoding ribosomal subunits, translation factors, and
1.07109				42100000000	0.158655	orf19.5788	>orf19.5788 EFT2 CGDID:CAL0001544 COORDS:Ca21chr2_C_albicans_SC5314:623592-626320W, translated using codon table 12 (842 amino acids) Verified ORF;Elongation Factor 2 (eEF2);GTPase;essential;highly expressed;target of sordarin antifungals;antigenic i
1.10706				459590000	0.158855	orf19.501	>orf19.501 orf19.501 CGDID:CAL0000046 COORDS:Ca21chrR_C_albicans_SC5314:932645-934501W, translated using codon table 12 (618 amino acids) Uncharacterized ORF;Ortholog(s) have nucleus, preribosome, large subunit precursor localization
1.27328				14318000	0.159146	orf19.1097	>orf19.1097 ALS2 CGDID:CAL0001283 COORDS:Ca21chr6_C_albicans_SC5314:971454-978542W, translated using codon table 12 (2362 amino acids) Verified ORF;ALS family protein;role in adhesion, biofilm formation, germ tube induction;expressed at infection of hum
1.07092				1204500000	0.159254	orf19.4021	>orf19.4021 orf19.4021 CGDID:CAL0004718 COORDS:Ca21chr5_C_albicans_SC5314:1150168-1149257C, translated using codon table 12 (303 amino acids) Uncharacterized ORF;Ortholog of <i>C. parapsilosis CDC317</i> : CPAR2_100250, <i>Debaryomyces hansenii CBS767</i>
1.10666				275460000	0.159854	orf19.5614	>orf19.5614 orf19.5614 CGDID:CAL0000560 COORDS:Ca21chr6_C_albicans_SC5314:685914-686771W, translated using codon table 12 (285 amino acids) Uncharacterized ORF;Putative ribonuclease H1;biofilm-induced gene;possibly an essential gene, disruptants not obt
1.1064				291630000	0.160491	orf19.6355	>orf19.6355 orf19.6355 CGDID:CAL0001341 COORDS:Ca21chr1_C_albicans_SC5314:2764811-2766364W, translated using codon table 12 (517 amino acids) Uncharacterized ORF;Ortholog(s) have role in ribosome biogenesis and cytosol, nucleolus localization
1.18031				50838000	0.160648	orf19.2172	>orf19.2172 ARA1 CGDID:CAL0005411 COORDS:Ca21chr2_C_albicans_SC5314:1648100-1649080W, translated using codon table 12 (326 amino acids) Verified ORF;D-Arabinose dehydrogenase;in dehydro-D-arabinono-1,4-lactone biosynthesis;NADP+ cofactor;active toward
1.17973				47332000	0.161387	orf19.3836	>orf19.3836 orf19.3836 CGDID:CAL0002034 COORDS:Ca21chr4_C_albicans_SC5314:964922-964170C, translated using codon table 12 (250 amino acids) Uncharacterized ORF;Ortholog(s) have cytoplasm localization
1.27026				22546000	0.162001	orf19.6855	>orf19.6855 orf19.6855 CGDID:CAL0005799 COORDS:Ca21chr1_C_albicans_SC5314:952391-954121W, translated using codon table 12 (576 amino acids) Uncharacterized ORF;Ortholog of <i>C. parapsilosis CDC317</i> : CPAR2_105410, <i>Candida tenuis NRRL Y-1498</i> : C
1.17909				80930000	0.162207	orf19.549	>orf19.549 orf19.549 CGDID:CAL0000218 COORDS:Ca21chrR_C_albicans_SC5314:1004064-1004687W, translated using codon table 12 (207 amino acids) Uncharacterized ORF;Ortholog(s) have structural constituent of ribosome activity and mitochondrial inner membrane,
1.1056				692600000	0.162481	orf19.7635	>orf19.7635 DRS1 CGDID:CAL0000864 COORDS:Ca21chrR_C_albicans_SC5314:2240886-2242727W, translated using codon table 12 (613 amino acids) Verified ORF;Putative nucleolar DEAD-box protein;Hap43p-induced gene;mutation confers hypersensitivity to 5-fluoroura
1.10443				297990000	0.165391	orf19.1687	>orf19.1687 orf19.1687 CGDID:CAL0000153 COORDS:Ca21chr3_C_albicans_SC5314:342684-344987W, translated using codon table 12 (767 amino acids) Uncharacterized ORF;Hap43p-induced gene;ortholog of <i>S. cerevisiae</i> PRP43, an RNA helicase in the DEAH-box fa
1.26563				9986200	0.166438	orf19.4570	>orf19.4570 orf19.4570 CGDID:CAL0002860 COORDS:Ca21chr4_C_albicans_SC5314:437692-437252C, translated using codon table 12 (146 amino acids) Uncharacterized ORF;Ortholog of <i>Debaryomyces hansenii CBS767</i> : DEHA2C14872g, <i>Candida dubliniensis CD36 </
1.26448				26603000	0.16755	orf19.1011	>orf19.1011 orf19.1011 CGDID:CAL0001040 COORDS:Ca21chrR_C_albicans_SC5314:1141357-1139375C, translated using codon table 12 (660 amino acids) Uncharacterized ORF;Ortholog(s) have alpha-1,2-mannosyltransferase activity, role in protein glycosylation and Go
1.10357				336570000	0.167559	orf19.5106	>orf19.5106 DIP2 CGDID:CAL0002491 COORDS:Ca21chr1_C_albicans_SC5314:1819339-1816394C, translated using codon table 12 (981 amino acids) Verified ORF;Putative small ribonucleoprotein complex;transposon mutation affects filamentous growth;physically inter
1.12968				169000000	0.168446	orf19.4705	>orf19.4705 orf19.4705 CGDID:CAL0004347 COORDS:Ca21chr4_C_albicans_SC5314:157322-158917W, translated using codon table 12 (531 amino acids) Uncharacterized ORF;Ortholog(s) have tRNA adenylyltransferase activity, role in tRNA 3-terminal CCA addition and c
1.26339				21431000	0.168613	orf19.715	>orf19.715 orf19.715 CGDID:CAL0001742 COORDS:Ca21chrR_C_albicans_SC5314:1390665-1391147W, translated using codon table 12 (160 amino acids) Uncharacterized ORF;Hap43p-induced gene
1.17386				65427000	0.169052	orf19.964	>orf19.964 SMC4 CGDID:CAL0003745 COORDS:Ca21chr5_C_albicans_SC5314:53010-48904C, translated using codon table 12 (1368 amino acids) Uncharacterized ORF;Ortholog(s) have chromatin binding activity, role in mitotic chromosome condensation, tRNA gene cluster
1.1029				469740000	0.169269	orf19.5906	>orf19.5906 ADE2 CGDID:CAL0003241 COORDS:Ca21chr3_C_albicans_SC5314:945230-943524C, translated using codon table 12 (568 amino acids) Verified ORF;Phosphoribosylaminoimadazole carboxylase;role in adenine biosynthesis;required for normal growth and virul
1.12817				97989000	0.171264	orf19.4306	>orf19.4306 orf19.4306 CGDID:CAL0000892 COORDS:Ca21chr5_C_albicans_SC5314:630575-629763C, translated using codon table 12 (270 amino acids) Uncharacterized ORF;Ortholog(s) have role in L-methionine salvage from methylthioadenosine and cytoplasm localizati
1.12815				114220000	0.171313	orf19.1711	>orf19.1711 END3 CGDID:CAL0000775 COORDS:Ca21chr3_C_albicans_SC5314:301513-302700W, translated using codon table 12 (395 amino acids) Uncharacterized ORF;Regulated by Gcn4p;induced in response to amino acid starvation (3-aminotriazole treatment)
1.12798				145710000	0.171632	orf19.3978	>orf19.3978 orf19.3978 CGDID:CAL0003101 COORDS:Ca21chr5_C_albicans_SC5314:1066976-1067689W, translated using codon table 12 (237 amino acids) Uncharacterized ORF;Ortholog(s) have nucleolus localization
1.10193				683530000	0.171756	orf19.5378	>orf19.5378 SCL1 CGDID:CAL0004386 COORDS:Ca21chr3_C_albicans_SC5314:145925-145182C, translated using codon table 12 (247 amino acids) Uncharacterized ORF;Proteasome subunit YC7alpha;protein present in exponential and stationary growth phase yeast culture
1.17099				47200000	0.172882	orf19.6862	>orf19.6862 orf19.6862 CGDID:CAL0005828 COORDS:Ca21chr4_C_albicans_SC5314:1134550-1132241C, translated using codon table 12 (769 amino acids) Verified ORF;Hap43p-induced gene;mutation confers hypersensitivity to 5-fluorocytosine (5-FC), 5-fluorouracil (5
1.12712				141410000	0.173258	orf19.4686	>orf19.4686 orf19.4686 CGDID:CAL0003825 COORDS:Ca21chr4_C_albicans_SC5314:206038-202436C, translated using codon table 12 (1200 amino acids) Uncharacterized ORF;Ortholog of <i>S. cerevisiae</i> : YIL151C, <i>C. glabrata CBS138</i> : CAGL0H06611g, <i>C. pa
1.12695				149970000	0.173589	orf19.2875	>orf19.2875 orf19.2875 CGDID:CAL0005200 COORDS:Ca21chr4_C_albicans_SC5314:1472576-1473400W, translated using codon table 12 (274 amino acids) Uncharacterized ORF;Hap43p-induced gene
1.12673				210570000	0.174004	orf19.3003	>orf19.3003 orf19.3003 CGDID:CAL0001326 COORDS:Ca21chr1_C_albicans_SC5314:645168-649614W, translated using codon table 12 (1417 amino acids) Verified ORF;Putative lipid-binding protein with a predicted role in calcium-dependent phospholipid-binding
1.25776				12591000	0.174159	orf19.4960	>orf19.4960 orf19.4960 CGDID:CAL0006358 COORDS:Ca21chr1_C_albicans_SC5314:2908446-2907412C, translated using codon table 12 (344 amino acids) Uncharacterized ORF;Ortholog(s) have spermine synthase activity, role in pantothenate biosynthetic process, sperm
1.06639				840640000	0.174767	orf19.3129	>orf19.3129 orf19.3129 CGDID:CAL0002270 COORDS:Ca21chr4_C_albicans_SC5314:1514961-1516337W, translated using codon table 12 (458 amino acids) Uncharacterized ORF;Putative chromatin remodelling complex protein;heterozygous null mutant displays sensitivity
1.06631				1132100000	0.175045	orf19.3959	>orf19.3959 SSD1 CGDID:CAL0003016 COORDS:Ca21chr5_C_albicans_SC5314:1029517-1025693C, translated using codon table 12 (1274 amino acids) Verified ORF;Protein with role in resistance to host antimicrobial peptides;virulence role in murine infection;funct
1.16896				69429000	0.175617	orf19.3549	>orf19.3549 CDC21 CGDID:CAL0005915 COORDS:Ca21chr2_C_albicans_SC5314:1069634-1070581W, translated using codon table 12 (315 amino acids) Uncharacterized ORF;Putative thymidylate synthase;flucytosine induced;transcription is downregulated in both interme
1.10039				479340000	0.17575	orf19.5797 orf19.1586	>orf19.5797 PLC2 CGDID:CAL0001556 COORDS:Ca21chr2_C_albicans_SC5314:614063-614950W, translated using codon table 12 (295 amino acids) Verified ORF;Phosphatidylinositol (PtdIns)-specific phospholipase C (PI-PLC);predicted type 2 membrane protein;role in,
1.16839				73149000	0.176401	orf19.6344	>orf19.6344 RBK1 CGDID:CAL0001321 COORDS:Ca21chr1_C_albicans_SC5314:2785714-2786886W, translated using codon table 12 (390 amino acids) Uncharacterized ORF;Ortholog(s) have cytosol, nucleus localization
1.12542				133400000	0.176511	orf19.6816	>orf19.6816 orf19.6816 CGDID:CAL0005659 COORDS:Ca21chr3_C_albicans_SC5314:1573418-1572570C, translated using codon table 12 (282 amino acids) Uncharacterized ORF;Ortholog(s) have alditol:NADP+ 1-oxidoreductase activity, role in D-xylose catabolic process,
1.06587				3156400000	0.176613	orf19.6858	>orf19.6858 EDC3 CGDID:CAL0005806 COORDS:Ca21chr4_C_albicans_SC5314:1126754-1125216C, translated using codon table 12 (512 amino acids) Verified ORF;Ortholog(s) have role in cytoplasmic mRNA processing body assembly, deadenylation-independent decapping of
1.16809				33691000	0.176803	orf19.6460	>orf19.6460 PEX1 CGDID:CAL0002247 COORDS:Ca21chr7_C_albicans_SC5314:534971-538246W, translated using codon table 12 (1091 amino acids) Uncharacterized ORF;Ortholog(s) have ATPase activity, protein heterodimerization activity, role in protein import into p
1.06567				1611100000	0.177322	orf19.7062	>orf19.7062 RPA135 CGDID:CAL0002109 COORDS:Ca21chr7_C_albicans_SC5314:92423-95923W, translated using codon table 12 (1166 amino acids) Uncharacterized ORF;Putative RNA polymerase I subunit A135;decreased expression in response to prostaglandins
1.09973				588060000	0.177495	orf19.7394	>orf19.7394 GDA1 CGDID:CAL0004837 COORDS:Ca21chr3_C_albicans_SC5314:1395621-1393822C, translated using codon table 12 (599 amino acids) Verified ORF;Golgi membrane GDPase, required for wild-type O-mannosylation, not N-glycosylation;required for wild-type
1.25426				18497000	0.177662	orf19.1418	>orf19.1418 SEC15 CGDID:CAL0004495 COORDS:Ca21chr4_C_albicans_SC5314:915503-918181W, translated using codon table 12 (892 amino acids) Verified ORF;Predicted exocyst subunit;cellular bud tip-associated protein;ortholog of <i>S. cerevisiae</i> SEC15
1.12443				181370000	0.178403	orf19.891	>orf19.891 orf19.891 CGDID:CAL0002924 COORDS:Ca21chr2_C_albicans_SC5314:698222-700558W, translated using codon table 12 (778 amino acids) Uncharacterized ORF;Putative AMP deaminase;possibly an essential gene, disruptants not obtained by UAU1 method
1.06508				1190000000	0.179432	orf19.2573	>orf19.2573 FRS1 CGDID:CAL0002521 COORDS:Ca21chrR_C_albicans_SC5314:400470-398692C, translated using codon table 12 (592 amino acids) Verified ORF;Phenylalanyl-tRNA synthetase;possible role in early cell wall biosynthesis;downregulated by phagocytosis b
1.06496				1259100000	0.179837	orf19.2288	>orf19.2288 CCT5 CGDID:CAL0006383 COORDS:Ca21chr2_C_albicans_SC5314:1486767-1488413W, translated using codon table 12 (548 amino acids) Uncharacterized ORF;T-complex protein 1, epsilon subunit;protein present in exponential and stationary growth phase ye
1.25208				20405000	0.179874	orf19.841	>orf19.841 orf19.841 CGDID:CAL0002748 COORDS:Ca21chr2_C_albicans_SC5314:804110-802020C, translated using codon table 12 (696 amino acids) Uncharacterized ORF;Ortholog(s) have role in Golgi vesicle transport and Golgi membrane localization
1.12367				204270000	0.179889	orf19.58	>orf19.58 RRP6 CGDID:CAL0000608 COORDS:Ca21chr1_C_albicans_SC5314:1057731-1055371C, translated using codon table 12 (786 amino acids) Verified ORF;Putative nuclear exosome exonuclease component;Hap43p-induced gene;mutation confers hypersensitivity to 5-
1.06486				1181200000	0.180207	orf19.3126	>orf19.3126 CCT6 CGDID:CAL0002267 COORDS:Ca21chr4_C_albicans_SC5314:1529615-1527936C, translated using codon table 12 (559 amino acids) Verified ORF;Putative cytosolic chaperonin Cct ring complex subunit;mutation confers hypersensitivity to cytochalasin
1.1653				63452000	0.180626	orf19.5139	>orf19.5139 orf19.5139 CGDID:CAL0002557 COORDS:Ca21chr7_C_albicans_SC5314:685158-687395W, translated using codon table 12 (745 amino acids) Uncharacterized ORF;Ortholog of <i>Candida dubliniensis CD36 </i> : CD36_72800, <i>Candida tropicalis MYA-3404</i>
1.09853				252210000	0.180666	orf19.2611	>orf19.2611 MCM6 CGDID:CAL0003376 COORDS:Ca21chrR_C_albicans_SC5314:459676-462318W, translated using codon table 12 (880 amino acids) Uncharacterized ORF;Putative MCM DNA replication initiation complex component;mRNA expression, peak at cell-cycle M/G1 p
1.12317				136410000	0.180851	orf19.7552	>orf19.7552 orf19.7552 CGDID:CAL0000085 COORDS:Ca21chrR_C_albicans_SC5314:2095287-2092669C, translated using codon table 12 (872 amino acids) Uncharacterized ORF;Putative U3-containing small subunit processome complex protein;Hap43p-induced gene;downreg
1.06467				1270000000	0.180885	orf19.6882.1	>orf19.6882.1 orf19.6882.1 CGDID:CAF0007090 COORDS:Ca21chr2_C_albicans_SC5314:1168075-1167296C, translated using codon table 12 (107 amino acids) Uncharacterized ORF;Ortholog(s) have structural constituent of ribosome activity, role in cytoplasmic transla
1.165				72715000	0.181047	orf19.1666	>orf19.1666 orf19.1666 CGDID:CAL0000072 COORDS:Ca21chr3_C_albicans_SC5314:396747-395152C, translated using codon table 12 (531 amino acids) Uncharacterized ORF;Predicted ORF in Assemblies 19, 20 and 21;transcription is induced in response to alpha pherom
1.2504				21636000	0.181579	orf19.2209	>orf19.2209 YVC1 CGDID:CAL0006175 COORDS:Ca21chr2_C_albicans_SC5314:1577496-1579523W, translated using codon table 12 (675 amino acids) Uncharacterized ORF;Protein similar to <i>S. cerevisiae</i> Yvc1p;transcription is repressed in response to alpha pher
1.1227				157660000	0.181765	orf19.290	>orf19.290 KRE5 CGDID:CAL0004102 COORDS:Ca21chr3_C_albicans_SC5314:634857-630514C, translated using codon table 12 (1447 amino acids) Verified ORF;Predicted UDP-glucose:glycoprotein glucosyltransferase;required for wild-type 1,6-beta-D-glucan biosynthesi
1.12266				108580000	0.181847	orf19.6448	>orf19.6448 orf19.6448 CGDID:CAL0002218 COORDS:Ca21chrR_C_albicans_SC5314:1876856-1879009W, translated using codon table 12 (717 amino acids) Uncharacterized ORF;Ortholog of <i>C. parapsilosis CDC317</i> : CPAR2_206180, <i>Candida tenuis NRRL Y-1498</i> :
1.09804				713600000	0.181987	orf19.7498	>orf19.7498 LEU1 CGDID:CAL0005750 COORDS:Ca21chrR_C_albicans_SC5314:91784-89454C, translated using codon table 12 (776 amino acids) Uncharacterized ORF;3-isopropylmalate dehydratase;antigenic in humans;decreased expression in hyphae vs yeast cells;alka
1.06426				3008400000	0.182359	orf19.1833	>orf19.1833 orf19.1833 CGDID:CAL0001653 COORDS:Ca21chr1_C_albicans_SC5314:2352602-2354041W, translated using codon table 12 (479 amino acids) Uncharacterized ORF;Ortholog(s) have pseudouridine synthase activity, role in box H/ACA snoRNA 3-end processing,
1.06419				1713800000	0.182616	orf19.1652 orf19.1655	>orf19.1652 POX1-3 CGDID:CAL0000034 COORDS:Ca21chr3_C_albicans_SC5314:431732-429603C, translated using codon table 12 (709 amino acids) Uncharacterized ORF;Predicted acyl-CoA oxidase;farnesol regulated;stationary phase enriched protein
1.12211				177380000	0.182936	orf19.3778	>orf19.3778 orf19.3778 CGDID:CAL0001276 COORDS:Ca21chr4_C_albicans_SC5314:1069672-1071231W, translated using codon table 12 (519 amino acids) Verified ORF;Hap43p-induced gene;mutation confers hypersensitivity to 5-fluorocytosine (5-FC), 5-fluorouracil (5
1.16246				84427000	0.184576	orf19.2434	>orf19.2434 NPL4 CGDID:CAL0001521 COORDS:Ca21chr1_C_albicans_SC5314:1282994-1281198C, translated using codon table 12 (598 amino acids) Uncharacterized ORF;Putative ubiquitin-binding protein;regulated by Gcn2p and Gcn4p
1.24727				21852000	0.184801	orf19.1802	>orf19.1802 orf19.1802 CGDID:CAL0001575 COORDS:Ca21chr4_C_albicans_SC5314:1192479-1190626C, translated using codon table 12 (617 amino acids) Uncharacterized ORF;Putative termination and polyadenylation protein;decreased expression in response to prostag
1.06355				1280000000	0.18495	orf19.1853 orf19.1061 orf19.6791	>orf19.1853 HHT2 CGDID:CAL0001692 COORDS:Ca21chrR_C_albicans_SC5314:1462310-1462720W, translated using codon table 12 (136 amino acids) Uncharacterized ORF;Putative histone H3;farnesol regulated;Hap43p-induced gene;>orf19.1061 HHT21 CGDID:CAL0001203 COO
1.24708				6688000	0.18499	orf19.4328	>orf19.4328 CCC2 CGDID:CAL0000959 COORDS:Ca21chr5_C_albicans_SC5314:668063-671677W, translated using codon table 12 (1204 amino acids) Verified ORF;Copper-transporting P-type ATPase of Golgi;required for wild-type iron assimilation (indirect effect via F
1.24705				5039900	0.185027	orf19.806	>orf19.806 VMA7 CGDID:CAL0002611 COORDS:Ca21chr2_C_albicans_SC5314:875328-874972C, translated using codon table 12 (118 amino acids) Verified ORF;Putative subunit of the V-ATPase complex, which is involved in control of vacuolar pH;highly similar to S. c
1.24694				11569000	0.18514	orf19.6163	>orf19.6163 CSE4 CGDID:CAL0006066 COORDS:Ca21chr3_C_albicans_SC5314:173053-173688W, translated using codon table 12 (211 amino acids) Verified ORF;Centromeric histone H3 variant involved in structural changes of centromeric nucleosomes during cell cycle;
1.06345				3896200000	0.185328	orf19.1738	>orf19.1738 UGP1 CGDID:CAL0000839 COORDS:Ca21chrR_C_albicans_SC5314:1018054-1016412C, translated using codon table 12 (500 amino acids) Verified ORF;Possible UTP-glucose-1-phosphaturidyl transferase;localizes to cell surface of yeast-form cells, but not
1.1206				126080000	0.18591	orf19.7260	>orf19.7260 orf19.7260 CGDID:CAL0003922 COORDS:Ca21chr1_C_albicans_SC5314:3171784-3171005C, translated using codon table 12 (259 amino acids) Uncharacterized ORF;Hap43p-repressed gene
1.09657				305790000	0.185927	orf19.3445	>orf19.3445 HOC1 CGDID:CAL0004993 COORDS:Ca21chr6_C_albicans_SC5314:276568-277755W, translated using codon table 12 (395 amino acids) Uncharacterized ORF;Protein with similarity to mannosyltransferases;similar to S. cerevisiae Hoc1p and C. albicans Och1p
1.06309				1426600000	0.186647	orf19.1453	>orf19.1453 SPT5 CGDID:CAL0004616 COORDS:Ca21chr2_C_albicans_SC5314:265953-268823W, translated using codon table 12 (956 amino acids) Verified ORF;Protein similar to S. cerevisiae Spt5p transcription elongation factor;transposon mutation affects filament
1.09613				340970000	0.187135	orf19.5776	>orf19.5776 TOM1 CGDID:CAL0001517 COORDS:Ca21chr2_C_albicans_SC5314:654222-644362C, translated using codon table 12 (3286 amino acids) Uncharacterized ORF;Putative E3 ubiquitin ligase;transcription is regulated by Nrg1p and Mig1p
1.06295				5332500000	0.187148	orf19.5791	>orf19.5791 IDH2 CGDID:CAL0001550 COORDS:Ca21chr2_C_albicans_SC5314:620950-622059W, translated using codon table 12 (369 amino acids) Uncharacterized ORF;Putative mitochondrial NAD-isocitrate dehydrogenase subunit;transcription upregulated by treatment w
1.16035				42023000	0.187547	orf19.3751	>orf19.3751 orf19.3751 CGDID:CAL0001213 COORDS:Ca21chrR_C_albicans_SC5314:490320-493304W, translated using codon table 12 (994 amino acids) Uncharacterized ORF;Putative serine/threonine protein kinase;possibly an essential gene, disruptants not obtained
1.0628				949880000	0.187714	orf19.6810	>orf19.6810 orf19.6810 CGDID:CAL0005649 COORDS:Ca21chr3_C_albicans_SC5314:1582861-1580930C, translated using codon table 12 (643 amino acids) Uncharacterized ORF;Ortholog(s) have protein serine/threonine phosphatase activity and role in establishment or m
1.09582				427540000	0.187978	orf19.2095	>orf19.2095 orf19.2095 CGDID:CAL0004568 COORDS:Ca21chr2_C_albicans_SC5314:49686-47587C, translated using codon table 12 (699 amino acids) Uncharacterized ORF;Ortholog(s) have role in negative regulation of transcription from RNA polymerase II promoter in
1.24333				27112000	0.188894	orf19.2722	>orf19.2722 CGR1 CGDID:CAL0004197 COORDS:Ca21chr4_C_albicans_SC5314:579236-578214C, translated using codon table 12 (340 amino acids) Verified ORF;Negative regulator of yeast-form growth;HSP70 family member;induced by growth cessation at yeast-hyphal tr
1.0622				2257300000	0.189931	orf19.2720	>orf19.2720 orf19.2720 CGDID:CAL0004195 COORDS:Ca21chr4_C_albicans_SC5314:580782-582416W, translated using codon table 12 (544 amino acids) Uncharacterized ORF;Ortholog(s) have unfolded protein binding activity, role in protein folding and chaperonin-cont
1.09494				741620000	0.190378	orf19.1030	>orf19.1030 orf19.1030 CGDID:CAL0001110 COORDS:Ca21chr1_C_albicans_SC5314:796893-795613C, translated using codon table 12 (426 amino acids) Uncharacterized ORF;Putative peptidyl-prolyl cis-trans isomerase
1.09465				417060000	0.191174	orf19.139	>orf19.139 TRA1 CGDID:CAL0003086 COORDS:Ca21chr6_C_albicans_SC5314:254562-266027W, translated using codon table 12 (3821 amino acids) Verified ORF;Subunit of the NuA4 histone acetyltransferase complex
1.06172				3310900000	0.191712	orf19.2525	>orf19.2525 LYS12 CGDID:CAL0002415 COORDS:Ca21chrR_C_albicans_SC5314:332030-333160W, translated using codon table 12 (376 amino acids) Uncharacterized ORF;Putative mitochondrial homoisocitrate dehydrogenase;clade-associated gene expression;protein level
1.11611				98998000	0.194952	orf19.1755	>orf19.1755 SET2 CGDID:CAL0000871 COORDS:Ca21chr2_C_albicans_SC5314:2111839-2109305C, translated using codon table 12 (844 amino acids) Uncharacterized ORF;Ortholog(s) have histone methyltransferase activity (H3-K36 specific) activity
1.06084				964310000	0.19504	orf19.3616	>orf19.3616 ERG9 CGDID:CAL0000316 COORDS:Ca21chr2_C_albicans_SC5314:1752011-1753357W, translated using codon table 12 (448 amino acids) Verified ORF;Putative farnesyl-diphosphate farnesyl transferase (squalene synthase) involved in the sterol biosynthesis
1.06079				797730000	0.195226	orf19.2571	>orf19.2571 SEC4 CGDID:CAL0002519 COORDS:Ca21chrR_C_albicans_SC5314:397884-397252C, translated using codon table 12 (210 amino acids) Verified ORF;Small GTPase of Rab family;role in post-Golgi secretion;possible C-terminal palmitoylation;downregulated
1.23732				4704100	0.195254	orf19.3100	>orf19.3100 orf19.3100 CGDID:CAL0002211 COORDS:Ca21chr4_C_albicans_SC5314:1566260-1563144C, translated using codon table 12 (1038 amino acids) Uncharacterized ORF;Hap43p-induced gene;transcription is repressed in response to alpha pheromone in SpiderM me
1.11536				98948000	0.196483	orf19.2330	>orf19.2330 orf19.2330 CGDID:CAL0000714 COORDS:Ca21chr1_C_albicans_SC5314:2407857-2409152W, translated using codon table 12 (431 amino acids) Verified ORF;Putative U3 snoRNA-associated protein;Hap43p-induced gene;transposon mutation affects filamentous
1.23615				12133000	0.196509	orf19.5133	>orf19.5133 ZCF29 CGDID:CAL0002550 COORDS:Ca21chr7_C_albicans_SC5314:700360-697043C, translated using codon table 12 (1105 amino acids) Verified ORF;Predicted zinc-finger protein;null mutant displays sensitivity to caffeine and menadione, and resistance
1.15394				83184000	0.196756	orf19.4728	>orf19.4728 orf19.4728 CGDID:CAL0004407 COORDS:Ca21chr1_C_albicans_SC5314:1897223-1901365W, translated using codon table 12 (1380 amino acids) Uncharacterized ORF;Ortholog(s) have role in histone deacetylation, negative regulation of meiosis and Set3 comp
1.23544				16633000	0.19727	orf19.5040	>orf19.5040 orf19.5040 CGDID:CAL0001665 COORDS:Ca21chr4_C_albicans_SC5314:818048-819826W, translated using codon table 12 (592 amino acids) Uncharacterized ORF;Ortholog(s) have nucleocytoplasmic transporter activity, phospholipid binding, single-stranded
1.23522				24508000	0.197509	orf19.2834	>orf19.2834 RPD3 CGDID:CAL0005111 COORDS:Ca21chrR_C_albicans_SC5314:634439-632997C, translated using codon table 12 (480 amino acids) Verified ORF;Histone deacetylase;regulates frequency of white-to-opaque and opaque-to-white switching;greater expressio
1.15339				86343000	0.197553	orf19.1444	>orf19.1444 orf19.1444 CGDID:CAL0004592 COORDS:Ca21chr2_C_albicans_SC5314:244023-245591W, translated using codon table 12 (522 amino acids) Uncharacterized ORF;Ortholog(s) have phosphatidylinositol-4,5-bisphosphate binding activity, role in actin cortical
1.15285				60951000	0.198351	orf19.3920	>orf19.3920 orf19.3920 CGDID:CAL0002895 COORDS:Ca21chr5_C_albicans_SC5314:961504-962403W, translated using codon table 12 (299 amino acids) Uncharacterized ORF;Ortholog(s) have protein disulfide isomerase activity, protein disulfide oxidoreductase activit
1.09171				356050000	0.199392	orf19.665	>orf19.665 NEP1 CGDID:CAL0001059 COORDS:Ca21chr1_C_albicans_SC5314:2495756-2496559W, translated using codon table 12 (267 amino acids) Verified ORF;Ortholog(s) have RNA binding, protein homodimerization activity
1.0595				3938600000	0.200116	orf19.6294	>orf19.6294 MYO1 CGDID:CAL0000620 COORDS:Ca21chr5_C_albicans_SC5314:368537-362691C, translated using codon table 12 (1948 amino acids) Verified ORF;Component of actomyosin ring at neck of newly-emerged bud
1.05947				2334400000	0.200242	orf19.6213	>orf19.6213 SUI2 CGDID:CAL0000442 COORDS:Ca21chr1_C_albicans_SC5314:1484830-1485732W, translated using codon table 12 (300 amino acids) Uncharacterized ORF;Translation initiation factor eIF2, alpha chain;genes encoding ribosomal subunits, translation fac
1.11307				139590000	0.201227	orf19.7041	>orf19.7041 orf19.7041 CGDID:CAL0002053 COORDS:Ca21chr7_C_albicans_SC5314:148191-150485W, translated using codon table 12 (764 amino acids) Verified ORF;Putative pre-tRNA processing protein;heterozygous null mutant exhibits hypersensitivity to parnafungi
1.23147				7742500	0.201566	orf19.5162	>orf19.5162 BCK1 CGDID:CAL0002621 COORDS:Ca21chr7_C_albicans_SC5314:648125-652087W, translated using codon table 12 (1320 amino acids) Verified ORF;Protein similar to S. cerevisiae Bck1p MAP kinase kinase kinase of cell integrity pathway;mutant is hypers
1.15051				50192000	0.201783	orf19.7425	>orf19.7425 orf19.7425 CGDID:CAL0005490 COORDS:Ca21chr3_C_albicans_SC5314:1459099-1458032C, translated using codon table 12 (355 amino acids) Uncharacterized ORF;Ortholog(s) have uracil DNA N-glycosylase activity, role in DNA repair and mitochondrion, nuc
1.23033				21053000	0.202817	orf19.1492	>orf19.1492 PRP39 CGDID:CAL0004777 COORDS:Ca21chr2_C_albicans_SC5314:336574-338541W, translated using codon table 12 (655 amino acids) Uncharacterized ORF;Putative component of the U1 snRNP, involved in splicing;ortholog of S. cerevisiae PRP39;Hap43p-in
1.14869				77067000	0.204485	orf19.4603	>orf19.4603 ARL1 CGDID:CAL0003584 COORDS:Ca21chr4_C_albicans_SC5314:369996-369439C, translated using codon table 12 (185 amino acids) Verified ORF;Putative GTPase;mutation confers dose-dependent sensitivity to Brefeldin A
1.05818				1599200000	0.20525	orf19.3341	>orf19.3341 orf19.3341 CGDID:CAL0004134 COORDS:Ca21chr1_C_albicans_SC5314:308501-306633C, translated using codon table 12 (622 amino acids) Uncharacterized ORF;Putative tRNA-Arg synthetase;essential;genes encoding ribosomal subunits, translation factors
1.05772				34200000000	0.207022	orf19.7392	>orf19.7392 orf19.7392 CGDID:CAL0004832 COORDS:Ca21chr3_C_albicans_SC5314:1390000-1387982C, translated using codon table 12 (672 amino acids) Uncharacterized ORF;Ortholog(s) have ATP-dependent RNA helicase activity, RNA strand annealing activity
1.05768				1681100000	0.207183	orf19.2937	>orf19.2937 PMM1 CGDID:CAL0006021 COORDS:Ca21chr1_C_albicans_SC5314:524030-524788W, translated using codon table 12 (252 amino acids) Verified ORF;Phosphomannomutase;enzyme of O- and N-linked mannosylation;interconverts mannose-6-phosphate and mannose-l
1.14633				89312000	0.208023	orf19.2545	>orf19.2545 DOT6 CGDID:CAL0002464 COORDS:Ca21chrR_C_albicans_SC5314:361143-359341C, translated using codon table 12 (600 amino acids) Uncharacterized ORF;Putative protein with a predicted role in telomeric gene silencing and filamentation;repressed upon
1.08869				442950000	0.208036	orf19.2170	>orf19.2170 PHM7 CGDID:CAL0005406 COORDS:Ca21chr2_C_albicans_SC5314:1652255-1649472C, translated using codon table 12 (927 amino acids) Verified ORF;Putative transporter;fungal-specific (no human or murine homolog);Hog1p-downregulated;downregulated in
1.05742				7880800000	0.208222	orf19.1288	>orf19.1288 FOX2 CGDID:CAL0003065 COORDS:Ca21chr3_C_albicans_SC5314:160696-157976C, translated using codon table 12 (906 amino acids) Verified ORF;3-hydroxyacyl-CoA epimerase, required for fatty acid beta-oxidation;upregulated upon phagocytosis;transcri
1.05722				98700000000	0.209017	orf19.382 orf19.1435	>orf19.382 TEF2 CGDID:CAL0004916 COORDS:Ca21chr1_C_albicans_SC5314:1842606-1843982W, translated using codon table 12 (458 amino acids) Uncharacterized ORF;Translation elongation factor 1-alpha;genes encoding ribosomal subunits, translation factors, and t
1.22432				28588000	0.209454	orf19.414	>orf19.414 orf19.414 CGDID:CAL0005574 COORDS:Ca21chr1_C_albicans_SC5314:1152818-1155091W, translated using codon table 12 (757 amino acids) Uncharacterized ORF;Ortholog(s) have structural constituent of ribosome activity and mitochondrial small ribosomal
1.10826				160530000	0.211375	orf19.4297	>orf19.4297 CKB2 CGDID:CAL0000389 COORDS:Ca21chr5_C_albicans_SC5314:620248-621051W, translated using codon table 12 (267 amino acids) Verified ORF;Regulatory subunit of protein kinase CK2 (casein kinase II), beta subunit;null mutants are hypersensitive
1.08753				290170000	0.211421	orf19.6066	>orf19.6066 orf19.6066 CGDID:CAL0005169 COORDS:Ca21chr1_C_albicans_SC5314:66325-64697C, translated using codon table 12 (542 amino acids) Uncharacterized ORF;Ortholog(s) have endosome, integral to mitochondrial outer membrane, lipid particle localization
1.08735				306910000	0.211942	orf19.155	>orf19.155 URE2 CGDID:CAL0003152 COORDS:Ca21chr2_C_albicans_SC5314:987521-986487C, translated using codon table 12 (344 amino acids) Verified ORF;Functional homolog of S. cerevisiae Ure2p, which is a regulator of nitrogen utilization, and which also has a
1.22149				3914600	0.212622	orf19.6544	>orf19.6544 LPI9 CGDID:CAL0003186 COORDS:Ca21chr7_C_albicans_SC5314:380244-384338W, translated using codon table 12 (1364 amino acids) Uncharacterized ORF;Ortholog(s) have protein phosphatase 1 binding, protein phosphatase type 1 regulator activity and ro
1.14275				47783000	0.213452	orf19.2500	>orf19.2500 orf19.2500 CGDID:CAL0002351 COORDS:Ca21chr3_C_albicans_SC5314:194338-195480W, translated using codon table 12 (380 amino acids) Uncharacterized ORF;Has domain(s) with predicted transferase activity and role in biosynthetic process
1.14257				71911000	0.213728	orf19.2146	>orf19.2146 orf19.2146 CGDID:CAL0005349 COORDS:Ca21chr6_C_albicans_SC5314:1013409-1012261C, translated using codon table 12 (382 amino acids) Uncharacterized ORF;Ortholog(s) have histone acetyltransferase activity, histone binding activity, role in chroma
1.1422				35964000	0.214303	orf19.2043	>orf19.2043 orf19.2043 CGDID:CAL0004410 COORDS:Ca21chr2_C_albicans_SC5314:138754-137852C, translated using codon table 12 (300 amino acids) Uncharacterized ORF;Has domain(s) with predicted ATP binding, nucleoside-triphosphatase activity
1.14181				34654000	0.2149	orf19.3811	>orf19.3811 GYP1 CGDID:CAL0001941 COORDS:Ca21chr4_C_albicans_SC5314:1009631-1011325W, translated using codon table 12 (564 amino acids) Uncharacterized ORF;Putative Cis-golgi GTPase-activating protein;transcription is regulated by Nrg1p, Mig1p, and Tup1p
1.05561				5924100000	0.215377	orf19.6561	>orf19.6561 LAT1 CGDID:CAL0003237 COORDS:Ca21chr7_C_albicans_SC5314:352680-354113W, translated using codon table 12 (477 amino acids) Uncharacterized ORF;Putative dihydrolipoamide acetyltransferase component (E2) of pyruvate dehydrogenase complex;sumoyla
1.05561				1720000000	0.215377	orf19.7021	>orf19.7021 GPH1 CGDID:CAL0001970 COORDS:Ca21chr7_C_albicans_SC5314:195079-197781W, translated using codon table 12 (900 amino acids) Verified ORF;Putative glycogen phosphorylase with a role in glycogen metabolism;regulated by Ssk1p, Mig1p, Tup1p, Hap43p
1.21903				8164600	0.215402	orf19.6880	>orf19.6880 orf19.6880 CGDID:CAL0005896 COORDS:Ca21chr2_C_albicans_SC5314:1161404-1164073W, translated using codon table 12 (889 amino acids) Uncharacterized ORF;Ortholog(s) have role in CVT pathway, macroautophagy, peroxisome degradation, retrograde tran
1.21884				10050000	0.215616	orf19.3287	>orf19.3287 BUD22 CGDID:CAL0003419 COORDS:Ca21chrR_C_albicans_SC5314:167253-168632W, translated using codon table 12 (459 amino acids) Uncharacterized ORF;Putative protein with a predicted role in 18S rRNA maturation and small ribosomal subunit biogenesis
1.05556				2785900000	0.215617	orf19.6584	>orf19.6584 PRT1 CGDID:CAL0003307 COORDS:Ca21chr7_C_albicans_SC5314:305372-303153C, translated using codon table 12 (739 amino acids) Verified ORF;Putative translation initiation factor eIF3;mutation confers hypersensitivity to roridin A, verrucarin A;g
1.05553				987110000	0.215728	orf19.4888	>orf19.4888 orf19.4888 CGDID:CAL0005506 COORDS:Ca21chr1_C_albicans_SC5314:2245436-2246269W, translated using codon table 12 (277 amino acids) Uncharacterized ORF;Has domain(s) with predicted nucleic acid binding, nucleotide binding activity
1.2185				21726000	0.215993	orf19.4521	>orf19.4521 orf19.4521 CGDID:CAL0002684 COORDS:Ca21chr2_C_albicans_SC5314:906971-905961C, translated using codon table 12 (336 amino acids) Uncharacterized ORF;Predicted ORF in Assemblies 19, 20 and 21;hyphal-induced expression
1.08587				476530000	0.216303	orf19.5912	>orf19.5912 MAK21 CGDID:CAL0003265 COORDS:Ca21chr3_C_albicans_SC5314:962572-965772W, translated using codon table 12 (1066 amino acids) Verified ORF;Putative 66S pre-ribosomal particle subunit;mutation confers hypersensitivity to tubercidin (7-deazaadeno
1.21749				14349000	0.217148	orf19.2568	>orf19.2568 IFU5 CGDID:CAL0002506 COORDS:Ca21chrR_C_albicans_SC5314:395483-396193W, translated using codon table 12 (236 amino acids) Uncharacterized ORF;Predicted membrane protein;estradiol-induced;increased transcription associated with CDR1 and CDR2
1.08534				436870000	0.217881	orf19.1047	>orf19.1047 ERB1 CGDID:CAL0001157 COORDS:Ca21chr1_C_albicans_SC5314:864198-866747W, translated using codon table 12 (849 amino acids) Verified ORF;Protein with a predicted role in ribosomal large subunit biogenesis;mutation confers hypersensitivity to 5-
1.13984				85362000	0.217933	orf19.6094	>orf19.6094 VPS53 CGDID:CAL0005237 COORDS:Ca21chr1_C_albicans_SC5314:21714-19615C, translated using codon table 12 (699 amino acids) Uncharacterized ORF;Ortholog(s) have role in Golgi to vacuole transport, retrograde transport, endosome to Golgi and GARP
1.105				161320000	0.218443	orf19.1868	>orf19.1868 RNR22 CGDID:CAL0001735 COORDS:Ca21chr2_C_albicans_SC5314:1546130-1547314W, translated using codon table 12 (394 amino acids) Uncharacterized ORF;Putative ribonucleoside diphosphate reductase;shows colony morphology-related gene regulation by
1.13897				41326000	0.219281	orf19.944	>orf19.944 IFG3 CGDID:CAL0003688 COORDS:Ca21chr5_C_albicans_SC5314:81598-80483C, translated using codon table 12 (347 amino acids) Uncharacterized ORF;Putative D-amino acid oxidase
1.0545				4050500000	0.219871	orf19.1295	>orf19.1295 VAS1 CGDID:CAL0003105 COORDS:Ca21chr2_C_albicans_SC5314:1354350-1350991C, translated using codon table 12 (1119 amino acids) Uncharacterized ORF;Putative tRNA-Val synthetase;genes encoding ribosomal subunits, translation factors, and tRNA syn
1.2147				9226100	0.220334	orf19.7345	>orf19.7345 orf19.7345 CGDID:CAL0004639 COORDS:Ca21chrR_C_albicans_SC5314:2027614-2026610C, translated using codon table 12 (334 amino acids) Uncharacterized ORF;Ortholog(s) have ATP binding activity and cytosol, nucleus localization
1.13755				37952000	0.221499	orf19.4930	>orf19.4930 SPC3 CGDID:CAL0006274 COORDS:Ca21chr1_C_albicans_SC5314:2836345-2835767C, translated using codon table 12 (192 amino acids) Verified ORF;Essential protein;similar to S. cerevisiae Spc3p, a component of the signal peptidase complex required fo
1.08406				717940000	0.221709	orf19.7035	>orf19.7035 RFC2 CGDID:CAL0002015 COORDS:Ca21chr7_C_albicans_SC5314:156150-157241W, translated using codon table 12 (363 amino acids) Uncharacterized ORF;Putative heteropentameric replication factor C subunit;periodic mRNA expression, peak at cell-cycle
1.13711				66653000	0.222182	orf19.5342.1	>orf19.5342.1 MTR2 CGDID:CAL0006614 COORDS:Ca21chr2_C_albicans_SC5314:2193142-2192540C, translated using codon table 12 (181 amino acids) Uncharacterized ORF;Nuclear export protein;member of NTF2 family;monomeric in solution;interacts with Mex67p via t
1.13695				43821000	0.222439	orf19.844	>orf19.844 STE11 CGDID:CAL0002751 COORDS:Ca21chr2_C_albicans_SC5314:798201-795730C, translated using codon table 12 (823 amino acids) Uncharacterized ORF;Protein similar to S. cerevisiae Ste11p;mutants are sensitive to growth on H2O2 medium
1.0538				808520000	0.22271	orf19.2694	>orf19.2694 TYS1 CGDID:CAL0003549 COORDS:Ca21chr4_C_albicans_SC5314:621567-622796W, translated using codon table 12 (409 amino acids) Uncharacterized ORF;Putative tRNA-Tyr synthetase;genes encoding ribosomal subunits, translation factors, and tRNA synthe
1.21151				28861000	0.224012	orf19.1789	>orf19.1789 orf19.1789 CGDID:CAL0000969 COORDS:Ca21chr4_C_albicans_SC5314:1156891-1158354W, translated using codon table 12 (487 amino acids) Uncharacterized ORF;Ortholog(s) have mitochondrion localization
1.21049				25987000	0.225204	orf19.1675	>orf19.1675 orf19.1675 CGDID:CAL0000108 COORDS:Ca21chr3_C_albicans_SC5314:365359-366561W, translated using codon table 12 (400 amino acids) Uncharacterized ORF;Ortholog(s) have role in positive regulation of catalytic activity
1.1351				66167000	0.225338	orf19.4363	>orf19.4363 SGD1 CGDID:CAL0001070 COORDS:Ca21chrR_C_albicans_SC5314:809883-812918W, translated using codon table 12 (1011 amino acids) Uncharacterized ORF;Putative protein with a predicted role in small ribosomal subunit biogenesis;downregulated during c
1.05307				875070000	0.225721	orf19.5550	>orf19.5550 MRT4 CGDID:CAL0006176 COORDS:Ca21chr6_C_albicans_SC5314:570398-571090W, translated using codon table 12 (230 amino acids) Verified ORF;Putative mRNA turnover protein;Hap43p-induced gene;mutation confers hypersensitivity to tubercidin (7-deaz
1.053				902760000	0.225991	orf19.7655	>orf19.7655 RPO21 CGDID:CAL0000919 COORDS:Ca21chrR_C_albicans_SC5314:2260510-2265696W, translated using codon table 12 (1728 amino acids) Verified ORF;Protein similar to S. cerevisiae Rpo21p, RNA polymerase II;transposon mutation affects filamentous grow
1.08257				470370000	0.226215	orf19.239	>orf19.239 orf19.239 CGDID:CAL0003962 COORDS:Ca21chr3_C_albicans_SC5314:546179-542268C, translated using codon table 12 (1303 amino acids) Uncharacterized ORF;Putative ATP-dependent helicase;induced by nitric oxide
1.20853				12272000	0.227485	orf19.2334	>orf19.2334 BIG1 CGDID:CAL0000722 COORDS:Ca21chr1_C_albicans_SC5314:2398600-2399568W, translated using codon table 12 (322 amino acids) Verified ORF;Endoplasmic reticulum (ER) protein required for beta-1,6-glucan synthesis, filamentation, adhesion, and vi
1.20771				15313000	0.228447	orf19.5219	>orf19.5219 IRA2 CGDID:CAL0003508 COORDS:Ca21chr1_C_albicans_SC5314:2717074-2709143C, translated using codon table 12 (2643 amino acids) Uncharacterized ORF;Ortholog(s) have Ras GTPase activator activity and role in negative regulation of Ras protein sign
1.20764				16241000	0.228529	orf19.7074	>orf19.7074 orf19.7074 CGDID:CAL0002142 COORDS:Ca21chr7_C_albicans_SC5314:75454-74657C, translated using codon table 12 (265 amino acids) Uncharacterized ORF;Ortholog(s) have RNA polymerase II transcription factor recruiting transcription factor activity,
1.08171				371140000	0.228835	orf19.4751	>orf19.4751 orf19.4751 CGDID:CAL0004475 COORDS:Ca21chr1_C_albicans_SC5314:1938588-1939475W, translated using codon table 12 (295 amino acids) Uncharacterized ORF;Ortholog(s) have structural constituent of ribosome activity and mitochondrial small ribosoma
1.13274				33681000	0.229081	orf19.3679	>orf19.3679 orf19.3679 CGDID:CAL0000455 COORDS:Ca21chr1_C_albicans_SC5314:463884-462874C, translated using codon table 12 (336 amino acids) Uncharacterized ORF;Putative protein of unknown function;stationary phase enriched protein
1.13186				49930000	0.230475	orf19.3623	>orf19.3623 SMC2 CGDID:CAL0000340 COORDS:Ca21chr2_C_albicans_SC5314:1732194-1735709W, translated using codon table 12 (1171 amino acids) Uncharacterized ORF;Protein similar to S. cerevisiae Smc2p, which is a component of the condensin complex involved in
1.0517				1935500000	0.231384	orf19.1236	>orf19.1236 orf19.1236 CGDID:CAL0002882 COORDS:Ca21chr4_C_albicans_SC5314:1213108-1212143C, translated using codon table 12 (321 amino acids) Uncharacterized ORF;Ortholog(s) have role in endocytosis, establishment or maintenance of actin cytoskeleton pola
1.20497				31834000	0.231661	orf19.643	>orf19.643 orf19.643 CGDID:CAL0001006 COORDS:Ca21chrR_C_albicans_SC5314:1105224-1109060W, translated using codon table 12 (1278 amino acids) Uncharacterized ORF;Ortholog(s) have role in apoptotic process, mitotic spindle elongation, sister chromatid biori
1.20486				29710000	0.2318	orf19.5441	>orf19.5441 ULP3 CGDID:CAL0005258 COORDS:Ca21chr3_C_albicans_SC5314:38813-36189C, translated using codon table 12 (874 amino acids) Verified ORF;SUMO deconjugation enzyme that removes the small ubiquitin-like modifier (SUMO) from proteins
1.13099				69965000	0.231874	orf19.7638	>orf19.7638 PRO1 CGDID:CAL0000866 COORDS:Ca21chrR_C_albicans_SC5314:2245865-2247136W, translated using codon table 12 (423 amino acids) Uncharacterized ORF;Putative gamma-glutamyl kinase;transcription is regulated by Nrg1p;regulated by Gcn2p and Gcn4p;
1.05153				1777400000	0.232115	orf19.3206	>orf19.3206 CCT7 CGDID:CAL0003198 COORDS:Ca21chr5_C_albicans_SC5314:384157-382508C, translated using codon table 12 (549 amino acids) Uncharacterized ORF;Cytosolic chaperonin Cct ring complex;protein is present in exponential and stationary growth phase
1.08026				287090000	0.233304	orf19.6991	>orf19.6991 PRE3 CGDID:CAL0000411 COORDS:Ca21chr3_C_albicans_SC5314:1243214-1243858W, translated using codon table 12 (214 amino acids) Verified ORF;Putative beta-1 proteasome subunit;macrophage-induced protein;regulated by Gcn2p and Gcn4p;GlcNAc-induc
1.12968				45136000	0.233981	orf19.966	>orf19.966 orf19.966 CGDID:CAL0003746 COORDS:Ca21chr5_C_albicans_SC5314:47854-48873W, translated using codon table 12 (339 amino acids) Uncharacterized ORF;Ortholog(s) have role in tRNA modification and mitochondrion localization
1.07997				700850000	0.234219	orf19.2917	>orf19.2917 orf19.2917 CGDID:CAL0005973 COORDS:Ca21chr4_C_albicans_SC5314:1388086-1386506C, translated using codon table 12 (526 amino acids) Verified ORF;Putative GTPase;heterozygous null mutant exhibits resistance to parnafungin in the C. albicans fitn
1.12924				32464000	0.234686	orf19.2474	>orf19.2474 PRC3 CGDID:CAL0001608 COORDS:Ca21chr1_C_albicans_SC5314:1207750-1206098C, translated using codon table 12 (550 amino acids) Uncharacterized ORF;Putative carboxypeptidase Y precursor;transcription is regulated by Nrg1p and Mig1p;regulated by
1.05085				1653500000	0.234965	orf19.6126	>orf19.6126 KGD2 CGDID:CAL0005983 COORDS:Ca21chrR_C_albicans_SC5314:1609238-1610563W, translated using codon table 12 (441 amino acids) Uncharacterized ORF;Putative dihydrolipoamide S-succinyltransferase;transcriptionally regulated by iron;expression gr
1.12898				80034000	0.235099	orf19.2328	>orf19.2328 orf19.2328 CGDID:CAL0000701 COORDS:Ca21chr1_C_albicans_SC5314:2409985-2409149C, translated using codon table 12 (278 amino acids) Uncharacterized ORF;Ortholog of <i>C. parapsilosis CDC317</i> : CPAR2_210530, <i>Candida tenuis NRRL Y-1498</i> :
1.12856				71385000	0.235782	orf19.4346	>orf19.4346 orf19.4346 CGDID:CAL0001016 COORDS:Ca21chr5_C_albicans_SC5314:705913-699638C, translated using codon table 12 (2091 amino acids) Uncharacterized ORF;Ortholog(s) have protein anchor activity, role in COPII vesicle coating and ER to Golgi transp
1.07946				750880000	0.235805	orf19.2664	>orf19.2664 orf19.2664 CGDID:CAL0003493 COORDS:Ca21chr4_C_albicans_SC5314:686742-689441W, translated using codon table 12 (899 amino acids) Uncharacterized ORF;Ortholog(s) have role in interspecies interaction between organisms, positive regulation of tra
1.20111				7414400	0.236255	orf19.5159	>orf19.5159 DUG3 CGDID:CAL0002597 COORDS:Ca21chr7_C_albicans_SC5314:657444-656410C, translated using codon table 12 (344 amino acids) Uncharacterized ORF;Ortholog(s) have gamma-glutamyltransferase activity, omega peptidase activity, role in glutathione ca
1.07925				296980000	0.236471	orf19.7307	>orf19.7307 orf19.7307 CGDID:CAL0004510 COORDS:Ca21chrR_C_albicans_SC5314:1944876-1944019C, translated using codon table 12 (285 amino acids) Uncharacterized ORF;Putative oxidoreductase;similar to S. cerevisiae Pga3p;possible Kex2p substrate
1.20045				24055000	0.237039	orf19.4953	>orf19.4953 orf19.4953 CGDID:CAL0006329 COORDS:Ca21chr1_C_albicans_SC5314:2894367-2895263W, translated using codon table 12 (298 amino acids) Uncharacterized ORF;Ortholog(s) have ATPase activity, role in ER-associated protein catabolic process, invasive g
1.07905				250960000	0.237083	orf19.1232	>orf19.1232 VRG4 CGDID:CAL0002875 COORDS:Ca21chr1_C_albicans_SC5314:1675356-1674241C, translated using codon table 12 (371 amino acids) Verified ORF;GDP-mannose transporter;essential;required for glycosylation, hyphal growth;functional homolog of S. ce
1.12766				59138000	0.23725	orf19.7428	>orf19.7428 APN1 CGDID:CAL0005493 COORDS:Ca21chr3_C_albicans_SC5314:1462394-1463578W, translated using codon table 12 (364 amino acids) Uncharacterized ORF;Ortholog of S. cerevisiae Apn1p, which is an AP endonuclease;transcriptionally induced by interact
1.19911				20336000	0.238643	orf19.6577	>orf19.6577 FLU1 CGDID:CAL0003286 COORDS:Ca21chr7_C_albicans_SC5314:320557-322389W, translated using codon table 12 (610 amino acids) Verified ORF;Multidrug efflux pump of the plasma membrane;MDR family member of the MFS (major facilitator superfamily) o
1.04997				7800000000	0.238694	orf19.3097	>orf19.3097 PDA1 CGDID:CAL0001531 COORDS:Ca21chr4_C_albicans_SC5314:1575542-1574337C, translated using codon table 12 (401 amino acids) Uncharacterized ORF;Putative pyruvate dehydrogenase alpha chain;fluconazole-induced;protein present in exponential an
1.0499				901920000	0.238969	orf19.3168	>orf19.3168 RPN8 CGDID:CAL0002371 COORDS:Ca21chr5_C_albicans_SC5314:455238-456230W, translated using codon table 12 (330 amino acids) Verified ORF;Putative regulatory subunit of the 26S proteasome;mutation confers hypersensitivity to amphotericin B;tran
1.09556				106950000	0.239607	orf19.3151	>orf19.3151 orf19.3151 CGDID:CAL0002336 COORDS:Ca21chr2_C_albicans_SC5314:1374602-1375768W, translated using codon table 12 (388 amino acids) Uncharacterized ORF;Has domain(s) with predicted catalytic activity, coenzyme binding, nucleotide binding activit
1.07817				269890000	0.239853	orf19.5947	>orf19.5947 SEC7 CGDID:CAL0003353 COORDS:Ca21chr3_C_albicans_SC5314:1030394-1024875C, translated using codon table 12 (1839 amino acids) Verified ORF;Putative guanine nucleotide exchange factor (GEF);mutation confers hypersensitivity to Brefeldin A;casp
1.04968				1925800000	0.239913	orf19.288	>orf19.288 MET13 CGDID:CAL0004097 COORDS:Ca21chr3_C_albicans_SC5314:630027-628183C, translated using codon table 12 (614 amino acids) Uncharacterized ORF;Putative methionine biosynthesis protein;ketoconazole-induced;amphotericin B repressed
1.12594				77317000	0.240046	orf19.2039	>orf19.2039 MSF1 CGDID:CAL0004392 COORDS:Ca21chr2_C_albicans_SC5314:144775-146115W, translated using codon table 12 (446 amino acids) Uncharacterized ORF;Putative phenylalanine-tRNA ligase;protein level decreases in stationary phase cultures;Hap43p-repr
1.19754				26747000	0.240529	orf19.232	>orf19.232 orf19.232 CGDID:CAL0003950 COORDS:Ca21chr3_C_albicans_SC5314:536061-535147C, translated using codon table 12 (304 amino acids) Uncharacterized ORF;RNA polymerase II mediator complex subunit;possibly an essential gene, disruptants not obtained
1.09502				90825000	0.240864	orf19.2712	>orf19.2712 HCA4 CGDID:CAL0004182 COORDS:Ca21chr4_C_albicans_SC5314:591191-588894C, translated using codon table 12 (765 amino acids) Uncharacterized ORF;Putative role in regulation of cell wall biogenesis;upregulated in biofilm;Hap43p-induced gene;pos
1.04941				1568600000	0.241074	orf19.5015	>orf19.5015 MYO2 CGDID:CAL0001595 COORDS:Ca21chr1_C_albicans_SC5314:3026140-3030825W, translated using codon table 12 (1561 amino acids) Verified ORF;Class V myosin;nonessential;sole class V myosin in C. albicans;required for wild-type actin cytoskelet
1.19649				16715000	0.241806	orf19.2241	>orf19.2241 PST1 CGDID:CAL0006260 COORDS:Ca21chr2_C_albicans_SC5314:1413266-1412670C, translated using codon table 12 (198 amino acids) Uncharacterized ORF;Putative 1,4-benzoquinone reductase;biofilm induced;hyphal-induced expression, regulated by Cyr1p
1.0946				96095000	0.241837	orf19.2695	>orf19.2695 UBR1 CGDID:CAL0003550 COORDS:Ca21chr4_C_albicans_SC5314:620665-615302C, translated using codon table 12 (1787 amino acids) Verified ORF;Protein similar to S. cerevisiae Ubr1p ubiquitin-protein ligase;transposon mutation affects filamentous gr
1.04913				811840000	0.242249	orf19.7234	>orf19.7234 orf19.7234 CGDID:CAL0003837 COORDS:Ca21chr1_C_albicans_SC5314:3139214-3140899W, translated using codon table 12 (561 amino acids) Uncharacterized ORF;Putative RSC chromatin remodeling complex component;possibly an essential gene, disruptants
1.12434				68014000	0.242664	orf19.6867	>orf19.6867 orf19.6867 CGDID:CAL0005840 COORDS:Ca21chr2_C_albicans_SC5314:1129080-1129469W, translated using codon table 12 (129 amino acids) Uncharacterized ORF;Predicted ORF in Assemblies 19, 20 and 21;transcription is repressed in response to alpha ph
1.12432				47216000	0.242693	orf19.5680	>orf19.5680 orf19.5680 CGDID:CAL0000728 COORDS:Ca21chr5_C_albicans_SC5314:19011-20093W, translated using codon table 12 (360 amino acids) Uncharacterized ORF;Predicted ORF in Assemblies 19, 20 and 21;possibly an essential gene, disruptants not obtained b
1.09402				172700000	0.243172	orf19.1516	>orf19.1516 orf19.1516 CGDID:CAL0005412 COORDS:Ca21chr2_C_albicans_SC5314:389652-392036W, translated using codon table 12 (794 amino acids) Uncharacterized ORF;Ortholog(s) have ubiquitin-specific protease activity, role in negative regulation of gluconeog
1.04866				2522200000	0.24428	orf19.7592	>orf19.7592 FAA4 CGDID:CAL0000241 COORDS:Ca21chrR_C_albicans_SC5314:2172618-2174708W, translated using codon table 12 (696 amino acids) Uncharacterized ORF;Predicted acyl CoA synthase
1.09339				208970000	0.244643	orf19.991	>orf19.991 DJP1 CGDID:CAL0003840 COORDS:Ca21chr1_C_albicans_SC5314:2319827-2321353W, translated using codon table 12 (508 amino acids) Uncharacterized ORF;Similar to bacterial DnaJ;reported to have a role in peroxisome biogenesis;transcriptionally regul
1.07647				428210000	0.245233	orf19.5650	>orf19.5650 PRO3 CGDID:CAL0000661 COORDS:Ca21chr4_C_albicans_SC5314:36235-35411C, translated using codon table 12 (274 amino acids) Uncharacterized ORF;Delta 1-pyrroline-5-carboxylate reductase;protein induced during the mating process;alkaline upregula
1.19328				21026000	0.245698	orf19.3922	>orf19.3922 orf19.3922 CGDID:CAL0002898 COORDS:Ca21chr5_C_albicans_SC5314:964315-963452C, translated using codon table 12 (287 amino acids) Uncharacterized ORF;Possible pyrimidine 5 nucleotidase;protein present in exponential and stationary growth phase
1.04817				9652400000	0.246391	orf19.7534	>orf19.7534 MIS12 CGDID:CAL0000024 COORDS:Ca21chrR_C_albicans_SC5314:21385-24462W, translated using codon table 12 (1025 amino acids) Uncharacterized ORF;Mitochondrial C1-tetrahydrofolate synthase precursor
1.07589				561540000	0.247069	orf19.2483	>orf19.2483 RIM1 CGDID:CAL0001631 COORDS:Ca21chr1_C_albicans_SC5314:1190013-1189582C, translated using codon table 12 (143 amino acids) Uncharacterized ORF;Putative single-stranded DNA-binding protein;protein level decreases in stationary phase cultures
1.19153				27872000	0.247835	orf19.3508	>orf19.3508 orf19.3508 CGDID:CAL0005782 COORDS:Ca21chr6_C_albicans_SC5314:417449-416316C, translated using codon table 12 (377 amino acids) Uncharacterized ORF;Putative protein of unknown function;stationary phase enriched protein
1.12091				38145000	0.248341	orf19.7363	>orf19.7363 KRE6 CGDID:CAL0004712 COORDS:Ca21chr3_C_albicans_SC5314:1306201-1308423W, translated using codon table 12 (740 amino acids) Verified ORF;Protein of beta-1,6-glucan synthesis;essential;type II membrane protein;N-glycosylation sites;change i
1.0474				1761900000	0.249742	orf19.7064	>orf19.7064 GLN4 CGDID:CAL0002113 COORDS:Ca21chr7_C_albicans_SC5314:91080-88681C, translated using codon table 12 (799 amino acids) Uncharacterized ORF;Putative tRNA-Gln synthetase;genes encoding ribosomal subunits, translation factors, tRNA synthetases
1.04737				2454900000	0.249837	orf19.401	>orf19.401 TCP1 CGDID:CAL0005536 COORDS:Ca21chr1_C_albicans_SC5314:1872960-1874624W, translated using codon table 12 (554 amino acids) Uncharacterized ORF;Chaperonin-containing T-complex subunit, transcription induced by alpha pheromone in SpiderM medium;
1.04733				3084200000	0.250028	orf19.3423	>orf19.3423 TIF3 CGDID:CAL0004924 COORDS:Ca21chr6_C_albicans_SC5314:337289-338656W, translated using codon table 12 (455 amino acids) Uncharacterized ORF;Putative translation initiation factor;genes encoding ribosomal subunits, translation factors, and t
1.07495				412280000	0.250087	orf19.1119	>orf19.1119 MTR10 CGDID:CAL0001884 COORDS:Ca21chr5_C_albicans_SC5314:833547-830668C, translated using codon table 12 (959 amino acids) Uncharacterized ORF;Putative importin, member of a family of fungal-specific nuclear importins;transcription is regulat
1.11876				58335000	0.251921	orf19.5873	>orf19.5873 POL1 CGDID:CAL0002431 COORDS:Ca21chr3_C_albicans_SC5314:897764-893352C, translated using codon table 12 (1470 amino acids) Uncharacterized ORF;Putative DNA directed DNA polymerase alpha;RNA abundance regulated by cell cycle, tyrosol and cell
1.08998				224580000	0.25263	orf19.7611	>orf19.7611 TRX1 CGDID:CAL0000819 COORDS:Ca21chrR_C_albicans_SC5314:2210638-2210327C, translated using codon table 12 (103 amino acids) Verified ORF;Thioredoxin, involved in response to reactive oxygen species;biofilm, benomyl, flucytosine, peroxide, Hap
1.07412				297270000	0.252762	orf19.6582	>orf19.6582 PRE10 CGDID:CAL0003302 COORDS:Ca21chr7_C_albicans_SC5314:310167-309231C, translated using codon table 12 (266 amino acids) Verified ORF;Alpha7 (C8) subunit of the 20S proteasome;multiple phosphorylated residues;transcription is induced upon
1.07408				313310000	0.252895	orf19.2267	>orf19.2267 RFA2 CGDID:CAL0006323 COORDS:Ca21chr2_C_albicans_SC5314:1452518-1453336W, translated using codon table 12 (272 amino acids) Uncharacterized ORF;Putative DNA replication factor A;RNA abundance regulated by cell cycle, tyrosol and cell density
1.04658				837990000	0.253323	orf19.6779	>orf19.6779 PRO2 CGDID:CAL0004966 COORDS:Ca21chr3_C_albicans_SC5314:1654769-1653429C, translated using codon table 12 (446 amino acids) Uncharacterized ORF;Putative gamma-glutamyl phosphate reductase with a predicted role in proline biosynthesis;regulate
1.08941				138570000	0.254003	orf19.4406	>orf19.4406 orf19.4406 CGDID:CAL0001717 COORDS:Ca21chr4_C_albicans_SC5314:1325647-1326561W, translated using codon table 12 (280 amino acids) Uncharacterized ORF;Ortholog(s) have cytosol, mitochondrion, nucleus localization
1.11713				64690000	0.254665	orf19.5522	>orf19.5522 orf19.5522 CGDID:CAL0006112 COORDS:Ca21chr6_C_albicans_SC5314:522447-521995C, translated using codon table 12 (150 amino acids) Uncharacterized ORF;Ortholog of <i>C. parapsilosis CDC317</i> : CPAR2_601700, <i>Candida tenuis NRRL Y-1498</i> : C
1.04619				1018900000	0.255002	orf19.3430	>orf19.3430 orf19.3430 CGDID:CAL0004951 COORDS:Ca21chr6_C_albicans_SC5314:319769-320803W, translated using codon table 12 (344 amino acids) Verified ORF;Plasma membrane-associated protein;physically interacts with TAP-tagged Nop1p
1.08892				120880000	0.255164	orf19.4354	>orf19.4354 MCM2 CGDID:CAL0001039 COORDS:Ca21chrR_C_albicans_SC5314:856674-853963C, translated using codon table 12 (903 amino acids) Uncharacterized ORF;Phosphorylated protein of unknown function;transcription is periodic with a peak at M/G1 phase of th
1.18543				7902200	0.255375	orf19.7232	>orf19.7232 IRR1 CGDID:CAL0003835 COORDS:Ca21chr1_C_albicans_SC5314:3138881-3135612C, translated using codon table 12 (1089 amino acids) Uncharacterized ORF;Putative cohesin complex subunit;cell-cycle regulated periodic mRNA expression
1.0888				108800000	0.255443	orf19.5348	>orf19.5348 TPS3 CGDID:CAL0004319 COORDS:Ca21chr2_C_albicans_SC5314:2198883-2201968W, translated using codon table 12 (1007 amino acids) Uncharacterized ORF;Putative regulatory subunit of trehalose-phosphate synthase;regulated by Efg1p;biofilm-repressed
1.07321				316330000	0.255708	orf19.350	>orf19.350 PRE9 CGDID:CAL0004819 COORDS:Ca21chr3_C_albicans_SC5314:751676-750921C, translated using codon table 12 (251 amino acids) Verified ORF;Alpha3 (C9) subunit of the 20S proteasome;transcription is regulated by Mig1p
1.04579				7281600000	0.256785	orf19.1378	>orf19.1378 SUP35 CGDID:CAL0003914 COORDS:Ca21chr2_C_albicans_SC5314:1985719-1987884W, translated using codon table 12 (721 amino acids) Verified ORF;Translation factor eRF3;shows prion-like aggregation in some, not all, studies;partially complements S.
1.07284				373650000	0.256907	orf19.2437	>orf19.2437 ARC35 CGDID:CAL0001527 COORDS:Ca21chr1_C_albicans_SC5314:1274555-1273515C, translated using codon table 12 (346 amino acids) Verified ORF;Putative ARP2/3 complex subunit;shows colony morphology-related gene regulation by Ssn6p;mutation confe
1.18345				25173000	0.257849	orf19.5772	>orf19.5772 orf19.5772 CGDID:CAL0001511 COORDS:Ca21chr6_C_albicans_SC5314:856798-855782C, translated using codon table 12 (338 amino acids) Uncharacterized ORF;Ortholog(s) have role in histone exchange and Swr1 complex localization
1.04541				4580100000	0.258486	orf19.2560	>orf19.2560 CDC60 CGDID:CAL0002497 COORDS:Ca21chrR_C_albicans_SC5314:387582-384289C, translated using codon table 12 (1097 amino acids) Verified ORF;Cytosolic leucyl tRNA synthetase;conserved amino acid and ATP binding class I signature, tRNA binding, pr
1.04537				41300000000	0.258653	orf19.1149	>orf19.1149 MRF1 CGDID:CAL0002010 COORDS:Ca21chr1_C_albicans_SC5314:2563794-2562715C, translated using codon table 12 (359 amino acids) Uncharacterized ORF;Putative mitochondrial respiratory protein;induced by farnesol, benomyl treatment, nitric oxide, c
1.08731				241620000	0.258998	orf19.1754	>orf19.1754 orf19.1754 CGDID:CAL0000870 COORDS:Ca21chr2_C_albicans_SC5314:2113841-2112408C, translated using codon table 12 (477 amino acids) Uncharacterized ORF;Putative calmodulin-dependent protein kinase;possibly an essential gene, disruptants not obt
1.04513				1618400000	0.259729	orf19.2422	>orf19.2422 ARC1 CGDID:CAL0001493 COORDS:Ca21chrR_C_albicans_SC5314:698444-699553W, translated using codon table 12 (369 amino acids) Uncharacterized ORF;Putative G4 nucleic acid binding protein;macrophage/pseudohyphal-repressed;protein enriched in stat
1.08673				234280000	0.260397	orf19.5991	>orf19.5991 orf19.5991 CGDID:CAL0003464 COORDS:Ca21chr3_C_albicans_SC5314:1107791-1105065C, translated using codon table 12 (908 amino acids) Uncharacterized ORF;Ortholog(s) have role in maturation of 5.8S rRNA from tricistronic rRNA transcript (SSU-rRNA,
1.08671				207710000	0.260436	orf19.1915	>orf19.1915 MPP10 CGDID:CAL0002520 COORDS:Ca21chr2_C_albicans_SC5314:11063-9360C, translated using codon table 12 (567 amino acids) Uncharacterized ORF;Putative SSU processome and 90S preribosome component;downregulated in core stress response;decreased
1.18122				27429000	0.260638	orf19.5340	>orf19.5340 orf19.5340 CGDID:CAL0004309 COORDS:Ca21chr2_C_albicans_SC5314:2188145-2189791W, translated using codon table 12 (548 amino acids) Uncharacterized ORF;Ortholog(s) have Rab GTPase activator activity and role in ER to Golgi vesicle-mediated trans
1.18103				13084000	0.26088	orf19.2857	>orf19.2857 orf19.2857 CGDID:CAL0005155 COORDS:Ca21chrR_C_albicans_SC5314:685210-682679C, translated using codon table 12 (843 amino acids) Uncharacterized ORF;Ortholog(s) have ATP-dependent DNA helicase activity
1.11343				57258000	0.260953	orf19.1621	>orf19.1621 GPA2 CGDID:CAL0006364 COORDS:Ca21chr3_C_albicans_SC5314:486479-484971C, translated using codon table 12 (502 amino acids) Verified ORF;G-protein alpha subunit;regulates filamentous growth;involved in cAMP-mediated glucose signaling;reports
1.04474				1503700000	0.261463	orf19.3268	>orf19.3268 TMA19 CGDID:CAL0003369 COORDS:Ca21chrR_C_albicans_SC5314:198468-197965C, translated using codon table 12 (167 amino acids) Uncharacterized ORF;Cell wall protein, ortholog of S. cerevisiae Tma19p (Ykl065cp)
1.08621				207880000	0.261648	orf19.6801	>orf19.6801 RPD31 CGDID:CAL0005608 COORDS:Ca21chr3_C_albicans_SC5314:1600943-1602676W, translated using codon table 12 (577 amino acids) Verified ORF;Putative histone deacetylase;involved in regulation of white-opaque switching
1.11274				34815000	0.262127	orf19.1961	>orf19.1961 orf19.1961 CGDID:CAL0002634 COORDS:Ca21chr5_C_albicans_SC5314:236456-234864C, translated using codon table 12 (530 amino acids) Uncharacterized ORF;Planktonic growth-induced gene
1.11272				46435000	0.262152	orf19.6901	>orf19.6901 orf19.6901 CGDID:CAL0000115 COORDS:Ca21chr7_C_albicans_SC5314:249862-250770W, translated using codon table 12 (302 amino acids) Uncharacterized ORF;Ortholog(s) have enzyme activator activity, m7G(5)pppN diphosphatase activity
1.07108				346240000	0.26269	orf19.6414.3	>orf19.6414.3 TPM2 CGDID:CAF0007078 COORDS:Ca21chrR_C_albicans_SC5314:1826988-1827860W, translated using codon table 12 (161 amino acids) Uncharacterized ORF;Putative tropomyosin isoform 2;regulated by Gcn4p;repressed under amino acid starvation;macrop
1.11236				56043000	0.262774	orf19.4781	>orf19.4781 GRP1 CGDID:CAL0004583 COORDS:Ca21chr1_C_albicans_SC5314:2028376-2027363C, translated using codon table 12 (337 amino acids) Uncharacterized ORF;Protein similar to dihydroflavonol-4-reductases
1.04422				1234500000	0.263756	orf19.7481	>orf19.7481 MDH1 CGDID:CAL0005697 COORDS:Ca21chrR_C_albicans_SC5314:128189-127176C, translated using codon table 12 (337 amino acids) Verified ORF;Malate dehydrogenase, mitochondrial;transcription regulated by Mig1p, Tup1p, white-opaque switching;induce
1.07072				326950000	0.263881	orf19.3235	>orf19.3235 orf19.3235 CGDID:CAL0003289 COORDS:Ca21chrR_C_albicans_SC5314:275367-276209W, translated using codon table 12 (280 amino acids) Uncharacterized ORF;Putative F-actin capping protein subunit alpha;possibly an essential gene, disruptants not obt
1.04417				928520000	0.264003	orf19.6327	>orf19.6327 HET1 CGDID:CAL0001291 COORDS:Ca21chr6_C_albicans_SC5314:12549-11956C, translated using codon table 12 (197 amino acids) Verified ORF;Putative sphingolipid transfer protein involved in localization of glucosylceramide, which is important for vi
1.0441				3568200000	0.264321	orf19.2709	>orf19.2709 ZUO1 CGDID:CAL0004174 COORDS:Ca21chr4_C_albicans_SC5314:597368-596085C, translated using codon table 12 (427 amino acids) Uncharacterized ORF;Protein similar to S. cerevisiae Zuo1p, which is a cytosolic ribosome-associated chaperone;likely to
1.04393				34500000000	0.265082	orf19.6515	>orf19.6515 HSP90 CGDID:CAL0003079 COORDS:Ca21chr7_C_albicans_SC5314:439531-441654W, translated using codon table 12 (707 amino acids) Verified ORF;Essential chaperone, regulates several signal transduction pathways and temperature-induced morphogenesis;
1.11086				52104000	0.265344	orf19.1890	>orf19.1890 orf19.1890 CGDID:CAL0001823 COORDS:Ca21chr2_C_albicans_SC5314:1514712-1516178W, translated using codon table 12 (488 amino acids) Uncharacterized ORF;Ortholog(s) have role in medium-chain fatty acid biosynthetic process
1.17714				7743000	0.265802	orf19.793	>orf19.793 CAK1 CGDID:CAL0002021 COORDS:Ca21chr2_C_albicans_SC5314:895179-896198W, translated using codon table 12 (339 amino acids) Verified ORF;Monomeric CDK-activating kinase;functional homolog of S. cerevisiae Cak1p;phosphorylates cyclin-free human
1.17708				16254000	0.265881	orf19.5510	>orf19.5510 orf19.5510 CGDID:CAL0006086 COORDS:Ca21chr6_C_albicans_SC5314:503452-507309W, translated using codon table 12 (1285 amino acids) Uncharacterized ORF;Ortholog(s) have role in chromatin silencing at telomere, negative regulation of transcription
1.1764				11062000	0.266746	orf19.4634	>orf19.4634 orf19.4634 CGDID:CAL0003670 COORDS:Ca21chr4_C_albicans_SC5314:313048-314235W, translated using codon table 12 (395 amino acids) Uncharacterized ORF;Ortholog(s) have tRNA binding activity and role in protein urmylation, regulation of cell shape
1.06974				644400000	0.267108	orf19.92	>orf19.92 orf19.92 CGDID:CAL0000704 COORDS:Ca21chr6_C_albicans_SC5314:181089-178399C, translated using codon table 12 (896 amino acids) Uncharacterized ORF;Hap43p-repressed gene;increased expression in response to prostaglandins
1.0839				146240000	0.267256	orf19.6652	>orf19.6652 DBP8 CGDID:CAL0004058 COORDS:Ca21chrR_C_albicans_SC5314:1201128-1202450W, translated using codon table 12 (440 amino acids) Uncharacterized ORF;Protein similar to S. cerevisiae Dbp8p, an ATP-dependent helicase involved in rRNA processing;oxid
1.17531				9975200	0.268126	orf19.2026	>orf19.2026 orf19.2026 CGDID:CAL0004364 COORDS:Ca21chr2_C_albicans_SC5314:160795-158693C, translated using codon table 12 (700 amino acids) Uncharacterized ORF;Ortholog of <i>S. cerevisiae</i> UBP13, a putative ubiquitin carboxyl-terminal hydrolase;late-
1.0694				463190000	0.268255	orf19.4815	>orf19.4815 YTM1 CGDID:CAL0005315 COORDS:Ca21chr1_C_albicans_SC5314:2093301-2094701W, translated using codon table 12 (466 amino acids) Verified ORF;Protein similar to S. cerevisiae Ytm1p, which is involved in biogenesis of the large ribosomal subunit;tr
1.08336				113940000	0.268563	orf19.4191.1	>orf19.4191.1 orf19.4191.1 CGDID:CAF0007003 COORDS:Ca21chr4_C_albicans_SC5314:86317-89235W, translated using codon table 12 (972 amino acids) Uncharacterized ORF;Ortholog(s) have ubiquitin-ubiquitin ligase activity, role in ER-associated protein catabolic
1.17481				12703000	0.268767	orf19.4030	>orf19.4030 orf19.4030 CGDID:CAL0004759 COORDS:Ca21chr5_C_albicans_SC5314:1157239-1158513W, translated using codon table 12 (424 amino acids) Uncharacterized ORF;Ortholog(s) have DNA primase activity, single-stranded DNA binding activity, role in DNA repl
1.04306				7630000000	0.269008	orf19.5294	>orf19.5294 PDB1 CGDID:CAL0003677 COORDS:Ca21chr4_C_albicans_SC5314:886701-885562C, translated using codon table 12 (379 amino acids) Uncharacterized ORF;Putative pyruvate dehydrogenase;fluconazole-induced;protein level decreases in stationary phase cul
1.10867				72969000	0.269131	orf19.6951	>orf19.6951 orf19.6951 CGDID:CAL0000297 COORDS:Ca21chr3_C_albicans_SC5314:777434-779203W, translated using codon table 12 (589 amino acids) Uncharacterized ORF;Ortholog(s) have sphinganine-1-phosphate aldolase activity and role in calcium-mediated signali
1.06898				572310000	0.269658	orf19.7522	>orf19.7522 orf19.7522 CGDID:CAL0000002 COORDS:Ca21chrR_C_albicans_SC5314:34247-33075C, translated using codon table 12 (390 amino acids) Verified ORF;Hap43p-repressed gene;mutation confers hypersensitivity to amphotericin B
1.06895				617820000	0.269769	orf19.518	>orf19.518 orf19.518 CGDID:CAL0000089 COORDS:Ca21chrR_C_albicans_SC5314:958491-960632W, translated using codon table 12 (713 amino acids) Uncharacterized ORF;Ortholog(s) have tRNA (cytosine-5-)-methyltransferase activity, role in tRNA methylation and nucl
1.17399				7109100	0.269818	orf19.7034	>orf19.7034 orf19.7034 CGDID:CAL0002014 COORDS:Ca21chr7_C_albicans_SC5314:159808-157502C, translated using codon table 12 (768 amino acids) Uncharacterized ORF;Ortholog(s) have eukaryotic initiation factor 4E binding activity, role in negative regulation
1.10826				35623000	0.269852	orf19.1808	>orf19.1808 orf19.1808 CGDID:CAL0001584 COORDS:Ca21chrR_C_albicans_SC5314:1070731-1073841W, translated using codon table 12 (1036 amino acids) Uncharacterized ORF;Putative protein of unknown function, transcription is positively regulated by Tbf1p
1.04283				1661600000	0.270024	orf19.3941	>orf19.3941 URA7 CGDID:CAL0002977 COORDS:Ca21chr5_C_albicans_SC5314:995477-993756C, translated using codon table 12 (573 amino acids) Uncharacterized ORF;CTP synthase 1;flucytosine induced;protein present in exponential and stationary growth phase yeast
1.06887				392080000	0.270043	orf19.5832	>orf19.5832 HPT1 CGDID:CAL0002325 COORDS:Ca21chr2_C_albicans_SC5314:547558-546917C, translated using codon table 12 (213 amino acids) Uncharacterized ORF;Putative hypoxanthine-guanine phosphoribosyltransferase;protein abundance is affected by URA3 expres
1.06871				764230000	0.270563	orf19.2546	>orf19.2546 TRP2 CGDID:CAL0002466 COORDS:Ca21chrR_C_albicans_SC5314:363519-361881C, translated using codon table 12 (522 amino acids) Uncharacterized ORF;Putative anthranilate synthase with a predicted role in tryptophan biosynthesis;regulated by Gcn2p a
1.04263				1320300000	0.270925	orf19.238	>orf19.238 CCP1 CGDID:CAL0003960 COORDS:Ca21chr3_C_albicans_SC5314:541083-539983C, translated using codon table 12 (366 amino acids) Uncharacterized ORF;Similar to cytochrome-c peroxidase N terminus;negatively regulated by Rim101p or alkaline pH;transcr
1.06855				357640000	0.271086	orf19.4492	>orf19.4492 orf19.4492 CGDID:CAL0002033 COORDS:Ca21chr2_C_albicans_SC5314:956939-958219W, translated using codon table 12 (426 amino acids) Uncharacterized ORF;Ortholog(s) have role in nuclear division, rRNA processing and nuclear periphery, nucleolus, pr
1.04255				821060000	0.271273	orf19.734 orf19.6116	>orf19.734 GLK1 CGDID:CAL0001803 COORDS:Ca21chrR_C_albicans_SC5314:1559103-1560521W, translated using codon table 12 (472 amino acids) Verified ORF;Putative glucokinase;transcription regulated upon yeast-hyphal switch;regulated by Efg1p;fluconazole-ind
1.10739				32647000	0.271359	orf19.2654	>orf19.2654 RMS1 CGDID:CAL0003473 COORDS:Ca21chr5_C_albicans_SC5314:734722-736380W, translated using codon table 12 (552 amino acids) Uncharacterized ORF;Putative lysine methyltransferase;Hap43p-induced gene;protein induced during the mating process;po
1.10629				36909000	0.273279	orf19.1190	>orf19.1190 orf19.1190 CGDID:CAL0002155 COORDS:Ca21chr6_C_albicans_SC5314:46683-43852C, translated using codon table 12 (943 amino acids) Uncharacterized ORF;Has domain(s) with predicted hydrogen ion transmembrane transporter activity, role in ATP hydroly
1.10606				48871000	0.27369	orf19.7291	>orf19.7291 orf19.7291 CGDID:CAL0004011 COORDS:Ca21chrR_C_albicans_SC5314:1914361-1915368W, translated using codon table 12 (335 amino acids) Uncharacterized ORF;Ortholog(s) have tRNA (adenine-N1-)-methyltransferase activity, role in tRNA methylation and
1.08113				197210000	0.274037	orf19.6766	>orf19.6766 orf19.6766 CGDID:CAL0004922 COORDS:Ca21chr3_C_albicans_SC5314:1675734-1676924W, translated using codon table 12 (396 amino acids) Uncharacterized ORF;Hap43p-induced gene;<I>S. cerevisiae</I> ortholog NOP13, a nucleolar protein found in prerib
1.17069				23969000	0.274057	orf19.6018	>orf19.6018 LRO1 CGDID:CAL0005049 COORDS:Ca21chr1_C_albicans_SC5314:170165-172261W, translated using codon table 12 (698 amino acids) Uncharacterized ORF;Ortholog(s) have phospholipid:diacylglycerol acyltransferase activity, role in lipid storage, triglyc
1.06745				413260000	0.274799	orf19.4641	>orf19.4641 NMT1 CGDID:CAL0003694 COORDS:Ca21chr4_C_albicans_SC5314:303654-305009W, translated using codon table 12 (451 amino acids) Verified ORF;Myristoyl-CoA:protein N-myristoyltransferase;attaches the fatty acid myristate to a small number of protein
1.10508				80017000	0.275393	orf19.3026	>orf19.3026 MAS1 CGDID:CAL0001369 COORDS:Ca21chr1_C_albicans_SC5314:690091-688688C, translated using codon table 12 (467 amino acids) Uncharacterized ORF;Putative mitochondrial processing protease;Hap43p-repressed gene;transcription is regulated by Nrg1
1.08038				136720000	0.275902	orf19.7488	>orf19.7488 orf19.7488 CGDID:CAL0005715 COORDS:Ca21chrR_C_albicans_SC5314:116160-115609C, translated using codon table 12 (183 amino acids) Uncharacterized ORF;Ortholog(s) have snoRNA binding activity and Mpp10 complex, small-subunit processome localizati
1.06708				269380000	0.276039	orf19.434	>orf19.434 PRD1 CGDID:CAL0005656 COORDS:Ca21chr1_C_albicans_SC5314:1115479-1113371C, translated using codon table 12 (702 amino acids) Uncharacterized ORF;Putative proteinase;transcription is regulated by Nrg1p, Mig1p, and Tup1p;Hog1p-induced;stationar
1.08028				92398000	0.276145	orf19.1161	>orf19.1161 PLD1 CGDID:CAL0002069 COORDS:Ca21chr1_C_albicans_SC5314:2542332-2547464W, translated using codon table 12 (1710 amino acids) Verified ORF;Phospholipase D1;required for phosphatidic acid and for most diacylglycerol production;required for wil
1.04135				2136900000	0.276765	orf19.4051	>orf19.4051 HTS1 CGDID:CAL0004839 COORDS:Ca21chr5_C_albicans_SC5314:1180961-1179456C, translated using codon table 12 (501 amino acids) Uncharacterized ORF;Putative tRNA-His synthetase;genes encoding ribosomal subunits, translation factors, tRNA syntheta
1.04123				7714900000	0.277337	orf19.5007	>orf19.5007 ACT1 CGDID:CAL0001571 COORDS:Ca21chr1_C_albicans_SC5314:3011464-3013252W, translated using codon table 12 (376 amino acids) Verified ORF;Actin;gene has intron;transcriptionally regulated by growth phase and by starvation;localizes to polari
1.04122				1796800000	0.277382	orf19.5493	>orf19.5493 GSP1 CGDID:CAL0005360 COORDS:Ca21chr2_C_albicans_SC5314:1281391-1280747C, translated using codon table 12 (214 amino acids) Verified ORF;Small RAN G-protein;essential;prenylation not predicted;overproduction rescues S. cerevisiae gsp1 viabi
1.07971				223070000	0.277568	orf19.590	>orf19.590 orf19.590 CGDID:CAL0000361 COORDS:Ca21chrR_C_albicans_SC5314:1757970-1757071C, translated using codon table 12 (299 amino acids) Uncharacterized ORF;Putative thiamine biosynthesis enzyme;decreased expression in an ssr1 null mutant;protein pre
1.10372				85990000	0.277786	orf19.5734	>orf19.5734 POP2 CGDID:CAL0001422 COORDS:Ca21chr6_C_albicans_SC5314:776769-775291C, translated using codon table 12 (492 amino acids) Verified ORF;Component of the Ccr4-Pop2 mRNA deadenylase;heterozygous null mutant exhibits resistance to parnafungin and
1.07946				153810000	0.278179	orf19.5657	>orf19.5657 SWI1 CGDID:CAL0000671 COORDS:Ca21chr4_C_albicans_SC5314:48100-45137C, translated using codon table 12 (987 amino acids) Verified ORF;Protein involved in transcription regulation;ortholog of S. cerevisiae Swi1p, which is a subunit of the SWI/S
1.10316				42935000	0.278769	orf19.5442	>orf19.5442 orf19.5442 CGDID:CAL0005259 COORDS:Ca21chr3_C_albicans_SC5314:36054-34558C, translated using codon table 12 (498 amino acids) Uncharacterized ORF;Ortholog of <i>C. parapsilosis CDC317</i> : CPAR2_504040, <i>Candida tenuis NRRL Y-1498</i> : CAN
1.0409				3745700000	0.278817	orf19.2489	>orf19.2489 orf19.2489 CGDID:CAL0001639 COORDS:Ca21chr1_C_albicans_SC5314:1180920-1177591C, translated using codon table 12 (1109 amino acids) Uncharacterized ORF;Putative karyopherin beta;repressed by nitric oxide
1.06618				753950000	0.279093	orf19.2775	>orf19.2775 IDI1 CGDID:CAL0004272 COORDS:Ca21chr4_C_albicans_SC5314:450184-451038W, translated using codon table 12 (284 amino acids) Uncharacterized ORF;Ortholog(s) have isopentenyl-diphosphate delta-isomerase activity, role in farnesyl diphosphate biosy
1.07898				184120000	0.279376	orf19.1753	>orf19.1753 PUS7 CGDID:CAL0000869 COORDS:Ca21chr2_C_albicans_SC5314:2114501-2116780W, translated using codon table 12 (759 amino acids) Uncharacterized ORF;Protein similar to S. cerevisiae tRNA modification protein;induced upon biofilm formation
1.07884				167140000	0.27973	orf19.7377	>orf19.7377 ASE1 CGDID:CAL0004769 COORDS:Ca21chr3_C_albicans_SC5314:1340550-1343270W, translated using codon table 12 (906 amino acids) Uncharacterized ORF;Putative microtubule-associated protein;member of conserved Mcm1p regulon;periodic mRNA expressio
1.07841				92752000	0.280807	orf19.5194.1	>orf19.5194.1 orf19.5194.1 CGDID:CAF0007032 COORDS:Ca21chr1_C_albicans_SC5314:917328-916502C, translated using codon table 12 (253 amino acids) Uncharacterized ORF;Putative protein of unknown function;clade-associated gene expression
1.07823				180400000	0.281244	orf19.4879.2	>orf19.4879.2 NTF2 CGDID:CAF0007025 COORDS:Ca21chr1_C_albicans_SC5314:2212873-2212390C, translated using codon table 12 (124 amino acids) Uncharacterized ORF;Putative nuclear envelope protein;regulated by Ssn6p
1.10129				58578000	0.282095	orf19.5039	>orf19.5039 orf19.5039 CGDID:CAL0001650 COORDS:Ca21chr4_C_albicans_SC5314:817412-816489C, translated using codon table 12 (307 amino acids) Uncharacterized ORF;Ortholog(s) have role in exonucleolytic trimming to generate mature 3-end of 5.8S rRNA from tr
1.10115				54943000	0.282333	orf19.4416	>orf19.4416 VPS13 CGDID:CAL0001755 COORDS:Ca21chr4_C_albicans_SC5314:1341961-1351212W, translated using codon table 12 (3083 amino acids) Uncharacterized ORF;Putative vacuolar protein sorting-associated protein;gene used for multilocus sequence typing
1.16418				26529000	0.282525	orf19.5839	>orf19.5839 PDR17 CGDID:CAL0002337 COORDS:Ca21chr2_C_albicans_SC5314:537582-538676W, translated using codon table 12 (364 amino acids) Verified ORF;Fungal-specific protein (no human or murine homolog);role in sensitivity to fluconazole, specifically
1.07765				161000000	0.282705	orf19.5095	>orf19.5095 orf19.5095 CGDID:CAL0001819 COORDS:Ca21chr1_C_albicans_SC5314:1789380-1785424C, translated using codon table 12 (1318 amino acids) Uncharacterized ORF;Putative oxysterol-binding protein;caspofungin induced;possibly an essential gene, disrupt
1.06487				315600000	0.283589	orf19.6948	>orf19.6948 CCC1 CGDID:CAL0000278 COORDS:Ca21chr3_C_albicans_SC5314:782738-783676W, translated using codon table 12 (312 amino acids) Verified ORF;Manganese transporter required for normal filamentous growth;mRNA binds She3p and is localized to hyphal ti
1.07725				124390000	0.283694	orf19.7593	>orf19.7593 orf19.7593 CGDID:CAL0000243 COORDS:Ca21chrR_C_albicans_SC5314:2176379-2174925C, translated using codon table 12 (484 amino acids) Uncharacterized ORF;Ortholog(s) have role in asparagine catabolic process and intracellular localization
1.16319				18512000	0.283821	orf19.154	>orf19.154 orf19.154 CGDID:CAL0003149 COORDS:Ca21chr2_C_albicans_SC5314:986084-984999C, translated using codon table 12 (361 amino acids) Uncharacterized ORF;Hap43p-induced gene;<I>S. cerevisiae</I> ortholog UTP30, a U3-containing 90S preribosome complex
1.07707				219760000	0.28416	orf19.1860.1	>orf19.1860.1 orf19.1860.1 CGDID:CAF0007418 COORDS:Ca21chr2_C_albicans_SC5314:1561733-1560333C, translated using codon table 12 (466 amino acids) Uncharacterized ORF;Has domain(s) with predicted aminopeptidase activity and role in proteolysis
1.03952				6607100000	0.28524	orf19.4004	>orf19.4004 CCT3 CGDID:CAL0004644 COORDS:Ca21chr5_C_albicans_SC5314:1127833-1129422W, translated using codon table 12 (529 amino acids) Verified ORF;Putative cytosolic chaperonin Cct ring complex subunit;mutation confers hypersensitivity to cytochalasin
1.16208				26477000	0.285283	orf19.223	>orf19.223 orf19.223 CGDID:CAL0003919 COORDS:Ca21chr2_C_albicans_SC5314:1797692-1800076W, translated using codon table 12 (794 amino acids) Uncharacterized ORF;Putative serine/threonine protein kinase;Hap43p-repressed gene;increased expression in respon
1.0765				175200000	0.285586	orf19.6452	>orf19.6452 RBP1 CGDID:CAL0002227 COORDS:Ca21chr7_C_albicans_SC5314:553012-552638C, translated using codon table 12 (124 amino acids) Verified ORF;Peptidyl-prolyl cis-trans isomerase;rapamycin-binding protein;homozygous null mutation confers rapamycin r
1.03942				1840000000	0.285703	orf19.6717	>orf19.6717 orf19.6717 CGDID:CAL0004757 COORDS:Ca21chr3_C_albicans_SC5314:1754953-1755732W, translated using codon table 12 (259 amino acids) Uncharacterized ORF;Ortholog(s) have cytoplasm, nucleus localization
1.09905				44594000	0.286085	orf19.6928	>orf19.6928 SAP9 CGDID:CAL0000212 COORDS:Ca21chr3_C_albicans_SC5314:810377-808743C, translated using codon table 12 (544 amino acids) Verified ORF;Secreted aspartyl protease;roles in adhesion, cell surface integrity;induced by antifungal drugs, stationa
1.06413				488320000	0.286111	orf19.5171	>orf19.5171 PMT1 CGDID:CAL0002654 COORDS:Ca21chr7_C_albicans_SC5314:627319-624686C, translated using codon table 12 (877 amino acids) Verified ORF;Protein mannosyltransferase (PMT), required for virulence in mouse systemic infection and for adhesion to ep
1.07628				166130000	0.28614	orf19.4191	>orf19.4191 RLP24 CGDID:CAL0005882 COORDS:Ca21chr4_C_albicans_SC5314:90017-89388C, translated using codon table 12 (209 amino acids) Verified ORF;Putative ribosomal protein;Hap43p-induced;essential gene;S. cerevisiae ortholog is essential;heterozygous
1.0392				4295800000	0.286743	orf19.5746	>orf19.5746 ALA1 CGDID:CAL0001447 COORDS:Ca21chr6_C_albicans_SC5314:804378-807287W, translated using codon table 12 (969 amino acids) Verified ORF;Alanyl-tRNA synthetase;translational regulation generates cytoplasmic and mitochondrial forms;Gcn4p-regula
1.09864				76069000	0.286808	orf19.2111	>orf19.2111 orf19.2111 CGDID:CAL0005275 COORDS:Ca21chr2_C_albicans_SC5314:30051-28906C, translated using codon table 12 (381 amino acids) Uncharacterized ORF;Ortholog(s) have core RNA polymerase II binding transcription factor activity and role in transcr
1.16066				30847000	0.287156	orf19.2419	>orf19.2419 orf19.2419 CGDID:CAL0001484 COORDS:Ca21chrR_C_albicans_SC5314:699798-700979W, translated using codon table 12 (393 amino acids) Uncharacterized ORF;Hap43p-repressed gene;ortholog of <i>S. cerevisiae</i> DOM34, an RNA-binding protein required
1.03887				15900000000	0.288268	orf19.6250	>orf19.6250 orf19.6250 CGDID:CAL0000511 COORDS:Ca21chr1_C_albicans_SC5314:1411731-1412774W, translated using codon table 12 (347 amino acids) Uncharacterized ORF;Ortholog(s) have eukaryotic initiation factor 4G binding, mRNA binding activity
1.15961				29771000	0.288538	orf19.6628	>orf19.6628 orf19.6628 CGDID:CAL0003995 COORDS:Ca21chrR_C_albicans_SC5314:1232369-1233088W, translated using codon table 12 (239 amino acids) Uncharacterized ORF;Ortholog of <i>C. parapsilosis CDC317</i> : CPAR2_206070, <i>Candida tenuis NRRL Y-1498</i> :
1.0388				34600000000	0.288607	orf19.4152	>orf19.4152 CEF3 CGDID:CAL0005746 COORDS:Ca21chr5_C_albicans_SC5314:351071-347919C, translated using codon table 12 (1050 amino acids) Verified ORF;Translation elongation factor 3;antigenic in humans;predicted C-term nucleotide-binding active site;prot
1.03846				1568700000	0.290194	orf19.2795	>orf19.2795 orf19.2795 CGDID:CAL0004304 COORDS:Ca21chr1_C_albicans_SC5314:1624898-1623924C, translated using codon table 12 (324 amino acids) Uncharacterized ORF;Ortholog(s) have tRNA binding activity, role in regulation of ascospore formation, regulation
1.06259				589590000	0.29143	orf19.7124	>orf19.7124 RVS161 CGDID:CAL0002888 COORDS:Ca21chr7_C_albicans_SC5314:2040-1246C, translated using codon table 12 (264 amino acids) Verified ORF;Protein required for endocytosis;contains a BAR domain, which is found in proteins involved in membrane curva
1.15722				10300000	0.291712	orf19.2471	>orf19.2471 GIM5 CGDID:CAL0001602 COORDS:Ca21chr1_C_albicans_SC5314:1211899-1212375W, translated using codon table 12 (158 amino acids) Uncharacterized ORF;Putative heterohexameric cochaperone prefoldin complex subunit;macrophage/pseudohyphal-repressed g
1.06246				578540000	0.291903	orf19.5432	>orf19.5432 TPT1 CGDID:CAL0005230 COORDS:Ca21chr3_C_albicans_SC5314:48915-49538W, translated using codon table 12 (207 amino acids) Verified ORF;tRNA 2-phosphotransferase;enzyme of tRNA splicing;functionally complements viability of S. cerevisiae tpt1
1.03808				2468200000	0.291986	orf19.4831	>orf19.4831 MTS1 CGDID:CAL0005352 COORDS:Ca21chr1_C_albicans_SC5314:2129818-2131359W, translated using codon table 12 (513 amino acids) Verified ORF;Sphingolipid C9-methyltransferase, catalyzes methylation of the 9th carbon in the long chain base componen
1.03806				2286400000	0.292042	orf19.2960	>orf19.2960 FRS2 CGDID:CAL0006075 COORDS:Ca21chr1_C_albicans_SC5314:565743-567233W, translated using codon table 12 (496 amino acids) Uncharacterized ORF;Putative tRNA-Phe synthetase;genes encoding ribosomal subunits, translation factors, tRNA synthetase
1.15667				22058000	0.292439	orf19.4367	>orf19.4367 SMC1 CGDID:CAL0001080 COORDS:Ca21chrR_C_albicans_SC5314:822147-818425C, translated using codon table 12 (1240 amino acids) Uncharacterized ORF;Protein similar to chromosomal ATPases;RNA abundance regulated by tyrosol and cell density;cell-cy
1.06228				365050000	0.292522	orf19.2233	>orf19.2233 PRE2 CGDID:CAL0006242 COORDS:Ca21chr2_C_albicans_SC5314:1397736-1396879C, translated using codon table 12 (285 amino acids) Uncharacterized ORF;Putative proteasome beta-5 subunit;macrophage-induced protein
1.15638				6271800	0.292819	orf19.2216	>orf19.2216 PDS5 CGDID:CAL0006191 COORDS:Ca21chr2_C_albicans_SC5314:1562086-1565997W, translated using codon table 12 (1303 amino acids) Uncharacterized ORF;Putative protein with a predicted role in establishment and maintenance of sister chromatid conden
1.09514				38685000	0.293097	orf19.132	>orf19.132 orf19.132 CGDID:CAL0003071 COORDS:Ca21chr6_C_albicans_SC5314:240202-238421C, translated using codon table 12 (593 amino acids) Verified ORF;Ortholog(s) have role in histone deacetylation, negative regulation of chromatin silencing at telomere,
1.06204				536150000	0.293358	orf19.7019	>orf19.7019 YML6 CGDID:CAL0001940 COORDS:Ca21chr7_C_albicans_SC5314:200872-201708W, translated using codon table 12 (278 amino acids) Uncharacterized ORF;Putative mitochondrial ribosomal protein;induced upon adherence to polystyrene
1.03763				876530000	0.294103	orf19.3013	>orf19.3013 CDC12 CGDID:CAL0001344 COORDS:Ca21chr1_C_albicans_SC5314:673909-672554C, translated using codon table 12 (397 amino acids) Verified ORF;Septin;essential for viability;gene has predicted splice sites;forms ring at sites of cell division and
1.07306				125000000	0.294304	orf19.3396	>orf19.3396 HCH1 CGDID:CAL0004225 COORDS:Ca21chr6_C_albicans_SC5314:386653-386112C, translated using codon table 12 (152 amino acids) Uncharacterized ORF;Protein not essential for viability;regulated by Gcn4p;induced in response to amino acid starvation
1.09441				43172000	0.294432	orf19.429	>orf19.429 orf19.429 CGDID:CAL0005626 COORDS:Ca21chr1_C_albicans_SC5314:1125735-1123924C, translated using codon table 12 (603 amino acids) Uncharacterized ORF;Putative non-canonical poly(A) polymerase;repressed by nitric oxide
1.06172				354140000	0.29447	orf19.86	>orf19.86 orf19.86 CGDID:CAL0000683 COORDS:Ca21chr6_C_albicans_SC5314:167189-167674W, translated using codon table 12 (161 amino acids) Uncharacterized ORF;Putative glutathione peroxidase;peroxide-induced;induced in response to peroxide, exposure to neu
1.06157				659840000	0.295002	orf19.4640	>orf19.4640 PWP1 CGDID:CAL0003692 COORDS:Ca21chr4_C_albicans_SC5314:305343-307184W, translated using codon table 12 (613 amino acids) Uncharacterized ORF;Putative rRNA processing protein;Hap43p-induced gene;downregulated in core stress response
1.07249				148400000	0.295772	orf19.3357	>orf19.3357 orf19.3357 CGDID:CAL0004161 COORDS:Ca21chr1_C_albicans_SC5314:342459-341947C, translated using codon table 12 (170 amino acids) Uncharacterized ORF;Ortholog(s) have mitochondrion localization
1.09326				66274000	0.296504	orf19.7479	>orf19.7479 NTH1 CGDID:CAL0005674 COORDS:Ca21chrR_C_albicans_SC5314:130650-133373W, translated using codon table 12 (907 amino acids) Verified ORF;Neutral trehalase;hyphal induction in null mutant delayed but not reduced overall;not required for virulen
1.06107				310900000	0.296744	orf19.6846	>orf19.6846 PHO85 CGDID:CAL0005766 COORDS:Ca21chr1_C_albicans_SC5314:933901-932824C, translated using codon table 12 (332 amino acids) Verified ORF;Functional homolog of S. cerevisiae Pho85p, a cyclin-dependent kinase that regulates transcription of PHO g
1.15343				12613000	0.296767	orf19.7061	>orf19.7061 orf19.7061 CGDID:CAL0002107 COORDS:Ca21chr7_C_albicans_SC5314:96723-96043C, translated using codon table 12 (226 amino acids) Uncharacterized ORF;Ortholog(s) have ATPase activity and cytosol, nucleus localization
1.09299				81340000	0.29701	orf19.3230	>orf19.3230 BOI2 CGDID:CAL0003275 COORDS:Ca21chrR_C_albicans_SC5314:295246-291728C, translated using codon table 12 (1172 amino acids) Verified ORF;Putative SH3-domain-containing protein;mutation confers hypersensitivity to toxic ergosterol analog
1.03696				37200000000	0.297257	orf19.1065	>orf19.1065 SSA2 CGDID:CAL0001208 COORDS:Ca21chr1_C_albicans_SC5314:892386-890449C, translated using codon table 12 (645 amino acids) Verified ORF;HSP70 family chaperone;found in cell wall fractions;antigenic;role in import of beta-defensin peptides;A
1.03686				1492300000	0.297747	orf19.3955	>orf19.3955 MES1 CGDID:CAL0003012 COORDS:Ca21chr5_C_albicans_SC5314:1022448-1020202C, translated using codon table 12 (748 amino acids) Uncharacterized ORF;Cytoplasmic methionyl-tRNA synthetase;zinc-binding motif;ribosomal subunits, translation factors,
1.06077				713220000	0.297777	orf19.526	>orf19.526 NHP2 CGDID:CAL0000123 COORDS:Ca21chrR_C_albicans_SC5314:969176-968697C, translated using codon table 12 (159 amino acids) Uncharacterized ORF;Putative H/ACA snoRNP protein;macrophage/pseudohyphal-induced
1.15177				13114000	0.298995	orf19.5938	>orf19.5938 SEN1 CGDID:CAL0003335 COORDS:Ca21chr3_C_albicans_SC5314:1014995-1008939C, translated using codon table 12 (2018 amino acids) Uncharacterized ORF;Putative helicase;decreased expression in response to prostaglandins
1.03645				2948300000	0.299682	orf19.4704	>orf19.4704 ARO1 CGDID:CAL0004346 COORDS:Ca21chr4_C_albicans_SC5314:159251-163906W, translated using codon table 12 (1551 amino acids) Uncharacterized ORF;Putative pentafunctional arom enzyme;fungal-specific (no human or murine homolog);Gcn2p-, Gcn4p-re
1.07094				94379000	0.299757	orf19.3585	>orf19.3585 orf19.3585 CGDID:CAL0006000 COORDS:Ca21chr2_C_albicans_SC5314:1794949-1795341W, translated using codon table 12 (130 amino acids) Uncharacterized ORF;Putative tRNA methyltransferase complex subunit;regulated by Gcn4p;repressed in response to
1.03637				14700000000	0.300063	orf19.3138	>orf19.3138 NOP1 CGDID:CAL0002295 COORDS:Ca21chr4_C_albicans_SC5314:1497965-1498915W, translated using codon table 12 (316 amino acids) Verified ORF;Nucleolar protein;flucytosine induced;Hap43p-induced gene
1.07075				200300000	0.30023	orf19.962	>orf19.962 orf19.962 CGDID:CAL0003742 COORDS:Ca21chr5_C_albicans_SC5314:53780-53247C, translated using codon table 12 (177 amino acids) Uncharacterized ORF;Hap43p-induced gene
1.07037				107630000	0.301222	orf19.6314	>orf19.6314 RPB8 CGDID:CAL0001261 COORDS:Ca21chrR_C_albicans_SC5314:1036065-1036511W, translated using codon table 12 (148 amino acids) Verified ORF;Putative subunit of RNA polymerases I, II, and III;regulated by Gcn4p;repressed in response to amino aci
1.05968				391740000	0.301618	orf19.1375	>orf19.1375 LEU42 CGDID:CAL0003911 COORDS:Ca21chr2_C_albicans_SC5314:1992242-1993957W, translated using codon table 12 (571 amino acids) Uncharacterized ORF;Putative alpha-isopropylmalate synthase;fungal-specific (no human/murine homolog);upregulated in
1.14935				30776000	0.302261	orf19.5675	>orf19.5675 orf19.5675 CGDID:CAL0000717 COORDS:Ca21chr4_C_albicans_SC5314:77579-74271C, translated using codon table 12 (1102 amino acids) Uncharacterized ORF;Ortholog(s) have SUMO binding activity, role in chromatin assembly or disassembly, mating type s
1.05946				424860000	0.302391	orf19.4865	>orf19.4865 orf19.4865 CGDID:CAL0005434 COORDS:Ca21chr1_C_albicans_SC5314:2181078-2182934W, translated using codon table 12 (618 amino acids) Uncharacterized ORF;Ortholog(s) have phosphatidylinositol-3,5-bisphosphate 5-phosphatase activity, phosphatidylin
1.03582				5572300000	0.30268	orf19.3541	>orf19.3541 ERF1 CGDID:CAL0005902 COORDS:Ca21chr2_C_albicans_SC5314:1056790-1055480C, translated using codon table 12 (436 amino acids) Uncharacterized ORF;Putative translation release factor 1, which interacts with stop codons and promotes release of nas
1.08957				85619000	0.30325	orf19.6667	>orf19.6667 orf19.6667 CGDID:CAL0004093 COORDS:Ca21chr5_C_albicans_SC5314:797458-797964W, translated using codon table 12 (168 amino acids) Uncharacterized ORF;Ortholog(s) have histone deacetylase activity
1.08955				59476000	0.30328	orf19.4009	>orf19.4009 CNB1 CGDID:CAL0004650 COORDS:Ca21chr5_C_albicans_SC5314:1133376-1132855C, translated using codon table 12 (173 amino acids) Verified ORF;Regulatory subunit of calcineurin B (Ca[2+]-calmodulin-regulated S/T protein phosphatase);required for wi
1.06946				156860000	0.303581	orf19.906	>orf19.906 ROM2 CGDID:CAL0003577 COORDS:Ca21chr2_C_albicans_SC5314:669665-665520C, translated using codon table 12 (1381 amino acids) Uncharacterized ORF;Putative GDP/GTP exchange factor;possibly an essential gene, disruptants not obtained by UAU1 method
1.1474				14272000	0.304902	orf19.3624	>orf19.3624 orf19.3624 CGDID:CAL0000344 COORDS:Ca21chr2_C_albicans_SC5314:1731843-1728403C, translated using codon table 12 (1146 amino acids) Uncharacterized ORF;Ortholog(s) have exoribonuclease II activity, role in mitochondrial RNA catabolic process an
1.06894				133850000	0.304912	orf19.3478	>orf19.3478 NIP7 CGDID:CAL0005065 COORDS:Ca21chr6_C_albicans_SC5314:493633-494178W, translated using codon table 12 (181 amino acids) Uncharacterized ORF;Putative nucleolar protein with role in ribosomal assembly;hyphal-induced;Hap43p-induced
1.05875				449550000	0.304922	orf19.7216	>orf19.7216 orf19.7216 CGDID:CAL0003771 COORDS:Ca21chr1_C_albicans_SC5314:3105892-3106557W, translated using codon table 12 (221 amino acids) Uncharacterized ORF;Ortholog(s) have GTP binding, GTPase activity, role in G1 to G0 transition, endocytosis, prot
1.06871				233230000	0.305522	orf19.1355	>orf19.1355 orf19.1355 CGDID:CAL0003859 COORDS:Ca21chr2_C_albicans_SC5314:2039304-2038261C, translated using codon table 12 (347 amino acids) Uncharacterized ORF;Putative protein of unknown function;stationary phase enriched protein
1.06856				172780000	0.305891	orf19.5078	>orf19.5078 orf19.5078 CGDID:CAL0001761 COORDS:Ca21chr1_C_albicans_SC5314:1756580-1756987W, translated using codon table 12 (135 amino acids) Uncharacterized ORF;Hap43p-repressed gene
1.14635				10406000	0.306327	orf19.956	>orf19.956 orf19.956 CGDID:CAL0003716 COORDS:Ca21chr5_C_albicans_SC5314:63318-54415C, translated using codon table 12 (2967 amino acids) Uncharacterized ORF;Ortholog(s) have role in fermentation and mitochondrion localization
1.03497				14100000000	0.306761	orf19.3324	>orf19.3324 TIF CGDID:CAL0004095 COORDS:Ca21chr1_C_albicans_SC5314:264681-263488C, translated using codon table 12 (397 amino acids) Uncharacterized ORF;Translation initiation factor;upregulated in highly virulent strain compared to less virulent strain;
1.08698				45334000	0.308021	orf19.805	>orf19.805 orf19.805 CGDID:CAL0002610 COORDS:Ca21chr2_C_albicans_SC5314:875646-876503W, translated using codon table 12 (285 amino acids) Uncharacterized ORF;Putative protein of unknown function;Hap43p-repressed gene;<I>S. cerevisiae</I> ortholog YGR021
1.05776				701950000	0.308436	orf19.5691	>orf19.5691 CDC11 CGDID:CAL0000744 COORDS:Ca21chr5_C_albicans_SC5314:8946-10154W, translated using codon table 12 (402 amino acids) Verified ORF;Septin;required for wild-type cell and hyphal morphology, agar-invasive growth, full virulence and kidney tis
1.0577				293980000	0.308631	orf19.3139	>orf19.3139 orf19.3139 CGDID:CAL0002296 COORDS:Ca21chr4_C_albicans_SC5314:1495860-1496978W, translated using codon table 12 (372 amino acids) Uncharacterized ORF;Hap43p-repressed gene;increased transcription is observed upon benomyl treatment;oxidative
1.06743				118950000	0.308853	orf19.947	>orf19.947 MRP17 CGDID:CAL0003691 COORDS:Ca21chr5_C_albicans_SC5314:78136-77777C, translated using codon table 12 (119 amino acids) Uncharacterized ORF;Predicted mitochondrial ribosomal protein
1.08524				49883000	0.311248	orf19.1280	>orf19.1280 SUI1 CGDID:CAL0003056 COORDS:Ca21chr5_C_albicans_SC5314:912410-912081C, translated using codon table 12 (109 amino acids) Uncharacterized ORF;Putative translation initiation factor;flucytosine induced;genes encoding ribosomal subunits, trans
1.05682				656690000	0.311769	orf19.5073	>orf19.5073 DPM1 CGDID:CAL0001756 COORDS:Ca21chr1_C_albicans_SC5314:1750300-1751019W, translated using codon table 12 (239 amino acids) Verified ORF;Putative dolichol phosphate mannose synthase;filament induced;Tup1p-regulated
1.14231				16098000	0.311839	orf19.7059	>orf19.7059 orf19.7059 CGDID:CAL0002086 COORDS:Ca21chr7_C_albicans_SC5314:99298-97943C, translated using codon table 12 (451 amino acids) Uncharacterized ORF;Ortholog(s) have endoribonuclease activity, role in nuclear mRNA surveillance of mRNP export, tra
1.14192				26212000	0.312377	orf19.6627	>orf19.6627 orf19.6627 CGDID:CAL0003992 COORDS:Ca21chrR_C_albicans_SC5314:1233786-1234466W, translated using codon table 12 (226 amino acids) Uncharacterized ORF;Predicted ORF in Assemblies 19, 20 and 21;possibly transcriptionally regulated upon hyphal f
1.08456				41843000	0.312509	orf19.6031	>orf19.6031 VPS27 CGDID:CAL0005098 COORDS:Ca21chr1_C_albicans_SC5314:133937-131412C, translated using codon table 12 (841 amino acids) Verified ORF;Putative ESCRT-0 complex protein with a role in multivesicular body (MVB) trafficking
1.03373				1725300000	0.312782	orf19.6539	>orf19.6539 orf19.6539 CGDID:CAL0003165 COORDS:Ca21chr7_C_albicans_SC5314:390349-391845W, translated using codon table 12 (498 amino acids) Uncharacterized ORF;Putative trancription modulator;RuvB-like protein family member;heterozygous null mutant disp
1.05652				306290000	0.312849	orf19.4437	>orf19.4437 orf19.4437 CGDID:CAL0001816 COORDS:Ca21chr1_C_albicans_SC5314:1581235-1584358W, translated using codon table 12 (1017 amino acids) Uncharacterized ORF;Ortholog(s) have ATPase activity, DNA binding, nucleosome binding, rDNA binding activity
1.08435				46803000	0.312906	orf19.6512	>orf19.6512 EXO70 CGDID:CAL0003072 COORDS:Ca21chr7_C_albicans_SC5314:457369-455366C, translated using codon table 12 (667 amino acids) Verified ORF;Predicted subunit of the exocyst complex, involved in exocytosis;localizes to a crescent on the surface of
1.08425				38681000	0.313079	orf19.145	>orf19.145 RPB4 CGDID:CAL0003117 COORDS:Ca21chr2_C_albicans_SC5314:976175-975366C, translated using codon table 12 (269 amino acids) Verified ORF;Protein similar to S. cerevisiae Rpb4p, which is a component of RNA polymerase II;transposon mutation affect
1.06572				166070000	0.313316	orf19.2768	>orf19.2768 AMS1 CGDID:CAL0004258 COORDS:Ca21chr4_C_albicans_SC5314:464968-468435W, translated using codon table 12 (1155 amino acids) Uncharacterized ORF;Putative alpha-mannosidase;transcription is regulated by Nrg1p;induced during cell wall regenerati
1.08404				81953000	0.313467	orf19.6306	>orf19.6306 orf19.6306 CGDID:CAL0001236 COORDS:Ca21chrR_C_albicans_SC5314:1055989-1054484C, translated using codon table 12 (501 amino acids) Verified ORF;Trimethylaminobutyraldehyde dehydrogenase, the third enzyme of the carnitine biosynthesis pathway
1.14062				26249000	0.314153	orf19.6071	>orf19.6071 orf19.6071 CGDID:CAL0005184 COORDS:Ca21chr1_C_albicans_SC5314:57075-54838C, translated using codon table 12 (745 amino acids) Uncharacterized ORF;Ortholog(s) have peptide alpha-N-acetyltransferase activity, role in N-terminal peptidyl-methioni
1.08353				42564000	0.314433	orf19.297 orf19.279	>orf19.297 DTD2 CGDID:CAL0004118 COORDS:Ca21chr3_C_albicans_SC5314:639473-638901C, translated using codon table 12 (163 amino acids) Uncharacterized ORF;Ortholog(s) have D-tyrosyl-tRNA(Tyr) deacylase activity, role in D-leucine catabolic process, D-tyrosi
1.06524				241770000	0.314588	orf19.2151	>orf19.2151 NAG6 CGDID:CAL0005364 COORDS:Ca21chr6_C_albicans_SC5314:1016993-1019365W, translated using codon table 12 (790 amino acids) Verified ORF;Protein required for wild-type mouse virulence and wild-type cycloheximide resistance;putative GTP-bindin
1.08318				87370000	0.31508	orf19.5666	>orf19.5666 orf19.5666 CGDID:CAL0000694 COORDS:Ca21chr4_C_albicans_SC5314:59717-60157W, translated using codon table 12 (146 amino acids) Uncharacterized ORF;Ortholog(s) have transcription coactivator activity
1.06502				220140000	0.315153	orf19.5847	>orf19.5847 orf19.5847 CGDID:CAL0002357 COORDS:Ca21chrR_C_albicans_SC5314:1185262-1181789C, translated using codon table 12 (1157 amino acids) Uncharacterized ORF;Ortholog(s) have DNA-directed RNA polymerase activity, role in tRNA transcription from RNA p
1.05573				335320000	0.315694	orf19.6729	>orf19.6729 TIP120 CGDID:CAL0004808 COORDS:Ca21chr3_C_albicans_SC5314:1735567-1739154W, translated using codon table 12 (1195 amino acids) Verified ORF;Protein similar to human CAND1 (Cullin-Associated Nedd8-Dissociated) protein involved in regulation of
1.08241				57961000	0.316515	orf19.2760	>orf19.2760 orf19.2760 CGDID:CAL0004251 COORDS:Ca21chr4_C_albicans_SC5314:489039-493301W, translated using codon table 12 (1420 amino acids) Verified ORF;Putative mRNA cleavage and polyadenylation factor;heterozygous null mutant exhibits hypersensitivity
1.08168				57906000	0.317885	orf19.5884	>orf19.5884 orf19.5884 CGDID:CAL0002457 COORDS:Ca21chr3_C_albicans_SC5314:910942-907580C, translated using codon table 12 (1120 amino acids) Uncharacterized ORF;Putative nucleolar preribosomal-associated protein;decreased transcription is observed upon b
1.08143				39941000	0.318356	orf19.1273	>orf19.1273 orf19.1273 CGDID:CAL0003018 COORDS:Ca21chr4_C_albicans_SC5314:1295913-1296305W, translated using codon table 12 (130 amino acids) Uncharacterized ORF;Ortholog(s) have tubulin binding activity, role in tubulin complex assembly and prefoldin com
1.0638				243000000	0.318383	orf19.4123	>orf19.4123 orf19.4123 CGDID:CAL0005631 COORDS:Ca21chr2_C_albicans_SC5314:1022071-1017245C, translated using codon table 12 (1608 amino acids) Uncharacterized ORF;Putative THO complex subunit;possibly an essential gene, disruptants not obtained by UAU1 m
1.03248				1108400000	0.31885	orf19.1164	>orf19.1164 GAR1 CGDID:CAL0002072 COORDS:Ca21chr1_C_albicans_SC5314:2538599-2539159W, translated using codon table 12 (186 amino acids) Verified ORF;Putative H/ACA snoRNP pseudouridylase complex protein;mutation confers hypersensitivity to tubercidin (7-
1.08101				86956000	0.319135	orf19.5356	>orf19.5356 orf19.5356 CGDID:CAL0004331 COORDS:Ca21chr2_C_albicans_SC5314:2208734-2205984C, translated using codon table 12 (916 amino acids) Uncharacterized ORF;Predicted ORF in Assemblies 19, 20 and 21;downregulated during core stress response
1.08095				67236000	0.319247	orf19.6259	>orf19.6259 orf19.6259 CGDID:CAL0000517 COORDS:Ca21chr1_C_albicans_SC5314:1396220-1395099C, translated using codon table 12 (373 amino acids) Uncharacterized ORF;Ortholog(s) have role in exonucleolytic trimming to generate mature 3-end of 5.8S rRNA from
1.0546				586940000	0.319778	orf19.5243	>orf19.5243 TRP3 CGDID:CAL0003556 COORDS:Ca21chr1_C_albicans_SC5314:2664966-2666528W, translated using codon table 12 (520 amino acids) Uncharacterized ORF;Putative bifunctional enzyme with predicted indole-3-glycerol-phosphate synthase and anthranilate s
1.05457				607020000	0.319892	orf19.2029 orf19.6078.1	>orf19.2029 RFC5 CGDID:CAL0004366 COORDS:Ca21chr2_C_albicans_SC5314:157441-156353C, translated using codon table 12 (362 amino acids) Uncharacterized ORF;Putative heteropentameric replication factor C subunit;periodic mRNA expression, peak at cell-cycle
1.13613				21471000	0.32036	orf19.1185	>orf19.1185 orf19.1185 CGDID:CAL0002130 COORDS:Ca21chr6_C_albicans_SC5314:28821-29930W, translated using codon table 12 (369 amino acids) Uncharacterized ORF;Ortholog(s) have ubiquitin-protein ligase activity and role in establishment of mitotic spindle o
1.03217				1429900000	0.320374	orf19.1986	>orf19.1986 ARO2 CGDID:CAL0002708 COORDS:Ca21chrR_C_albicans_SC5314:1672586-1673827W, translated using codon table 12 (413 amino acids) Verified ORF;Putative chorismate synthase;fungal-specific (no human or murine homolog);protein level decreased in sta
1.05432				734050000	0.320768	orf19.7652	>orf19.7652 CKA1 CGDID:CAL0000912 COORDS:Ca21chrR_C_albicans_SC5314:2257300-2258307W, translated using codon table 12 (335 amino acids) Uncharacterized ORF;Putative alpha subunit (catalytic subunit) of protein kinase CK2;Cka1p and Cka2p have a common tar
1.05415				262870000	0.321416	orf19.2688	>orf19.2688 NAN1 CGDID:CAL0003534 COORDS:Ca21chr4_C_albicans_SC5314:633200-630681C, translated using codon table 12 (839 amino acids) Verified ORF;Putative U3 snoRNP protein;Hap43p-induced gene;physically interacts with TAP-tagged Nop1p
1.13506				21825000	0.321836	orf19.6887	>orf19.6887 orf19.6887 CGDID:CAL0005907 COORDS:Ca21chr2_C_albicans_SC5314:1176415-1176083C, translated using codon table 12 (110 amino acids) Uncharacterized ORF;Predicted ORF from Assembly 19;repressed by nitric oxide;removed from Assembly 20;subseque
1.054				766010000	0.321938	orf19.709	>orf19.709 PUP2 CGDID:CAL0001709 COORDS:Ca21chrR_C_albicans_SC5314:1451118-1450351C, translated using codon table 12 (255 amino acids) Verified ORF;Alpha5 subunit of the 20S proteasome;macrophage/pseudohyphal-repressed;regulated by Gcn2p and Gcn4p;prot
1.0624				146070000	0.322104	orf19.2983	>orf19.2983 CDC73 CGDID:CAL0006129 COORDS:Ca21chr1_C_albicans_SC5314:611996-613108W, translated using codon table 12 (370 amino acids) Verified ORF;Protein similar to S. cerevisiae Cdc73p, which is a transcription elongation factor;cdc73 kap114 double tr
1.13471				27903000	0.322329	orf19.4726	>orf19.4726 orf19.4726 CGDID:CAL0004401 COORDS:Ca21chr1_C_albicans_SC5314:1895937-1895362C, translated using codon table 12 (191 amino acids) Uncharacterized ORF;Ortholog(s) have calcium ion binding, enzyme activator activity, role in regulation of conjug
1.05389				783540000	0.32234	orf19.5850	>orf19.5850 NOC2 CGDID:CAL0002373 COORDS:Ca21chrR_C_albicans_SC5314:1174845-1176989W, translated using codon table 12 (714 amino acids) Verified ORF;Putative nucleolar complex protein;Hap43p-induced gene;transposon mutation affects filamentous growth;m
1.06231				140420000	0.322347	orf19.7290	>orf19.7290 orf19.7290 CGDID:CAL0004008 COORDS:Ca21chrR_C_albicans_SC5314:1913738-1913235C, translated using codon table 12 (167 amino acids) Uncharacterized ORF;Ortholog(s) have RNA cap binding activity, role in deadenylation-dependent decapping of nucle
1.03173				1067900000	0.322549	orf19.1578	>orf19.1578 orf19.1578 CGDID:CAL0005606 COORDS:Ca21chr2_C_albicans_SC5314:509452-514620W, translated using codon table 12 (1722 amino acids) Uncharacterized ORF;Hap43p-induced gene
1.06203				114900000	0.323087	orf19.7323	>orf19.7323 CBP1 CGDID:CAL0004575 COORDS:Ca21chrR_C_albicans_SC5314:1970339-1968870C, translated using codon table 12 (489 amino acids) Verified ORF;Corticosteroid binding protein;transcription induced at late log-phase or upon adherence to polystyrene;
1.06183				124320000	0.323601	orf19.73	>orf19.73 orf19.73 CGDID:CAL0000656 COORDS:Ca21chr6_C_albicans_SC5314:920465-923449W, translated using codon table 12 (994 amino acids) Uncharacterized ORF;Ortholog(s) have role in ribosome biogenesis and cytoplasm, ribosome localization
1.0618				93896000	0.323689	orf19.6029	>orf19.6029 ROT1 CGDID:CAL0005077 COORDS:Ca21chr1_C_albicans_SC5314:136438-135656C, translated using codon table 12 (260 amino acids) Uncharacterized ORF;Similar to S. cerevisiae Rot1p, which is involved in cell wall 1,6-beta-glucan biosynthesis;has pred
1.07821				36042000	0.324414	orf19.3233	>orf19.3233 HSE1 CGDID:CAL0003285 COORDS:Ca21chrR_C_albicans_SC5314:280419-278923C, translated using codon table 12 (498 amino acids) Uncharacterized ORF;ESCRT-0 complex subunit;SH3-domain-containing protein
1.05301				599630000	0.325527	orf19.482	>orf19.482 RPT4 CGDID:CAL0005827 COORDS:Ca21chrR_C_albicans_SC5314:903069-904355W, translated using codon table 12 (428 amino acids) Uncharacterized ORF;26S proteasome regulatory subunit;regulated by Gcn2p and Gcn4p;protein level decreases in stationary
1.07726				34041000	0.326202	orf19.2306	>orf19.2306 orf19.2306 CGDID:CAL0000649 COORDS:Ca21chr1_C_albicans_SC5314:2445609-2446145W, translated using codon table 12 (178 amino acids) Uncharacterized ORF;Ortholog(s) have oxidoreductase activity, acting on single donors with incorporation of molec
1.06074				128520000	0.326509	orf19.6904	>orf19.6904 GCN3 CGDID:CAL0000120 COORDS:Ca21chr7_C_albicans_SC5314:254406-255341W, translated using codon table 12 (311 amino acids) Uncharacterized ORF;Putative translation initiator;downregulated in the presence of human whole blood or polymorphonucle
1.07674				56531000	0.327196	orf19.5009	>orf19.5009 orf19.5009 CGDID:CAL0001573 COORDS:Ca21chr1_C_albicans_SC5314:3014085-3016001W, translated using codon table 12 (638 amino acids) Uncharacterized ORF;Ortholog(s) have cytoplasm localization
1.06016				150390000	0.32808	orf19.6692	>orf19.6692 MNN7 CGDID:CAL0004148 COORDS:Ca21chr7_C_albicans_SC5314:800431-802701W, translated using codon table 12 (756 amino acids) Verified ORF;Putative mannosyltransferase;identified in detergent-resistant membrane fraction (possible lipid raft compo
1.07626				85290000	0.328111	orf19.7177	>orf19.7177 KAP120 CGDID:CAL0003089 COORDS:Ca21chr7_C_albicans_SC5314:878376-875434C, translated using codon table 12 (980 amino acids) Verified ORF;Putative karyopherin;mutation confers hypersensitivity to cytochalasin D
1.03036				803010000	0.329308	orf19.2598	>orf19.2598 VMA4 CGDID:CAL0002571 COORDS:Ca21chrR_C_albicans_SC5314:431051-430303C, translated using codon table 12 (226 amino acids) Uncharacterized ORF;H+ transporting ATPase E chain;transcription is regulated by Mig1p;caspofungin repressed;protein l
1.03035				3800000000	0.329348	orf19.2183	>orf19.2183 KRE30 CGDID:CAL0005445 COORDS:Ca21chr2_C_albicans_SC5314:1623732-1621903C, translated using codon table 12 (609 amino acids) Verified ORF;YEF3-subfamily ABC family protein, predicted not to be a transporter;downregulated during core stress re
1.07515				49310000	0.33022	orf19.4263	>orf19.4263 orf19.4263 CGDID:CAL0000285 COORDS:Ca21chr5_C_albicans_SC5314:560499-559336C, translated using codon table 12 (387 amino acids) Uncharacterized ORF;Ortholog of <i>Candida albicans WO-1</i> : CAWG_04633
1.07457				69592000	0.33132	orf19.479.2	>orf19.479.2 orf19.479.2 CGDID:CAF0006899 COORDS:Ca21chrR_C_albicans_SC5314:899782-899055C, translated using codon table 12 (216 amino acids) Uncharacterized ORF;Ortholog(s) have SNAP receptor activity and role in ER to Golgi vesicle-mediated transport, r
1.12797				11540000	0.331745	orf19.4950	>orf19.4950 AKR1 CGDID:CAL0006326 COORDS:Ca21chr1_C_albicans_SC5314:2886263-2883822C, translated using codon table 12 (813 amino acids) Uncharacterized ORF;Ankyrin-repeat protein;increased transcription is observed upon fluphenazine treatment
1.0511				263900000	0.332533	orf19.6284	>orf19.6284 orf19.6284 CGDID:CAL0000593 COORDS:Ca21chrR_C_albicans_SC5314:1663894-1662977C, translated using codon table 12 (305 amino acids) Verified ORF;Ortholog(s) have GTP binding, signal recognition particle binding activity, role in protein targetin
1.07379				45153000	0.332813	orf19.1462	>orf19.1462 SMP2 CGDID:CAL0004653 COORDS:Ca21chr2_C_albicans_SC5314:277127-279472W, translated using codon table 12 (781 amino acids) Uncharacterized ORF;Putative Mg2+-dependent phosphatidate phosphatase;transcription is regulated by Nrg1p
1.051				266020000	0.33288	orf19.1041	>orf19.1041 orf19.1041 CGDID:CAL0001150 COORDS:Ca21chr1_C_albicans_SC5314:859468-857981C, translated using codon table 12 (495 amino acids) Uncharacterized ORF;Ortholog(s) have cyclin-dependent protein kinase activity
1.0296				12700000000	0.333048	orf19.717	>orf19.717 HSP60 CGDID:CAL0001744 COORDS:Ca21chrR_C_albicans_SC5314:1388174-1386474C, translated using codon table 12 (566 amino acids) Verified ORF;Heat shock protein;soluble in hyphae;regulated by Nrg1p and by iron;expression greater in high iron;he
1.05822				107710000	0.333289	orf19.2511.1	>orf19.2511.1 MRPL33 CGDID:CAF0006955 COORDS:Ca21chr3_C_albicans_SC5314:220280-220570W, translated using codon table 12 (96 amino acids) Uncharacterized ORF;Putative mitochondrial ribosomal protein of the large subunit;expression upregulated in an ssr1 n
1.05088				329230000	0.33333	orf19.6324	>orf19.6324 VID27 CGDID:CAL0001289 COORDS:Ca21chr6_C_albicans_SC5314:16035-13798C, translated using codon table 12 (745 amino acids) Verified ORF;Protein similar to S. cerevisiae Vid27p;transposon mutation affects filamentous growth;mutation confers hyp
1.02945				5273800000	0.333812	orf19.6701	>orf19.6701 orf19.6701 CGDID:CAL0004698 COORDS:Ca21chr7_C_albicans_SC5314:815015-812940C, translated using codon table 12 (691 amino acids) Verified ORF;Protein with similarity to amino acid-tRNA ligase;stationary phase enriched protein;GlcNAc-induced p
1.05801				127290000	0.333845	orf19.317	>orf19.317 orf19.317 CGDID:CAL0004668 COORDS:Ca21chr3_C_albicans_SC5314:676623-675700C, translated using codon table 12 (307 amino acids) Uncharacterized ORF;Ortholog(s) have inosine nucleosidase activity, nicotinamide riboside hydrolase activity, purine-
1.02939				1749900000	0.334123	orf19.763	>orf19.763 orf19.763 CGDID:CAL0001895 COORDS:Ca21chr1_C_albicans_SC5314:997365-998039W, translated using codon table 12 (224 amino acids) Uncharacterized ORF;Ortholog(s) have RNA cap binding activity, role in nuclear mRNA splicing, via spliceosome and com
1.05054				356490000	0.334577	orf19.5232	>orf19.5232 CSI2 CGDID:CAL0003537 COORDS:Ca21chr1_C_albicans_SC5314:2686695-2685817C, translated using codon table 12 (292 amino acids) Verified ORF;Putative 66S pre-ribosomal particle component;Hap43p-induced gene;essential for growth;transposon mutat
1.02927				13500000000	0.334729	orf19.3572.3	>orf19.3572.3 orf19.3572.3 CGDID:CAF0006990 COORDS:Ca21chr2_C_albicans_SC5314:1110528-1111348W, translated using codon table 12 (112 amino acids) Uncharacterized ORF;Ortholog(s) have structural constituent of ribosome activity, role in cytoplasmic transla
1.07272				52325000	0.334849	orf19.2873	>orf19.2873 TOP2 CGDID:CAL0005199 COORDS:Ca21chr4_C_albicans_SC5314:1473748-1478133W, translated using codon table 12 (1461 amino acids) Verified ORF;DNA topoisomerase II;catalyzes ATP-dependent DNA relaxation and decatenation in vitro;Y842 predicted to
1.12563				31724000	0.335037	orf19.7243	>orf19.7243 orf19.7243 CGDID:CAL0003875 COORDS:Ca21chr1_C_albicans_SC5314:3155237-3156250W, translated using codon table 12 (337 amino acids) Uncharacterized ORF;Ortholog(s) have dCMP deaminase activity, role in dTMP biosynthetic process, dUMP biosyntheti
1.05033				346950000	0.335383	orf19.5823	>orf19.5823 SGT2 CGDID:CAL0002299 COORDS:Ca21chr2_C_albicans_SC5314:564635-563601C, translated using codon table 12 (344 amino acids) Uncharacterized ORF;Putative small tetratricopeptide repeat (TPR)-containing protein;protein abundance is affected by UR
1.02911				3451400000	0.335493	orf19.3812	>orf19.3812 SSZ1 CGDID:CAL0001942 COORDS:Ca21chr4_C_albicans_SC5314:1007666-1009288W, translated using codon table 12 (540 amino acids) Verified ORF;Putative HSP70 chaperone;protein level decreases in stationary phase cultures
1.12516				18986000	0.335708	orf19.4544	>orf19.4544 orf19.4544 CGDID:CAL0002760 COORDS:Ca21chr1_C_albicans_SC5314:375852-376571W, translated using codon table 12 (239 amino acids) Uncharacterized ORF;Ortholog of <i>C. parapsilosis CDC317</i> : CPAR2_106830, <i>Debaryomyces hansenii CBS767</i> :
1.05725				145330000	0.335883	orf19.4892	>orf19.4892 TPK1 CGDID:CAL0005520 COORDS:Ca21chr1_C_albicans_SC5314:2256855-2255638C, translated using codon table 12 (405 amino acids) Verified ORF;Catalytic subunit of cAMP-dependent protein kinase (PKA), isoform of Tpk2p;involved in control of morphog
1.05009				305690000	0.336253	orf19.6417	>orf19.6417 TSR1 CGDID:CAL0002141 COORDS:Ca21chrR_C_albicans_SC5314:1832468-1834996W, translated using codon table 12 (842 amino acids) Verified ORF;Component of 20S pre-rRNA processing unit;decreased expression in response to prostaglandins
1.05007				270630000	0.33633	orf19.7153	>orf19.7153 orf19.7153 CGDID:CAL0003000 COORDS:Ca21chr7_C_albicans_SC5314:907312-904235C, translated using codon table 12 (1025 amino acids) Uncharacterized ORF;Putative exportin, member of the Exportin-T family
1.07181				39783000	0.336594	orf19.4846	>orf19.4846 orf19.4846 CGDID:CAL0005381 COORDS:Ca21chr1_C_albicans_SC5314:2148256-2149497W, translated using codon table 12 (413 amino acids) Verified ORF;GlcNAc-induced protein
1.04981				468710000	0.337275	orf19.1552	>orf19.1552 CPR3 CGDID:CAL0005525 COORDS:Ca21chr2_C_albicans_SC5314:461919-461344C, translated using codon table 12 (191 amino acids) Uncharacterized ORF;Putative peptidyl-prolyl cis-trans isomerase;macrophage-induced protein;protein levels decrease in
1.07136				85039000	0.337471	orf19.5959	>orf19.5959 NOP14 CGDID:CAL0003384 COORDS:Ca21chr3_C_albicans_SC5314:1052844-1055372W, translated using codon table 12 (842 amino acids) Verified ORF;Putative nucleolar protein;Hap43p-induced gene;mutation confers resistance to 5-fluorocytosine (5-FC),
1.05656				110830000	0.337765	orf19.2185	>orf19.2185 NSA1 CGDID:CAL0005449 COORDS:Ca21chr2_C_albicans_SC5314:1619808-1618588C, translated using codon table 12 (406 amino acids) Uncharacterized ORF;Putative 66S pre-ribosomal particles conmponent;Hap43p-induced gene;decreased expression in respo
1.02862				3524500000	0.337952	orf19.7312	>orf19.7312 ERG13 CGDID:CAL0004537 COORDS:Ca21chrR_C_albicans_SC5314:1952785-1951430C, translated using codon table 12 (451 amino acids) Verified ORF;3-hydroxy-3-methylglutaryl coenzyme A synthase;ergosterol biosynthesis protein;sumoylation target;tran
1.05648				98378000	0.337969	orf19.779	>orf19.779 HAT1 CGDID:CAL0001952 COORDS:Ca21chr1_C_albicans_SC5314:970989-972230W, translated using codon table 12 (413 amino acids) Uncharacterized ORF;Ortholog(s) have histone acetyltransferase activity, histone binding activity, role in chromatin silen
1.07105				41615000	0.338062	orf19.5553	>orf19.5553 orf19.5553 CGDID:CAL0006179 COORDS:Ca21chr6_C_albicans_SC5314:576424-576951W, translated using codon table 12 (175 amino acids) Uncharacterized ORF;Ortholog(s) have methionine-R-sulfoxide reductase activity, role in cellular response to oxidat
1.04945				274620000	0.338613	orf19.5054	>orf19.5054 orf19.5054 CGDID:CAL0001685 COORDS:Ca21chr1_C_albicans_SC5314:1707564-1708466W, translated using codon table 12 (300 amino acids) Uncharacterized ORF;Putative quinolinate phosphoribosyl transferase, involved in NAD biosynthesis;Hap43p-repress
1.04924				357960000	0.339382	orf19.5507	>orf19.5507 ENP1 CGDID:CAL0006067 COORDS:Ca21chr7_C_albicans_SC5314:824034-822607C, translated using codon table 12 (475 amino acids) Verified ORF;Protein similar to S. cerevisiae Enp1p;transposon mutation affects filamentous growth;decreased expression
1.02829				1100000000	0.339599	orf19.5440	>orf19.5440 RPT2 CGDID:CAL0005257 COORDS:Ca21chr3_C_albicans_SC5314:39195-40592W, translated using codon table 12 (465 amino acids) Uncharacterized ORF;Putative ATPase of the 19S regulatory particle of the 26S proteasome;oxidative stress-induced via Cap1
1.05581				207510000	0.339787	orf19.3649	>orf19.3649 orf19.3649 CGDID:CAL0000409 COORDS:Ca21chr6_C_albicans_SC5314:134314-135168W, translated using codon table 12 (284 amino acids) Uncharacterized ORF;Ortholog(s) have adenyl-nucleotide exchange factor activity, role in cytoplasmic translation an
1.07009				34368000	0.339902	orf19.1309	>orf19.1309 orf19.1309 CGDID:CAL0003711 COORDS:Ca21chr4_C_albicans_SC5314:787968-787555C, translated using codon table 12 (137 amino acids) Uncharacterized ORF;Ortholog of <i>C. parapsilosis CDC317</i> : CPAR2_403630, <i>Candida tenuis NRRL Y-1498</i> : C
1.1221				8258300	0.340038	orf19.2721	>orf19.2721 orf19.2721 CGDID:CAL0004196 COORDS:Ca21chr4_C_albicans_SC5314:580529-579492C, translated using codon table 12 (345 amino acids) Uncharacterized ORF;Ortholog(s) have role in meiosis, regulation of mitotic cell cycle, regulation of translation a
1.02821				6481500000	0.34004	orf19.5996.1	>orf19.5996.1 RPS19A CGDID:CAF0007061 COORDS:Ca21chr3_C_albicans_SC5314:1130360-1131164W, translated using codon table 12 (145 amino acids) Uncharacterized ORF;Putative ribosomal protein S19;protein level decreases in stationary phase cultures
1.04897				255090000	0.340397	orf19.815	>orf19.815 DCK1 CGDID:CAL0002646 COORDS:Ca21chr2_C_albicans_SC5314:853403-847659C, translated using codon table 12 (1914 amino acids) Verified ORF;Putative guanine nucleotide exchange factor required for embedded filamentous growth;activates Rac1p;conta
1.06963				50660000	0.340797	orf19.2867	>orf19.2867 orf19.2867 CGDID:CAL0005176 COORDS:Ca21chr4_C_albicans_SC5314:1484418-1486436W, translated using codon table 12 (672 amino acids) Uncharacterized ORF;Ortholog(s) have phosphatidylinositol-3-phosphate binding, protein transporter activity and r
1.06939				77349000	0.34126	orf19.6902	>orf19.6902 DBP7 CGDID:CAL0000117 COORDS:Ca21chr7_C_albicans_SC5314:252977-250794C, translated using codon table 12 (727 amino acids) Uncharacterized ORF;Putative ATP-dependent DEAD-box RNA helicase;Hap43p-induced gene;transcription is upregulated in bo
1.04873				256460000	0.341266	orf19.3761	>orf19.3761 CDC54 CGDID:CAL0001241 COORDS:Ca21chr1_C_albicans_SC5314:2741772-2739034C, translated using codon table 12 (912 amino acids) Uncharacterized ORF;Putative pre-replication complex helicase subunit;transcription is regulated by Nrg1p and Mig1p;
1.04869				252430000	0.341449	orf19.5229	>orf19.5229 orf19.5229 CGDID:CAL0003527 COORDS:Ca21chr1_C_albicans_SC5314:2690877-2693891W, translated using codon table 12 (1004 amino acids) Uncharacterized ORF;Ortholog(s) have 3-5-exoribonuclease activity, endoribonuclease activity, tRNA binding act
1.06901				60211000	0.341991	orf19.6369	>orf19.6369 RIO2 CGDID:CAL0001368 COORDS:Ca21chrR_C_albicans_SC5314:1765972-1764569C, translated using codon table 12 (467 amino acids) Uncharacterized ORF;Putative serine kinase with a predicted role in the processing of the 20S pre-rRNA into mature 18S
1.05449				112270000	0.343394	orf19.2504	>orf19.2504 BMS1 CGDID:CAL0002359 COORDS:Ca21chr3_C_albicans_SC5314:202855-206487W, translated using codon table 12 (1210 amino acids) Verified ORF;Putative GTPase;Hap43p-induced gene;mutation confers resistance to 5-fluorocytosine (5-FC);flucytosine i
1.06803				76961000	0.343877	orf19.4845	>orf19.4845 orf19.4845 CGDID:CAL0005379 COORDS:Ca21chr1_C_albicans_SC5314:2147583-2147062C, translated using codon table 12 (173 amino acids) Uncharacterized ORF;Putative integral membrane protein;fluconazole-induced
1.0679				42505000	0.34413	orf19.2016	>orf19.2016 orf19.2016 CGDID:CAL0004337 COORDS:Ca21chr2_C_albicans_SC5314:176936-176520C, translated using codon table 12 (138 amino acids) Uncharacterized ORF;Ortholog(s) have protein binding, bridging activity, role in ergosterol biosynthetic process an
1.05412				198160000	0.344379	orf19.7197	>orf19.7197 orf19.7197 CGDID:CAL0003167 COORDS:Ca21chr7_C_albicans_SC5314:850094-852331W, translated using codon table 12 (745 amino acids) Verified ORF;Putative intranuclear transport and DNA replication mediator;heterozygous null mutant exhibits resist
1.05374				148590000	0.345429	orf19.6589	>orf19.6589 orf19.6589 CGDID:CAL0003319 COORDS:Ca21chrR_C_albicans_SC5314:2069970-2068624C, translated using codon table 12 (448 amino acids) Uncharacterized ORF;Hap43p-induced gene;ortholog of <i>S. cerevisiae</i> SSF2 and SSF1, proteins involved in rib
1.04759				335800000	0.345516	orf19.5230	>orf19.5230 MRPS9 CGDID:CAL0003535 COORDS:Ca21chr1_C_albicans_SC5314:2690384-2689374C, translated using codon table 12 (336 amino acids) Verified ORF;Mitochondrial ribosomal protein S9;has N-terminal mitochondrial targeting signal and an S9 consensus mot
1.06689				48627000	0.346077	orf19.4963	>orf19.4963 orf19.4963 CGDID:CAL0006361 COORDS:Ca21chr1_C_albicans_SC5314:2915143-2916339W, translated using codon table 12 (398 amino acids) Uncharacterized ORF;Ortholog(s) have role in ER-associated protein catabolic process and cytoplasm, nucleolus loc
1.02696				2986400000	0.346312	orf19.269	>orf19.269 SES1 CGDID:CAL0004049 COORDS:Ca21chr3_C_albicans_SC5314:601355-602731W, translated using codon table 12 (458 amino acids) Verified ORF;Seryl-tRNA synthetase;charges the tRNA that recognizes the CUG codon, which typically specifies Leu, but spe
1.02694				958220000	0.346415	orf19.3022	>orf19.3022 orf19.3022 CGDID:CAL0001364 COORDS:Ca21chr1_C_albicans_SC5314:685483-686415W, translated using codon table 12 (310 amino acids) Uncharacterized ORF;Ortholog(s) have structural constituent of ribosome activity and mitochondrial small ribosomal
1.04734				451130000	0.346452	orf19.2352	>orf19.2352 orf19.2352 CGDID:CAL0000750 COORDS:Ca21chr1_C_albicans_SC5314:2374045-2375019W, translated using codon table 12 (324 amino acids) Uncharacterized ORF;Ortholog(s) have mitochondrion localization
1.06659				88992000	0.346658	orf19.7523	>orf19.7523 MKC1 CGDID:CAL0000003 COORDS:Ca21chrR_C_albicans_SC5314:32402-30873C, translated using codon table 12 (509 amino acids) Verified ORF;MAP kinase;role in biofilm formation, contact-induced invasive filamentation, systemic virulence in mouse, ce
1.05295				211570000	0.347595	orf19.1837	>orf19.1837 TBP1 CGDID:CAL0001658 COORDS:Ca21chr1_C_albicans_SC5314:2362662-2363378W, translated using codon table 12 (238 amino acids) Verified ORF;Transcription initiation factor;binds TATA box sequence, and binding does not require TFIIA;caspofungin
1.0468				710070000	0.348476	orf19.5083	>orf19.5083 DRG1 CGDID:CAL0001785 COORDS:Ca21chr1_C_albicans_SC5314:1767426-1768532W, translated using codon table 12 (368 amino acids) Verified ORF;Member of the DRG family of GTP-binding proteins;involved in regulation of invasive filamentous growth
1.05259				130190000	0.348583	orf19.4565	>orf19.4565 BGL2 CGDID:CAL0002830 COORDS:Ca21chr4_C_albicans_SC5314:445653-444727C, translated using codon table 12 (308 amino acids) Verified ORF;1,3-beta-Glucosyltransferase, cell wall enzyme;one of multiple 1,3-beta-glucosyltransferases;mutant has ce
1.05243				101250000	0.349013	orf19.3647	>orf19.3647 SEC8 CGDID:CAL0000407 COORDS:Ca21chr6_C_albicans_SC5314:137397-140720W, translated using codon table 12 (1107 amino acids) Verified ORF;Predicted subunit of the exocyst complex, involved in exocytosis;localizes to a crescent on the surface of
1.06533				74006000	0.34911	orf19.880	>orf19.880 orf19.880 CGDID:CAL0002889 COORDS:Ca21chr2_C_albicans_SC5314:712772-715804W, translated using codon table 12 (1010 amino acids) Uncharacterized ORF;Ortholog(s) have role in cargo loading into COPII-coated vesicle and COPII vesicle coat, cytosol
1.04635				627910000	0.350157	orf19.4491	>orf19.4491 ERG20 CGDID:CAL0002030 COORDS:Ca21chr2_C_albicans_SC5314:958692-959747W, translated using codon table 12 (351 amino acids) Uncharacterized ORF;Putative farnesyl pyrophosphate synthetase involved in isoprenoid and sterol biosynthesis, based on
1.02618				1478900000	0.350242	orf19.3599	>orf19.3599 TIF4631 CGDID:CAL0006026 COORDS:Ca21chr2_C_albicans_SC5314:1783309-1780055C, translated using codon table 12 (1084 amino acids) Uncharacterized ORF;Putative translation initiation factor eIF4G;overexpression causes hyperfilamentation;hyphal-
1.0463				598540000	0.350363	orf19.1619	>orf19.1619 orf19.1619 CGDID:CAL0006346 COORDS:Ca21chr3_C_albicans_SC5314:490943-489183C, translated using codon table 12 (586 amino acids) Uncharacterized ORF;Putative kinase subunit of RNA polymerase II carboxy-terminal domain kinase I;possibly an esse
1.02605				822790000	0.350908	orf19.2166	>orf19.2166 VMA5 CGDID:CAL0005394 COORDS:Ca21chr2_C_albicans_SC5314:1660762-1661928W, translated using codon table 12 (388 amino acids) Verified ORF;Putative vacuolar H(+)-ATPase;plasma membrane localized
1.02602				857270000	0.351075	orf19.7483	>orf19.7483 CRM1 CGDID:CAL0005701 COORDS:Ca21chrR_C_albicans_SC5314:125565-122326C, translated using codon table 12 (1079 amino acids) Verified ORF;Functional homolog of S. cerevisiae Crm1p, which acts in protein nuclear export;predicted to be resistant
1.06404				42519000	0.351621	orf19.2606	>orf19.2606 HDA1 CGDID:CAL0003359 COORDS:Ca21chrR_C_albicans_SC5314:451924-449423C, translated using codon table 12 (833 amino acids) Verified ORF;Histone deacetylase;conserved deacetylation motif;regulates white-to-opaque switching frequency but not op
1.05142				128270000	0.351793	orf19.6167	>orf19.6167 AYR1 CGDID:CAL0006073 COORDS:Ca21chr3_C_albicans_SC5314:182019-181138C, translated using codon table 12 (293 amino acids) Uncharacterized ORF;Putative oxidoreductase;transcriptionally induced by interaction with macrophage
1.0514				105870000	0.351853	orf19.4180	>orf19.4180 SEC72 CGDID:CAL0005843 COORDS:Ca21chr4_C_albicans_SC5314:110013-109399C, translated using codon table 12 (204 amino acids) Uncharacterized ORF;ER protein-translocation complex component;regulated by Gcn4p;repressed in response to amino acid
1.04569				256770000	0.352653	orf19.7292	>orf19.7292 ARP2 CGDID:CAL0004013 COORDS:Ca21chrR_C_albicans_SC5314:1915605-1916846W, translated using codon table 12 (391 amino acids) Verified ORF;Putative component of the Arp2/3 complex;required for virulence, hyphal growth, and cell wall and cytoske
1.06346				46270000	0.35275	orf19.6464	>orf19.6464 orf19.6464 CGDID:CAL0002255 COORDS:Ca21chr7_C_albicans_SC5314:529027-530880W, translated using codon table 12 (617 amino acids) Uncharacterized ORF;Predicted ORF in Assemblies 19, 20 and 21;induced upon adherence to polystyrene;oxidative str
1.0633				42718000	0.353063	orf19.5168	>orf19.5168 orf19.5168 CGDID:CAL0002631 COORDS:Ca21chr7_C_albicans_SC5314:636587-635283C, translated using codon table 12 (434 amino acids) Uncharacterized ORF;Ortholog(s) have role in maturation of SSU-rRNA and cytosol, nucleolus localization
1.02562				980450000	0.353131	orf19.4283	>orf19.4283 orf19.4283 CGDID:CAL0000353 COORDS:Ca21chr5_C_albicans_SC5314:601853-600846C, translated using codon table 12 (335 amino acids) Uncharacterized ORF;Ortholog(s) have role in translational initiation and cytosol, eukaryotic 43S preinitiation com
1.04541				572710000	0.353712	orf19.589	>orf19.589 VPS21 CGDID:CAL0000352 COORDS:Ca21chrR_C_albicans_SC5314:1759084-1758434C, translated using codon table 12 (216 amino acids) Verified ORF;Late endosomal Rab small monomeric GTPase involved in transport of endocytosed proteins to the vacuole;in
1.11243				13338000	0.353865	orf19.5345	>orf19.5345 orf19.5345 CGDID:CAL0004315 COORDS:Ca21chr2_C_albicans_SC5314:2196208-2197227W, translated using codon table 12 (339 amino acids) Uncharacterized ORF;Putative ubiquitin-like polyubiquitin-binding protein;induced by nitric oxide independent of
1.02543				1057300000	0.354077	orf19.1993	>orf19.1993 orf19.1993 CGDID:CAL0002740 COORDS:Ca21chr2_C_albicans_SC5314:226014-227255W, translated using codon table 12 (413 amino acids) Uncharacterized ORF;Ortholog(s) have structural molecule activity, role in proteasome assembly, ubiquitin-dependent
1.11219				28934000	0.354211	orf19.203	>orf19.203 STB3 CGDID:CAL0003869 COORDS:Ca21chr2_C_albicans_SC5314:1842962-1844473W, translated using codon table 12 (503 amino acids) Uncharacterized ORF;Putative SIN3-binding protein 3 homolog;caspofungin induced;macrophage/pseudohyphal-repressed
1.02538				4437300000	0.354356	orf19.1199	>orf19.1199 NOP5 CGDID:CAL0002164 COORDS:Ca21chr6_C_albicans_SC5314:66035-64485C, translated using codon table 12 (516 amino acids) Verified ORF;Protein similar to S. cerevisiae Nop5p protein of small nucleolar ribonucleoprotein complex;transposon mutati
1.11208				8187300	0.354369	orf19.4945	>orf19.4945 MSH6 CGDID:CAL0006305 COORDS:Ca21chr1_C_albicans_SC5314:2879371-2875727C, translated using codon table 12 (1214 amino acids) Uncharacterized ORF;Protein similar to S. cerevisiae Msh6p, which is involved in mismatch repair;repressed under Cdc5
1.04523				248000000	0.35438	orf19.4164	>orf19.4164 orf19.4164 CGDID:CAL0005783 COORDS:Ca21chr4_C_albicans_SC5314:135159-134425C, translated using codon table 12 (244 amino acids) Uncharacterized ORF;Ortholog(s) have mitochondrion, ribosome localization
1.06257				68285000	0.354499	orf19.4262	>orf19.4262 orf19.4262 CGDID:CAL0000283 COORDS:Ca21chr5_C_albicans_SC5314:559089-557647C, translated using codon table 12 (480 amino acids) Uncharacterized ORF;Ortholog(s) have mRNA binding activity and role in cellular protein complex localization, estab
1.11143				26509000	0.355314	orf19.4457	>orf19.4457 BNI4 CGDID:CAL0001878 COORDS:Ca21chr1_C_albicans_SC5314:811506-806539C, translated using codon table 12 (1655 amino acids) Verified ORF;Protein required for wild-type cell wall chitin distribution, morphology, hyphal growth;not essential;sim
1.04485				283570000	0.355802	orf19.7409	>orf19.7409 ERV25 CGDID:CAL0005428 COORDS:Ca21chr3_C_albicans_SC5314:1425325-1425972W, translated using codon table 12 (215 amino acids) Verified ORF;Component of COPII-coated vesicles;transcription induced upon filamentous growth
1.02509				1062100000	0.35584	orf19.6716	>orf19.6716 ABD1 CGDID:CAL0004754 COORDS:Ca21chr3_C_albicans_SC5314:1755845-1757269W, translated using codon table 12 (474 amino acids) Verified ORF;RNA (guanine-N7-)-methyltransferase, SAM-dependent;methylates mRNA 5 cap;binds phosphorylated RNA Pol I
1.04477				681140000	0.356091	orf19.3015	>orf19.3015 ARX1 CGDID:CAL0001348 COORDS:Ca21chr1_C_albicans_SC5314:679161-677467C, translated using codon table 12 (564 amino acids) Uncharacterized ORF;Putative ribosomal large subunit biogenesis protein;downregulated during core stress response;decre
1.04981				212470000	0.356233	orf19.1170	>orf19.1170 ARO7 CGDID:CAL0002091 COORDS:Ca21chr1_C_albicans_SC5314:2529344-2528538C, translated using codon table 12 (268 amino acids) Uncharacterized ORF;Putative chorismate mutase;fungal-specific (no human or murine homolog);alkaline upregulated
1.04974				181400000	0.356416	orf19.423	>orf19.423 orf19.423 CGDID:CAL0005611 COORDS:Ca21chr1_C_albicans_SC5314:1137366-1137923W, translated using codon table 12 (185 amino acids) Uncharacterized ORF;Ortholog(s) have enzyme activator activity, m7G(5)pppN diphosphatase activity, mRNA binding ac
1.04956				117950000	0.356914	orf19.1702	>orf19.1702 ARF3 CGDID:CAL0000758 COORDS:Ca21chr3_C_albicans_SC5314:315172-315812W, translated using codon table 12 (175 amino acids) Uncharacterized ORF;Transcription is filament induced;Tup1p regulated (see Locus History Note for Assembly 19 correction
1.11015				11226000	0.357153	orf19.2320	>orf19.2320 orf19.2320 CGDID:CAL0000691 COORDS:Ca21chr1_C_albicans_SC5314:2418349-2416868C, translated using codon table 12 (493 amino acids) Uncharacterized ORF;Putative serine/threonine-protein kinase;possibly an essential gene, disruptants not obtaine
1.02463				9390600000	0.358151	orf19.2435	>orf19.2435 MSI3 CGDID:CAL0001523 COORDS:Ca21chr1_C_albicans_SC5314:1280738-1278633C, translated using codon table 12 (701 amino acids) Verified ORF;Essential antigenic HSP70 family protein, required for fluconazole resistance and calcineurin-dependent tr
1.04419				249720000	0.358277	orf19.809	>orf19.809 orf19.809 CGDID:CAL0002615 COORDS:Ca21chr2_C_albicans_SC5314:869597-868233C, translated using codon table 12 (454 amino acids) Uncharacterized ORF;Ortholog(s) have role in maturation of LSU-rRNA from tricistronic rRNA transcript (SSU-rRNA, 5.8S
1.02453				59600000000	0.358673	orf19.2551	>orf19.2551 MET6 CGDID:CAL0002475 COORDS:Ca21chrR_C_albicans_SC5314:371056-368753C, translated using codon table 12 (767 amino acids) Verified ORF;Essential 5-methyltetrahydropteroyltriglutamate-homocysteine methyltransferase (cobalamin-independent methio
1.0439				454960000	0.3594	orf19.5226	>orf19.5226 WRS1 CGDID:CAL0003524 COORDS:Ca21chr1_C_albicans_SC5314:2697872-2696598C, translated using codon table 12 (424 amino acids) Uncharacterized ORF;Putative tRNA-Trp synthetase;genes encoding ribosomal subunits, translation factors, tRNA syntheta
1.04389				685110000	0.359435	orf19.1796	>orf19.1796 orf19.1796 CGDID:CAL0000999 COORDS:Ca21chr4_C_albicans_SC5314:1174948-1176042W, translated using codon table 12 (364 amino acids) Uncharacterized ORF;Ortholog(s) have oxidoreductase activity, acting on the CH-OH group of donors, NAD or NADP as
1.04862				101760000	0.359514	orf19.3949	>orf19.3949 orf19.3949 CGDID:CAL0002985 COORDS:Ca21chr5_C_albicans_SC5314:1009339-1005395C, translated using codon table 12 (1314 amino acids) Uncharacterized ORF;Ortholog(s) have chromatin binding, histone binding activity
1.04821				185620000	0.360647	orf19.6955	>orf19.6955 HBR3 CGDID:CAL0000302 COORDS:Ca21chr3_C_albicans_SC5314:770521-771921W, translated using codon table 12 (466 amino acids) Uncharacterized ORF;Essential protein;regulated by hemoglobin;S. cerevisiae ortholog is essential;Hap43p-induced gene
1.02409				2081900000	0.360951	orf19.5685	>orf19.5685 THS1 CGDID:CAL0000735 COORDS:Ca21chr5_C_albicans_SC5314:14674-12554C, translated using codon table 12 (706 amino acids) Uncharacterized ORF;Putative threonyl-tRNA synthetase;transcription regulated by Mig1p and Tup1p;downregulated upon phago
1.04331				600710000	0.361608	orf19.1229	>orf19.1229 orf19.1229 CGDID:CAL0002842 COORDS:Ca21chr1_C_albicans_SC5314:1672965-1669828C, translated using codon table 12 (1045 amino acids) Uncharacterized ORF;Ortholog(s) have importin-alpha export receptor activity, role in cell division, protein exp
1.04777				149930000	0.361875	orf19.1889	>orf19.1889 orf19.1889 CGDID:CAL0001798 COORDS:Ca21chr2_C_albicans_SC5314:1516534-1517256W, translated using codon table 12 (240 amino acids) Uncharacterized ORF;Putative phosphoglycerate mutase family protein;stationary phase enriched protein;early-sta
1.10669				13532000	0.362173	orf19.5887	>orf19.5887 NUP85 CGDID:CAL0002462 COORDS:Ca21chr3_C_albicans_SC5314:915536-913215C, translated using codon table 12 (773 amino acids) Verified ORF;Ortholog(s) have structural constituent of nuclear pore activity
1.04314				711080000	0.362261	orf19.7187	>orf19.7187 MAM33 CGDID:CAL0003133 COORDS:Ca21chr7_C_albicans_SC5314:862917-862123C, translated using codon table 12 (264 amino acids) Uncharacterized ORF;Putative mitochondrial acidic matrix protein;regulated by Ssn6p;protein present in exponential and
1.04752				113590000	0.362563	orf19.1228	>orf19.1228 HAP2 CGDID:CAL0002841 COORDS:Ca21chr1_C_albicans_SC5314:1668206-1669300W, translated using codon table 12 (364 amino acids) Verified ORF;CCAAT-binding factor regulates low-iron induction of FRP1, in these conditions CBF comprises Hap43p and pr
1.04747				141290000	0.362699	orf19.4502	>orf19.4502 orf19.4502 CGDID:CAL0002614 COORDS:Ca21chr2_C_albicans_SC5314:940777-946524W, translated using codon table 12 (1915 amino acids) Uncharacterized ORF;Ortholog(s) have ATPase activity, TBP-class protein binding activity
1.04727				187970000	0.363263	orf19.3031	>orf19.3031 SEC62 CGDID:CAL0001383 COORDS:Ca21chr1_C_albicans_SC5314:696971-696090C, translated using codon table 12 (293 amino acids) Verified ORF;Putative endoplasmic reticulum (ER) protein-translocation complex subunit
1.05779				43226000	0.36388	orf19.1708	>orf19.1708 orf19.1708 CGDID:CAL0000767 COORDS:Ca21chr3_C_albicans_SC5314:306821-307480W, translated using codon table 12 (219 amino acids) Uncharacterized ORF;Ortholog(s) have nucleolus localization
1.04269				313840000	0.363995	orf19.1095	>orf19.1095 orf19.1095 CGDID:CAL0001281 COORDS:Ca21chr6_C_albicans_SC5314:965793-964642C, translated using codon table 12 (383 amino acids) Uncharacterized ORF;Putative nuclear pore complex;possibly an essential gene, disruptants not obtained by UAU1 met
1.10542				30872000	0.364022	orf19.1244	>orf19.1244 GYP2 CGDID:CAL0002915 COORDS:Ca21chr4_C_albicans_SC5314:1230716-1233544W, translated using codon table 12 (942 amino acids) Uncharacterized ORF;Ortholog(s) have Rab GTPase activator activity, role in intracellular protein transport and cell di
1.04267				355560000	0.364057	orf19.4395	>orf19.4395 orf19.4395 CGDID:CAL0001184 COORDS:Ca21chrR_C_albicans_SC5314:783889-782048C, translated using codon table 12 (613 amino acids) Uncharacterized ORF;Putative actin cytoskeleton component;protein present in exponential and stationary growth pha
1.05761				84652000	0.364226	orf19.5597	>orf19.5597 POL5 CGDID:CAL0006292 COORDS:Ca21chr6_C_albicans_SC5314:655323-658490W, translated using codon table 12 (1055 amino acids) Uncharacterized ORF;Putative DNA Polymerase phi;induced upon biofilm formation
1.10526				16367000	0.364248	orf19.2928	>orf19.2928 orf19.2928 CGDID:CAL0005997 COORDS:Ca21chr1_C_albicans_SC5314:505263-504190C, translated using codon table 12 (357 amino acids) Uncharacterized ORF;Ortholog(s) have COPI-coated vesicle, Golgi apparatus localization
1.04677				165460000	0.364664	orf19.6295	>orf19.6295 MAS2 CGDID:CAL0000621 COORDS:Ca21chr5_C_albicans_SC5314:360974-362542W, translated using codon table 12 (522 amino acids) Uncharacterized ORF;Putative processing peptidase, catalytic (alpha) subunit;protein level decreases in stationary phase
1.05686				85805000	0.365715	orf19.4627	>orf19.4627 orf19.4627 CGDID:CAL0003646 COORDS:Ca21chr4_C_albicans_SC5314:329559-332903W, translated using codon table 12 (1114 amino acids) Uncharacterized ORF;Ortholog(s) have structural constituent of nuclear pore activity
1.10376				19221000	0.366433	orf19.3582	>orf19.3582 orf19.3582 CGDID:CAL0005994 COORDS:Ca21chr2_C_albicans_SC5314:1125339-1126138W, translated using codon table 12 (246 amino acids) Uncharacterized ORF;Ortholog(s) have protein-lysine N-methyltransferase activity, role in peptidyl-lysine dimethy
1.02298				15000000000	0.366629	orf19.3911	>orf19.3911 SAH1 CGDID:CAL0002855 COORDS:Ca21chr5_C_albicans_SC5314:947362-946010C, translated using codon table 12 (450 amino acids) Uncharacterized ORF;Putative S-adenosyl-L-homocysteine hydrolase;predicted enzyme of sulfur amino acid metabolism;antig
1.0229				2380000000	0.367052	orf19.2407	>orf19.2407 DPS1-1 CGDID:CAL0001457 COORDS:Ca21chrR_C_albicans_SC5314:715388-717124W, translated using codon table 12 (578 amino acids) Uncharacterized ORF;Putative tRNA-Asp synthetase;genes encoding ribosomal subunits, translation factors, tRNA syntheta
1.05613				66063000	0.367163	orf19.6573	>orf19.6573 BEM2 CGDID:CAL0003273 COORDS:Ca21chr7_C_albicans_SC5314:329717-336475W, translated using codon table 12 (2252 amino acids) Uncharacterized ORF;Putative Rho1p GTPase activating protein (GAP);serum-induced transcription
1.05579				48796000	0.367828	orf19.5500	>orf19.5500 MAK16 CGDID:CAL0006057 COORDS:Ca21chr2_C_albicans_SC5314:1301008-1300061C, translated using codon table 12 (315 amino acids) Uncharacterized ORF;Putative constituent of 66S pre-ribosomal particles;Hap43p-induced gene;decreased expression in
1.04165				706920000	0.367935	orf19.7484	>orf19.7484 ADE1 CGDID:CAL0005704 COORDS:Ca21chrR_C_albicans_SC5314:121861-120986C, translated using codon table 12 (291 amino acids) Verified ORF;Phosphoribosylaminoimadazole succinocarboxamide synthetase, enzyme of adenine biosynthesis;not induced in G
1.04139				300810000	0.368917	orf19.1214	>orf19.1214 orf19.1214 CGDID:CAL0002793 COORDS:Ca21chr6_C_albicans_SC5314:886677-888020W, translated using codon table 12 (447 amino acids) Uncharacterized ORF;Ortholog(s) have metalloaminopeptidase activity, role in protein initiator methionine removal i
1.10159				27522000	0.369599	orf19.4278	>orf19.4278 orf19.4278 CGDID:CAL0000324 COORDS:Ca21chr5_C_albicans_SC5314:588725-586716C, translated using codon table 12 (669 amino acids) Uncharacterized ORF;Ortholog(s) have methylated histone residue binding activity and role in negative regulation of
1.10159				7746300	0.369601	orf19.4677	>orf19.4677 orf19.4677 CGDID:CAL0003793 COORDS:Ca21chr4_C_albicans_SC5314:229969-229259C, translated using codon table 12 (236 amino acids) Uncharacterized ORF;Putative protein of unknown function, transcription is upregulated in clinical isolates from HI
1.10148				19770000	0.36976	orf19.2333	>orf19.2333 orf19.2333 CGDID:CAL0000720 COORDS:Ca21chr1_C_albicans_SC5314:2401214-2399724C, translated using codon table 12 (496 amino acids) Uncharacterized ORF;Ortholog(s) have role in retrograde transport, endosome to Golgi and cytosol, late endosome,
1.04484				127120000	0.370043	orf19.4503	>orf19.4503 orf19.4503 CGDID:CAL0002616 COORDS:Ca21chr2_C_albicans_SC5314:938829-939506W, translated using codon table 12 (225 amino acids) Uncharacterized ORF;Ortholog(s) have cytosol, nucleus localization
1.0546				62938000	0.370194	orf19.5486	>orf19.5486 orf19.5486 CGDID:CAL0005344 COORDS:Ca21chr2_C_albicans_SC5314:1269397-1272009W, translated using codon table 12 (870 amino acids) Verified ORF;Putative endoribonuclease;heterozygous null mutant exhibits hypersensitivity to parnafungin and cor
1.10079				21565000	0.370779	orf19.3862	>orf19.3862 orf19.3862 CGDID:CAL0002120 COORDS:Ca21chrR_C_albicans_SC5314:1298929-1299915W, translated using codon table 12 (328 amino acids) Uncharacterized ORF;Putative intracellular transport protein;heterozygous null mutant displays sensitivity to ra
1.05429				64273000	0.370801	orf19.5845	>orf19.5845 RNR3 CGDID:CAL0002354 COORDS:Ca21chrR_C_albicans_SC5314:1189667-1187217C, translated using codon table 12 (816 amino acids) Uncharacterized ORF;Putative ribonucleotide reductase large subunit;transcriptionally regulated by iron;expression gr
1.04075				447260000	0.371366	orf19.4045	>orf19.4045 EST1 CGDID:CAL0004815 COORDS:Ca21chr5_C_albicans_SC5314:1176415-1178253W, translated using codon table 12 (612 amino acids) Verified ORF;Telomerase subunit;allosteric activator of catalytic activity, but not required for catalytic activity;h
1.04028				482730000	0.373165	orf19.4605	>orf19.4605 TYR1 CGDID:CAL0003587 COORDS:Ca21chr4_C_albicans_SC5314:367992-369311W, translated using codon table 12 (439 amino acids) Uncharacterized ORF;Putative prepephenate dehydrogenase;enzyme of tyrosine biosynthesis;fungal-specific (no human or mu
1.02171				2950000000	0.373232	orf19.5647	>orf19.5647 SUB2 CGDID:CAL0000645 COORDS:Ca21chr4_C_albicans_SC5314:34763-33383C, translated using codon table 12 (433 amino acids) Uncharacterized ORF;Putative TREX complex component with a predicted role in nuclear mRNA export;transcription is regulate
1.02144				20800000000	0.374589	orf19.6854	>orf19.6854 ATP1 CGDID:CAL0005797 COORDS:Ca21chr1_C_albicans_SC5314:949400-951542W, translated using codon table 12 (546 amino acids) Verified ORF;ATP synthase alpha subunit;antigenic in human/mouse;at hyphal surface, not yeast;induced by ciclopirox, k
1.04319				91877000	0.374675	orf19.5418	>orf19.5418 orf19.5418 CGDID:CAL0005190 COORDS:Ca21chr3_C_albicans_SC5314:66463-67896W, translated using codon table 12 (477 amino acids) Uncharacterized ORF;Ortholog(s) have role in ER to Golgi vesicle-mediated transport and endoplasmic reticulum localiz
1.04315				109170000	0.374778	orf19.3438	>orf19.3438 orf19.3438 CGDID:CAL0004972 COORDS:Ca21chr6_C_albicans_SC5314:293962-292808C, translated using codon table 12 (384 amino acids) Uncharacterized ORF;Ortholog(s) have chaperone binding activity, role in ER-associated protein catabolic process, p
1.09756				26663000	0.375517	orf19.199	>orf19.199 orf19.199 CGDID:CAL0003292 COORDS:Ca21chr2_C_albicans_SC5314:1850993-1849458C, translated using codon table 12 (511 amino acids) Uncharacterized ORF;Predicted ORF in Assemblies 19, 20 and 21;hyphal-induced expression;greater mRNA abundance ob
1.04278				143600000	0.37583	orf19.3540	>orf19.3540 MAK5 CGDID:CAL0005900 COORDS:Ca21chr2_C_albicans_SC5314:1053006-1055354W, translated using codon table 12 (782 amino acids) Uncharacterized ORF;Putative nucleolar DEAD-box RNA helicase;oxidative stress-repressed via Cap1p;decreased expressio
1.02119				866510000	0.375929	orf19.3123	>orf19.3123 RPT5 CGDID:CAL0002261 COORDS:Ca21chr4_C_albicans_SC5314:1532862-1534154W, translated using codon table 12 (430 amino acids) Uncharacterized ORF;26S proteasome regulatory subunit;transcription is regulated by Nrg1p and Mig1p;regulated by Gcn2
1.04268				167470000	0.376088	orf19.6710	>orf19.6710 UTP9 CGDID:CAL0004741 COORDS:Ca21chr3_C_albicans_SC5314:1765414-1766751W, translated using codon table 12 (445 amino acids) Verified ORF;Small-subunit processome protein;expression downregulated in an ssr1 null mutant;decreased expression in
1.03942				274010000	0.376456	orf19.4188	>orf19.4188 NMD5 CGDID:CAL0005859 COORDS:Ca21chr4_C_albicans_SC5314:96782-93729C, translated using codon table 12 (1017 amino acids) Uncharacterized ORF;Protein not essential for viability;similar to S. cerevisiae Nmd5p, which is involved in protein-nucl
1.03939				338690000	0.376588	orf19.7335	>orf19.7335 PRE8 CGDID:CAL0004604 COORDS:Ca21chrR_C_albicans_SC5314:1989161-1990063W, translated using codon table 12 (251 amino acids) Uncharacterized ORF;Putative alpha-2_sc subunit of proteasome;macrophage-induced protein;regulated by Gcn2p and Gcn4p
1.02103				6296900000	0.376763	orf19.2138	>orf19.2138 ILS1 CGDID:CAL0005329 COORDS:Ca21chr6_C_albicans_SC5314:1005464-1008730W, translated using codon table 12 (1088 amino acids) Uncharacterized ORF;Putative isoleucyl-tRNA synthetase, the target of drugs including the cyclic beta-amino acid icofu
1.03927				244630000	0.377062	orf19.6693	>orf19.6693 orf19.6693 CGDID:CAL0004149 COORDS:Ca21chr7_C_albicans_SC5314:806381-802950C, translated using codon table 12 (1143 amino acids) Uncharacterized ORF;Ortholog(s) have cytosol, nucleus localization
1.05111				63842000	0.377132	orf19.5463	>orf19.5463 SEC6 CGDID:CAL0005292 COORDS:Ca21chr3_C_albicans_SC5314:19533-17074C, translated using codon table 12 (819 amino acids) Verified ORF;Predicted subunit of the exocyst complex, involved in exocytosis;localizes to a crescent on the surface of th
1.02094				8206500000	0.377219	orf19.7097	>orf19.7097 orf19.7097 CGDID:CAL0002199 COORDS:Ca21chr7_C_albicans_SC5314:35195-34632C, translated using codon table 12 (187 amino acids) Verified ORF;Putative cytoplasmic RNA-binding protein;heterozygous null mutant exhibits hypersensitivity to parnafun
1.05103				77314000	0.377306	orf19.3804	>orf19.3804 orf19.3804 CGDID:CAL0001904 COORDS:Ca21chr4_C_albicans_SC5314:1018439-1017672C, translated using codon table 12 (255 amino acids) Uncharacterized ORF;Predicted ORF in Assemblies 19, 20 and 21;filament induced
1.04224				221950000	0.377342	orf19.688	>orf19.688 orf19.688 CGDID:CAL0001141 COORDS:Ca21chr6_C_albicans_SC5314:404702-404055C, translated using codon table 12 (215 amino acids) Uncharacterized ORF;Ortholog(s) have structural constituent of ribosome activity and mitochondrial small ribosomal su
1.04216				109650000	0.377558	orf19.2488	>orf19.2488 FAL1 CGDID:CAL0001638 COORDS:Ca21chr1_C_albicans_SC5314:1182403-1181204C, translated using codon table 12 (399 amino acids) Uncharacterized ORF;Ortholog(s) have role in maturation of SSU-rRNA from tricistronic rRNA transcript (SSU-rRNA, 5.8S r
1.05084				72958000	0.377677	orf19.4144	>orf19.4144 orf19.4144 CGDID:CAL0005714 COORDS:Ca21chr5_C_albicans_SC5314:332823-331012C, translated using codon table 12 (603 amino acids) Uncharacterized ORF;Predicted ORF in Assemblies 19, 20 and 21;clade-associated gene expression
1.03902				590250000	0.378029	orf19.5698	>orf19.5698 orf19.5698 CGDID:CAL0000752 COORDS:Ca21chr5_C_albicans_SC5314:3999-4808W, translated using codon table 12 (269 amino acids) Uncharacterized ORF;Putative mitochondrial ribosomal protein of the large subunit;transcription is upregulated in clin
1.0958				23286000	0.3781	orf19.2135	>orf19.2135 TSM1 CGDID:CAL0005325 COORDS:Ca21chr6_C_albicans_SC5314:1003738-999461C, translated using codon table 12 (1425 amino acids) Uncharacterized ORF;Putative transcription initiation factor TFIID subunit;transcription is upregulated in clinical is
1.02068				2547600000	0.378585	orf19.4718	>orf19.4718 TRP5 CGDID:CAL0004378 COORDS:Ca21chr4_C_albicans_SC5314:1360213-1358105C, translated using codon table 12 (702 amino acids) Verified ORF;Predicted tryptophan synthase;identified in detergent-resistant membrane fraction (possible lipid raft co
1.02067				8437200000	0.378613	orf19.3087 orf19.6771	>orf19.3087 UBI3 CGDID:CAL0001506 COORDS:Ca21chr4_C_albicans_SC5314:1585505-1586086W, translated using codon table 12 (193 amino acids) Verified ORF;Fusion of ubiquitin with the S34 protein of the small ribosomal subunit;mRNA decreases upon heat shock, a
1.05034				33315000	0.378669	orf19.2385	>orf19.2385 KTI12 CGDID:CAL0000813 COORDS:Ca21chrR_C_albicans_SC5314:750070-749204C, translated using codon table 12 (288 amino acids) Uncharacterized ORF;Protein similar to S. cerevisiae Kti12p, which associates with Elongator complex;has a role in resi
1.03869				249190000	0.379272	orf19.2283	>orf19.2283 DQD1 CGDID:CAL0006377 COORDS:Ca21chr2_C_albicans_SC5314:1481049-1480609C, translated using codon table 12 (146 amino acids) Uncharacterized ORF;Putative 3-dehydroquinate dehydratase;biofilm-induced gene;ketoconazole-repressed;macrophage-dow
1.03867				662440000	0.379356	orf19.2974	>orf19.2974 YKT6 CGDID:CAL0006106 COORDS:Ca21chr1_C_albicans_SC5314:603791-603189C, translated using codon table 12 (200 amino acids) Verified ORF;Putative protein of the vacuolar SNARE complex with a predicted role in vacuolar fusion
1.04121				157610000	0.380235	orf19.5630	>orf19.5630 APA2 CGDID:CAL0000610 COORDS:Ca21chr6_C_albicans_SC5314:717762-716662C, translated using codon table 12 (366 amino acids) Uncharacterized ORF;Putative ATP adenylyltransferase II;regulated by Gcn4p;repressed in response to amino acid starvati
1.02034				7556800000	0.380359	orf19.88	>orf19.88 ILV5 CGDID:CAL0000685 COORDS:Ca21chr6_C_albicans_SC5314:171374-170172C, translated using codon table 12 (400 amino acids) Verified ORF;Ketol-acid reductoisomerase;antigenic in human/murine infection;regulated by Gcn4p;GlcNAc, amino acid starv
1.0202				3815100000	0.381092	orf19.754	>orf19.754 YBN5 CGDID:CAL0001864 COORDS:Ca21chr1_C_albicans_SC5314:1015852-1017042W, translated using codon table 12 (396 amino acids) Uncharacterized ORF;Ortholog(s) have ATPase activity and cytosol, nucleus localization
1.09357				14883000	0.381388	orf19.4379 orf19.4380.1	>orf19.4379 PRP13 CGDID:CAL0001123 COORDS:Ca21chrR_C_albicans_SC5314:849450-852053W, translated using codon table 12 (867 amino acids) Uncharacterized ORF;Putative integral inner mitochondrial membrane protein with similarity to exonucleases;>orf19.4380.1
1.02013				5581800000	0.381439	orf19.1750	>orf19.1750 SLR1 CGDID:CAL0000867 COORDS:Ca21chr2_C_albicans_SC5314:2120962-2122595W, translated using codon table 12 (263 amino acids) Uncharacterized ORF;Protein similar to mammalian SR-like RNA splicing factor;gene has intron;significant changes made
1.02012				5240000000	0.381483	orf19.4602	>orf19.4602 MDH1-1 CGDID:CAL0003583 COORDS:Ca21chr4_C_albicans_SC5314:371508-370510C, translated using codon table 12 (332 amino acids) Uncharacterized ORF;Predicted malate dehydrogenase precursor;macrophage-induced transcript;protein present in exponen
1.04061				241800000	0.381934	orf19.1528	>orf19.1528 orf19.1528 CGDID:CAL0005448 COORDS:Ca21chr2_C_albicans_SC5314:416571-417626W, translated using codon table 12 (351 amino acids) Uncharacterized ORF;Putative mitochondrial RNA polymerase specificity factor;possibly an essential gene, disruptan
1.04867				54817000	0.382007	orf19.6056	>orf19.6056 orf19.6056 CGDID:CAL0005147 COORDS:Ca21chr1_C_albicans_SC5314:81234-81902W, translated using codon table 12 (222 amino acids) Uncharacterized ORF;Ortholog(s) have phosphatase activity, role in dephosphorylation and cytosol, nucleus localizatio
1.04866				32607000	0.382035	orf19.6418	>orf19.6418 orf19.6418 CGDID:CAL0002143 COORDS:Ca21chrR_C_albicans_SC5314:1835222-1836484W, translated using codon table 12 (420 amino acids) Uncharacterized ORF;Ortholog(s) have role in ribosomal large subunit biogenesis and cytoplasm, nucleus localizati
1.04863				42805000	0.382093	orf19.164	>orf19.164 orf19.164 CGDID:CAL0003185 COORDS:Ca21chrR_C_albicans_SC5314:575931-574726C, translated using codon table 12 (401 amino acids) Uncharacterized ORF;Ortholog(s) have lipase activity and peroxisomal matrix localization
1.03776				411820000	0.382874	orf19.5834	>orf19.5834 orf19.5834 CGDID:CAL0002327 COORDS:Ca21chr2_C_albicans_SC5314:542346-545354W, translated using codon table 12 (1002 amino acids) Uncharacterized ORF;Ortholog(s) have protein transporter activity, role in mRNA export from nucleus and cytoplasm,
1.01983				37900000000	0.382985	orf19.6367	>orf19.6367 SSB1 CGDID:CAL0001367 COORDS:Ca21chrR_C_albicans_SC5314:1762547-1764388W, translated using codon table 12 (613 amino acids) Verified ORF;HSP70 family heat shock protein;mRNA in yeast cells and germ tubes;at surface of yeast cells, not hyphae
1.0401				195820000	0.383384	orf19.895	>orf19.895 HOG1 CGDID:CAL0002931 COORDS:Ca21chr2_C_albicans_SC5314:692680-691547C, translated using codon table 12 (377 amino acids) Verified ORF;MAP kinase of osmotic-, heavy metal-, and core stress response;role in regulation of glycerol, D-arabitol in
1.04799				45654000	0.383385	orf19.5618	>orf19.5618 orf19.5618 CGDID:CAL0000568 COORDS:Ca21chr6_C_albicans_SC5314:692998-691040C, translated using codon table 12 (652 amino acids) Uncharacterized ORF;Ortholog(s) have SNARE binding, unfolded protein binding activity
1.09217				18411000	0.38346	orf19.7119	>orf19.7119 RAD3 CGDID:CAL0002854 COORDS:Ca21chr7_C_albicans_SC5314:5761-3464C, translated using codon table 12 (765 amino acids) Verified ORF;Ortholog of <i>S. cerevisiae</i> RAD3;has helicase activity on a duplex DNA substrate
1.04737				43660000	0.384618	orf19.3370	>orf19.3370 DOT4 CGDID:CAL0004185 COORDS:Ca21chr4_C_albicans_SC5314:721235-719028C, translated using codon table 12 (735 amino acids) Verified ORF;Protein similar to ubiquitin C-terminal hydrolase;localizes to cell surface of hyphal cells, but not yeast-
1.01942				823490000	0.38515	orf19.2622	>orf19.2622 YPT31 CGDID:CAL0003404 COORDS:Ca21chrR_C_albicans_SC5314:1628715-1628047C, translated using codon table 12 (222 amino acids) Verified ORF;Protein required for resistance to toxic ergosterol analog
1.0194				1318600000	0.385227	orf19.2041	>orf19.2041 orf19.2041 CGDID:CAL0004406 COORDS:Ca21chr2_C_albicans_SC5314:142396-140486C, translated using codon table 12 (636 amino acids) Uncharacterized ORF;Ortholog(s) have DNA translocase activity, histone acetyl-lysine binding activity
1.09075				21629000	0.385558	orf19.1049	>orf19.1049 orf19.1049 CGDID:CAL0001159 COORDS:Ca21chr1_C_albicans_SC5314:869162-868578C, translated using codon table 12 (194 amino acids) Uncharacterized ORF;Hap43p-induced gene;expression upregulated during planktonic growth
1.04665				67806000	0.386067	orf19.702	>orf19.702 orf19.702 CGDID:CAL0001700 COORDS:Ca21chrR_C_albicans_SC5314:1439673-1436356C, translated using codon table 12 (1105 amino acids) Uncharacterized ORF;Ortholog(s) have DNA helicase activity, role in regulation of translational termination and po
1.01923				26200000000	0.386141	orf19.5341 orf19.3354	>orf19.5341 RPS4A CGDID:CAL0004310 COORDS:Ca21chr2_C_albicans_SC5314:2189961-2190749W, translated using codon table 12 (262 amino acids) Uncharacterized ORF;Predicted ribosomal protein;genes encoding cytoplasmic ribosomal subunits, translation factors, a
1.09011				24296000	0.386506	orf19.3990	>orf19.3990 orf19.3990 CGDID:CAL0003169 COORDS:Ca21chr5_C_albicans_SC5314:1097705-1098196W, translated using codon table 12 (163 amino acids) Uncharacterized ORF;Ortholog(s) have DNA-directed RNA polymerase activity, role in tRNA transcription from RNA po
1.03899				229090000	0.386509	orf19.5467 orf19.7127 orf19.3074 orf19.362 orf19.2661 orf19.6191 orf19.5700 orf19.6337 orf19.7544 orf19.4054 orf19.6112 orf19.7680 orf19.1925	>orf19.5467 TLO7 CGDID:CAL0005302 COORDS:Ca21chr3_C_albicans_SC5314:13756-14265W, translated using codon table 12 (169 amino acids) Uncharacterized ORF;Member of a family of telomere-proximal genes of unknown function;may be spliced in vivo;>orf19.7127 T
1.03896				152000000	0.386605	orf19.1566	>orf19.1566 UTP21 CGDID:CAL0005566 COORDS:Ca21chr2_C_albicans_SC5314:481408-484236W, translated using codon table 12 (942 amino acids) Verified ORF;Putative U3 snoRNP protein;Hap43p-induced gene;physically interacts with TAP-tagged Nop1p
1.03894				109310000	0.386674	orf19.7664	>orf19.7664 orf19.7664 CGDID:CAL0000947 COORDS:Ca21chrR_C_albicans_SC5314:2273334-2272930C, translated using codon table 12 (134 amino acids) Uncharacterized ORF;Ortholog(s) have nucleolus localization
1.03666				765710000	0.387101	orf19.4796	>orf19.4796 orf19.4796 CGDID:CAL0004617 COORDS:Ca21chr1_C_albicans_SC5314:2060917-2061447W, translated using codon table 12 (176 amino acids) Uncharacterized ORF;Putative eIF-4E-binding repressor of CAP-dependent translation;stationary phase enriched pro
1.01899				5037900000	0.387426	orf19.4635	>orf19.4635 NIP1 CGDID:CAL0003672 COORDS:Ca21chr4_C_albicans_SC5314:310023-312647W, translated using codon table 12 (874 amino acids) Verified ORF;Putative translation initiation factor;mutation confers hypersensitivity to roridin A and verrucarin A;gen
1.03642				429650000	0.388058	orf19.3211	>orf19.3211 RCF3 CGDID:CAL0003213 COORDS:Ca21chr5_C_albicans_SC5314:881301-882415W, translated using codon table 12 (347 amino acids) Uncharacterized ORF;Putative heteropentameric replication factor C subunit;transcription is induced upon filamentous gro
1.08888				7977100	0.388337	orf19.2749	>orf19.2749 orf19.2749 CGDID:CAL0004234 COORDS:Ca21chr4_C_albicans_SC5314:515620-514148C, translated using codon table 12 (490 amino acids) Uncharacterized ORF;Biofilm-induced gene;transcriptionally activated by Mnl1p under weak acid stress
1.03627				384340000	0.388647	orf19.3058	>orf19.3058 orf19.3058 CGDID:CAL0001438 COORDS:Ca21chr1_C_albicans_SC5314:746407-744965C, translated using codon table 12 (480 amino acids) Uncharacterized ORF;Ortholog(s) have role in ubiquinone biosynthetic process and mitochondrial inner membrane local
1.01872				1916500000	0.388799	orf19.7626	>orf19.7626 EIF4E CGDID:CAL0000850 COORDS:Ca21chrR_C_albicans_SC5314:2230355-2230984W, translated using codon table 12 (209 amino acids) Verified ORF;Translation initiation factor eIF4E;genes encoding ribosomal subunits, translation factors, tRNA synthet
1.03602				334970000	0.389601	orf19.5459	>orf19.5459 orf19.5459 CGDID:CAL0005282 COORDS:Ca21chr3_C_albicans_SC5314:21179-19602C, translated using codon table 12 (525 amino acids) Uncharacterized ORF;Putative mRNA polyadenylation regulating protein;Hap43p-repressed gene, transcription is upregul
1.03787				129040000	0.389708	orf19.825	>orf19.825 GCD7 CGDID:CAL0002680 COORDS:Ca21chr2_C_albicans_SC5314:836207-837304W, translated using codon table 12 (365 amino acids) Uncharacterized ORF;Putative translation initiator;downregulated in the presence of human whole blood or polymorphonuclea
1.0447				36252000	0.389985	orf19.1300	>orf19.1300 orf19.1300 CGDID:CAL0003697 COORDS:Ca21chr4_C_albicans_SC5314:802162-800828C, translated using codon table 12 (444 amino acids) Verified ORF;Putative mitochondrial membrane protein;homozygous transposon insertion causes decreased colony wrink
1.03766				218140000	0.390298	orf19.3276	>orf19.3276 PWP2 CGDID:CAL0003392 COORDS:Ca21chrR_C_albicans_SC5314:189010-186242C, translated using codon table 12 (922 amino acids) Verified ORF;Putative 90S pre-ribosomal component;Hap43p-induced gene;downregulated during core stress response;decrea
1.01824				994080000	0.391364	orf19.3564	>orf19.3564 RPC40 CGDID:CAL0005950 COORDS:Ca21chr2_C_albicans_SC5314:1099029-1098019C, translated using codon table 12 (336 amino acids) Uncharacterized ORF;Puttive RNA polymerase;protein level decreases in stationary phase cultures;Hap43p-induced gene
1.03527				695120000	0.392498	orf19.3532	>orf19.3532 MRPL10 CGDID:CAL0005873 COORDS:Ca21chr2_C_albicans_SC5314:1041938-1041087C, translated using codon table 12 (283 amino acids) Uncharacterized ORF;Putative mitochondrial large subunit ribosomal protein;shows colony morphology-related gene regu
1.08605				20114000	0.392537	orf19.4257	>orf19.4257 INT1 CGDID:CAL0000261 COORDS:Ca21chr5_C_albicans_SC5314:547677-553247W, translated using codon table 12 (1711 amino acids) Verified ORF;Integrin-like protein;role in morphogenesis, adhesion, and mouse cecal colonization and systemic virulence
1.03525				500130000	0.392598	orf19.4633	>orf19.4633 orf19.4633 CGDID:CAL0003668 COORDS:Ca21chr4_C_albicans_SC5314:314590-315396W, translated using codon table 12 (268 amino acids) Uncharacterized ORF;Ortholog(s) have carbonyl reductase (NADPH) activity, oxidoreductase activity, acting on the al
1.0859				21287000	0.392755	orf19.3980	>orf19.3980 orf19.3980 CGDID:CAL0003134 COORDS:Ca21chr5_C_albicans_SC5314:1073719-1067930C, translated using codon table 12 (1929 amino acids) Uncharacterized ORF;Ortholog(s) have role in cytoplasmic translation, regulation of translation and cytosol, pol
1.03671				125820000	0.392991	orf19.3333	>orf19.3333 orf19.3333 CGDID:CAL0004117 COORDS:Ca21chr1_C_albicans_SC5314:288046-289341W, translated using codon table 12 (431 amino acids) Uncharacterized ORF;Ortholog(s) have poly(A) RNA binding activity, role in mRNA polyadenylation, poly(A)+ mRNA expo
1.01789				6294600000	0.393174	orf19.387	>orf19.387 GCR3 CGDID:CAL0004925 COORDS:Ca21chr1_C_albicans_SC5314:1851872-1854532W, translated using codon table 12 (886 amino acids) Verified ORF;Functional homolog of S. cerevisiae Gcr3p, which acts in regulation of glycolytic genes;no intron predicte
1.04312				78669000	0.393176	orf19.4468	>orf19.4468 orf19.4468 CGDID:CAL0001921 COORDS:Ca21chr1_C_albicans_SC5314:832188-832697W, translated using codon table 12 (169 amino acids) Verified ORF;Putative succinate dehydrogenase;localized to the mitochondrial membrane;Hap43p-repressed gene
1.08554				21608000	0.39329	orf19.2736	>orf19.2736 HFL2 CGDID:CAL0004217 COORDS:Ca21chr4_C_albicans_SC5314:547581-547141C, translated using codon table 12 (146 amino acids) Uncharacterized ORF;HAP5-like protein;flucytosine induced
1.04305				82631000	0.39332	orf19.5764	>orf19.5764 SKI8 CGDID:CAL0001491 COORDS:Ca21chr6_C_albicans_SC5314:846141-844987C, translated using codon table 12 (384 amino acids) Uncharacterized ORF;Ortholog(s) have role in nuclear-transcribed mRNA catabolic process, 3-5 exonucleolytic nonsense-me
1.04295				58299000	0.393526	orf19.1761	>orf19.1761 orf19.1761 CGDID:CAL0000897 COORDS:Ca21chr2_C_albicans_SC5314:2095818-2096333W, translated using codon table 12 (171 amino acids) Uncharacterized ORF;Ortholog(s) have dolichyl-diphosphooligosaccharide-protein glycotransferase activity, role in
1.01772				6642400000	0.394069	orf19.1630	>orf19.1630 orf19.1630 CGDID:CAL0006396 COORDS:Ca21chr3_C_albicans_SC5314:469711-467187C, translated using codon table 12 (760 amino acids) Uncharacterized ORF;Ortholog(s) have cytoplasm localization
1.01769				3495800000	0.394248	orf19.492	>orf19.492 ADE17 CGDID:CAL0005864 COORDS:Ca21chrR_C_albicans_SC5314:919622-917844C, translated using codon table 12 (592 amino acids) Verified ORF;5-Aminoimidazole-4-carboxamide ribotide transformylase, enzyme of adenine biosynthesis;antigenic in human;
1.01765				2452500000	0.394445	orf19.6665	>orf19.6665 orf19.6665 CGDID:CAL0004089 COORDS:Ca21chr5_C_albicans_SC5314:794542-796920W, translated using codon table 12 (792 amino acids) Uncharacterized ORF;Ortholog(s) have nucleocytoplasmic transporter activity
1.01764				8711100000	0.394513	orf19.2340	>orf19.2340 CDC48 CGDID:CAL0000732 COORDS:Ca21chr1_C_albicans_SC5314:2390766-2393246W, translated using codon table 12 (826 amino acids) Verified ORF;Putative microsomal ATPase;plasma membrane-localized;regulated by Gcn2p and Gcn4p;induced by amino aci
1.03571				151240000	0.39584	orf19.706	>orf19.706 NMD3 CGDID:CAL0001704 COORDS:Ca21chrR_C_albicans_SC5314:1443627-1445189W, translated using codon table 12 (520 amino acids) Uncharacterized ORF;Putative nonsense-mediated mRNA decay protein;downregulated in core stress response;decreased expr
1.04148				45675000	0.396503	orf19.1673	>orf19.1673 PPT1 CGDID:CAL0000106 COORDS:Ca21chr3_C_albicans_SC5314:371638-369944C, translated using codon table 12 (564 amino acids) Uncharacterized ORF;Putative serine/threonine phosphatase;transcriptionally regulated by iron;expression greater in hig
1.03542				160800000	0.396674	orf19.2102	>orf19.2102 CKB1 CGDID:CAL0005264 COORDS:Ca21chr2_C_albicans_SC5314:38158-37277C, translated using codon table 12 (293 amino acids) Verified ORF;Regulatory subunit of protein kinase CK2 (casein kinase II), beta subunit;null mutants are hypersensitive to
1.08316				26108000	0.396841	orf19.1531	>orf19.1531 orf19.1531 CGDID:CAL0005466 COORDS:Ca21chr2_C_albicans_SC5314:422123-419748C, translated using codon table 12 (791 amino acids) Uncharacterized ORF;Ortholog(s) have RNA binding, protein heterodimerization activity, role in mRNA cleavage, mRNA
1.04113				81326000	0.3972	orf19.3103	>orf19.3103 orf19.3103 CGDID:CAL0002215 COORDS:Ca21chr4_C_albicans_SC5314:1557984-1562330W, translated using codon table 12 (1448 amino acids) Uncharacterized ORF;Ortholog(s) have DNA-directed RNA polymerase activity, role in tRNA transcription from RNA p
1.03519				157400000	0.397338	orf19.7422	>orf19.7422 orf19.7422 CGDID:CAL0005488 COORDS:Ca21chr3_C_albicans_SC5314:1456909-1455737C, translated using codon table 12 (390 amino acids) Uncharacterized ORF;Ortholog(s) have RNA binding activity and nucleus localization
1.03399				525210000	0.397511	orf19.1569	>orf19.1569 UTP22 CGDID:CAL0005569 COORDS:Ca21chr2_C_albicans_SC5314:491423-487896C, translated using codon table 12 (1175 amino acids) Verified ORF;Putative U3 snoRNP protein;expression downregulated in an ssr1 null mutant;decreased expression in respo
1.08254				25600000	0.39777	orf19.4474	>orf19.4474 orf19.4474 CGDID:CAL0001956 COORDS:Ca21chr1_C_albicans_SC5314:839354-840280W, translated using codon table 12 (308 amino acids) Uncharacterized ORF;Ortholog(s) have cytoplasm, nucleus localization
1.04077				55014000	0.397931	orf19.7069	>orf19.7069 orf19.7069 CGDID:CAL0002118 COORDS:Ca21chr7_C_albicans_SC5314:81905-81174C, translated using codon table 12 (243 amino acids) Verified ORF;Putative AdoMet-dependent proline methyltransferase;Hap43p-induced gene;required for normal biofilm gr
1.03488				137040000	0.398228	orf19.2363	>orf19.2363 orf19.2363 CGDID:CAL0000764 COORDS:Ca21chrR_C_albicans_SC5314:1510636-1511181W, translated using codon table 12 (181 amino acids) Uncharacterized ORF;Ortholog(s) have thiosulfate sulfurtransferase activity and mitochondrion localization
1.04063				63782000	0.39823	orf19.3225	>orf19.3225 CWH43 CGDID:CAL0003256 COORDS:Ca21chrR_C_albicans_SC5314:310304-307236C, translated using codon table 12 (1022 amino acids) Uncharacterized ORF;Putative sensor/transporter protein with a predicted role in cell wall biogenesis;transcription is
1.01685				1337300000	0.398669	orf19.5964 orf19.6447	>orf19.5964 ARF2 CGDID:CAL0003401 COORDS:Ca21chr3_C_albicans_SC5314:1066235-1066780W, translated using codon table 12 (181 amino acids) Verified ORF;Putative ADP-ribosylation factor;mutation confers hypersensitivity to Brefeldin A;>orf19.6447 ARF1 CGDID:
1.03468				131870000	0.398787	orf19.2640	>orf19.2640 FUR1 CGDID:CAL0003450 COORDS:Ca21chr5_C_albicans_SC5314:766939-766283C, translated using codon table 12 (218 amino acids) Verified ORF;Uracil phosphoribosyltransferase;predicted tetrameric enzyme of pyrimidine salvage;mutations associated wi
1.04014				32876000	0.399228	orf19.7572	>orf19.7572 SPT7 CGDID:CAL0000166 COORDS:Ca21chrR_C_albicans_SC5314:2135360-2139283W, translated using codon table 12 (1307 amino acids) Verified ORF;Putative SAGA transcriptional regulatory complex subunit;mutation confers hypersensitivity to toxic ergo
1.03451				131150000	0.399295	orf19.1514	>orf19.1514 orf19.1514 CGDID:CAL0005407 COORDS:Ca21chr2_C_albicans_SC5314:386900-387922W, translated using codon table 12 (340 amino acids) Uncharacterized ORF;Ortholog(s) have enzyme binding, phosphatidylinositol-4-phosphate binding activity and role in
1.03346				255430000	0.39959	orf19.2594	>orf19.2594 orf19.2594 CGDID:CAL0002566 COORDS:Ca21chrR_C_albicans_SC5314:427492-428391W, translated using codon table 12 (299 amino acids) Uncharacterized ORF;Ortholog(s) have DNA-directed RNA polymerase activity, role in transcription of nuclear large r
1.08125				31267000	0.399706	orf19.1160	>orf19.1160 orf19.1160 CGDID:CAL0002067 COORDS:Ca21chr1_C_albicans_SC5314:2547774-2548421W, translated using codon table 12 (215 amino acids) Uncharacterized ORF;Ortholog(s) have COPII adaptor activity and role in ER to Golgi vesicle-mediated transport, f
1.01653				1585700000	0.400346	orf19.3171	>orf19.3171 ACH1 CGDID:CAL0002388 COORDS:Ca21chr5_C_albicans_SC5314:448569-446995C, translated using codon table 12 (524 amino acids) Verified ORF;Acetyl-coA hydrolase;acetate utilization;nonessential;soluble protein in hyphae;antigenic in human;indu
1.08018				22504000	0.401309	orf19.4375	>orf19.4375 orf19.4375 CGDID:CAL0001114 COORDS:Ca21chrR_C_albicans_SC5314:839137-839925W, translated using codon table 12 (262 amino acids) Uncharacterized ORF;Ortholog(s) have S-adenosylmethionine-dependent methyltransferase activity, role in chromatin s
1.03295				548750000	0.401551	orf19.491	>orf19.491 orf19.491 CGDID:CAL0005862 COORDS:Ca21chrR_C_albicans_SC5314:917420-915399C, translated using codon table 12 (673 amino acids) Verified ORF;Endoplasmic reticulum (ER) protein-translocation complex subunit
1.03286				479110000	0.401911	orf19.4177	>orf19.4177 HIS5 CGDID:CAL0005821 COORDS:Ca21chr4_C_albicans_SC5314:111285-112454W, translated using codon table 12 (389 amino acids) Uncharacterized ORF;Putative histidinol-phosphate aminotransferase;Gcn4p-regulated;protein present in exponential and s
1.03356				197130000	0.401998	orf19.3898	>orf19.3898 orf19.3898 CGDID:CAL0002206 COORDS:Ca21chr5_C_albicans_SC5314:927296-926613C, translated using codon table 12 (227 amino acids) Uncharacterized ORF;Ortholog(s) have SNAP receptor activity, role in endocytosis, vesicle fusion and Golgi apparatu
1.03872				40906000	0.4021	orf19.4430	>orf19.4430 orf19.4430 CGDID:CAL0001806 COORDS:Ca21chr1_C_albicans_SC5314:1600458-1602098W, translated using codon table 12 (546 amino acids) Uncharacterized ORF;Ortholog(s) have ubiquitin binding activity, role in proteasomal ubiquitin-dependent protein
1.01616				24200000000	0.40231	orf19.979	>orf19.979 FAS1 CGDID:CAL0003782 COORDS:Ca21chr5_C_albicans_SC5314:29661-23548C, translated using codon table 12 (2037 amino acids) Verified ORF;Beta subunit of fatty-acid synthase;multifunctional enzyme;fluconazole-induced;Hap43p-induced;amphotericin
1.07931				8131500	0.402611	orf19.7023	>orf19.7023 orf19.7023 CGDID:CAL0001972 COORDS:Ca21chr7_C_albicans_SC5314:191255-190074C, translated using codon table 12 (393 amino acids) Uncharacterized ORF;Predicted ORF in Assemblies 19, 20 and 21;oxidative stress-induced via Cap1p
1.03261				428840000	0.402895	orf19.5198	>orf19.5198 NOP4 CGDID:CAL0002736 COORDS:Ca21chr1_C_albicans_SC5314:910860-908635C, translated using codon table 12 (741 amino acids) Verified ORF;Putative nucleolar protein;Hap43p-induced gene;mutation confers hypersensitivity to 5-fluorocytosine (5-FC
1.03257				359220000	0.403062	orf19.4993	>orf19.4993 SEC18 CGDID:CAL0000029 COORDS:Ca21chr1_C_albicans_SC5314:2981615-2984005W, translated using codon table 12 (796 amino acids) Verified ORF;Functional homolog of S. cerevisiae Sec18p, which acts in protein transport;conserved ATP binding site;
1.01602				2951600000	0.403068	orf19.1680	>orf19.1680 TFP1 CGDID:CAL0000146 COORDS:Ca21chr3_C_albicans_SC5314:355985-357915W, translated using codon table 12 (617 amino acids) Uncharacterized ORF;Subunit of vacuolar H+-ATPase;stationary phase enriched protein;sumoylation target
1.03253				681810000	0.403195	orf19.6293	>orf19.6293 EMP24 CGDID:CAL0000619 COORDS:Ca21chrR_C_albicans_SC5314:1649799-1650401W, translated using codon table 12 (200 amino acids) Verified ORF;COPII-coated vesicle component
1.01585				4310300000	0.403996	orf19.7057	>orf19.7057 orf19.7057 CGDID:CAL0002084 COORDS:Ca21chr7_C_albicans_SC5314:101629-103806W, translated using codon table 12 (725 amino acids) Uncharacterized ORF;Putative glutamine-tRNA ligase;stationary phase enriched protein
1.07815				26626000	0.404349	orf19.5977	>orf19.5977 CEM1 CGDID:CAL0003432 COORDS:Ca21chr3_C_albicans_SC5314:1091392-1092717W, translated using codon table 12 (441 amino acids) Uncharacterized ORF;Protein similar to S. cerevisiae Cem1p, an acyl carrier protein involved in fatty acid biosynthesis
1.03212				693600000	0.404814	orf19.882	>orf19.882 HSP78 CGDID:CAL0002893 COORDS:Ca21chr2_C_albicans_SC5314:709618-707180C, translated using codon table 12 (812 amino acids) Uncharacterized ORF;Putative heat-shock protein;transcriptionally regulated by macrophage response;transcription is reg
1.03241				142960000	0.405291	orf19.3355	>orf19.3355 ISN1 CGDID:CAL0004158 COORDS:Ca21chr1_C_albicans_SC5314:334662-336044W, translated using codon table 12 (460 amino acids) Uncharacterized ORF;Putative inosine 5-monophosphate 5-nucleotidase;fungal-specific (no human or murine homolog)
1.0324				234380000	0.405322	orf19.3312	>orf19.3312 orf19.3312 CGDID:CAL0004067 COORDS:Ca21chr1_C_albicans_SC5314:250112-251986W, translated using codon table 12 (624 amino acids) Uncharacterized ORF;Ortholog(s) have mitochondrion localization
1.03708				80785000	0.405437	orf19.6558	>orf19.6558 orf19.6558 CGDID:CAL0003224 COORDS:Ca21chr7_C_albicans_SC5314:358624-356177C, translated using codon table 12 (815 amino acids) Uncharacterized ORF;Has domain(s) with predicted zinc ion binding activity, role in ER to Golgi vesicle-mediated tr
1.07735				6551100	0.405546	orf19.6818	>orf19.6818 orf19.6818 CGDID:CAL0005664 COORDS:Ca21chr3_C_albicans_SC5314:1560673-1556561C, translated using codon table 12 (1370 amino acids) Uncharacterized ORF;Ortholog(s) have cytosol, mitochondrion localization
1.01527				8546200000	0.407076	orf19.4193.1	>orf19.4193.1 RPS13 CGDID:CAF0007004 COORDS:Ca21chr6_C_albicans_SC5314:115590-114731C, translated using codon table 12 (151 amino acids) Uncharacterized ORF;Putative ribosomal protein of the small subunit
1.07621				7304900	0.407267	orf19.6236	>orf19.6236 orf19.6236 CGDID:CAL0000479 COORDS:Ca21chr1_C_albicans_SC5314:1442123-1441494C, translated using codon table 12 (209 amino acids) Uncharacterized ORF;Ortholog(s) have rRNA binding activity, role in ribosomal small subunit biogenesis and 90S pr
1.03607				90205000	0.40749	orf19.4621	>orf19.4621 orf19.4621 CGDID:CAL0003635 COORDS:Ca21chr4_C_albicans_SC5314:345094-342977C, translated using codon table 12 (705 amino acids) Uncharacterized ORF;Ortholog(s) have cytoplasmic mRNA processing body localization
1.07592				21807000	0.407698	orf19.504	>orf19.504 orf19.504 CGDID:CAL0000047 COORDS:Ca21chrR_C_albicans_SC5314:936927-934597C, translated using codon table 12 (776 amino acids) Uncharacterized ORF;Ortholog(s) have ATP-dependent 3-5 DNA helicase activity, role in nucleosome mobilization and I
1.07577				16827000	0.407924	orf19.993	>orf19.993 orf19.993 CGDID:CAL0003844 COORDS:Ca21chr1_C_albicans_SC5314:2324072-2324596W, translated using codon table 12 (174 amino acids) Uncharacterized ORF;Ortholog of <i>C. parapsilosis CDC317</i> : CPAR2_502110, <i>Candida tenuis NRRL Y-1498</i> : C
1.03142				141400000	0.408149	orf19.3938	>orf19.3938 orf19.3938 CGDID:CAL0002946 COORDS:Ca21chr5_C_albicans_SC5314:989309-990097W, translated using codon table 12 (262 amino acids) Verified ORF;Putative mitochondrial ribosomal protein of the small subunit;mutation confers hypersensitivity to 5-
1.03138				186690000	0.40825	orf19.5828	>orf19.5828 orf19.5828 CGDID:CAL0002309 COORDS:Ca21chr2_C_albicans_SC5314:553526-555679W, translated using codon table 12 (717 amino acids) Uncharacterized ORF;Ortholog(s) have pre-mRNA branch point binding activity and role in generation of catalytic spl
1.01502				3060000000	0.408409	orf19.5130	>orf19.5130 PDI1 CGDID:CAL0002547 COORDS:Ca21chr7_C_albicans_SC5314:707309-705627C, translated using codon table 12 (560 amino acids) Verified ORF;Putative protein disulfide-isomerase;antigenic in human infection;soluble protein in hyphae;transcription
1.03102				141860000	0.40931	orf19.2319	>orf19.2319 orf19.2319 CGDID:CAL0000677 COORDS:Ca21chr1_C_albicans_SC5314:2419750-2421768W, translated using codon table 12 (672 amino acids) Uncharacterized ORF;Putative nucleolar protein with a predicted role in pre-rRNA processing;Hap43p-induced gene;
1.01484				829670000	0.40934	orf19.1235	>orf19.1235 HOM3 CGDID:CAL0002880 COORDS:Ca21chr4_C_albicans_SC5314:1210282-1211916W, translated using codon table 12 (544 amino acids) Uncharacterized ORF;Putative L-aspartate 4-P-transferase;fungal-specific (no human or murine homolog);regulated by Gc
1.03095				452820000	0.409406	orf19.2639.1	>orf19.2639.1 orf19.2639.1 CGDID:CAF0006959 COORDS:Ca21chr5_C_albicans_SC5314:767784-767257C, translated using codon table 12 (123 amino acids) Uncharacterized ORF;Ortholog(s) have RNA binding activity and role in maturation of SSU-rRNA, nuclear mRNA spli
1.01483				2951800000	0.409413	orf19.3504	>orf19.3504 RPL23A CGDID:CAL0005770 COORDS:Ca21chr6_C_albicans_SC5314:425969-425041C, translated using codon table 12 (137 amino acids) Uncharacterized ORF;Ribosomal protein;genes encoding cytoplasmic ribosomal subunits, translation factors, tRNA synthet
1.03086				181290000	0.409754	orf19.3348	>orf19.3348 orf19.3348 CGDID:CAL0004144 COORDS:Ca21chr1_C_albicans_SC5314:318944-319474W, translated using codon table 12 (176 amino acids) Uncharacterized ORF;Ortholog(s) have structural constituent of ribosome activity and mitochondrial large ribosomal
1.03082				241040000	0.409889	orf19.4029	>orf19.4029 orf19.4029 CGDID:CAL0004731 COORDS:Ca21chr5_C_albicans_SC5314:1155795-1157042W, translated using codon table 12 (415 amino acids) Uncharacterized ORF;Ortholog(s) have role in ribosomal large subunit assembly and cytosolic ribosome, nucleus loc
1.03077				539100000	0.410101	orf19.6287	>orf19.6287 AAT21 CGDID:CAL0000598 COORDS:Ca21chrR_C_albicans_SC5314:1655397-1656647W, translated using codon table 12 (416 amino acids) Uncharacterized ORF;Putative aspartate aminotransferase;higher protein amounts present in stationary phase;Gcn4p-reg
1.03448				37321000	0.410736	orf19.388	>orf19.388 CAF16 CGDID:CAL0004927 COORDS:Ca21chr1_C_albicans_SC5314:1854922-1855884W, translated using codon table 12 (320 amino acids) Uncharacterized ORF;ABC family protein, predicted not to be a transporter;caspofungin repressed;Hap43p-repressed
[truncated: 1,618 more rows]

## Sheet: Complete list of proteins-hypha
H/L ratio	B significant FDR=0.05	B significant FDR=0.01	B significant FDR=0.001	Intensity	B significance Benjamini-Hochbert	Protein.IDs	Fasta.headers
[truncated: 1,839 more rows]
