# Supplementary material for: Proteins that physically interact with the phosphatase Cdc14 in Candida albicans have diverse roles in the cell cycle
Source: Sci Rep. 2019 Apr 18;9:6258. doi: 10.1038/s41598-019-42530-1 (PMC6472416; doi:10.1038/s41598-019-42530-1)
Supplement: Supplementary file 2 — Dataset 2 [file 41598_2019_42530_MOESM2_ESM.xlsx]

## Sheet: Yeast hits not in lysate
	Protein IDs	Enriched in Yeast IP	Enriched in Hyphal IP	Fasta headers
2	orf19.1223	+		>orf19.1223 DBF2 CGDID:CAL0002833 COORDS:Ca21chr2_C_albicans_SC5314:1360034-1357902C, translated using codon table 12 (710 amino acids) Verified ORF;Essential serine/threonine protein kinase involved in mitotic spindle formation and cytokinesis;required
3	orf19.1357	+		>orf19.1357 FCY21 CGDID:CAL0003863 COORDS:Ca21chr2_C_albicans_SC5314:2034842-2036386W, translated using codon table 12 (514 amino acids) Verified ORF;High affinity, high capacity, hypoxanthine-adenine-guanine-cytosine/ H+ symporter;purine-cytosine permea
4	orf19.1428	+	+	>orf19.1428 DUO1 CGDID:CAL0004529 COORDS:Ca21chr4_C_albicans_SC5314:902219-902734W, translated using codon table 12 (171 amino acids) Uncharacterized ORF;Subunit of the Dam1 (DASH) complex, which acts in chromosome segregation by coupling kinetochores to
5	orf19.1446	+		>orf19.1446 CLB2 CGDID:CAL0004596 COORDS:Ca21chr2_C_albicans_SC5314:250508-249030C, translated using codon table 12 (492 amino acids) Verified ORF;B-type mitotic cyclin (cyclin-dependent protein kinase regulatory subunit);essential;required for wild-typ
6	orf19.1451	+		>orf19.1451 SRB9 CGDID:CAL0004613 COORDS:Ca21chr2_C_albicans_SC5314:260784-265781W, translated using codon table 12 (1665 amino acids) Verified ORF;Subunit of the RNA polymerase II mediator complex;transposon mutation affects filamentous growth;suppress
7	orf19.147	+		>orf19.147 YAK1 CGDID:CAL0003123 COORDS:Ca21chr2_C_albicans_SC5314:979332-976903C, translated using codon table 12 (809 amino acids) Verified ORF;Predicted serine-threonine protein kinase involved in hyphal growth regulation and biofilm formation;biofilm
8	orf19.1515	+	+	>orf19.1515 CHT4 CGDID:CAL0005409 COORDS:Ca21chr2_C_albicans_SC5314:389302-388136C, translated using codon table 12 (388 amino acids) Uncharacterized ORF;Chitinase;similar to S. cerevisiae sporulation-specific Cts2p;functionally complements A. gossypii
10	orf19.1598	+		>orf19.1598 ERG24 CGDID:CAL0005685 COORDS:Ca21chr2_C_albicans_SC5314:1914692-1913346C, translated using codon table 12 (448 amino acids) Verified ORF;C-14 sterol reductase, has a role in ergosterol biosynthesis;mutation confers increased sensitivity to d
14	orf19.1792	+		>orf19.1792 orf19.1792 CGDID:CAL0000995 COORDS:Ca21chr4_C_albicans_SC5314:1162041-1164398W, translated using codon table 12 (785 amino acids) Uncharacterized ORF;Ortholog(s) have ubiquitin-protein ligase activity
16	orf19.1941	+		>orf19.1941 NUF2 CGDID:CAL0002582 COORDS:Ca21chr5_C_albicans_SC5314:290129-288720C, translated using codon table 12 (469 amino acids) Verified ORF;Kinetochore component;amount of Nuf2p and Mtw1p protein detected at each centromere is consistent with a si
17	orf19.2084	+	+	>orf19.2084 CDH1 CGDID:CAL0004530 COORDS:Ca21chr2_C_albicans_SC5314:68137-66344C, translated using codon table 12 (597 amino acids) Verified ORF;Protein involved in regulation of mitosis, similar to S. cerevisiae Cdh1p, which is an APC/C component;transc
18	orf19.2369	+		>orf19.2369 orf19.2369 CGDID:CAL0000773 COORDS:Ca21chrR_C_albicans_SC5314:1490389-1491879W, translated using codon table 12 (496 amino acids) Uncharacterized ORF;Ortholog(s) have ATP binding, DNA replication origin binding activity
19	orf19.2381	+	+	>orf19.2381 orf19.2381 CGDID:CAL0000806 COORDS:Ca21chrR_C_albicans_SC5314:756742-757680W, translated using codon table 12 (312 amino acids) Uncharacterized ORF;Predicted ORF in Assemblies 19, 20 and 21;possibly an essential gene, disruptants not obtained
20	orf19.2389	+		>orf19.2389 orf19.2389 CGDID:CAL0000817 COORDS:Ca21chrR_C_albicans_SC5314:746253-745189C, translated using codon table 12 (354 amino acids) Uncharacterized ORF;Ortholog(s) have DNA replication origin binding, DNA strand annealing activity
22	orf19.2400	+		>orf19.2400 orf19.2400 CGDID:CAL0001442 COORDS:Ca21chrR_C_albicans_SC5314:724234-726351W, translated using codon table 12 (705 amino acids) Uncharacterized ORF;Ortholog(s) have role in maturation of SSU-rRNA, nuclear mRNA splicing, via spliceosome, positi
24	orf19.267	+	+	>orf19.267 orf19.267 CGDID:CAL0004042 COORDS:Ca21chr3_C_albicans_SC5314:599389-595748C, translated using codon table 12 (1213 amino acids) Verified ORF;Protein required for normal filamentous growth;mRNA binds to She3p
26	orf19.2684	+	+	>orf19.2684 orf19.2684 CGDID:CAL0003531 COORDS:Ca21chr4_C_albicans_SC5314:641845-644280W, translated using codon table 12 (811 amino acids) Uncharacterized ORF;Ortholog of <i>C. parapsilosis CDC317</i> : CPAR2_401570, <i>Debaryomyces hansenii CBS767</i> :
28	orf19.2826	+	+	>orf19.2826 orf19.2826 CGDID:CAL0005085 COORDS:Ca21chrR_C_albicans_SC5314:614526-613126C, translated using codon table 12 (466 amino acids) Uncharacterized ORF;Ortholog of <i>C. parapsilosis CDC317</i> : CPAR2_801140, <i>Candida tenuis NRRL Y-1498</i> : C
29	orf19.2827	+	+	>orf19.2827 orf19.2827 CGDID:CAL0005087 COORDS:Ca21chrR_C_albicans_SC5314:615887-618253W, translated using codon table 12 (788 amino acids) Uncharacterized ORF;Ortholog(s) have structural constituent of cytoskeleton activity
31	orf19.3000	+	+	>orf19.3000 ORC1 CGDID:CAL0001320 COORDS:Ca21chr1_C_albicans_SC5314:641622-639205C, translated using codon table 12 (805 amino acids) Uncharacterized ORF;Putative origin recognition complex large subunit;essential for viability;similar to S. cerevisiae
33	orf19.3091	+		>orf19.3091 orf19.3091 CGDID:CAL0001522 COORDS:Ca21chr4_C_albicans_SC5314:1578626-1582930W, translated using codon table 12 (1434 amino acids) Uncharacterized ORF;Predicted ORF in Assemblies 19, 20 and 21;downregulated during core stress response
35	orf19.3231	+		>orf19.3231 CDC27 CGDID:CAL0003279 COORDS:Ca21chrR_C_albicans_SC5314:290913-288286C, translated using codon table 12 (875 amino acids) Uncharacterized ORF;Putative ubiquitin-protein ligase;periodic mRNA expression, peak at cell-cycle S/G2 phase
37	orf19.3252	+		>orf19.3252 DAL81 CGDID:CAL0003338 COORDS:Ca21chrR_C_albicans_SC5314:231768-234404W, translated using codon table 12 (878 amino acids) Verified ORF;Predicted zinc-finger transcription factor with similarity to S. cerevisiae Dal81p, which is involved in th
38	orf19.3289	+		>orf19.3289 orf19.3289 CGDID:CAL0003421 COORDS:Ca21chr1_C_albicans_SC5314:203629-202538C, translated using codon table 12 (363 amino acids) Uncharacterized ORF;Phosphorylated protein of unknown function
39	orf19.3296	+		>orf19.3296 orf19.3296 CGDID:CAL0003445 COORDS:Ca21chr1_C_albicans_SC5314:210881-212386W, translated using codon table 12 (501 amino acids) Uncharacterized ORF;Ortholog of <i>C. parapsilosis CDC317</i> : CPAR2_110130, <i>Candida tenuis NRRL Y-1498</i> : C
41	orf19.3356	+		>orf19.3356 ESP1 CGDID:CAL0004160 COORDS:Ca21chr1_C_albicans_SC5314:341515-336719C, translated using codon table 12 (1598 amino acids) Verified ORF;Putative caspase-like cysteine protease;mutation confers increased sensitivity to nocodazole;periodic mRN
42	orf19.3362;orf19.2671	+		>orf19.3362 orf19.3362 CGDID:CAL0004170 COORDS:Ca21chr4_C_albicans_SC5314:704120-702777C, translated using codon table 12 (447 amino acids) Uncharacterized ORF;Has domain(s) with predicted flavin adenine dinucleotide binding, oxidoreductase activity and r
46	orf19.3535	+		>orf19.3535 orf19.3535 CGDID:CAL0005881 COORDS:Ca21chr2_C_albicans_SC5314:1045705-1044839C, translated using codon table 12 (288 amino acids) Uncharacterized ORF;Ortholog(s) have cellular bud neck, fungal-type vacuole localization
47	orf19.3551	+	+	>orf19.3551 DAD2 CGDID:CAL0005920 COORDS:Ca21chr2_C_albicans_SC5314:1072240-1072617W, translated using codon table 12 (125 amino acids) Verified ORF;Essential subunit of the Dam1 (DASH) complex, which acts in chromosome segregation by coupling kinetochore
48	orf19.3561	+	+	>orf19.3561 CDC7 CGDID:CAL0005945 COORDS:Ca21chr2_C_albicans_SC5314:1093604-1095574W, translated using codon table 12 (656 amino acids) Uncharacterized ORF;Putative kinase;cell-cycle regulated periodic mRNA expression;S. cerevisiae ortholog is not cell-
49	orf19.3684	+		>orf19.3684 orf19.3684 CGDID:CAL0000467 COORDS:Ca21chr1_C_albicans_SC5314:478218-477340C, translated using codon table 12 (292 amino acids) Uncharacterized ORF;Has domain(s) with predicted nucleotide binding activity and role in oxidation-reduction proces
52	orf19.3788	+	+	>orf19.3788 SPC34 CGDID:CAL0001301 COORDS:Ca21chr4_C_albicans_SC5314:1056829-1056086C, translated using codon table 12 (247 amino acids) Uncharacterized ORF;Subunit of the Dam1 (DASH) complex, which acts in chromosome segregation by coupling kinetochores
53	orf19.3809	+		>orf19.3809 BAS1 CGDID:CAL0001915 COORDS:Ca21chr4_C_albicans_SC5314:1013121-1015337W, translated using codon table 12 (738 amino acids) Verified ORF;Putative transcription factor with Myb-like DNA-binding motif;similar to S. cerevisiae Bas1p, which is a
54	orf19.3823	+		>orf19.3823 ZDS1 CGDID:CAL0001987 COORDS:Ca21chr4_C_albicans_SC5314:982303-987240W, translated using codon table 12 (1645 amino acids) Uncharacterized ORF;Nonessential protein;similar to S. cerevisiae Zds1p
55	orf19.384	+		>orf19.384 orf19.384 CGDID:CAL0004918 COORDS:Ca21chr1_C_albicans_SC5314:1845892-1844216C, translated using codon table 12 (558 amino acids) Uncharacterized ORF;Ortholog(s) have Golgi apparatus, cytosol, nucleus localization
57	orf19.3871	+		>orf19.3871 DAD3 CGDID:CAL0002149 COORDS:Ca21chrR_C_albicans_SC5314:1321396-1320980C, translated using codon table 12 (138 amino acids) Uncharacterized ORF;Subunit of the Dam1 (DASH) complex, which acts in chromosome segregation by coupling kinetochores t
58	orf19.3954	+		>orf19.3954 orf19.3954 CGDID:CAL0003011 COORDS:Ca21chr5_C_albicans_SC5314:1015820-1019032W, translated using codon table 12 (1070 amino acids) Verified ORF;Ortholog(s) have phosphatidylserine decarboxylase activity and role in phosphatidylcholine biosynth
59	orf19.4013	+		>orf19.4013 orf19.4013 CGDID:CAL0004678 COORDS:Ca21chr5_C_albicans_SC5314:1141603-1140299C, translated using codon table 12 (434 amino acids) Uncharacterized ORF;Putative protein of unknown function;Hap43p-repressed gene;<I>S. cerevisiae</I> ortholog YH
62	orf19.4101	+		>orf19.4101 orf19.4101 CGDID:CAL0005549 COORDS:Ca21chr2_C_albicans_SC5314:1255179-1255487W, translated using codon table 12 (102 amino acids) Uncharacterized ORF;Ortholog of <i>C. parapsilosis CDC317</i> : CPAR2_104840, <i>Candida tenuis NRRL Y-1498</i> :
63	orf19.4192	+	+	>orf19.4192 CDC14 CGDID:CAL0005886 COORDS:Ca21chr6_C_albicans_SC5314:116893-118596W, translated using codon table 12 (542 amino acids) Verified ORF;Protein involved in exit from mitosis and morphogenesis;ortholog of S. cerevisiae Cdc14p, which is a dual-
64	orf19.4208	+	+	>orf19.4208 RAD52 CGDID:CAL0000064 COORDS:Ca21chr6_C_albicans_SC5314:97421-95727C, translated using codon table 12 (564 amino acids) Verified ORF;Required for homologous DNA recombination, repair of UV- or MMS-damaged DNA, telomere length, UV-induced LOH;
65	orf19.4221	+	+	>orf19.4221 ORC4 CGDID:CAL0000132 COORDS:Ca21chr5_C_albicans_SC5314:479720-478026C, translated using codon table 12 (564 amino acids) Uncharacterized ORF;Phosphorylated protein similar to S. cerevisiae Orc4p;transcription is induced in response to alpha
66	orf19.427	+	+	>orf19.427 orf19.427 CGDID:CAL0005619 COORDS:Ca21chr1_C_albicans_SC5314:1133437-1128440C, translated using codon table 12 (1665 amino acids) Uncharacterized ORF;Ortholog(s) have telomeric DNA binding activity and role in chromatin silencing at silent mati
67	orf19.4275	+	+	>orf19.4275 RAD9 CGDID:CAL0000322 COORDS:Ca21chr5_C_albicans_SC5314:586193-582669C, translated using codon table 12 (1174 amino acids) Verified ORF;Protein involved in regulation of DNA-damage-induced filamentous growth;putative component of DNA damage c
69	orf19.4435	+	+	>orf19.4435 orf19.4435 CGDID:CAL0001812 COORDS:Ca21chr1_C_albicans_SC5314:1586011-1589922W, translated using codon table 12 (1303 amino acids) Uncharacterized ORF;Ortholog(s) have structural constituent of cytoskeleton activity, role in microtubule nuclea
70	orf19.4473	+	+	>orf19.4473 SPC19 CGDID:CAL0001953 COORDS:Ca21chr1_C_albicans_SC5314:838307-838834W, translated using codon table 12 (175 amino acids) Uncharacterized ORF;Essential subunit of the Dam1 (DASH) complex, which acts in chromosome segregation by coupling kinet
71	orf19.4675	+	+	>orf19.4675 ASK1 CGDID:CAL0003789 COORDS:Ca21chr4_C_albicans_SC5314:231171-232955W, translated using codon table 12 (594 amino acids) Uncharacterized ORF;Essential subunit of the Dam1 (DASH) complex, which acts in chromosome segregation by coupling kineto
74	orf19.4837	+	+	>orf19.4837 DAM1 CGDID:CAL0005362 COORDS:Ca21chr1_C_albicans_SC5314:2138563-2139396W, translated using codon table 12 (277 amino acids) Verified ORF;Essential subunit of the Dam1 (DASH) complex, which acts in chromosome segregation by coupling kinetochore
75	orf19.4988	+	+	>orf19.4988 orf19.4988 CGDID:CAL0000017 COORDS:Ca21chr1_C_albicans_SC5314:2970121-2971638W, translated using codon table 12 (505 amino acids) Uncharacterized ORF;Predicted ORF in Assemblies 19, 20 and 21;greater mRNA abundance observed in a cyr1 homozygo
76	orf19.5166	+	+	>orf19.5166 DBF4 CGDID:CAL0002629 COORDS:Ca21chr7_C_albicans_SC5314:640747-639227C, translated using codon table 12 (506 amino acids) Uncharacterized ORF;Putative Cdc7p-Dbf4p kinase complex regulatory subunit;Hap43p-induced gene;macrophage/pseudohyphal-
77	orf19.520	+		>orf19.520 orf19.520 CGDID:CAL0000113 COORDS:Ca21chrR_C_albicans_SC5314:961925-963124W, translated using codon table 12 (399 amino acids) Uncharacterized ORF;Ortholog of <i>C. parapsilosis CDC317</i> : CPAR2_205200, <i>Candida tenuis NRRL Y-1498</i> : CAN
79	orf19.5276	+		>orf19.5276 orf19.5276 CGDID:CAL0003621 COORDS:Ca21chr1_C_albicans_SC5314:2605879-2607126W, translated using codon table 12 (415 amino acids) Uncharacterized ORF;Putative nuclear pore-associated protein;Hap43p-induced gene;induced upon low-level peroxid
80	orf19.5358	+	+	>orf19.5358 orf19.5358 CGDID:CAL0004335 COORDS:Ca21chr2_C_albicans_SC5314:2213298-2211232C, translated using codon table 12 (688 amino acids) Uncharacterized ORF;Phosphorylated protein of unknown function
81	orf19.5389	+	+	>orf19.5389 FKH2 CGDID:CAL0004415 COORDS:Ca21chr3_C_albicans_SC5314:115299-113160C, translated using codon table 12 (687 amino acids) Verified ORF;Forkhead transcription factor;morphogenesis regulator;required for wild-type hyphal transcription, cell se
83	orf19.5491	+	+	>orf19.5491 orf19.5491 CGDID:CAL0005356 COORDS:Ca21chr2_C_albicans_SC5314:1278420-1277233C, translated using codon table 12 (395 amino acids) Uncharacterized ORF;Ortholog of <i>C. parapsilosis CDC317</i> : CPAR2_104720, <i>Candida tenuis NRRL Y-1498</i> :
84	orf19.5518	+	+	>orf19.5518 orf19.5518 CGDID:CAL0006096 COORDS:Ca21chr6_C_albicans_SC5314:516545-515805C, translated using codon table 12 (246 amino acids) Uncharacterized ORF;Ortholog of <i>C. parapsilosis CDC317</i> : CPAR2_601850, <i>Candida tenuis NRRL Y-1498</i> : C
85	orf19.557	+		>orf19.557 orf19.557 CGDID:CAL0000246 COORDS:Ca21chrR_C_albicans_SC5314:1125729-1126754W, translated using codon table 12 (341 amino acids) Uncharacterized ORF;Hap43p-repressed gene;planktonic growth-induced gene
87	orf19.580	+		>orf19.580 orf19.580 CGDID:CAL0000326 COORDS:Ca21chr5_C_albicans_SC5314:185724-184672C, translated using codon table 12 (350 amino acids) Uncharacterized ORF;Protein not essential for viability
89	orf19.6010	+	+	>orf19.6010 CDC5 CGDID:CAL0005042 COORDS:Ca21chr1_C_albicans_SC5314:193411-191450C, translated using codon table 12 (653 amino acids) Verified ORF;Polo-like kinase;member of conserved Mcm1p regulon;depletion causes defects in spindle elongation and Cdc3
92	orf19.6030	+		>orf19.6030 orf19.6030 CGDID:CAL0005097 COORDS:Ca21chr1_C_albicans_SC5314:134256-134915W, translated using codon table 12 (219 amino acids) Uncharacterized ORF;Predicted ORF in Assemblies 19, 20 and 21;transcription detected in high-resolution tiling arr
93	orf19.6049	+	+	>orf19.6049 orf19.6049 CGDID:CAL0005134 COORDS:Ca21chr1_C_albicans_SC5314:93695-91311C, translated using codon table 12 (794 amino acids) Uncharacterized ORF;Ortholog(s) have protein kinase activator activity, role in protein phosphorylation, regulation o
94	orf19.6124	+	+	>orf19.6124 ACE2 CGDID:CAL0005982 COORDS:Ca21chrR_C_albicans_SC5314:1611848-1614199W, translated using codon table 12 (783 amino acids) Verified ORF;Transcription factor involved in regulation of morphogenesis, cell separation, adherence, biofilm formatio
95	orf19.6155	+		>orf19.6155 orf19.6155 CGDID:CAL0006047 COORDS:Ca21chr3_C_albicans_SC5314:167647-165335C, translated using codon table 12 (770 amino acids) Uncharacterized ORF;Ortholog(s) have DNA ligase (ATP) activity
97	orf19.6254	+		>orf19.6254 ANT1 CGDID:CAL0000514 COORDS:Ca21chr1_C_albicans_SC5314:1407331-1408368W, translated using codon table 12 (345 amino acids) Uncharacterized ORF;Ortholog(s) have adenine nucleotide transmembrane transporter activity, role in ATP transport, fatt
99	orf19.6291	+		>orf19.6291 orf19.6291 CGDID:CAL0000615 COORDS:Ca21chrR_C_albicans_SC5314:1651031-1654324W, translated using codon table 12 (1097 amino acids) Uncharacterized ORF;Ortholog(s) have DNA binding, DNA-dependent ATPase activity, chromatin binding, protein homo
104	orf19.6443	+		>orf19.6443 orf19.6443 CGDID:CAL0002210 COORDS:Ca21chrR_C_albicans_SC5314:1872540-1871737C, translated using codon table 12 (267 amino acids) Uncharacterized ORF;Has domain(s) with predicted catalytic activity and role in metabolic process
106	orf19.652	+	+	>orf19.652 orf19.652 CGDID:CAL0001028 COORDS:Ca21chrR_C_albicans_SC5314:1082058-1084112W, translated using codon table 12 (684 amino acids) Uncharacterized ORF;Ortholog(s) have crossover junction endodeoxyribonuclease activity, role in DNA repair and cyto
107	orf19.6536	+		>orf19.6536 IQG1 CGDID:CAL0003156 COORDS:Ca21chr7_C_albicans_SC5314:394417-399360W, translated using codon table 12 (1647 amino acids) Verified ORF;Component of actomyosin ring at bud neck;cell-cycle regulated serine phosphorylation at CDK sites regulate
108	orf19.658	+	+	>orf19.658 GIN1 CGDID:CAL0001036 COORDS:Ca21chr1_C_albicans_SC5314:2511975-2508271C, translated using codon table 12 (1234 amino acids) Verified ORF;Protein involved in regulation of DNA-damage-induced filamentous growth;putative component of DNA replica
109	orf19.6583	+	+	>orf19.6583 orf19.6583 CGDID:CAL0003304 COORDS:Ca21chr7_C_albicans_SC5314:308850-305830C, translated using codon table 12 (1006 amino acids) Uncharacterized ORF;Predicted ORF in Assemblies 19, 20 and 21;transcription is induced in response to alpha phero
115	orf19.6942	+	+	>orf19.6942 ORC3 CGDID:CAL0000266 COORDS:Ca21chr3_C_albicans_SC5314:789657-787609C, translated using codon table 12 (682 amino acids) Verified ORF;Protein similar to S. cerevisiae Orc3p, which is a component of the origin recognition complex involved in D
116	orf19.7060	+		>orf19.7060 orf19.7060 CGDID:CAL0002105 COORDS:Ca21chr7_C_albicans_SC5314:96928-97902W, translated using codon table 12 (324 amino acids) Uncharacterized ORF;Ortholog of <i>C. parapsilosis CDC317</i> : CPAR2_301080, <i>Debaryomyces hansenii CBS767</i> : D
120	orf19.7406	+		>orf19.7406 orf19.7406 CGDID:CAL0005427 COORDS:Ca21chr3_C_albicans_SC5314:1428029-1425969C, translated using codon table 12 (686 amino acids) Uncharacterized ORF;Ortholog of <i>C. parapsilosis CDC317</i> : CPAR2_404490, <i>Candida tenuis NRRL Y-1498</i> :
125	orf19.926	+		>orf19.926 EXO1 CGDID:CAL0003631 COORDS:Ca21chr5_C_albicans_SC5314:144424-142325C, translated using codon table 12 (699 amino acids) Uncharacterized ORF;Putative exodeoxyribonuclease;cell-cycle regulated periodic mRNA expression

## Sheet: Hyphal hits not in lysate
Protein IDs	Enriched in Yeast IP	Enriched in Hyphal IP	Fasta headers
orf19.1133		+	>orf19.1133 MSB1 CGDID:CAL0001961 COORDS:Ca21chr1_C_albicans_SC5314:771005-767142C, translated using codon table 12 (1287 amino acids) Verified ORF;Putative regulator of transcription;expression in S. cerevisiae flo8 and flo11 mutants suggests a role in
orf19.1428	+	+	>orf19.1428 DUO1 CGDID:CAL0004529 COORDS:Ca21chr4_C_albicans_SC5314:902219-902734W, translated using codon table 12 (171 amino acids) Uncharacterized ORF;Subunit of the Dam1 (DASH) complex, which acts in chromosome segregation by coupling kinetochores to
orf19.1515	+	+	>orf19.1515 CHT4 CGDID:CAL0005409 COORDS:Ca21chr2_C_albicans_SC5314:389302-388136C, translated using codon table 12 (388 amino acids) Uncharacterized ORF;Chitinase;similar to S. cerevisiae sporulation-specific Cts2p;functionally complements A. gossypii
orf19.2084	+	+	>orf19.2084 CDH1 CGDID:CAL0004530 COORDS:Ca21chr2_C_albicans_SC5314:68137-66344C, translated using codon table 12 (597 amino acids) Verified ORF;Protein involved in regulation of mitosis, similar to S. cerevisiae Cdh1p, which is an APC/C component;transc
orf19.2381	+	+	>orf19.2381 orf19.2381 CGDID:CAL0000806 COORDS:Ca21chrR_C_albicans_SC5314:756742-757680W, translated using codon table 12 (312 amino acids) Uncharacterized ORF;Predicted ORF in Assemblies 19, 20 and 21;possibly an essential gene, disruptants not obtained
orf19.267	+	+	>orf19.267 orf19.267 CGDID:CAL0004042 COORDS:Ca21chr3_C_albicans_SC5314:599389-595748C, translated using codon table 12 (1213 amino acids) Verified ORF;Protein required for normal filamentous growth;mRNA binds to She3p
orf19.2684	+	+	>orf19.2684 orf19.2684 CGDID:CAL0003531 COORDS:Ca21chr4_C_albicans_SC5314:641845-644280W, translated using codon table 12 (811 amino acids) Uncharacterized ORF;Ortholog of <i>C. parapsilosis CDC317</i> : CPAR2_401570, <i>Debaryomyces hansenii CBS767</i> :
orf19.2826	+	+	>orf19.2826 orf19.2826 CGDID:CAL0005085 COORDS:Ca21chrR_C_albicans_SC5314:614526-613126C, translated using codon table 12 (466 amino acids) Uncharacterized ORF;Ortholog of <i>C. parapsilosis CDC317</i> : CPAR2_801140, <i>Candida tenuis NRRL Y-1498</i> : C
orf19.2827	+	+	>orf19.2827 orf19.2827 CGDID:CAL0005087 COORDS:Ca21chrR_C_albicans_SC5314:615887-618253W, translated using codon table 12 (788 amino acids) Uncharacterized ORF;Ortholog(s) have structural constituent of cytoskeleton activity
orf19.3000	+	+	>orf19.3000 ORC1 CGDID:CAL0001320 COORDS:Ca21chr1_C_albicans_SC5314:641622-639205C, translated using codon table 12 (805 amino acids) Uncharacterized ORF;Putative origin recognition complex large subunit;essential for viability;similar to S. cerevisiae
orf19.3474		+	>orf19.3474 IPL1 CGDID:CAL0005060 COORDS:Ca21chr6_C_albicans_SC5314:482963-481371C, translated using codon table 12 (530 amino acids) Uncharacterized ORF;Putative Aurora kinase;Hap43p-induced gene;induced during planktonic growth;possibly an essential
orf19.3551	+	+	>orf19.3551 DAD2 CGDID:CAL0005920 COORDS:Ca21chr2_C_albicans_SC5314:1072240-1072617W, translated using codon table 12 (125 amino acids) Verified ORF;Essential subunit of the Dam1 (DASH) complex, which acts in chromosome segregation by coupling kinetochore
orf19.3561	+	+	>orf19.3561 CDC7 CGDID:CAL0005945 COORDS:Ca21chr2_C_albicans_SC5314:1093604-1095574W, translated using codon table 12 (656 amino acids) Uncharacterized ORF;Putative kinase;cell-cycle regulated periodic mRNA expression;S. cerevisiae ortholog is not cell-
orf19.3788	+	+	>orf19.3788 SPC34 CGDID:CAL0001301 COORDS:Ca21chr4_C_albicans_SC5314:1056829-1056086C, translated using codon table 12 (247 amino acids) Uncharacterized ORF;Subunit of the Dam1 (DASH) complex, which acts in chromosome segregation by coupling kinetochores
orf19.4192	+	+	>orf19.4192 CDC14 CGDID:CAL0005886 COORDS:Ca21chr6_C_albicans_SC5314:116893-118596W, translated using codon table 12 (542 amino acids) Verified ORF;Protein involved in exit from mitosis and morphogenesis;ortholog of S. cerevisiae Cdc14p, which is a dual-
orf19.4208	+	+	>orf19.4208 RAD52 CGDID:CAL0000064 COORDS:Ca21chr6_C_albicans_SC5314:97421-95727C, translated using codon table 12 (564 amino acids) Verified ORF;Required for homologous DNA recombination, repair of UV- or MMS-damaged DNA, telomere length, UV-induced LOH;
orf19.4221	+	+	>orf19.4221 ORC4 CGDID:CAL0000132 COORDS:Ca21chr5_C_albicans_SC5314:479720-478026C, translated using codon table 12 (564 amino acids) Uncharacterized ORF;Phosphorylated protein similar to S. cerevisiae Orc4p;transcription is induced in response to alpha
orf19.427	+	+	>orf19.427 orf19.427 CGDID:CAL0005619 COORDS:Ca21chr1_C_albicans_SC5314:1133437-1128440C, translated using codon table 12 (1665 amino acids) Uncharacterized ORF;Ortholog(s) have telomeric DNA binding activity and role in chromatin silencing at silent mati
orf19.4275	+	+	>orf19.4275 RAD9 CGDID:CAL0000322 COORDS:Ca21chr5_C_albicans_SC5314:586193-582669C, translated using codon table 12 (1174 amino acids) Verified ORF;Protein involved in regulation of DNA-damage-induced filamentous growth;putative component of DNA damage c
orf19.4435	+	+	>orf19.4435 orf19.4435 CGDID:CAL0001812 COORDS:Ca21chr1_C_albicans_SC5314:1586011-1589922W, translated using codon table 12 (1303 amino acids) Uncharacterized ORF;Ortholog(s) have structural constituent of cytoskeleton activity, role in microtubule nuclea
orf19.4473	+	+	>orf19.4473 SPC19 CGDID:CAL0001953 COORDS:Ca21chr1_C_albicans_SC5314:838307-838834W, translated using codon table 12 (175 amino acids) Uncharacterized ORF;Essential subunit of the Dam1 (DASH) complex, which acts in chromosome segregation by coupling kinet
orf19.4675	+	+	>orf19.4675 ASK1 CGDID:CAL0003789 COORDS:Ca21chr4_C_albicans_SC5314:231171-232955W, translated using codon table 12 (594 amino acids) Uncharacterized ORF;Essential subunit of the Dam1 (DASH) complex, which acts in chromosome segregation by coupling kineto
orf19.4837	+	+	>orf19.4837 DAM1 CGDID:CAL0005362 COORDS:Ca21chr1_C_albicans_SC5314:2138563-2139396W, translated using codon table 12 (277 amino acids) Verified ORF;Essential subunit of the Dam1 (DASH) complex, which acts in chromosome segregation by coupling kinetochore
orf19.4988	+	+	>orf19.4988 orf19.4988 CGDID:CAL0000017 COORDS:Ca21chr1_C_albicans_SC5314:2970121-2971638W, translated using codon table 12 (505 amino acids) Uncharacterized ORF;Predicted ORF in Assemblies 19, 20 and 21;greater mRNA abundance observed in a cyr1 homozygo
orf19.5166	+	+	>orf19.5166 DBF4 CGDID:CAL0002629 COORDS:Ca21chr7_C_albicans_SC5314:640747-639227C, translated using codon table 12 (506 amino acids) Uncharacterized ORF;Putative Cdc7p-Dbf4p kinase complex regulatory subunit;Hap43p-induced gene;macrophage/pseudohyphal-
orf19.5358	+	+	>orf19.5358 orf19.5358 CGDID:CAL0004335 COORDS:Ca21chr2_C_albicans_SC5314:2213298-2211232C, translated using codon table 12 (688 amino acids) Uncharacterized ORF;Phosphorylated protein of unknown function
orf19.5389	+	+	>orf19.5389 FKH2 CGDID:CAL0004415 COORDS:Ca21chr3_C_albicans_SC5314:115299-113160C, translated using codon table 12 (687 amino acids) Verified ORF;Forkhead transcription factor;morphogenesis regulator;required for wild-type hyphal transcription, cell se
orf19.5491	+	+	>orf19.5491 orf19.5491 CGDID:CAL0005356 COORDS:Ca21chr2_C_albicans_SC5314:1278420-1277233C, translated using codon table 12 (395 amino acids) Uncharacterized ORF;Ortholog of <i>C. parapsilosis CDC317</i> : CPAR2_104720, <i>Candida tenuis NRRL Y-1498</i> :
orf19.5518	+	+	>orf19.5518 orf19.5518 CGDID:CAL0006096 COORDS:Ca21chr6_C_albicans_SC5314:516545-515805C, translated using codon table 12 (246 amino acids) Uncharacterized ORF;Ortholog of <i>C. parapsilosis CDC317</i> : CPAR2_601850, <i>Candida tenuis NRRL Y-1498</i> : C
orf19.5614		+	>orf19.5614 orf19.5614 CGDID:CAL0000560 COORDS:Ca21chr6_C_albicans_SC5314:685914-686771W, translated using codon table 12 (285 amino acids) Uncharacterized ORF;Putative ribonuclease H1;biofilm-induced gene;possibly an essential gene, disruptants not obt
orf19.6010	+	+	>orf19.6010 CDC5 CGDID:CAL0005042 COORDS:Ca21chr1_C_albicans_SC5314:193411-191450C, translated using codon table 12 (653 amino acids) Verified ORF;Polo-like kinase;member of conserved Mcm1p regulon;depletion causes defects in spindle elongation and Cdc3
orf19.6049	+	+	>orf19.6049 orf19.6049 CGDID:CAL0005134 COORDS:Ca21chr1_C_albicans_SC5314:93695-91311C, translated using codon table 12 (794 amino acids) Uncharacterized ORF;Ortholog(s) have protein kinase activator activity, role in protein phosphorylation, regulation o
orf19.6124	+	+	>orf19.6124 ACE2 CGDID:CAL0005982 COORDS:Ca21chrR_C_albicans_SC5314:1611848-1614199W, translated using codon table 12 (783 amino acids) Verified ORF;Transcription factor involved in regulation of morphogenesis, cell separation, adherence, biofilm formatio
orf19.6408		+	>orf19.6408 orf19.6408 CGDID:CAL0002114 COORDS:Ca21chrR_C_albicans_SC5314:1816749-1818368W, translated using codon table 12 (539 amino acids) Uncharacterized ORF;Hap43p-repressed gene;induced during planktonic growth
orf19.643		+	>orf19.643 orf19.643 CGDID:CAL0001006 COORDS:Ca21chrR_C_albicans_SC5314:1105224-1109060W, translated using codon table 12 (1278 amino acids) Uncharacterized ORF;Ortholog(s) have role in apoptotic process, mitotic spindle elongation, sister chromatid biori
orf19.652	+	+	>orf19.652 orf19.652 CGDID:CAL0001028 COORDS:Ca21chrR_C_albicans_SC5314:1082058-1084112W, translated using codon table 12 (684 amino acids) Uncharacterized ORF;Ortholog(s) have crossover junction endodeoxyribonuclease activity, role in DNA repair and cyto
orf19.658	+	+	>orf19.658 GIN1 CGDID:CAL0001036 COORDS:Ca21chr1_C_albicans_SC5314:2511975-2508271C, translated using codon table 12 (1234 amino acids) Verified ORF;Protein involved in regulation of DNA-damage-induced filamentous growth;putative component of DNA replica
orf19.6583	+	+	>orf19.6583 orf19.6583 CGDID:CAL0003304 COORDS:Ca21chr7_C_albicans_SC5314:308850-305830C, translated using codon table 12 (1006 amino acids) Uncharacterized ORF;Predicted ORF in Assemblies 19, 20 and 21;transcription is induced in response to alpha phero
orf19.6942	+	+	>orf19.6942 ORC3 CGDID:CAL0000266 COORDS:Ca21chr3_C_albicans_SC5314:789657-787609C, translated using codon table 12 (682 amino acids) Verified ORF;Protein similar to S. cerevisiae Orc3p, which is a component of the origin recognition complex involved in D
