# Supplementary material for: Proteins that physically interact with the phosphatase Cdc14 in Candida albicans have diverse roles in the cell cycle
Source: Sci Rep. 2019 Apr 18;9:6258. doi: 10.1038/s41598-019-42530-1 (PMC6472416; doi:10.1038/s41598-019-42530-1)
Supplement: Supplementary file 3 — Dataset 3 [file 41598_2019_42530_MOESM3_ESM.xlsx]

## Sheet: goFinderResult.19645
GOID	GO_term	Cluster frequency	Background frequency	Corrected P-value	False discovery rate	Gene(s) annotated to the term	Directly Annotated GOID List
22402	cell cycle process	43 out of 125 genes, 34.4%	470 out of 6473 background genes, 7.3%	3.62e-16	0	SIN3:CDC5:C1_01000C_A:ESP1:ORC1:SPC19:C1_06760C_A:DAM1:GIN1:C1_11910W_A:C1_13560W_A:CDH1:CLB2:DAD2:CDC7:DBF2:C2_10760C_A:FKH2:C3_00830C_A:ORC3:ASK1:DUO1:SPC34:EXO1:NUF2:ORC4:RAD9:RAD52:CDC14:IPL1:IQG1:DBF4:CDC27:CR_02680W_A:MLC1:CR_03340C_A:CR_05100W_A:CDC28:DAD3:CR_06960W_A:ACE2:CR_09520C_A:CSM1	6974:51038:1905786:10947:60258:6279:1902426:737:45944:730:90055:30447:31939:72429:6281:48478:31333:32463:1902542:1402:722:32955:71479:8608:30174:2000060:8361:45819:32187:44774:2000250:76:51229:1901319:44182:45793:51987:6312:727:46827:71033:71470:42307:280:706:1901673:1990598:10696:30702:30466:10898:34599:2000221:32210:6267:6302:10697:31571:60303:1903477:10570:71574:61186:6508:1905168:10571:9405:3…
1903047	mitotic cell cycle process	34 out of 125 genes, 27.2%	283 out of 6473 background genes, 4.4%	9.92e-16	0	SIN3:CDC5:ESP1:ORC1:SPC19:DAM1:GIN1:C1_11910W_A:CLB2:DAD2:CDC7:DBF2:FKH2:C3_00830C_A:ASK1:DUO1:SPC34:NUF2:RAD9:RAD52:CDC14:IPL1:IQG1:DBF4:CDC27:CR_02680W_A:MLC1:CR_03340C_A:CR_05100W_A:CDC28:DAD3:CR_06960W_A:ACE2:CR_09520C_A	6974:51038:10947:60258:6279:45944:730:90055:31939:30447:72429:6281:48478:31333:32463:1902542:1402:722:32955:71479:8608:30174:45819:32187:44774:2000250:76:51229:1901319:44182:45793:51987:6312:727:46827:71033:71470:42307:280:706:1901673:1990598:10696:30702:30466:10898:34599:2000221:32210:6267:6302:31571:60303:1903477:10570:71574:61186:6508:1905168:10571:9405:33314:71963:31110:1903353:72435:7346:723…
278	mitotic cell cycle	34 out of 125 genes, 27.2%	288 out of 6473 background genes, 4.4%	1.73e-15	0	SIN3:CDC5:ESP1:ORC1:SPC19:DAM1:GIN1:C1_11910W_A:CLB2:DAD2:CDC7:DBF2:FKH2:C3_00830C_A:ASK1:DUO1:SPC34:NUF2:RAD9:RAD52:CDC14:IPL1:IQG1:DBF4:CDC27:CR_02680W_A:MLC1:CR_03340C_A:CR_05100W_A:CDC28:DAD3:CR_06960W_A:ACE2:CR_09520C_A	6974:51038:10947:60258:6279:45944:730:90055:31939:30447:72429:6281:48478:31333:32463:1902542:1402:722:32955:71479:8608:30174:45819:32187:44774:2000250:76:51229:1901319:44182:45793:51987:6312:727:46827:71033:71470:42307:280:706:1901673:1990598:10696:30702:30466:10898:34599:2000221:32210:6267:6302:31571:60303:1903477:10570:71574:61186:6508:1905168:10571:9405:33314:71963:31110:1903353:72435:7346:723…
7049	cell cycle	43 out of 125 genes, 34.4%	495 out of 6473 background genes, 7.6%	2.66e-15	0	SIN3:CDC5:C1_01000C_A:ESP1:ORC1:SPC19:C1_06760C_A:DAM1:GIN1:C1_11910W_A:C1_13560W_A:CDH1:CLB2:DAD2:CDC7:DBF2:C2_10760C_A:FKH2:C3_00830C_A:ORC3:ASK1:DUO1:SPC34:EXO1:NUF2:ORC4:RAD9:RAD52:CDC14:IPL1:IQG1:DBF4:CDC27:CR_02680W_A:MLC1:CR_03340C_A:CR_05100W_A:CDC28:DAD3:CR_06960W_A:ACE2:CR_09520C_A:CSM1	6974:51038:1905786:10947:60258:6279:1902426:737:45944:730:90055:31939:30447:72429:6281:48478:31333:32463:1902542:1402:722:32955:71479:8608:30174:2000060:8361:45819:32187:44774:2000250:76:51229:1901319:44182:45793:51987:6312:727:46827:71033:71470:42307:280:706:1901673:1990598:10696:30702:30466:10898:34599:2000221:32210:6267:6302:10697:31571:60303:1903477:10570:71574:61186:6508:1905168:10571:9405:3…
90068	positive regulation of cell cycle process	18 out of 125 genes, 14.4%	71 out of 6473 background genes, 1.1%	4.4e-13	0	CDC5:ESP1:SPC19:DAM1:CDH1:CLB2:DAD2:CDC7:DBF2:FKH2:ZDS1:C4_05340W_A:CDC14:IPL1:DBF4:CR_02680W_A:CDC28:DAD3	6974:1905786:60258:6279:1902426:45944:90055:30447:72429:32463:1902542:1402:8608:2000060:8361:45819:44774:2000250:51229:1901319:44182:45793:51987:727:46827:71470:42307:280:706:1901673:1990598:10696:10898:2000221:32210:10697:60303:10570:6508:1905168:10571:33314:1903353:72435:7346:1902854:32888:71851:2000220:32297:51315:1904789:72428:902:44878:35853:45737:42149:1902845:1900087:18105:34501:31138:4587…
8608	attachment of spindle microtubules to kinetochore	13 out of 125 genes, 10.4%	29 out of 6473 background genes, 0.4%	1.2e-12	0	CDC5:SPC19:DAM1:DAD2:ASK1:SPC34:NUF2:IPL1:CR_02680W_A:CR_05100W_A:CDC28:DAD3:CSM1	45944:30447:72429:1902542:1402:8608:45819:44774:1901319:44182:45793:51987:46827:42307:706:1901673:10696:10898:32210:60303:10570:1905168:10571:1903353:72435:2000220:51315:1902845:1900087:18105:34501:31138:45875:6915:31670:70550:51447:10568:1904537:31031:51455:1990139:8104:22:120110:70816:183:1990758:6370:98783:90267:51726:1902424:31536:1905824:7052:1903380:6468:1903467:1990813:45892:86:7094:33316:…
32886	regulation of microtubule-based process	13 out of 125 genes, 10.4%	30 out of 6473 background genes, 0.5%	2.08e-12	0	CDC5:ESP1:SPC19:DAM1:CDH1:CLB2:DAD2:DBF2:CDC14:IPL1:CDC28:DAD3:CR_09520C_A	6974:1905786:1902426:45944:30447:72429:32463:1902542:1402:8608:2000060:8361:45819:44774:2000250:51229:1901319:44182:45793:51987:46827:71470:42307:280:706:1901673:1990598:10696:10898:32210:10697:60303:10570:6508:1905168:10571:71963:31110:1903353:72435:7346:1902854:32888:71851:2000220:1904789:44878:35853:45737:42149:1902845:1900087:18105:34501:31138:45875:6915:31670:35308:910:61167:51447:10568:1904…
70507	regulation of microtubule cytoskeleton organization	13 out of 125 genes, 10.4%	30 out of 6473 background genes, 0.5%	2.08e-12	0	CDC5:ESP1:SPC19:DAM1:CDH1:CLB2:DAD2:DBF2:CDC14:IPL1:CDC28:DAD3:CR_09520C_A	6974:1905786:1902426:45944:30447:72429:32463:1902542:1402:8608:2000060:8361:45819:44774:2000250:51229:1901319:44182:45793:51987:46827:71470:42307:280:706:1901673:1990598:10696:10898:32210:10697:60303:10570:6508:1905168:10571:71963:31110:1903353:72435:7346:1902854:32888:71851:2000220:1904789:44878:35853:45737:42149:1902845:1900087:18105:34501:31138:45875:6915:31670:35308:910:61167:51447:10568:1904…
45787	positive regulation of cell cycle	18 out of 125 genes, 14.4%	78 out of 6473 background genes, 1.2%	2.69e-12	0	CDC5:ESP1:SPC19:DAM1:CDH1:CLB2:DAD2:CDC7:DBF2:FKH2:ZDS1:C4_05340W_A:CDC14:IPL1:DBF4:CR_02680W_A:CDC28:DAD3	6974:1905786:60258:6279:1902426:45944:90055:30447:72429:32463:1902542:1402:8608:2000060:8361:45819:44774:2000250:51229:1901319:44182:45793:51987:727:46827:71470:42307:280:706:1901673:1990598:10696:10898:2000221:32210:10697:60303:10570:6508:1905168:10571:33314:1903353:72435:7346:1902854:32888:71851:2000220:32297:51315:1904789:72428:902:44878:35853:45737:42149:1902845:1900087:18105:34501:31138:4587…
10564	regulation of cell cycle process	26 out of 125 genes, 20.8%	201 out of 6473 background genes, 3.1%	3.6e-12	0	C1_00570C_A:CDC5:ESP1:ORC1:SPC19:DAM1:GIN1:CDH1:CLB2:DAD2:CDC7:DBF2:FKH2:ZDS1:C4_05340W_A:RAD9:RAD52:CDC14:IPL1:DBF4:CR_02680W_A:CR_03340C_A:CR_05100W_A:CDC28:DAD3:ACE2	6974:1905786:10947:60258:6279:1902426:45944:730:90055:30447:72429:6281:48478:31333:32463:1902542:1402:722:32955:71479:8608:2000060:8361:45819:44774:2000250:76:51229:1901319:44182:45793:51987:6312:727:46827:71470:42307:280:706:1901673:1990598:10696:30466:10898:34599:2000221:32210:6267:6302:10697:31571:60303:10570:6508:1905168:10571:9405:33314:1903353:72435:7346:723:1902854:32888:71851:70887:200022…
51984	positive regulation of chromosome segregation	11 out of 125 genes, 8.8%	22 out of 6473 background genes, 0.3%	4.38e-11	0	CDC5:SPC19:DAM1:CDH1:DAD2:DBF2:C4_05340W_A:CDC14:IPL1:CDC28:DAD3	6974:1905786:1902426:45944:30447:72429:32463:1902542:1402:8608:2000060:8361:45819:44774:2000250:51229:1901319:44182:45793:51987:46827:71470:42307:280:706:1901673:1990598:10696:10898:32210:10697:60303:10570:1905168:10571:1903353:72435:1902854:71851:2000220:32297:1904789:44878:35853:42149:1902845:1900087:18105:34501:31138:45875:31670:910:61167:51447:10568:1904537:1902846:31031:51455:1904668:1990139…
51726	regulation of cell cycle	27 out of 125 genes, 21.6%	252 out of 6473 background genes, 3.9%	1.13e-10	0	C1_00570C_A:CDC5:ESP1:ORC1:SPC19:DAM1:GIN1:CDH1:CLB2:DAD2:CDC7:DBF2:FKH2:ZDS1:C4_05340W_A:RAD9:RAD52:CDC14:IPL1:DBF4:CDC27:CR_02680W_A:CR_03340C_A:CR_05100W_A:CDC28:DAD3:ACE2	6974:1905786:10947:60258:6279:1902426:45944:730:90055:30447:72429:6281:48478:31333:32463:1902542:1402:722:32955:71479:8608:2000060:8361:45819:44774:2000250:76:51229:1901319:44182:45793:51987:6312:727:46827:71470:42307:280:706:1901673:1990598:10696:30466:10898:34599:2000221:32210:6267:6302:10697:31571:60303:10570:6508:1905168:10571:9405:33314:1903353:72435:7346:723:1902854:32888:71851:70887:200022…
98813	nuclear chromosome segregation	19 out of 125 genes, 15.2%	114 out of 6473 background genes, 1.8%	2.45e-10	0	CDC5:ESP1:SPC19:DAM1:GIN1:CLB2:DAD2:ASK1:SPC34:NUF2:CDC14:IPL1:CDC27:CR_02680W_A:CR_05100W_A:CDC28:DAD3:CR_06960W_A:CSM1	6974:45944:30447:72429:6281:48478:1902542:1402:8608:45819:44774:76:51229:1901319:44182:45793:51987:46827:71470:42307:706:1901673:1990598:10696:30466:10898:6267:32210:60303:10570:6508:1905168:10571:1903353:72435:7346:723:32888:71851:2000220:51315:6348:1904789:44878:35853:45737:42149:1902845:1900087:18105:34501:31138:45875:6915:31670:35308:70550:51447:10568:1904537:1902846:31031:51455:1990139:6470:…
51983	regulation of chromosome segregation	15 out of 125 genes, 12.0%	63 out of 6473 background genes, 1.0%	3.85e-10	0	CDC5:ESP1:SPC19:DAM1:CDH1:CLB2:DAD2:DBF2:C4_05340W_A:CDC14:IPL1:CR_02680W_A:CR_05100W_A:CDC28:DAD3	6974:1905786:1902426:45944:30447:72429:32463:1902542:1402:8608:2000060:8361:45819:44774:2000250:51229:1901319:44182:45793:51987:46827:71470:42307:280:706:1901673:1990598:10696:10898:32210:10697:60303:10570:6508:1905168:10571:1903353:72435:7346:1902854:32888:71851:2000220:32297:51315:1904789:44878:35853:45737:42149:1902845:1900087:18105:34501:31138:45875:6915:31670:35308:910:61167:51447:10568:1904…
226	microtubule cytoskeleton organization	16 out of 125 genes, 12.8%	76 out of 6473 background genes, 1.2%	4.81e-10	0	CDC5:SPC19:C1_07360W_A:DAM1:DAD2:DBF2:ASK1:DUO1:SPC34:NUF2:CDC14:IPL1:CR_02680W_A:CR_05100W_A:DAD3:CR_09520C_A	6974:30447:32463:1902542:1402:8608:44774:2000250:51229:44182:45793:51987:46827:71470:280:1901673:1990598:10696:71963:31110:1903353:1902854:2000220:51315:1904789:44878:35853:42149:18105:34501:6915:31670:910:61167:1902846:31031:51455:6470:8104:51220:22:1403:120110:31028:98783:90267:31536:1905824:7052:1903380:1902406:6468:7035:1990813:7094:33316:90307:1900461:1902412:51228:90268:9267:10458:1902425:3…
7051	spindle organization	13 out of 125 genes, 10.4%	43 out of 6473 background genes, 0.7%	5.15e-10	0	CDC5:SPC19:DAM1:DAD2:DBF2:ASK1:DUO1:SPC34:CDC14:IPL1:CR_05100W_A:DAD3:CR_09520C_A	6974:30447:32463:1902542:1402:8608:44774:2000250:51229:44182:45793:51987:46827:71470:280:1901673:1990598:10696:71963:31110:1903353:1902854:2000220:1904789:44878:35853:42149:18105:34501:6915:31670:910:61167:1902846:31031:51455:6470:8104:51220:22:1403:120110:31028:98783:90267:31536:1905824:7052:1903380:1902406:6468:7035:1990813:7094:33316:90307:1900461:1902412:51228:9267:10458:1902425:36170:1901925…
7346	regulation of mitotic cell cycle	21 out of 125 genes, 16.8%	159 out of 6473 background genes, 2.5%	1.4e-09	0	CDC5:ESP1:ORC1:GIN1:CDH1:CLB2:CDC7:DBF2:FKH2:ZDS1:C4_05340W_A:RAD9:CDC14:IPL1:DBF4:CDC27:CR_02680W_A:CR_03340C_A:CR_05100W_A:CDC28:ACE2	6974:1905786:60258:6279:1902426:45944:90055:30447:72429:6281:48478:31333:32463:1902542:1402:32955:2000060:8361:45819:44774:2000250:76:51229:1901319:44182:45793:727:46827:71470:42307:280:706:1901673:1990598:10696:30466:10898:2000221:32210:6267:6302:10697:31571:60303:10570:6508:1905168:10571:9405:33314:1903353:72435:7346:723:1902854:32888:71851:70887:2000220:32297:51315:6348:1904789:72428:902:44878…
7017	microtubule-based process	16 out of 125 genes, 12.8%	87 out of 6473 background genes, 1.3%	4.4e-09	0	CDC5:SPC19:C1_07360W_A:DAM1:DAD2:DBF2:ASK1:DUO1:SPC34:NUF2:CDC14:IPL1:CR_02680W_A:CR_05100W_A:DAD3:CR_09520C_A	6974:30447:32463:1902542:1402:8608:44774:2000250:51229:44182:45793:51987:46827:71470:280:1901673:1990598:10696:71963:31110:1903353:1902854:2000220:51315:1904789:44878:35853:42149:18105:34501:6915:31670:910:61167:1902846:31031:51455:6470:8104:51220:22:1403:120110:31028:98783:90267:31536:1905824:7052:1903380:1902406:6468:7035:1990813:7094:33316:90307:1900461:1902412:51228:90268:9267:10458:1902425:3…
7059	chromosome segregation	19 out of 125 genes, 15.2%	135 out of 6473 background genes, 2.1%	5.67e-09	0	CDC5:ESP1:SPC19:DAM1:GIN1:CLB2:DAD2:ASK1:SPC34:NUF2:CDC14:IPL1:CDC27:CR_02680W_A:CR_05100W_A:CDC28:DAD3:CR_06960W_A:CSM1	6974:45944:30447:72429:6281:48478:1902542:1402:8608:45819:44774:76:51229:1901319:44182:45793:51987:46827:71470:42307:706:1901673:1990598:10696:30466:10898:6267:32210:60303:10570:6508:1905168:10571:1903353:72435:7346:723:32888:71851:2000220:51315:6348:1904789:44878:35853:45737:42149:1902845:1900087:18105:34501:31138:45875:6915:31670:35308:70550:51447:10568:1904537:1902846:31031:51455:1990139:6470:…
45931	positive regulation of mitotic cell cycle	13 out of 125 genes, 10.4%	52 out of 6473 background genes, 0.8%	7.73e-09	0	CDC5:ESP1:CDH1:CLB2:DBF2:FKH2:ZDS1:C4_05340W_A:CDC14:IPL1:DBF4:CR_02680W_A:CDC28	6974:1905786:60258:6279:1902426:45944:90055:30447:72429:32463:1902542:1402:2000060:8361:45819:44774:2000250:51229:1901319:44182:45793:46827:71470:42307:280:706:1901673:1990598:10696:10898:2000221:32210:10697:60303:10570:6508:1905168:10571:33314:1903353:72435:7346:1902854:32888:71851:2000220:32297:51315:1904789:902:44878:35853:45737:42149:1902845:1900087:18105:34501:31138:45875:6915:31670:35308:91…
1901990	regulation of mitotic cell cycle phase transition	17 out of 125 genes, 13.6%	109 out of 6473 background genes, 1.7%	1.47e-08	0	CDC5:ESP1:ORC1:CDH1:CLB2:CDC7:DBF2:ZDS1:C4_05340W_A:RAD9:CDC14:IPL1:DBF4:CR_02680W_A:CR_03340C_A:CR_05100W_A:CDC28	6974:1905786:60258:6279:1902426:45944:30447:72429:31333:32463:1902542:1402:2000060:8361:45819:44774:2000250:51229:1901319:44182:45793:727:46827:71470:42307:280:706:1901673:1990598:10696:30466:10898:32210:6267:6302:10697:31571:60303:10570:6508:1905168:10571:33314:1903353:72435:7346:1902854:32888:71851:2000220:32297:51315:1904789:72428:44878:35853:45737:42149:1902845:77:1900087:18105:34501:31138:45…
1901987	regulation of cell cycle phase transition	17 out of 125 genes, 13.6%	111 out of 6473 background genes, 1.7%	1.99e-08	0	CDC5:ESP1:ORC1:CDH1:CLB2:CDC7:DBF2:ZDS1:C4_05340W_A:RAD9:CDC14:IPL1:DBF4:CR_02680W_A:CR_03340C_A:CR_05100W_A:CDC28	6974:1905786:60258:6279:1902426:45944:30447:72429:31333:32463:1902542:1402:2000060:8361:45819:44774:2000250:51229:1901319:44182:45793:727:46827:71470:42307:280:706:1901673:1990598:10696:30466:10898:32210:6267:6302:10697:31571:60303:10570:6508:1905168:10571:33314:1903353:72435:7346:1902854:32888:71851:2000220:32297:51315:1904789:72428:44878:35853:45737:42149:1902845:77:1900087:18105:34501:31138:45…
7052	mitotic spindle organization	11 out of 125 genes, 8.8%	36 out of 6473 background genes, 0.6%	2.97e-08	0	SPC19:DAM1:DAD2:DBF2:ASK1:DUO1:SPC34:IPL1:CR_05100W_A:DAD3:CR_09520C_A	32463:8608:44774:2000250:51987:280:1901673:71963:31110:1902854:44878:18105:34501:6915:31670:910:61167:1902846:51220:22:120110:31028:98783:90267:1905824:7052:1903380:6468:7035:7094:33316:90307:1902412:51228:1901925:90699:30448:45144:1902817:10971:31116:34503:7020:31134:51316:7096
33260	nuclear DNA replication	12 out of 125 genes, 9.6%	48 out of 6473 background genes, 0.7%	5.08e-08	0	C1_01000C_A:ORC1:C1_06760C_A:CDC7:C2_10760C_A:C3_00830C_A:ORC3:ORC4:RAD52:DBF4:CR_03340C_A:CR_06960W_A	10947:60258:6279:730:30447:6281:31333:722:71479:30174:44182:6312:727:30702:30466:34599:6267:9405:33314:51568:723:1990426:35753:6348:1903461:72428:6266:18105:1902969:45002:6277:733:10620:7533:7064:6270:27:6284:60903:1903468:724:36166:6301:1903343:82:1902977:71897:31938:6310:6289:34644:1900429:709:71902:1902975:6364:1100:43392:35690
44786	cell cycle DNA replication	12 out of 125 genes, 9.6%	49 out of 6473 background genes, 0.8%	6.62e-08	0	C1_01000C_A:ORC1:C1_06760C_A:CDC7:C2_10760C_A:C3_00830C_A:ORC3:ORC4:RAD52:DBF4:CR_03340C_A:CR_06960W_A	10947:60258:6279:730:30447:6281:31333:722:71479:30174:44182:6312:727:30702:30466:34599:6267:9405:33314:51568:723:1990426:35753:6348:1903461:72428:6266:18105:1902969:45002:6277:733:10620:7533:7064:6270:27:6284:60903:1903468:724:36166:6301:1903343:82:1902977:71897:31938:6310:6289:34644:1900429:709:71902:1902975:6364:1100:43392:35690
51988	regulation of attachment of spindle microtubules to kinetochore	7 out of 125 genes, 5.6%	10 out of 6473 background genes, 0.2%	8.06e-08	0	CDC5:SPC19:DAM1:DAD2:CDC14:CDC28:DAD3	6974:45944:30447:72429:1902542:1402:8608:45819:51229:1901319:44182:45793:51987:46827:71470:42307:706:1990598:10696:10898:32210:60303:10570:1905168:10571:1903353:72435:2000220:1904789:44878:35853:42149:1902845:1900087:18105:34501:31138:45875:31670:51447:10568:1904537:1902846:31031:51455:1990139:6470:8104:1403:70816:1990758:6370:98783:51726:1902424:31536:7052:1903380:1902406:6468:1903467:1990813:45…
51785	positive regulation of nuclear division	9 out of 125 genes, 7.2%	24 out of 6473 background genes, 0.4%	2.38e-07	0	CDC5:ESP1:CDH1:DBF2:C4_05340W_A:CDC14:IPL1:DBF4:CDC28	6974:1905786:60258:6279:1902426:45944:30447:72429:32463:1902542:1402:2000060:8361:45819:44774:2000250:51229:1901319:44182:45793:46827:71470:42307:280:706:1901673:1990598:10696:10898:32210:10697:60303:10570:6508:1905168:10571:33314:1903353:72435:1902854:32888:71851:2000220:32297:1904789:44878:35853:42149:1902845:1900087:18105:34501:31138:45875:6915:31670:910:61167:51447:10568:1904537:1902846:31031…
45840	positive regulation of mitotic nuclear division	8 out of 125 genes, 6.4%	17 out of 6473 background genes, 0.3%	2.7e-07	0	CDC5:ESP1:CDH1:DBF2:C4_05340W_A:CDC14:IPL1:CDC28	6974:1905786:1902426:45944:30447:72429:32463:1902542:1402:2000060:8361:45819:44774:2000250:51229:1901319:44182:45793:46827:71470:42307:280:706:1901673:1990598:10696:10898:32210:10697:60303:10570:6508:1905168:10571:1903353:72435:1902854:32888:71851:2000220:32297:1904789:44878:35853:42149:1902845:1900087:18105:34501:31138:45875:6915:31670:910:61167:51447:10568:1904537:1902846:31031:51455:1904668:19…
10638	positive regulation of organelle organization	15 out of 125 genes, 12.0%	98 out of 6473 background genes, 1.5%	3.27e-07	0	CDC5:ESP1:SPC19:DAM1:CDH1:CLB2:DAD2:DBF2:FKH2:C4_05340W_A:CDC14:IPL1:DBF4:CDC28:DAD3	6974:1905786:60258:6279:1902426:45944:90055:30447:72429:32463:1902542:1402:8608:2000060:8361:45819:44774:2000250:51229:1901319:44182:45793:51987:46827:71470:42307:280:706:1901673:1990598:10696:10898:2000221:32210:10697:60303:10570:6508:1905168:10571:33314:1903353:72435:7346:1902854:32888:71851:2000220:32297:1904789:902:44878:35853:45737:42149:1902845:1900087:18105:34501:31138:45875:6915:31670:353…
51276	chromosome organization	30 out of 125 genes, 24.0%	434 out of 6473 background genes, 6.7%	3.47e-07	0	SIN3:CDC5:C1_01000C_A:ESP1:ORC1:C1_05380C_A:C1_06760C_A:GIN1:C1_11910W_A:C1_13560W_A:CLB2:C2_10760C_A:FKH2:C3_00830C_A:ORC3:ZDS1:EXO1:NUF2:ORC4:RAD52:CDC14:IPL1:CDC27:CR_02680W_A:CR_03340C_A:CR_05100W_A:CDC28:CR_06960W_A:CR_07600W_A:CSM1	6974:51038:10947:737:45944:730:90055:31939:30447:72429:6281:48478:31333:1902542:1402:722:42766:71479:30174:45819:44774:16233:76:51229:1901319:44182:45793:727:6312:46827:71033:71470:42307:706:1901673:1990598:10696:30702:30466:10898:34599:2000221:32210:6267:60303:10570:61186:6508:1905168:10571:9405:33314:70869:31292:1903353:72435:51568:7346:723:32888:71851:1905779:2000220:51315:1990426:35753:6348:1…
10389	regulation of G2/M transition of mitotic cell cycle	11 out of 125 genes, 8.8%	45 out of 6473 background genes, 0.7%	4.33e-07	0	CDC5:ORC1:CLB2:CDC7:DBF2:ZDS1:CDC14:IPL1:DBF4:CR_03340C_A:CDC28	6974:60258:6279:45944:30447:72429:31333:32463:1902542:1402:45819:44774:2000250:51229:1901319:44182:45793:727:46827:71470:42307:280:706:1901673:1990598:10696:30466:10898:32210:6267:60303:10570:1905168:10571:33314:1903353:72435:7346:1902854:32888:2000220:1904789:72428:44878:35853:45737:42149:1902845:1900087:18105:34501:31138:45875:31670:1902969:35308:910:61167:51447:32880:10568:1904537:1902846:3103…
1902850	microtubule cytoskeleton organization involved in mitosis	11 out of 125 genes, 8.8%	45 out of 6473 background genes, 0.7%	4.33e-07	0	SPC19:DAM1:DAD2:DBF2:ASK1:DUO1:SPC34:IPL1:CR_05100W_A:DAD3:CR_09520C_A	32463:8608:44774:2000250:51987:280:1901673:71963:31110:1902854:44878:18105:34501:6915:31670:910:61167:1902846:51220:22:120110:31028:98783:90267:1905824:7052:1903380:6468:7035:7094:33316:90307:1902412:51228:1901925:90699:30448:45144:1902817:10971:31116:34503:7020:31134:51316:7096
16129	phytosteroid biosynthetic process	9 out of 125 genes, 7.2%	26 out of 6473 background genes, 0.4%	5.51e-07	0	ERG2:ERG1:ERG7:ERG24:ERG6:NCP1:ERG26:MCR1:ERG27	30447:34599:9405:70887:6631:36187:51668:6696:9267:36171:36170:71216:55114:36180:35690
1902653	secondary alcohol biosynthetic process	9 out of 125 genes, 7.2%	26 out of 6473 background genes, 0.4%	5.51e-07	0	ERG2:ERG1:ERG7:ERG24:ERG6:NCP1:ERG26:MCR1:ERG27	30447:34599:9405:70887:6631:36187:51668:6696:9267:36171:36170:71216:55114:36180:35690
44108	cellular alcohol biosynthetic process	9 out of 125 genes, 7.2%	26 out of 6473 background genes, 0.4%	5.51e-07	0	ERG2:ERG1:ERG7:ERG24:ERG6:NCP1:ERG26:MCR1:ERG27	30447:34599:9405:70887:6631:36187:51668:6696:9267:36171:36170:71216:55114:36180:35690
6696	ergosterol biosynthetic process	9 out of 125 genes, 7.2%	26 out of 6473 background genes, 0.4%	5.51e-07	0	ERG2:ERG1:ERG7:ERG24:ERG6:NCP1:ERG26:MCR1:ERG27	30447:34599:9405:70887:6631:36187:51668:6696:9267:36171:36170:71216:55114:36180:35690
97384	cellular lipid biosynthetic process	9 out of 125 genes, 7.2%	26 out of 6473 background genes, 0.4%	5.51e-07	0	ERG2:ERG1:ERG7:ERG24:ERG6:NCP1:ERG26:MCR1:ERG27	30447:34599:9405:70887:6631:36187:51668:6696:9267:36171:36170:71216:55114:36180:35690
1902749	regulation of cell cycle G2/M phase transition	11 out of 125 genes, 8.8%	46 out of 6473 background genes, 0.7%	5.6e-07	0	CDC5:ORC1:CLB2:CDC7:DBF2:ZDS1:CDC14:IPL1:DBF4:CR_03340C_A:CDC28	6974:60258:6279:45944:30447:72429:31333:32463:1902542:1402:45819:44774:2000250:51229:1901319:44182:45793:727:46827:71470:42307:280:706:1901673:1990598:10696:30466:10898:32210:6267:60303:10570:1905168:10571:33314:1903353:72435:7346:1902854:32888:2000220:1904789:72428:44878:35853:45737:42149:1902845:1900087:18105:34501:31138:45875:31670:1902969:35308:910:61167:51447:32880:10568:1904537:1902846:3103…
6270	DNA replication initiation	10 out of 125 genes, 8.0%	36 out of 6473 background genes, 0.6%	6.95e-07	0	C1_01000C_A:ORC1:C1_05380C_A:CDC7:C2_10760C_A:ORC3:ORC4:DBF4:CR_03340C_A:CR_06960W_A	60258:6279:31333:16233:727:30466:6267:33314:51568:6348:72428:18105:1902969:733:10620:7064:6270:60903:1903468:1903343:729:82:1902977:31938:71902:1902975:1100:43392:35690
51987	positive regulation of attachment of spindle microtubules to kinetochore	6 out of 125 genes, 4.8%	8 out of 6473 background genes, 0.1%	1.03e-06	0	CDC5:SPC19:DAM1:DAD2:CDC14:DAD3	6974:30447:1902542:1402:8608:51229:44182:45793:51987:46827:71470:1990598:10696:1903353:2000220:1904789:44878:35853:42149:34501:31670:1902846:31031:51455:6470:8104:1403:98783:31536:7052:1902406:6468:1990813:1900461:9267:10458:1902425:36170:920:30448:70194:71216:10971:712:35556:31116:36180:1990975:278:90306:45842:7096
7088	regulation of mitotic nuclear division	13 out of 125 genes, 10.4%	75 out of 6473 background genes, 1.2%	1.06e-06	0	CDC5:ESP1:CDH1:CLB2:CDC7:DBF2:C4_05340W_A:CDC14:IPL1:DBF4:CR_02680W_A:CR_05100W_A:CDC28	6974:1905786:60258:6279:1902426:45944:30447:72429:32463:1902542:1402:2000060:8361:45819:44774:2000250:51229:1901319:44182:45793:727:46827:71470:42307:280:706:1901673:1990598:10696:10898:32210:10697:60303:10570:6508:1905168:10571:33314:1903353:72435:7346:1902854:32888:71851:2000220:32297:51315:1904789:72428:44878:35853:45737:42149:1902845:1900087:18105:34501:31138:45875:6915:31670:35308:910:61167:…
16128	phytosteroid metabolic process	9 out of 125 genes, 7.2%	28 out of 6473 background genes, 0.4%	1.18e-06	0	ERG2:ERG1:ERG7:ERG24:ERG6:NCP1:ERG26:MCR1:ERG27	30447:34599:9405:70887:6631:36187:51668:6696:9267:36171:36170:71216:55114:36180:35690
1902652	secondary alcohol metabolic process	9 out of 125 genes, 7.2%	28 out of 6473 background genes, 0.4%	1.18e-06	0	ERG2:ERG1:ERG7:ERG24:ERG6:NCP1:ERG26:MCR1:ERG27	30447:34599:9405:70887:6631:36187:51668:6696:9267:36171:36170:71216:55114:36180:35690
8204	ergosterol metabolic process	9 out of 125 genes, 7.2%	28 out of 6473 background genes, 0.4%	1.18e-06	0	ERG2:ERG1:ERG7:ERG24:ERG6:NCP1:ERG26:MCR1:ERG27	30447:34599:9405:70887:6631:36187:51668:6696:9267:36171:36170:71216:55114:36180:35690
16126	sterol biosynthetic process	9 out of 125 genes, 7.2%	29 out of 6473 background genes, 0.4%	1.68e-06	0	ERG2:ERG1:ERG7:ERG24:ERG6:NCP1:ERG26:MCR1:ERG27	30447:34599:9405:70887:6631:36187:51668:6696:9267:36171:36170:71216:55114:36180:35690
6694	steroid biosynthetic process	9 out of 125 genes, 7.2%	29 out of 6473 background genes, 0.4%	1.68e-06	0	ERG2:ERG1:ERG7:ERG24:ERG6:NCP1:ERG26:MCR1:ERG27	30447:34599:9405:70887:6631:36187:51668:6696:9267:36171:36170:71216:55114:36180:35690
48523	negative regulation of cellular process	32 out of 125 genes, 25.6%	533 out of 6473 background genes, 8.2%	2.85e-06	0	SIN3:C1_01000C_A:ESP1:ORC1:C1_05380C_A:C1_06760C_A:GIN1:CDH1:CLB2:SRB9:NCB2:CDC7:DBF2:C2_10760C_A:FKH2:ORC3:ZDS1:C4_05340W_A:ORC4:RAD9:RAD52:CDC14:IPL1:DBF4:CDC27:CR_03340C_A:CR_05100W_A:CDC28:CR_06960W_A:ACE2:CR_07600W_A:CSM1	6974:51038:1905786:10947:60258:6279:1902426:45944:730:90055:31939:30447:72429:6281:48478:31333:32463:722:42766:32955:71479:30174:2000060:8361:45819:44774:16233:2000250:76:51229:1901319:44182:6312:727:71470:42307:280:706:1901673:1990598:10696:30702:30466:10898:34599:2000221:32210:6267:6302:10697:31571:60303:10570:61186:6508:1905168:10571:9405:33314:70869:72435:51568:7346:723:1902854:32888:71851:70…
44107	cellular alcohol metabolic process	9 out of 125 genes, 7.2%	31 out of 6473 background genes, 0.5%	3.28e-06	0	ERG2:ERG1:ERG7:ERG24:ERG6:NCP1:ERG26:MCR1:ERG27	30447:34599:9405:70887:6631:36187:51668:6696:9267:36171:36170:71216:55114:36180:35690
33045	regulation of sister chromatid segregation	11 out of 125 genes, 8.8%	54 out of 6473 background genes, 0.8%	3.53e-06	0	CDC5:ESP1:CDH1:CLB2:DBF2:C4_05340W_A:CDC14:IPL1:CR_02680W_A:CR_05100W_A:CDC28	6974:1905786:1902426:45944:30447:72429:32463:1902542:1402:2000060:8361:45819:44774:2000250:51229:1901319:44182:45793:46827:71470:42307:280:706:1901673:1990598:10696:10898:32210:10697:60303:10570:6508:1905168:10571:1903353:72435:7346:1902854:32888:71851:2000220:32297:51315:1904789:44878:35853:45737:42149:1902845:1900087:18105:34501:31138:45875:6915:31670:35308:910:61167:51447:10568:1904537:1902846…
33047	regulation of mitotic sister chromatid segregation	11 out of 125 genes, 8.8%	54 out of 6473 background genes, 0.8%	3.53e-06	0	CDC5:ESP1:CDH1:CLB2:DBF2:C4_05340W_A:CDC14:IPL1:CR_02680W_A:CR_05100W_A:CDC28	6974:1905786:1902426:45944:30447:72429:32463:1902542:1402:2000060:8361:45819:44774:2000250:51229:1901319:44182:45793:46827:71470:42307:280:706:1901673:1990598:10696:10898:32210:10697:60303:10570:6508:1905168:10571:1903353:72435:7346:1902854:32888:71851:2000220:32297:51315:1904789:44878:35853:45737:42149:1902845:1900087:18105:34501:31138:45875:6915:31670:35308:910:61167:51447:10568:1904537:1902846…
1901992	positive regulation of mitotic cell cycle phase transition	9 out of 125 genes, 7.2%	33 out of 6473 background genes, 0.5%	6.07e-06	0	CDC5:ESP1:CDH1:CLB2:ZDS1:C4_05340W_A:CDC14:IPL1:CDC28	6974:1905786:1902426:45944:30447:72429:1902542:1402:2000060:8361:45819:44774:51229:1901319:44182:45793:46827:71470:42307:706:1901673:1990598:10696:10898:32210:10697:60303:10570:6508:1905168:10571:1903353:72435:7346:32888:71851:2000220:32297:1904789:44878:35853:45737:42149:1902845:1900087:18105:34501:31138:45875:6915:31670:35308:51447:32880:10568:1904537:1902846:31031:51455:1904668:1990139:6470:81…
33043	regulation of organelle organization	22 out of 125 genes, 17.6%	273 out of 6473 background genes, 4.2%	6.85e-06	0	SIN3:CDC5:ESP1:SPC19:DAM1:CDH1:CLB2:DAD2:CDC7:DBF2:FKH2:C4_05340W_A:RAD52:CDC14:IPL1:DBF4:CR_02680W_A:CR_05100W_A:CDC28:DAD3:CR_06960W_A:CR_09520C_A	6974:51038:1905786:10947:60258:6279:1902426:45944:730:90055:31939:30447:72429:6281:32463:1902542:1402:722:71479:8608:30174:2000060:8361:45819:44774:2000250:51229:1901319:44182:45793:51987:6312:727:46827:71470:42307:280:706:1901673:1990598:10696:30702:30466:10898:34599:2000221:6267:32210:10697:60303:10570:61186:6508:1905168:10571:9405:33314:71963:31110:1903353:72435:723:7346:1902854:32888:71851:20…
280	nuclear division	16 out of 125 genes, 12.8%	142 out of 6473 background genes, 2.2%	8.31e-06	0	CDC5:ESP1:GIN1:CLB2:DBF2:NUF2:RAD52:CDC14:IPL1:CDC27:CR_02680W_A:CR_05100W_A:CDC28:CR_06960W_A:CR_09520C_A:CSM1	6974:10947:45944:730:30447:72429:6281:48478:32463:1902542:1402:722:71479:45819:44774:2000250:76:51229:1901319:44182:45793:727:6312:46827:71470:42307:280:706:1901673:1990598:10696:30466:10898:34599:6267:32210:60303:10570:6508:1905168:10571:9405:71963:31110:1903353:72435:7346:723:1902854:32888:71851:2000220:51315:1990426:6348:1904789:44878:35853:45737:42149:1902845:1900087:18105:34501:31138:45875:6…
51493	regulation of cytoskeleton organization	13 out of 125 genes, 10.4%	89 out of 6473 background genes, 1.4%	9.37e-06	0	CDC5:ESP1:SPC19:DAM1:CDH1:CLB2:DAD2:DBF2:CDC14:IPL1:CDC28:DAD3:CR_09520C_A	6974:1905786:1902426:45944:30447:72429:32463:1902542:1402:8608:2000060:8361:45819:44774:2000250:51229:1901319:44182:45793:51987:46827:71470:42307:280:706:1901673:1990598:10696:10898:32210:10697:60303:10570:6508:1905168:10571:71963:31110:1903353:72435:7346:1902854:32888:71851:2000220:1904789:44878:35853:45737:42149:1902845:1900087:18105:34501:31138:45875:6915:31670:35308:910:61167:51447:10568:1904…
6261	DNA-dependent DNA replication	14 out of 125 genes, 11.2%	106 out of 6473 background genes, 1.6%	9.45e-06	0	C1_01000C_A:ORC1:C1_05380C_A:C1_06760C_A:GIN1:CDC7:C2_10760C_A:C3_00830C_A:ORC3:ORC4:RAD52:DBF4:CR_03340C_A:CR_06960W_A	6974:10947:60258:6279:730:30447:6281:48478:31333:722:71479:30174:16233:76:44182:6312:727:30702:30466:34599:6267:9405:33314:51568:723:1990426:35753:6348:1903461:72428:6266:18105:1902969:45002:6277:733:10620:7533:7064:6270:27:6284:60903:1903468:724:36166:6301:1903343:729:82:31573:1902977:33262:71897:31938:6310:6289:34644:1900429:709:71902:1902975:43570:6364:1100:43392:35690
1901617	organic hydroxy compound biosynthetic process	11 out of 125 genes, 8.8%	59 out of 6473 background genes, 0.9%	9.51e-06	0	ERG2:ERG1:ERG7:ERG24:RHR2:ERG6:NCP1:ERG26:MCR1:ERG27:CR_09100C_A	30447:6071:71470:34599:9405:70887:6631:36187:36164:42821:51668:6114:44409:6696:9267:44011:36171:36170:71216:55114:36180:35690
33044	regulation of chromosome organization	15 out of 125 genes, 12.0%	125 out of 6473 background genes, 1.9%	1.04e-05	0	SIN3:CDC5:ESP1:CDH1:CLB2:CDC7:DBF2:FKH2:C4_05340W_A:CDC14:IPL1:CR_02680W_A:CR_05100W_A:CDC28:CR_06960W_A	6974:51038:1905786:60258:6279:1902426:45944:90055:31939:30447:72429:32463:1902542:1402:30174:2000060:8361:45819:44774:2000250:51229:1901319:44182:45793:727:46827:71470:42307:280:706:1901673:1990598:10696:30702:30466:10898:2000221:6267:32210:10697:60303:10570:61186:6508:1905168:10571:33314:1903353:72435:7346:1902854:32888:71851:2000220:32297:51315:1904789:72428:902:44878:35853:45737:42149:6303:190…
1901989	positive regulation of cell cycle phase transition	9 out of 125 genes, 7.2%	35 out of 6473 background genes, 0.5%	1.07e-05	0	CDC5:ESP1:CDH1:CLB2:ZDS1:C4_05340W_A:CDC14:IPL1:CDC28	6974:1905786:1902426:45944:30447:72429:1902542:1402:2000060:8361:45819:44774:51229:1901319:44182:45793:46827:71470:42307:706:1901673:1990598:10696:10898:32210:10697:60303:10570:6508:1905168:10571:1903353:72435:7346:32888:71851:2000220:32297:1904789:44878:35853:45737:42149:1902845:1900087:18105:34501:31138:45875:6915:31670:35308:51447:32880:10568:1904537:1902846:31031:51455:1904668:1990139:6470:81…
45930	negative regulation of mitotic cell cycle	13 out of 125 genes, 10.4%	91 out of 6473 background genes, 1.4%	1.23e-05	0	ORC1:GIN1:CDH1:CDC7:DBF2:RAD9:CDC14:IPL1:DBF4:CDC27:CR_03340C_A:CR_05100W_A:CDC28	6974:1905786:60258:6279:1902426:45944:72429:6281:48478:31333:32463:2000060:8361:45819:44774:2000250:76:51229:1901319:727:71470:42307:280:706:1901673:10696:1990598:30466:10898:32210:6267:6302:10697:31571:60303:10570:1905168:10571:33314:72435:723:1902854:71851:6348:1904789:72428:44878:35853:42149:1902845:77:1900087:18105:34501:31138:45875:6915:31670:1902969:910:61167:51447:10568:1904537:31031:19028…
51783	regulation of nuclear division	14 out of 125 genes, 11.2%	109 out of 6473 background genes, 1.7%	1.36e-05	0	CDC5:ESP1:CDH1:CLB2:CDC7:DBF2:C4_05340W_A:RAD52:CDC14:IPL1:DBF4:CR_02680W_A:CR_05100W_A:CDC28	6974:1905786:10947:60258:6279:1902426:45944:730:30447:72429:6281:32463:1902542:1402:722:71479:2000060:8361:45819:44774:2000250:51229:1901319:44182:45793:6312:727:46827:71470:42307:280:706:1901673:1990598:10696:10898:34599:32210:10697:60303:10570:6508:1905168:10571:9405:33314:1903353:72435:723:7346:1902854:32888:71851:2000220:32297:51315:1990426:1904789:72428:44878:35853:45737:42149:1902845:190008…
7010	cytoskeleton organization	18 out of 125 genes, 14.4%	189 out of 6473 background genes, 2.9%	1.37e-05	0	CDC5:SPC19:C1_07360W_A:DAM1:DAD2:DBF2:ASK1:DUO1:SPC34:NUF2:CDC14:IPL1:IQG1:CR_02680W_A:MLC1:CR_05100W_A:DAD3:CR_09520C_A	6974:30447:32463:1902542:1402:8608:32187:44774:2000250:51229:44182:45793:51987:46827:71470:280:1901673:1990598:10696:1903477:71574:71963:31110:1903353:1902854:2000220:51315:1904789:44878:35853:43087:42149:18105:34501:6915:31670:910:1903478:61167:1902846:31031:51455:6470:8104:51220:22:1403:120110:31028:98783:90267:31536:1905824:7052:1903380:1902406:6468:51056:7035:1990813:7094:33316:90307:1900461:…
140014	mitotic nuclear division	13 out of 125 genes, 10.4%	92 out of 6473 background genes, 1.4%	1.41e-05	0	CDC5:ESP1:GIN1:CLB2:NUF2:CDC14:IPL1:CDC27:CR_02680W_A:CR_05100W_A:CDC28:CR_06960W_A:CR_09520C_A	6974:45944:30447:72429:6281:48478:1902542:1402:45819:44774:76:51229:1901319:44182:45793:46827:71470:42307:706:1901673:1990598:10696:30466:10898:6267:32210:60303:10570:6508:1905168:10571:71963:31110:1903353:72435:7346:723:32888:71851:2000220:51315:6348:1904789:44878:35853:45737:42149:1902845:1900087:18105:34501:31138:45875:6915:31670:35308:51447:10568:1904537:1902846:31031:51455:1990139:6470:8104:…
46165	alcohol biosynthetic process	10 out of 125 genes, 8.0%	49 out of 6473 background genes, 0.8%	1.81e-05	0	ERG2:ERG1:ERG7:ERG24:RHR2:ERG6:NCP1:ERG26:MCR1:ERG27	30447:6071:71470:34599:9405:70887:6631:36187:36164:51668:6114:44409:6696:9267:44011:36171:36170:71216:55114:36180:35690
48285	organelle fission	16 out of 125 genes, 12.8%	150 out of 6473 background genes, 2.3%	1.84e-05	0	CDC5:ESP1:GIN1:CLB2:DBF2:NUF2:RAD52:CDC14:IPL1:CDC27:CR_02680W_A:CR_05100W_A:CDC28:CR_06960W_A:CR_09520C_A:CSM1	6974:10947:45944:730:30447:72429:6281:48478:32463:1902542:1402:722:71479:45819:44774:2000250:76:51229:1901319:44182:45793:727:6312:46827:71470:42307:280:706:1901673:1990598:10696:30466:10898:34599:6267:32210:60303:10570:6508:1905168:10571:9405:71963:31110:1903353:72435:7346:723:1902854:32888:71851:2000220:51315:1990426:6348:1904789:44878:35853:45737:42149:1902845:1900087:18105:34501:31138:45875:6…
16125	sterol metabolic process	9 out of 125 genes, 7.2%	38 out of 6473 background genes, 0.6%	2.36e-05	0	ERG2:ERG1:ERG7:ERG24:ERG6:NCP1:ERG26:MCR1:ERG27	30447:34599:9405:70887:6631:36187:51668:6696:9267:36171:36170:71216:55114:36180:35690
51130	positive regulation of cellular component organization	15 out of 125 genes, 12.0%	133 out of 6473 background genes, 2.1%	2.46e-05	0	CDC5:ESP1:SPC19:DAM1:CDH1:CLB2:DAD2:DBF2:FKH2:C4_05340W_A:CDC14:IPL1:DBF4:CDC28:DAD3	6974:1905786:60258:6279:1902426:45944:90055:30447:72429:32463:1902542:1402:8608:2000060:8361:45819:44774:2000250:51229:1901319:44182:45793:51987:46827:71470:42307:280:706:1901673:1990598:10696:10898:2000221:32210:10697:60303:10570:6508:1905168:10571:33314:1903353:72435:7346:1902854:32888:71851:2000220:32297:1904789:902:44878:35853:45737:42149:1902845:1900087:18105:34501:31138:45875:6915:31670:353…
6260	DNA replication	14 out of 125 genes, 11.2%	115 out of 6473 background genes, 1.8%	2.75e-05	0	C1_01000C_A:ORC1:C1_05380C_A:C1_06760C_A:GIN1:CDC7:C2_10760C_A:C3_00830C_A:ORC3:ORC4:RAD52:DBF4:CR_03340C_A:CR_06960W_A	6974:10947:60258:6279:730:30447:6281:48478:31333:722:71479:30174:16233:76:44182:6312:727:30702:30466:34599:6267:9405:33314:51568:723:1990426:35753:6348:1903461:72428:6266:18105:1902969:45002:6277:733:10620:7533:7064:6270:27:6284:60903:1903468:724:36166:6301:1903343:729:82:31573:1902977:33262:71897:31938:6310:6289:34644:1900429:709:71902:1902975:43570:6364:1100:43392:35690
45786	negative regulation of cell cycle	15 out of 125 genes, 12.0%	135 out of 6473 background genes, 2.1%	3.02e-05	0	ORC1:GIN1:CDH1:CLB2:CDC7:DBF2:RAD9:RAD52:CDC14:IPL1:DBF4:CDC27:CR_03340C_A:CR_05100W_A:CDC28	6974:1905786:10947:60258:6279:1902426:45944:730:30447:72429:6281:48478:31333:32463:722:71479:2000060:8361:45819:44774:2000250:76:51229:1901319:44182:6312:727:71470:42307:280:706:1901673:1990598:10696:30466:10898:34599:32210:6267:6302:10697:31571:60303:10570:1905168:10571:9405:33314:72435:7346:723:1902854:32888:71851:1990426:6348:1904789:72428:44878:35853:45737:42149:1902845:77:1900087:18105:34501…
60236	regulation of mitotic spindle organization	6 out of 125 genes, 4.8%	12 out of 6473 background genes, 0.2%	3.21e-05	0	ESP1:CLB2:DBF2:CDC14:IPL1:CDC28	6974:45944:30447:72429:32463:45819:44774:2000250:51229:1901319:71470:42307:280:706:1901673:1990598:10696:10898:32210:60303:10570:6508:1905168:10571:72435:7346:1902854:32888:1904789:44878:35853:45737:42149:1902845:1900087:18105:34501:31138:45875:6915:31670:35308:910:61167:51447:10568:1904537:31031:1902846:1990139:6470:51220:1403:120110:70816:75297:1990758:6370:31028:98783:1900182:90267:51726:19024…
90224	regulation of spindle organization	6 out of 125 genes, 4.8%	12 out of 6473 background genes, 0.2%	3.21e-05	0	ESP1:CLB2:DBF2:CDC14:IPL1:CDC28	6974:45944:30447:72429:32463:45819:44774:2000250:51229:1901319:71470:42307:280:706:1901673:1990598:10696:10898:32210:60303:10570:6508:1905168:10571:72435:7346:1902854:32888:1904789:44878:35853:45737:42149:1902845:1900087:18105:34501:31138:45875:6915:31670:35308:910:61167:51447:10568:1904537:31031:1902846:1990139:6470:51220:1403:120110:70816:75297:1990758:6370:31028:98783:1900182:90267:51726:19024…
8202	steroid metabolic process	9 out of 125 genes, 7.2%	40 out of 6473 background genes, 0.6%	3.84e-05	0	ERG2:ERG1:ERG7:ERG24:ERG6:NCP1:ERG26:MCR1:ERG27	30447:34599:9405:70887:6631:36187:51668:6696:9267:36171:36170:71216:55114:36180:35690
32887	regulation of spindle elongation	5 out of 125 genes, 4.0%	7 out of 6473 background genes, 0.1%	4.2e-05	0	ESP1:CLB2:DBF2:CDC14:CDC28	6974:45944:30447:72429:32463:45819:2000250:51229:1901319:71470:42307:280:706:1990598:10696:10898:32210:60303:10570:6508:1905168:10571:72435:7346:1902854:32888:1904789:44878:35853:45737:42149:1902845:1900087:18105:34501:31138:45875:6915:35308:910:61167:51447:10568:1904537:31031:1902846:1990139:6470:51220:1403:70816:75297:1990758:6370:31028:98783:1900182:51726:1902424:31536:7052:1903380:1902406:646…
32888	regulation of mitotic spindle elongation	5 out of 125 genes, 4.0%	7 out of 6473 background genes, 0.1%	4.2e-05	0	ESP1:CLB2:DBF2:CDC14:CDC28	6974:45944:30447:72429:32463:45819:2000250:51229:1901319:71470:42307:280:706:1990598:10696:10898:32210:60303:10570:6508:1905168:10571:72435:7346:1902854:32888:1904789:44878:35853:45737:42149:1902845:1900087:18105:34501:31138:45875:6915:35308:910:61167:51447:10568:1904537:31031:1902846:1990139:6470:51220:1403:70816:75297:1990758:6370:31028:98783:1900182:51726:1902424:31536:7052:1903380:1902406:646…
1902299	pre-replicative complex assembly involved in cell cycle DNA replication	7 out of 125 genes, 5.6%	20 out of 6473 background genes, 0.3%	4.43e-05	0	C1_01000C_A:ORC1:C1_06760C_A:C2_10760C_A:ORC3:ORC4:CR_06960W_A	30174:30702:30466:6267:33314:51568:6348:1902969:7064:6270:27:31938:1902975:6364:35690
36388	pre-replicative complex assembly	7 out of 125 genes, 5.6%	20 out of 6473 background genes, 0.3%	4.43e-05	0	C1_01000C_A:ORC1:C1_06760C_A:C2_10760C_A:ORC3:ORC4:CR_06960W_A	30174:30702:30466:6267:33314:51568:6348:1902969:7064:6270:27:31938:1902975:6364:35690
6267	pre-replicative complex assembly involved in nuclear cell cycle DNA replication	7 out of 125 genes, 5.6%	20 out of 6473 background genes, 0.3%	4.43e-05	0	C1_01000C_A:ORC1:C1_06760C_A:C2_10760C_A:ORC3:ORC4:CR_06960W_A	30174:30702:30466:6267:33314:51568:6348:1902969:7064:6270:27:31938:1902975:6364:35690
6996	organelle organization	45 out of 125 genes, 36.0%	1056 out of 6473 background genes, 16.3%	4.63e-05	0	SIN3:CDC5:C1_01000C_A:ESP1:ORC1:SPC19:C1_05380C_A:ANT1:C1_06760C_A:C1_07360W_A:DAM1:GIN1:C1_11910W_A:C1_13560W_A:CLB2:DAD2:DBF2:C2_10760C_A:FKH2:C3_00830C_A:ORC3:ASK1:DUO1:ZDS1:SPC34:EXO1:NUF2:ORC4:RAD52:CDC14:IPL1:IQG1:TRS33:CDC27:CR_02680W_A:MLC1:CR_03340C_A:CR_05100W_A:CDC28:DAD3:CR_06960W_A:CR_07600W_A:ACO1:CR_09520C_A:CSM1	6974:51038:10947:737:45944:730:90055:31939:30447:72429:6281:48478:31333:32463:1902542:1402:16239:722:42766:71479:8608:30174:15867:34497:45819:32187:44774:16233:2000250:76:51229:1901319:44182:45793:51987:727:6312:46827:71033:71470:34629:42307:280:706:1901673:1990598:10696:30702:30466:10898:34599:2000221:32210:6267:60303:1903477:10570:71574:61186:6508:1905168:10571:9405:33314:71963:31110:70869:3129…
10948	negative regulation of cell cycle process	13 out of 125 genes, 10.4%	103 out of 6473 background genes, 1.6%	5.68e-05	0	ORC1:CDH1:CLB2:CDC7:DBF2:RAD9:RAD52:CDC14:IPL1:DBF4:CR_03340C_A:CR_05100W_A:CDC28	6974:1905786:10947:60258:6279:1902426:45944:730:30447:72429:6281:31333:32463:722:71479:2000060:8361:45819:44774:2000250:51229:1901319:44182:6312:727:71470:42307:280:706:1901673:1990598:10696:30466:10898:34599:32210:6267:6302:10697:31571:60303:10570:1905168:10571:9405:33314:72435:723:7346:1902854:32888:71851:1990426:1904789:72428:44878:35853:45737:42149:1902845:77:1900087:18105:34501:31138:45875:6…
7080	mitotic metaphase plate congression	6 out of 125 genes, 4.8%	13 out of 6473 background genes, 0.2%	5.88e-05	0	CLB2:NUF2:CDC14:IPL1:CR_02680W_A:CDC28	6974:45944:30447:72429:45819:44774:51229:1901319:71470:42307:706:1901673:1990598:10696:10898:32210:60303:10570:1905168:10571:72435:7346:32888:51315:1904789:44878:35853:45737:42149:1902845:1900087:18105:34501:31138:45875:31670:35308:51447:10568:1904537:31031:1902846:51455:1990139:6470:1403:120110:70816:75297:1990758:6370:98783:1900182:90267:51726:1902424:31536:1905824:1903380:1902406:6468:1903467:…
51128	regulation of cellular component organization	25 out of 125 genes, 20.0%	391 out of 6473 background genes, 6.0%	6.27e-05	0	SIN3:CDC5:ESP1:SPC19:DAM1:CDH1:CLB2:NCB2:DAD2:CDC7:DBF2:FKH2:C4_05340W_A:RAD52:CDC14:IPL1:DBF4:CR_02680W_A:CR_03340C_A:CR_05100W_A:CDC28:DAD3:CR_06960W_A:ACE2:CR_09520C_A	6974:51038:1905786:10947:60258:6279:1902426:45944:730:90055:31939:30447:72429:6281:31333:32463:1902542:1402:722:32955:71479:8608:30174:2000060:8361:45819:44774:2000250:51229:1901319:44182:45793:51987:6312:727:46827:71470:42307:280:706:1901673:1990598:10696:30702:30466:10898:34599:2000221:6267:32210:10697:60303:10570:61186:6508:1905168:10571:9405:33314:71963:31110:1903353:72435:723:7346:1902854:32…
48519	negative regulation of biological process	33 out of 125 genes, 26.4%	643 out of 6473 background genes, 9.9%	7.54e-05	0	SIN3:C1_01000C_A:ESP1:ORC1:C1_05380C_A:C1_06760C_A:GIN1:C1_11910W_A:CDH1:CLB2:SRB9:NCB2:CDC7:DBF2:C2_10760C_A:FKH2:ORC3:ZDS1:C4_05340W_A:ORC4:RAD9:RAD52:CDC14:IPL1:DBF4:CDC27:CR_03340C_A:CR_05100W_A:CDC28:CR_06960W_A:ACE2:CR_07600W_A:CSM1	6974:51038:1905786:10947:60258:6279:1902426:45944:730:90055:31939:30447:72429:6281:48478:31333:32463:722:42766:32955:71479:30174:2000060:8361:45819:44774:16233:2000250:76:51229:1901319:44182:6312:727:71033:71470:42307:280:706:1901673:1990598:10696:30702:30466:10898:34599:2000221:32210:6267:6302:10697:31571:60303:10570:61186:6508:1905168:10571:9405:33314:70869:72435:51568:7346:723:1902854:32888:71…
30466	chromatin silencing at silent mating-type cassette	9 out of 125 genes, 7.2%	43 out of 6473 background genes, 0.7%	7.55e-05	0	C1_01000C_A:ORC1:C1_05380C_A:GIN1:C2_10760C_A:ORC3:ORC4:CR_06960W_A:CR_07600W_A	6974:6281:48478:42766:16233:76:30466:6267:33314:70869:51568:723:6348:1902969:122:183:43044:7064:6270:729:31573:16584:33262:31938:70870:1902975:43570:35690
51495	positive regulation of cytoskeleton organization	9 out of 125 genes, 7.2%	43 out of 6473 background genes, 0.7%	7.55e-05	0	CDC5:SPC19:DAM1:CLB2:DAD2:DBF2:CDC14:CDC28:DAD3	6974:45944:30447:72429:32463:1902542:1402:8608:45819:2000250:51229:1901319:44182:45793:51987:46827:71470:42307:280:706:1990598:10696:10898:32210:60303:10570:1905168:10571:1903353:72435:7346:1902854:32888:2000220:1904789:44878:35853:45737:42149:1902845:1900087:18105:34501:31138:45875:31670:35308:910:61167:51447:10568:1904537:1902846:31031:51455:1990139:6470:8104:51220:1403:70816:75297:1990758:6370…
51310	metaphase plate congression	6 out of 125 genes, 4.8%	14 out of 6473 background genes, 0.2%	0.0001	0	CLB2:NUF2:CDC14:IPL1:CR_02680W_A:CDC28	6974:45944:30447:72429:45819:44774:51229:1901319:71470:42307:706:1901673:1990598:10696:10898:32210:60303:10570:1905168:10571:72435:7346:32888:51315:1904789:44878:35853:45737:42149:1902845:1900087:18105:34501:31138:45875:31670:35308:51447:10568:1904537:31031:1902846:51455:1990139:6470:1403:120110:70816:75297:1990758:6370:98783:1900182:90267:51726:1902424:31536:1905824:1903380:1902406:6468:1903467:…
45934	negative regulation of nucleobase-containing compound metabolic process	21 out of 125 genes, 16.8%	291 out of 6473 background genes, 4.5%	0.0001	0	SIN3:C1_01000C_A:ORC1:C1_05380C_A:C1_06760C_A:GIN1:SRB9:NCB2:CDC7:C2_10760C_A:FKH2:ORC3:ZDS1:C4_05340W_A:ORC4:RAD52:CDC28:CR_06960W_A:ACE2:CR_07600W_A:CSM1	6974:51038:10947:60258:6279:45944:730:90055:31939:30447:72429:6281:48478:722:42766:32955:71479:30174:45819:16233:76:1901319:44182:6312:727:42307:706:10696:30702:30466:10898:34599:2000221:32210:6267:60303:10570:61186:1905168:10571:9405:33314:70869:72435:51568:723:70887:32297:1990426:6348:72428:902:6303:1902845:1900087:18105:31138:45875:1902969:70550:60196:51447:71930:32880:31031:10568:1904537:6369…
98783	correction of merotelic kinetochore attachment, mitotic	4 out of 125 genes, 3.2%	4 out of 6473 background genes, 0.1%	0.00011	0	CLB2:CDC14:IPL1:CDC28	6974:45944:30447:72429:45819:44774:51229:1901319:71470:42307:706:1901673:1990598:10696:10898:32210:60303:10570:1905168:10571:72435:7346:32888:1904789:44878:35853:45737:42149:1902845:1900087:18105:34501:31138:45875:31670:35308:51447:10568:1904537:31031:1902846:1990139:6470:1403:120110:70816:75297:1990758:6370:98783:1900182:90267:51726:1902424:31536:1905824:1903380:1902406:6468:1903467:45892:86:709…
7096	regulation of exit from mitosis	8 out of 125 genes, 6.4%	33 out of 6473 background genes, 0.5%	0.00011	0	CDC5:ESP1:CDH1:CDC7:DBF2:CDC14:DBF4:CDC28	6974:1905786:60258:6279:1902426:45944:30447:72429:32463:1902542:1402:2000060:8361:45819:2000250:51229:1901319:44182:45793:727:46827:71470:42307:280:706:1990598:10696:10898:32210:10697:60303:10570:6508:1905168:10571:33314:1903353:72435:1902854:32888:71851:2000220:1904789:72428:44878:35853:42149:1902845:1900087:18105:34501:31138:45875:6915:31670:910:61167:51447:10568:1904537:1902846:31031:51455:190…
819	sister chromatid segregation	12 out of 125 genes, 9.6%	92 out of 6473 background genes, 1.4%	0.00012	0	CDC5:ESP1:GIN1:CLB2:NUF2:CDC14:IPL1:CDC27:CR_02680W_A:CR_05100W_A:CDC28:CR_06960W_A	6974:45944:30447:72429:6281:48478:1902542:1402:45819:44774:76:51229:1901319:44182:45793:46827:71470:42307:706:1901673:1990598:10696:30466:10898:6267:32210:60303:10570:6508:1905168:10571:1903353:72435:7346:723:32888:71851:2000220:51315:6348:1904789:44878:35853:45737:42149:1902845:1900087:18105:34501:31138:45875:6915:31670:35308:51447:10568:1904537:1902846:31031:51455:1990139:6470:8104:22:1403:1201…
70	mitotic sister chromatid segregation	11 out of 125 genes, 8.8%	76 out of 6473 background genes, 1.2%	0.00014	0	ESP1:GIN1:CLB2:NUF2:CDC14:IPL1:CDC27:CR_02680W_A:CR_05100W_A:CDC28:CR_06960W_A	6974:45944:30447:72429:6281:48478:45819:44774:76:51229:1901319:71470:42307:706:1901673:1990598:10696:30466:10898:6267:32210:60303:10570:6508:1905168:10571:72435:7346:723:32888:71851:51315:6348:1904789:44878:35853:45737:42149:1902845:1900087:18105:34501:31138:45875:6915:31670:35308:51447:10568:1904537:31031:1902846:51455:1990139:6470:22:1403:120110:70816:75297:1990758:7064:6370:98783:1900182:90267…
6066	alcohol metabolic process	11 out of 125 genes, 8.8%	77 out of 6473 background genes, 1.2%	0.00016	0	ERG2:ERG1:DAK2:ERG7:ERG24:RHR2:ERG6:NCP1:ERG26:MCR1:ERG27	30447:6071:71470:34599:97237:9405:70887:6631:36187:36164:51668:6114:44409:6696:9267:44011:36171:36170:71216:55114:36180:35690
51172	negative regulation of nitrogen compound metabolic process	23 out of 125 genes, 18.4%	354 out of 6473 background genes, 5.5%	0.00017	0	SIN3:C1_01000C_A:ESP1:ORC1:C1_05380C_A:C1_06760C_A:GIN1:CLB2:SRB9:NCB2:CDC7:C2_10760C_A:FKH2:ORC3:ZDS1:C4_05340W_A:ORC4:RAD52:CDC28:CR_06960W_A:ACE2:CR_07600W_A:CSM1	6974:51038:10947:60258:6279:45944:730:90055:31939:30447:72429:6281:48478:722:42766:32955:71479:30174:45819:16233:76:1901319:44182:6312:727:42307:706:10696:30702:30466:10898:34599:2000221:32210:6267:60303:10570:61186:6508:1905168:10571:9405:33314:70869:72435:51568:7346:723:32888:70887:32297:1990426:6348:72428:902:45737:6303:1902845:1900087:18105:31138:45875:6915:1902969:35308:70550:60196:51447:719…
1902679	negative regulation of RNA biosynthetic process	19 out of 125 genes, 15.2%	248 out of 6473 background genes, 3.8%	0.00018	0	SIN3:C1_01000C_A:ORC1:C1_05380C_A:C1_06760C_A:GIN1:SRB9:NCB2:CDC7:C2_10760C_A:FKH2:ORC3:ZDS1:ORC4:CDC28:CR_06960W_A:ACE2:CR_07600W_A:CSM1	6974:51038:60258:6279:45944:90055:31939:30447:72429:6281:48478:42766:32955:30174:45819:16233:76:1901319:44182:727:42307:706:10696:30702:30466:10898:2000221:32210:6267:60303:10570:61186:1905168:10571:9405:33314:70869:72435:51568:723:70887:6348:72428:902:6303:1902845:1900087:18105:31138:45875:1902969:70550:60196:51447:71930:32880:31031:10568:1904537:6369:83:51455:90419:1990139:122:70816:183:10620:4…
1903507	negative regulation of nucleic acid-templated transcription	19 out of 125 genes, 15.2%	248 out of 6473 background genes, 3.8%	0.00018	0	SIN3:C1_01000C_A:ORC1:C1_05380C_A:C1_06760C_A:GIN1:SRB9:NCB2:CDC7:C2_10760C_A:FKH2:ORC3:ZDS1:ORC4:CDC28:CR_06960W_A:ACE2:CR_07600W_A:CSM1	6974:51038:60258:6279:45944:90055:31939:30447:72429:6281:48478:42766:32955:30174:45819:16233:76:1901319:44182:727:42307:706:10696:30702:30466:10898:2000221:32210:6267:60303:10570:61186:1905168:10571:9405:33314:70869:72435:51568:723:70887:6348:72428:902:6303:1902845:1900087:18105:31138:45875:1902969:70550:60196:51447:71930:32880:31031:10568:1904537:6369:83:51455:90419:1990139:122:70816:183:10620:4…
45892	negative regulation of transcription, DNA-templated	19 out of 125 genes, 15.2%	248 out of 6473 background genes, 3.8%	0.00018	0	SIN3:C1_01000C_A:ORC1:C1_05380C_A:C1_06760C_A:GIN1:SRB9:NCB2:CDC7:C2_10760C_A:FKH2:ORC3:ZDS1:ORC4:CDC28:CR_06960W_A:ACE2:CR_07600W_A:CSM1	6974:51038:60258:6279:45944:90055:31939:30447:72429:6281:48478:42766:32955:30174:45819:16233:76:1901319:44182:727:42307:706:10696:30702:30466:10898:2000221:32210:6267:60303:10570:61186:1905168:10571:9405:33314:70869:72435:51568:723:70887:6348:72428:902:6303:1902845:1900087:18105:31138:45875:1902969:70550:60196:51447:71930:32880:31031:10568:1904537:6369:83:51455:90419:1990139:122:70816:183:10620:4…
6259	DNA metabolic process	23 out of 125 genes, 18.4%	357 out of 6473 background genes, 5.5%	0.00019	0	SIN3:CDC5:C1_01000C_A:ORC1:C1_05380C_A:C1_06760C_A:GIN1:C1_11910W_A:C1_13560W_A:CDC7:C2_10760C_A:C3_00830C_A:ORC3:EXO1:ORC4:RAD9:RAD52:DBF4:CR_03340C_A:CR_05010W_A:CDC28:CR_06960W_A:CR_07600W_A	6974:51038:10947:60258:6279:737:45944:730:31939:30447:72429:6281:48478:31333:1902542:1402:722:42766:71479:30174:45819:16233:76:1901319:44182:45793:6312:727:46827:71033:42307:706:10696:30702:30466:10898:34599:32210:6267:6302:31571:60303:10570:61186:1905168:10571:9405:33314:70869:31292:1903353:72435:51568:723:1905779:2000220:1990426:35753:6348:1903461:72428:6266:6303:1902845:77:1900087:18105:31138:…
7093	mitotic cell cycle checkpoint	10 out of 125 genes, 8.0%	63 out of 6473 background genes, 1.0%	0.00022	0	ORC1:GIN1:CDC7:DBF2:RAD9:CDC14:IPL1:DBF4:CR_03340C_A:CR_05100W_A	6974:60258:6279:45944:6281:48478:31333:32463:44774:2000250:76:51229:727:71470:280:1901673:1990598:30466:6267:6302:31571:33314:723:1902854:6348:1904789:72428:44878:35853:42149:77:18105:34501:6915:31670:1902969:910:61167:31031:1902846:6470:51220:22:1403:120110:733:10620:7064:31028:98783:90267:6270:31536:1905824:7052:1903380:1902406:6468:7035:60903:1903468:1903343:7094:33316:82:1902412:51228:31573:1…
729	DNA double-strand break processing	5 out of 125 genes, 4.0%	9 out of 6473 background genes, 0.1%	0.00024	0	C1_05380C_A:C1_13560W_A:EXO1:CDC28:CR_07600W_A	737:45944:72429:42766:45819:16233:1901319:42307:706:10696:30466:10898:32210:60303:10570:1905168:10571:70869:31292:72435:1905779:6348:1902845:1900087:18105:31138:45875:51447:31031:10568:1904537:31860:1990139:122:70816:183:43044:1990758:6370:98783:51726:6270:1902424:31536:1903380:6468:1903467:45892:86:729:82:10791:7130:2001033:6298:16584:30448:1990820:10971:51446:18107:70870:35306:42138:1905785:901…
51303	establishment of chromosome localization	6 out of 125 genes, 4.8%	16 out of 6473 background genes, 0.2%	0.00026	0	CLB2:NUF2:CDC14:IPL1:CR_02680W_A:CDC28	6974:45944:30447:72429:45819:44774:51229:1901319:71470:42307:706:1901673:1990598:10696:10898:32210:60303:10570:1905168:10571:72435:7346:32888:51315:1904789:44878:35853:45737:42149:1902845:1900087:18105:34501:31138:45875:31670:35308:51447:10568:1904537:31031:1902846:51455:1990139:6470:1403:120110:70816:75297:1990758:6370:98783:1900182:90267:51726:1902424:31536:1905824:1903380:1902406:6468:1903467:…
51253	negative regulation of RNA metabolic process	19 out of 125 genes, 15.2%	254 out of 6473 background genes, 3.9%	0.00026	0	SIN3:C1_01000C_A:ORC1:C1_05380C_A:C1_06760C_A:GIN1:SRB9:NCB2:CDC7:C2_10760C_A:FKH2:ORC3:ZDS1:ORC4:CDC28:CR_06960W_A:ACE2:CR_07600W_A:CSM1	6974:51038:60258:6279:45944:90055:31939:30447:72429:6281:48478:42766:32955:30174:45819:16233:76:1901319:44182:727:42307:706:10696:30702:30466:10898:2000221:32210:6267:60303:10570:61186:1905168:10571:9405:33314:70869:72435:51568:723:70887:6348:72428:902:6303:1902845:1900087:18105:31138:45875:1902969:70550:60196:51447:71930:32880:31031:10568:1904537:6369:83:51455:90419:1990139:122:70816:183:10620:4…
45814	negative regulation of gene expression, epigenetic	13 out of 125 genes, 10.4%	122 out of 6473 background genes, 1.9%	0.00042	0	SIN3:C1_01000C_A:ORC1:C1_05380C_A:C1_06760C_A:GIN1:C2_10760C_A:ORC3:ZDS1:ORC4:CR_06960W_A:CR_07600W_A:CSM1	6974:51038:31939:30447:6281:48478:42766:30174:16233:76:30702:30466:6267:61186:33314:70869:51568:723:6348:6303:1902969:70550:32880:51455:122:183:43044:7064:6270:27:61408:30010:16575:729:61188:9267:6342:31573:16584:36170:117:33262:31938:16479:71216:10971:70870:34503:36180:6406:1902975:43570:61587:1302:6364:35690
6342	chromatin silencing	13 out of 125 genes, 10.4%	122 out of 6473 background genes, 1.9%	0.00042	0	SIN3:C1_01000C_A:ORC1:C1_05380C_A:C1_06760C_A:GIN1:C2_10760C_A:ORC3:ZDS1:ORC4:CR_06960W_A:CR_07600W_A:CSM1	6974:51038:31939:30447:6281:48478:42766:30174:16233:76:30702:30466:6267:61186:33314:70869:51568:723:6348:6303:1902969:70550:32880:51455:122:183:43044:7064:6270:27:61408:30010:16575:729:61188:9267:6342:31573:16584:36170:117:33262:31938:16479:71216:10971:70870:34503:36180:6406:1902975:43570:61587:1302:6364:35690
10558	negative regulation of macromolecule biosynthetic process	20 out of 125 genes, 16.0%	290 out of 6473 background genes, 4.5%	0.00046	0	SIN3:C1_01000C_A:ORC1:C1_05380C_A:C1_06760C_A:GIN1:SRB9:NCB2:CDC7:C2_10760C_A:FKH2:ORC3:ZDS1:C4_05340W_A:ORC4:CDC28:CR_06960W_A:ACE2:CR_07600W_A:CSM1	6974:51038:60258:6279:45944:90055:31939:30447:72429:6281:48478:42766:32955:30174:45819:16233:76:1901319:44182:727:42307:706:10696:30702:30466:10898:2000221:32210:6267:60303:10570:61186:1905168:10571:9405:33314:70869:72435:51568:723:70887:32297:6348:72428:902:6303:1902845:1900087:18105:31138:45875:1902969:70550:60196:51447:71930:32880:31031:10568:1904537:6369:83:51455:90419:1990139:122:70816:183:1…
2000113	negative regulation of cellular macromolecule biosynthetic process	20 out of 125 genes, 16.0%	290 out of 6473 background genes, 4.5%	0.00046	0	SIN3:C1_01000C_A:ORC1:C1_05380C_A:C1_06760C_A:GIN1:SRB9:NCB2:CDC7:C2_10760C_A:FKH2:ORC3:ZDS1:C4_05340W_A:ORC4:CDC28:CR_06960W_A:ACE2:CR_07600W_A:CSM1	6974:51038:60258:6279:45944:90055:31939:30447:72429:6281:48478:42766:32955:30174:45819:16233:76:1901319:44182:727:42307:706:10696:30702:30466:10898:2000221:32210:6267:60303:10570:61186:1905168:10571:9405:33314:70869:72435:51568:723:70887:32297:6348:72428:902:6303:1902845:1900087:18105:31138:45875:1902969:70550:60196:51447:71930:32880:31031:10568:1904537:6369:83:51455:90419:1990139:122:70816:183:1…
2001252	positive regulation of chromosome organization	8 out of 125 genes, 6.4%	39 out of 6473 background genes, 0.6%	0.00047	0	CDC5:CDH1:DBF2:FKH2:C4_05340W_A:CDC14:IPL1:CDC28	6974:1905786:1902426:45944:90055:30447:72429:32463:1902542:1402:2000060:8361:45819:44774:2000250:51229:1901319:44182:45793:46827:71470:42307:280:706:1901673:1990598:10696:10898:2000221:32210:10697:60303:10570:1905168:10571:1903353:72435:1902854:71851:2000220:32297:1904789:902:44878:35853:42149:1902845:1900087:18105:34501:31138:45875:31670:910:61167:51447:71930:10568:1904537:1902846:31031:6369:514…
31324	negative regulation of cellular metabolic process	23 out of 125 genes, 18.4%	376 out of 6473 background genes, 5.8%	0.0005	0	SIN3:C1_01000C_A:ESP1:ORC1:C1_05380C_A:C1_06760C_A:GIN1:CLB2:SRB9:NCB2:CDC7:C2_10760C_A:FKH2:ORC3:ZDS1:C4_05340W_A:ORC4:RAD52:CDC28:CR_06960W_A:ACE2:CR_07600W_A:CSM1	6974:51038:10947:60258:6279:45944:730:90055:31939:30447:72429:6281:48478:722:42766:32955:71479:30174:45819:16233:76:1901319:44182:6312:727:42307:706:10696:30702:30466:10898:34599:2000221:32210:6267:60303:10570:61186:6508:1905168:10571:9405:33314:70869:72435:51568:7346:723:32888:70887:32297:1990426:6348:72428:902:45737:6303:1902845:1900087:18105:31138:45875:6915:1902969:35308:70550:60196:51447:719…
1901615	organic hydroxy compound metabolic process	12 out of 125 genes, 9.6%	107 out of 6473 background genes, 1.7%	0.00069	0	ERG2:ERG1:DAK2:ERG7:ERG24:RHR2:ERG6:NCP1:ERG26:MCR1:ERG27:CR_09100C_A	30447:6071:71470:34599:97237:9405:70887:6631:36187:36164:42821:51668:6114:44409:6696:9267:44011:36171:36170:71216:55114:36180:35690
10971	positive regulation of G2/M transition of mitotic cell cycle	5 out of 125 genes, 4.0%	11 out of 6473 background genes, 0.2%	0.00086	0	CDC5:CLB2:ZDS1:IPL1:CDC28	45944:30447:72429:1902542:1402:45819:44774:1901319:44182:45793:46827:42307:706:1901673:10696:10898:32210:60303:10570:1905168:10571:1903353:72435:7346:32888:2000220:45737:1902845:1900087:18105:34501:31138:45875:31670:35308:51447:32880:10568:1904537:31031:51455:1990139:8104:120110:70816:75297:1990758:6370:98783:1900182:90267:51726:1902424:31536:1905824:1903380:6468:1903467:1990813:30010:45892:86:70…
1901970	positive regulation of mitotic sister chromatid separation	5 out of 125 genes, 4.0%	11 out of 6473 background genes, 0.2%	0.00086	0	CDC5:CDH1:C4_05340W_A:IPL1:CDC28	1905786:1902426:45944:30447:72429:1902542:1402:2000060:8361:45819:44774:1901319:44182:45793:46827:42307:706:1901673:10696:10898:32210:10697:60303:10570:1905168:10571:1903353:72435:71851:2000220:32297:1902845:1900087:18105:34501:31138:45875:31670:51447:10568:1904537:31031:51455:1904668:1990139:8104:120110:70816:1990758:6370:98783:90267:51726:1902424:31536:1905824:1903380:6468:1903467:1990813:45892…
1905820	positive regulation of chromosome separation	5 out of 125 genes, 4.0%	11 out of 6473 background genes, 0.2%	0.00086	0	CDC5:CDH1:C4_05340W_A:IPL1:CDC28	1905786:1902426:45944:30447:72429:1902542:1402:2000060:8361:45819:44774:1901319:44182:45793:46827:42307:706:1901673:10696:10898:32210:10697:60303:10570:1905168:10571:1903353:72435:71851:2000220:32297:1902845:1900087:18105:34501:31138:45875:31670:51447:10568:1904537:31031:51455:1904668:1990139:8104:120110:70816:1990758:6370:98783:90267:51726:1902424:31536:1905824:1903380:6468:1903467:1990813:45892…
16458	gene silencing	13 out of 125 genes, 10.4%	130 out of 6473 background genes, 2.0%	0.00089	0	SIN3:C1_01000C_A:ORC1:C1_05380C_A:C1_06760C_A:GIN1:C2_10760C_A:ORC3:ZDS1:ORC4:CR_06960W_A:CR_07600W_A:CSM1	6974:51038:31939:30447:6281:48478:42766:30174:16233:76:30702:30466:6267:61186:33314:70869:51568:723:6348:6303:1902969:70550:32880:51455:122:183:43044:7064:6270:27:61408:30010:16575:729:61188:9267:6342:31573:16584:36170:117:33262:31938:16479:71216:10971:70870:34503:36180:6406:1902975:43570:61587:1302:6364:35690
10605	negative regulation of macromolecule metabolic process	24 out of 125 genes, 19.2%	420 out of 6473 background genes, 6.5%	0.00095	0	SIN3:C1_01000C_A:ESP1:ORC1:C1_05380C_A:C1_06760C_A:GIN1:C1_11910W_A:CLB2:SRB9:NCB2:CDC7:C2_10760C_A:FKH2:ORC3:ZDS1:C4_05340W_A:ORC4:RAD52:CDC28:CR_06960W_A:ACE2:CR_07600W_A:CSM1	6974:51038:10947:60258:6279:45944:730:90055:31939:30447:72429:6281:48478:722:42766:32955:71479:30174:45819:16233:76:1901319:44182:6312:727:71033:42307:706:10696:30702:30466:10898:34599:2000221:32210:6267:60303:10570:61186:6508:1905168:10571:9405:33314:70869:72435:51568:7346:723:32888:70887:32297:1990426:6348:72428:902:45737:6303:1902845:1900087:18105:31138:45875:6915:1902969:35308:70550:60196:514…
1902751	positive regulation of cell cycle G2/M phase transition	5 out of 125 genes, 4.0%	12 out of 6473 background genes, 0.2%	0.00146	0	CDC5:CLB2:ZDS1:IPL1:CDC28	45944:30447:72429:1902542:1402:45819:44774:1901319:44182:45793:46827:42307:706:1901673:10696:10898:32210:60303:10570:1905168:10571:1903353:72435:7346:32888:2000220:45737:1902845:1900087:18105:34501:31138:45875:31670:35308:51447:32880:10568:1904537:31031:51455:1990139:8104:120110:70816:75297:1990758:6370:98783:1900182:90267:51726:1902424:31536:1905824:1903380:6468:1903467:1990813:30010:45892:86:70…
31327	negative regulation of cellular biosynthetic process	20 out of 125 genes, 16.0%	312 out of 6473 background genes, 4.8%	0.00146	0	SIN3:C1_01000C_A:ORC1:C1_05380C_A:C1_06760C_A:GIN1:SRB9:NCB2:CDC7:C2_10760C_A:FKH2:ORC3:ZDS1:C4_05340W_A:ORC4:CDC28:CR_06960W_A:ACE2:CR_07600W_A:CSM1	6974:51038:60258:6279:45944:90055:31939:30447:72429:6281:48478:42766:32955:30174:45819:16233:76:1901319:44182:727:42307:706:10696:30702:30466:10898:2000221:32210:6267:60303:10570:61186:1905168:10571:9405:33314:70869:72435:51568:723:70887:32297:6348:72428:902:6303:1902845:1900087:18105:31138:45875:1902969:70550:60196:51447:71930:32880:31031:10568:1904537:6369:83:51455:90419:1990139:122:70816:183:1…
9890	negative regulation of biosynthetic process	20 out of 125 genes, 16.0%	312 out of 6473 background genes, 4.8%	0.00146	0	SIN3:C1_01000C_A:ORC1:C1_05380C_A:C1_06760C_A:GIN1:SRB9:NCB2:CDC7:C2_10760C_A:FKH2:ORC3:ZDS1:C4_05340W_A:ORC4:CDC28:CR_06960W_A:ACE2:CR_07600W_A:CSM1	6974:51038:60258:6279:45944:90055:31939:30447:72429:6281:48478:42766:32955:30174:45819:16233:76:1901319:44182:727:42307:706:10696:30702:30466:10898:2000221:32210:6267:60303:10570:61186:1905168:10571:9405:33314:70869:72435:51568:723:70887:32297:6348:72428:902:6303:1902845:1900087:18105:31138:45875:1902969:70550:60196:51447:71930:32880:31031:10568:1904537:6369:83:51455:90419:1990139:122:70816:183:1…
44774	mitotic DNA integrity checkpoint	7 out of 125 genes, 5.6%	32 out of 6473 background genes, 0.5%	0.00158	0	ORC1:GIN1:CDC7:RAD9:IPL1:DBF4:CR_03340C_A	6974:60258:6279:45944:6281:48478:31333:44774:76:727:1901673:30466:6267:6302:31571:33314:723:6348:72428:77:18105:34501:31670:1902969:120110:733:10620:7064:98783:90267:6270:1905824:1903380:60903:1903468:1903343:7094:33316:82:1902412:51228:31573:1902977:1901925:90699:30448:33262:45144:31938:10971:6289:34503:71902:1902975:43570:1100:43392:51316
10695	regulation of mitotic spindle pole body separation	4 out of 125 genes, 3.2%	6 out of 6473 background genes, 0.1%	0.0016	0	CDC5:CDH1:CLB2:CDC28	1905786:1902426:45944:30447:72429:1902542:1402:2000060:8361:45819:1901319:44182:45793:46827:42307:706:10696:10898:32210:10697:60303:10570:1905168:10571:1903353:72435:7346:32888:71851:2000220:45737:1902845:1900087:18105:31138:45875:31670:35308:51447:10568:1904537:31031:51455:1904668:1990139:8104:70816:75297:1990758:6370:98783:1900182:51726:1902424:31536:1903380:6468:1903467:1990813:45892:86:190046…
40029	regulation of gene expression, epigenetic	13 out of 125 genes, 10.4%	138 out of 6473 background genes, 2.1%	0.00176	0	SIN3:C1_01000C_A:ORC1:C1_05380C_A:C1_06760C_A:GIN1:C2_10760C_A:ORC3:ZDS1:ORC4:CR_06960W_A:CR_07600W_A:CSM1	6974:51038:31939:30447:6281:48478:42766:30174:16233:76:30702:30466:6267:61186:33314:70869:51568:723:6348:6303:1902969:70550:32880:51455:122:183:43044:7064:6270:27:61408:30010:16575:729:61188:9267:6342:31573:16584:36170:117:33262:31938:16479:71216:10971:70870:34503:36180:6406:1902975:43570:61587:1302:6364:35690
90329	regulation of DNA-dependent DNA replication	8 out of 125 genes, 6.4%	46 out of 6473 background genes, 0.7%	0.00181	0	SIN3:C1_06760C_A:GIN1:CDC7:FKH2:C4_05340W_A:DBF4:CDC28	6974:51038:60258:6279:45944:90055:31939:30447:72429:6281:48478:30174:45819:76:1901319:44182:727:42307:706:10696:30702:30466:10898:2000221:32210:6267:60303:10570:61186:1905168:10571:33314:72435:723:32297:6348:72428:902:6303:1902845:1900087:18105:31138:45875:51447:71930:31031:10568:1904537:6369:90419:1990139:122:70816:10620:31124:6357:1990758:7064:6370:98783:51726:6270:1902424:31536:27:61408:34244:…
1901988	negative regulation of cell cycle phase transition	9 out of 125 genes, 7.2%	62 out of 6473 background genes, 1.0%	0.00199	0	ORC1:CDC7:DBF2:RAD9:CDC14:IPL1:DBF4:CR_03340C_A:CR_05100W_A	6974:60258:6279:45944:31333:32463:44774:2000250:51229:727:71470:280:1901673:1990598:30466:6267:6302:31571:33314:1902854:1904789:72428:44878:35853:42149:77:18105:34501:6915:31670:1902969:910:61167:31031:1902846:6470:51220:22:1403:120110:733:10620:31028:98783:90267:6270:31536:1905824:7052:1903380:1902406:6468:7035:60903:1903468:1903343:7094:33316:82:1902412:51228:31573:1902425:1902977:1901925:90699…
1901991	negative regulation of mitotic cell cycle phase transition	9 out of 125 genes, 7.2%	62 out of 6473 background genes, 1.0%	0.00199	0	ORC1:CDC7:DBF2:RAD9:CDC14:IPL1:DBF4:CR_03340C_A:CR_05100W_A	6974:60258:6279:45944:31333:32463:44774:2000250:51229:727:71470:280:1901673:1990598:30466:6267:6302:31571:33314:1902854:1904789:72428:44878:35853:42149:77:18105:34501:6915:31670:1902969:910:61167:31031:1902846:6470:51220:22:1403:120110:733:10620:31028:98783:90267:6270:31536:1905824:7052:1903380:1902406:6468:7035:60903:1903468:1903343:7094:33316:82:1902412:51228:31573:1902425:1902977:1901925:90699…
75	cell cycle checkpoint	10 out of 125 genes, 8.0%	80 out of 6473 background genes, 1.2%	0.00219	0	ORC1:GIN1:CDC7:DBF2:RAD9:CDC14:IPL1:DBF4:CR_03340C_A:CR_05100W_A	6974:60258:6279:45944:6281:48478:31333:32463:44774:2000250:76:51229:727:71470:280:1901673:1990598:30466:6267:6302:31571:33314:723:1902854:6348:1904789:72428:44878:35853:42149:77:18105:34501:6915:31670:1902969:910:61167:31031:1902846:6470:51220:22:1403:120110:733:10620:7064:31028:98783:90267:6270:31536:1905824:7052:1903380:1902406:6468:7035:60903:1903468:1903343:7094:33316:82:1902412:51228:31573:1…
31110	regulation of microtubule polymerization or depolymerization	5 out of 125 genes, 4.0%	13 out of 6473 background genes, 0.2%	0.00234	0	SPC19:DAM1:DAD2:DAD3:CR_09520C_A	8608:51987:71963:31110:34501:7052:90307:31116:7020
32465	regulation of cytokinesis	7 out of 125 genes, 5.6%	34 out of 6473 background genes, 0.5%	0.00245	0	C1_00570C_A:CDC5:DBF2:CDC14:IPL1:CDC28:ACE2	6974:45944:30447:72429:32463:1902542:1402:32955:45819:44774:2000250:51229:1901319:44182:45793:46827:71470:42307:280:706:1901673:1990598:10696:10898:32210:60303:10570:1905168:10571:9405:1903353:72435:1902854:70887:2000220:1904789:44878:35853:42149:1902845:1900087:18105:34501:31138:45875:31670:910:60196:61167:51447:10568:1904537:1902846:31031:83:51455:1990139:6470:122:8104:51220:1403:120110:70816:1…
9892	negative regulation of metabolic process	24 out of 125 genes, 19.2%	450 out of 6473 background genes, 7.0%	0.00323	0	SIN3:C1_01000C_A:ESP1:ORC1:C1_05380C_A:C1_06760C_A:GIN1:C1_11910W_A:CLB2:SRB9:NCB2:CDC7:C2_10760C_A:FKH2:ORC3:ZDS1:C4_05340W_A:ORC4:RAD52:CDC28:CR_06960W_A:ACE2:CR_07600W_A:CSM1	6974:51038:10947:60258:6279:45944:730:90055:31939:30447:72429:6281:48478:722:42766:32955:71479:30174:45819:16233:76:1901319:44182:6312:727:71033:42307:706:10696:30702:30466:10898:34599:2000221:32210:6267:60303:10570:61186:6508:1905168:10571:9405:33314:70869:72435:51568:7346:723:32888:70887:32297:1990426:6348:72428:902:45737:6303:1902845:1900087:18105:31138:45875:6915:1902969:35308:70550:60196:514…
6275	regulation of DNA replication	8 out of 125 genes, 6.4%	50 out of 6473 background genes, 0.8%	0.0035	0	SIN3:C1_06760C_A:GIN1:CDC7:FKH2:C4_05340W_A:DBF4:CDC28	6974:51038:60258:6279:45944:90055:31939:30447:72429:6281:48478:30174:45819:76:1901319:44182:727:42307:706:10696:30702:30466:10898:2000221:32210:6267:60303:10570:61186:1905168:10571:33314:72435:723:32297:6348:72428:902:6303:1902845:1900087:18105:31138:45875:51447:71930:31031:10568:1904537:6369:90419:1990139:122:70816:10620:31124:6357:1990758:7064:6370:98783:51726:6270:1902424:31536:27:61408:34244:…
51302	regulation of cell division	7 out of 125 genes, 5.6%	36 out of 6473 background genes, 0.6%	0.00369	0	C1_00570C_A:CDC5:DBF2:CDC14:IPL1:CDC28:ACE2	6974:45944:30447:72429:32463:1902542:1402:32955:45819:44774:2000250:51229:1901319:44182:45793:46827:71470:42307:280:706:1901673:1990598:10696:10898:32210:60303:10570:1905168:10571:9405:1903353:72435:1902854:70887:2000220:1904789:44878:35853:42149:1902845:1900087:18105:34501:31138:45875:31670:910:60196:61167:51447:10568:1904537:1902846:31031:83:51455:1990139:6470:122:8104:51220:1403:120110:70816:1…
51316	attachment of spindle microtubules to kinetochore involved in meiotic chromosome segregation	4 out of 125 genes, 3.2%	7 out of 6473 background genes, 0.1%	0.00369	0	CDC5:IPL1:CR_02680W_A:CSM1	30447:1902542:1402:44774:44182:45793:46827:1901673:10696:1903353:2000220:51315:18105:34501:31670:70550:31031:51455:8104:120110:183:98783:90267:1905824:1903380:6468:1990813:7094:33316:1900461:1902412:51228:90268:9267:10458:1902425:36170:1901925:90699:45144:70194:71216:10971:712:35556:34503:36180:7020:90306:45842:51316
50789	regulation of biological process	51 out of 125 genes, 40.8%	1480 out of 6473 background genes, 22.9%	0.00391	0	C1_00570C_A:SIN3:CDC5:C1_01000C_A:ESP1:ORC1:MSB1:SPC19:C1_05380C_A:C1_06760C_A:ERG1:DAM1:GIN1:C1_11910W_A:C1_13560W_A:CDH1:CLB2:SRB9:NCB2:MED1:YAK1:DAD2:CDC7:DBF2:C2_10760C_A:FKH2:ORC3:ZDS1:BAS1:C4_05340W_A:ORC4:RAD9:RAD52:CDC14:IPL1:IQG1:TRS33:DBF4:DAL81:CDC27:CR_02680W_A:CR_03340C_A:CR_05100W_A:CDC28:DAD3:CR_06960W_A:ACE2:CR_07600W_A:ACO1:CR_09520C_A:CSM1	6974:51038:1905786:10947:60258:6279:1902426:737:45944:730:90055:31939:30447:72429:6281:48478:31333:32463:1902542:1402:16239:722:42766:32955:71479:8608:30174:9113:45848:34497:2000060:8361:45819:100036:32187:44774:16233:2000250:76:51229:1901319:44182:45793:51987:6312:727:46827:7155:1080:71033:71470:34629:42307:280:6351:706:1901673:1990598:10696:30702:30466:10898:34599:2000221:32210:6267:6302:10697:…
50794	regulation of cellular process	48 out of 125 genes, 38.4%	1362 out of 6473 background genes, 21.0%	0.00477	0	C1_00570C_A:SIN3:CDC5:C1_01000C_A:ESP1:ORC1:MSB1:SPC19:C1_05380C_A:C1_06760C_A:DAM1:GIN1:C1_13560W_A:CDH1:CLB2:SRB9:NCB2:MED1:YAK1:DAD2:CDC7:DBF2:C2_10760C_A:FKH2:ORC3:ZDS1:BAS1:C4_05340W_A:ORC4:RAD9:RAD52:CDC14:IPL1:IQG1:TRS33:DBF4:DAL81:CDC27:CR_02680W_A:CR_03340C_A:CR_05100W_A:CDC28:DAD3:CR_06960W_A:ACE2:CR_07600W_A:CR_09520C_A:CSM1	6974:51038:1905786:10947:60258:6279:1902426:737:45944:730:90055:31939:30447:72429:6281:48478:31333:32463:1902542:1402:16239:722:42766:32955:71479:8608:30174:9113:45848:34497:2000060:8361:45819:100036:32187:44774:16233:2000250:76:51229:1901319:44182:45793:51987:6312:727:46827:7155:1080:71470:34629:42307:280:6351:706:1901673:1990598:10696:30702:30466:10898:34599:2000221:32210:6267:6302:10697:31571:…
65007	biological regulation	56 out of 125 genes, 44.8%	1711 out of 6473 background genes, 26.4%	0.005	0	C1_00570C_A:SIN3:CDC5:C1_01000C_A:ESP1:ORC1:MSB1:SPC19:C1_05380C_A:GLT1:C1_06760C_A:ERG1:DAM1:GIN1:C1_11910W_A:C1_13560W_A:CDH1:CLB2:SRB9:NCB2:MED1:YAK1:DAD2:CDC7:DBF2:C2_10760C_A:FKH2:ORC3:ZDS1:BAS1:C4_05340W_A:EXO1:ORC4:RAD9:RAD52:CDC14:IPL1:IQG1:TRS33:DBF4:DAL81:CDC27:CR_02680W_A:CR_03230W_A:CR_03340C_A:CR_05100W_A:FDH1:CDC28:DAD3:CR_06960W_A:ACE2:CR_07600W_A:YHB1:ACO1:CR_09520C_A:CSM1	6974:51038:1905786:10947:60258:6279:1902426:737:45944:730:90055:31939:30447:72429:6281:48478:31333:32463:1902542:1402:16239:722:42766:32955:71479:8608:30174:9113:45848:6546:34497:2000060:8361:45819:100036:32187:44774:46210:16233:2000250:76:51229:1901319:44182:45793:51987:6312:727:46827:7155:1080:71033:19676:71470:34629:15671:42307:280:6351:706:1901673:1990598:10696:30702:30466:10898:34599:2000221…
33262	regulation of nuclear cell cycle DNA replication	5 out of 125 genes, 4.0%	15 out of 6473 background genes, 0.2%	0.00531	0	GIN1:CDC7:FKH2:DBF4:CDC28	6974:60258:6279:45944:90055:30447:72429:6281:48478:45819:76:1901319:44182:727:42307:706:10696:30466:10898:2000221:32210:60303:10570:1905168:10571:33314:72435:723:6348:72428:902:1902845:1900087:18105:31138:45875:51447:71930:31031:10568:1904537:6369:90419:1990139:70816:10620:31124:6357:1990758:7064:6370:98783:51726:6270:1902424:31536:34244:71406:6338:1903380:6468:1903467:60903:1903468:45892:86:1903…
1902423	regulation of attachment of mitotic spindle microtubules to kinetochore	3 out of 125 genes, 2.4%	3 out of 6473 background genes, 0.0%	0.00585	0	CDC5:CDC14:CDC28	6974:45944:30447:72429:1902542:1402:45819:51229:1901319:44182:45793:46827:71470:42307:706:1990598:10696:10898:32210:60303:10570:1905168:10571:1903353:72435:2000220:1904789:44878:35853:42149:1902845:1900087:18105:34501:31138:45875:31670:51447:10568:1904537:1902846:31031:51455:1990139:6470:8104:1403:70816:1990758:6370:98783:51726:1902424:31536:1903380:1902406:6468:1903467:1990813:45892:86:1900461:8…
31536	positive regulation of exit from mitosis	3 out of 125 genes, 2.4%	3 out of 6473 background genes, 0.0%	0.00585	0	ESP1:CDC14:CDC28	6974:45944:72429:45819:51229:1901319:71470:42307:706:10696:1990598:10898:32210:60303:10570:6508:1905168:10571:72435:32888:1904789:44878:35853:42149:1902845:1900087:18105:34501:31138:45875:6915:51447:10568:1904537:31031:1902846:1990139:6470:1403:70816:1990758:6370:98783:51726:1902424:31536:1903380:1902406:6468:1903467:45892:86:32515:82:7130:2001033:1902425:920:30448:1990820:10971:51446:18107:70:19…
90235	regulation of metaphase plate congression	3 out of 125 genes, 2.4%	3 out of 6473 background genes, 0.0%	0.00585	0	CDC5:CDC14:CDC28	6974:45944:30447:72429:1902542:1402:45819:51229:1901319:44182:45793:46827:71470:42307:706:1990598:10696:10898:32210:60303:10570:1905168:10571:1903353:72435:2000220:1904789:44878:35853:42149:1902845:1900087:18105:34501:31138:45875:31670:51447:10568:1904537:1902846:31031:51455:1990139:6470:8104:1403:70816:1990758:6370:98783:51726:1902424:31536:1903380:1902406:6468:1903467:1990813:45892:86:1900461:8…
44283	small molecule biosynthetic process	18 out of 125 genes, 14.4%	285 out of 6473 background genes, 4.4%	0.00632	0	ERG2:EHT1:GLT1:ERG1:ERG7:ERG24:RHR2:ERG6:NCP1:GDH3:ERG26:YNK1:HAM1:MCR1:ARG1:ERG27:CPA2:CR_09100C_A	6974:51792:30447:6165:6071:19676:71470:6228:34599:9405:61508:70887:6631:46777:6537:6979:36187:6526:36164:42821:6183:6241:51668:6114:44409:6696:9217:51793:9267:44011:36171:36170:30448:97054:71216:55114:51211:36180:9213:35690
30174	regulation of DNA-dependent DNA replication initiation	6 out of 125 genes, 4.8%	26 out of 6473 background genes, 0.4%	0.00642	0	SIN3:C1_06760C_A:FKH2:C4_05340W_A:DBF4:CDC28	51038:60258:6279:45944:90055:31939:30447:72429:30174:45819:1901319:44182:42307:706:10696:30702:10898:2000221:32210:6267:60303:10570:61186:1905168:10571:33314:72435:32297:902:6303:1902845:1900087:18105:31138:45875:51447:71930:31031:10568:1904537:6369:90419:1990139:122:70816:31124:6357:1990758:6370:98783:51726:6270:1902424:31536:27:61408:34244:71406:6338:1903380:6468:1903467:60903:1903468:45892:86:…
1902099	regulation of metaphase/anaphase transition of cell cycle	7 out of 125 genes, 5.6%	39 out of 6473 background genes, 0.6%	0.00648	0	CDC5:CDH1:C4_05340W_A:IPL1:CR_02680W_A:CR_05100W_A:CDC28	1905786:1902426:45944:30447:72429:1902542:1402:2000060:8361:45819:44774:1901319:44182:45793:46827:42307:706:1901673:10696:10898:32210:10697:60303:10570:1905168:10571:1903353:72435:71851:2000220:32297:51315:1902845:1900087:18105:34501:31138:45875:6915:31670:51447:10568:1904537:31031:51455:1904668:1990139:8104:22:120110:70816:1990758:6370:98783:90267:51726:1902424:31536:1905824:1903380:6468:1903467…
30071	regulation of mitotic metaphase/anaphase transition	7 out of 125 genes, 5.6%	39 out of 6473 background genes, 0.6%	0.00648	0	CDC5:CDH1:C4_05340W_A:IPL1:CR_02680W_A:CR_05100W_A:CDC28	1905786:1902426:45944:30447:72429:1902542:1402:2000060:8361:45819:44774:1901319:44182:45793:46827:42307:706:1901673:10696:10898:32210:10697:60303:10570:1905168:10571:1903353:72435:71851:2000220:32297:51315:1902845:1900087:18105:34501:31138:45875:6915:31670:51447:10568:1904537:31031:51455:1904668:1990139:8104:22:120110:70816:1990758:6370:98783:90267:51726:1902424:31536:1905824:1903380:6468:1903467…
31112	positive regulation of microtubule polymerization or depolymerization	4 out of 125 genes, 3.2%	8 out of 6473 background genes, 0.1%	0.00728	0	SPC19:DAM1:DAD2:DAD3	8608:51987:7052:31116
31116	positive regulation of microtubule polymerization	4 out of 125 genes, 3.2%	8 out of 6473 background genes, 0.1%	0.00728	0	SPC19:DAM1:DAD2:DAD3	8608:51987:7052:31116
51716	cellular response to stimulus	44 out of 125 genes, 35.2%	1216 out of 6473 background genes, 18.8%	0.0074	0	ERG2:SIN3:CDC5:ESP1:C1_05380C_A:C1_06760C_A:ERG1:DAK2:GIN1:C1_11910W_A:C1_13560W_A:CLB2:SRB9:NCB2:YAK1:CDC7:DBF2:ERG24:FCY21:RHR2:FKH2:C3_00830C_A:ERG6:GFA1:C3_02760C_A:ORC3:NCP1:EXO1:RAD9:YNK1:RAD52:CDC14:MCR1:IPL1:IQG1:DAL81:ERG27:CR_03340C_A:CR_05010W_A:CDC28:ACE2:CR_07600W_A:YHB1:CR_09670C_A	6974:51038:10947:60258:6279:737:45944:730:90055:31939:30447:72429:6281:48478:31333:32463:1902542:1402:722:42766:32955:71479:72530:30174:45848:6165:45819:32187:44774:46210:16233:6038:2000250:76:51229:1901319:44182:45793:6312:727:6071:46827:1080:71033:71470:15671:42307:280:6351:706:1901673:1990598:10696:30702:30466:10898:6228:34599:2000221:32210:6267:6302:31571:60303:1903477:10570:97237:71574:61186…
10629	negative regulation of gene expression	20 out of 125 genes, 16.0%	348 out of 6473 background genes, 5.4%	0.00779	0	SIN3:C1_01000C_A:ORC1:C1_05380C_A:C1_06760C_A:GIN1:C1_11910W_A:SRB9:NCB2:CDC7:C2_10760C_A:FKH2:ORC3:ZDS1:ORC4:CDC28:CR_06960W_A:ACE2:CR_07600W_A:CSM1	6974:51038:60258:6279:45944:90055:31939:30447:72429:6281:48478:42766:32955:30174:45819:16233:76:1901319:44182:727:71033:42307:706:10696:30702:30466:10898:2000221:32210:6267:60303:10570:61186:1905168:10571:9405:33314:70869:72435:51568:723:70887:6348:72428:902:6303:1902845:1900087:18105:31138:45875:1902969:70550:60196:51447:71930:32880:31031:10568:1904537:6369:83:51455:90419:1990139:122:70816:183:1…
65004	protein-DNA complex assembly	10 out of 125 genes, 8.0%	93 out of 6473 background genes, 1.4%	0.00872	0	C1_01000C_A:ORC1:C1_06760C_A:NCB2:C2_10760C_A:ORC3:ORC4:RAD52:CR_03340C_A:CR_06960W_A	10947:730:30447:6281:31333:722:71479:30174:44182:727:6312:30702:30466:34599:6267:9405:33314:51568:723:1990426:6348:1902969:45002:6277:122:733:43618:7533:7064:6270:61408:27:724:36166:6301:1902977:51123:45898:31938:2001038:34644:1900429:709:1902975:6364:43392:35690
10965	regulation of mitotic sister chromatid separation	7 out of 125 genes, 5.6%	41 out of 6473 background genes, 0.6%	0.00918	0	CDC5:CDH1:C4_05340W_A:IPL1:CR_02680W_A:CR_05100W_A:CDC28	1905786:1902426:45944:30447:72429:1902542:1402:2000060:8361:45819:44774:1901319:44182:45793:46827:42307:706:1901673:10696:10898:32210:10697:60303:10570:1905168:10571:1903353:72435:71851:2000220:32297:51315:1902845:1900087:18105:34501:31138:45875:6915:31670:51447:10568:1904537:31031:51455:1904668:1990139:8104:22:120110:70816:1990758:6370:98783:90267:51726:1902424:31536:1905824:1903380:6468:1903467…
1905818	regulation of chromosome separation	7 out of 125 genes, 5.6%	41 out of 6473 background genes, 0.6%	0.00918	0	CDC5:CDH1:C4_05340W_A:IPL1:CR_02680W_A:CR_05100W_A:CDC28	1905786:1902426:45944:30447:72429:1902542:1402:2000060:8361:45819:44774:1901319:44182:45793:46827:42307:706:1901673:10696:10898:32210:10697:60303:10570:1905168:10571:1903353:72435:71851:2000220:32297:51315:1902845:1900087:18105:34501:31138:45875:6915:31670:51447:10568:1904537:31031:51455:1904668:1990139:8104:22:120110:70816:1990758:6370:98783:90267:51726:1902424:31536:1905824:1903380:6468:1903467…
50896	response to stimulus	48 out of 125 genes, 38.4%	1398 out of 6473 background genes, 21.6%	0.01009	0	ERG2:SIN3:CDC5:ESP1:C1_05380C_A:ANT1:C1_06760C_A:ERG1:DAK2:GIN1:C1_11910W_A:C1_13560W_A:CLB2:SRB9:NCB2:YAK1:CDC7:DBF2:ERG24:FCY21:RHR2:FKH2:C3_00830C_A:ERG6:GFA1:C3_02760C_A:ORC3:NCP1:EXO1:RAD9:YNK1:PSD2:RAD52:CDC14:MCR1:IPL1:IQG1:DAL81:ERG27:CR_03270W_A:CR_03340C_A:CR_05010W_A:CDC28:ACE2:CR_07600W_A:YHB1:ACO1:CR_09670C_A	6974:51038:10947:60258:6279:737:45944:730:90055:31939:30447:72429:6281:48478:31333:32463:1902542:1402:722:42766:32955:71479:72530:30174:45848:15867:6165:45819:32187:44774:46210:16233:6038:2000250:76:51229:1901319:44182:45793:6312:727:6071:46827:1080:71033:71470:15671:42307:280:6351:706:1901673:1990598:10696:30702:30466:10898:6228:34599:2000221:32210:6267:6302:31571:60303:1903477:10570:97237:71574…
10972	negative regulation of G2/M transition of mitotic cell cycle	6 out of 125 genes, 4.8%	28 out of 6473 background genes, 0.4%	0.01018	0	ORC1:CDC7:DBF2:CDC14:DBF4:CR_03340C_A	6974:60258:6279:31333:32463:2000250:51229:727:71470:280:1990598:30466:6267:33314:1902854:1904789:72428:44878:35853:42149:18105:34501:1902969:910:61167:31031:1902846:6470:51220:1403:733:10620:31028:98783:6270:31536:7052:1902406:6468:7035:60903:1903468:1903343:82:1902425:1902977:920:30448:1902817:31938:71902:1990975:1902975:278:1100:43392:7096
1902412	regulation of mitotic cytokinesis	6 out of 125 genes, 4.8%	28 out of 6473 background genes, 0.4%	0.01018	0	CDC5:DBF2:CDC14:IPL1:CDC28:ACE2	6974:45944:30447:72429:32463:1902542:1402:32955:45819:44774:2000250:51229:1901319:44182:45793:46827:71470:42307:280:706:1901673:1990598:10696:10898:32210:60303:10570:1905168:10571:9405:1903353:72435:1902854:70887:2000220:1904789:44878:35853:42149:1902845:1900087:18105:34501:31138:45875:31670:910:60196:61167:51447:10568:1904537:1902846:31031:83:51455:1990139:6470:122:8104:51220:1403:120110:70816:1…
1902750	negative regulation of cell cycle G2/M phase transition	6 out of 125 genes, 4.8%	28 out of 6473 background genes, 0.4%	0.01018	0	ORC1:CDC7:DBF2:CDC14:DBF4:CR_03340C_A	6974:60258:6279:31333:32463:2000250:51229:727:71470:280:1990598:30466:6267:33314:1902854:1904789:72428:44878:35853:42149:18105:34501:1902969:910:61167:31031:1902846:6470:51220:1403:733:10620:31028:98783:6270:31536:7052:1902406:6468:7035:60903:1903468:1903343:82:1902425:1902977:920:30448:1902817:31938:71902:1990975:1902975:278:1100:43392:7096
50000	chromosome localization	6 out of 125 genes, 4.8%	28 out of 6473 background genes, 0.4%	0.01018	0	CLB2:NUF2:CDC14:IPL1:CR_02680W_A:CDC28	6974:45944:30447:72429:45819:44774:51229:1901319:71470:42307:706:1901673:1990598:10696:10898:32210:60303:10570:1905168:10571:72435:7346:32888:51315:1904789:44878:35853:45737:42149:1902845:1900087:18105:34501:31138:45875:31670:35308:51447:10568:1904537:31031:1902846:51455:1990139:6470:1403:120110:70816:75297:1990758:6370:98783:1900182:90267:51726:1902424:31536:1905824:1903380:1902406:6468:1903467:…
51781	positive regulation of cell division	5 out of 125 genes, 4.0%	17 out of 6473 background genes, 0.3%	0.0106	0	CDC5:DBF2:CDC14:CDC28:ACE2	6974:45944:30447:72429:32463:1902542:1402:32955:45819:2000250:51229:1901319:44182:45793:46827:71470:42307:280:706:1990598:10696:10898:32210:60303:10570:1905168:10571:9405:1903353:72435:1902854:70887:2000220:1904789:44878:35853:42149:1902845:1900087:18105:34501:31138:45875:31670:910:60196:61167:51447:10568:1904537:1902846:31031:83:51455:1990139:6470:122:8104:51220:1403:70816:1990758:6370:31028:987…
1903463	regulation of mitotic cell cycle DNA replication	4 out of 125 genes, 3.2%	9 out of 6473 background genes, 0.1%	0.0129	0.0001	CDC7:FKH2:DBF4:CDC28	60258:6279:45944:90055:30447:72429:45819:1901319:44182:727:42307:706:10696:10898:2000221:32210:60303:10570:1905168:10571:33314:72435:72428:902:1902845:1900087:18105:31138:45875:51447:71930:31031:10568:1904537:6369:90419:1990139:70816:10620:31124:6357:1990758:6370:98783:51726:6270:1902424:31536:34244:71406:6338:1903380:6468:1903467:60903:1903468:45892:86:1903343:82:7130:2001033:30448:31938:1990820…
76	DNA replication checkpoint	5 out of 125 genes, 4.0%	18 out of 6473 background genes, 0.3%	0.01446	0.0001	ORC1:GIN1:CDC7:DBF4:CR_03340C_A	6974:60258:6279:6281:48478:31333:76:727:30466:6267:33314:723:6348:72428:18105:1902969:733:10620:7064:6270:60903:1903468:1903343:82:31573:1902977:33262:31938:71902:1902975:43570:1100:43392
6302	double-strand break repair	10 out of 125 genes, 8.0%	99 out of 6473 background genes, 1.5%	0.01526	0.0001	SIN3:C1_05380C_A:C1_13560W_A:CDC7:EXO1:RAD9:RAD52:CR_03340C_A:CDC28:CR_07600W_A	51038:10947:60258:6279:737:45944:730:31939:30447:72429:6281:31333:722:42766:71479:30174:45819:16233:1901319:44182:6312:727:42307:706:10696:30702:30466:10898:34599:32210:6302:31571:60303:10570:61186:1905168:10571:9405:33314:70869:31292:72435:723:1905779:1990426:6348:72428:6303:1902845:77:1900087:18105:31138:45875:51447:31031:10568:1904537:45002:31860:6277:1990139:122:70816:733:183:10620:43044:1990…
1902969	mitotic DNA replication	6 out of 125 genes, 4.8%	30 out of 6473 background genes, 0.5%	0.01555	0.0001	ORC1:CDC7:C3_00830C_A:RAD52:CR_03340C_A:CR_06960W_A	10947:60258:6279:730:30447:6281:31333:722:71479:44182:6312:727:30466:34599:6267:9405:33314:723:1990426:35753:1903461:72428:6266:18105:1902969:45002:6277:733:10620:7533:7064:6270:6284:724:36166:6301:1903343:82:1902977:71897:31938:6310:6289:34644:1900429:709:1902975:1100:43392:35690
71824	protein-DNA complex subunit organization	12 out of 125 genes, 9.6%	145 out of 6473 background genes, 2.2%	0.01693	0.0001	C1_01000C_A:ORC1:C1_06760C_A:NCB2:C2_10760C_A:ORC3:ORC4:RAD52:CR_03340C_A:CDC28:CR_06960W_A:CR_07600W_A	10947:45944:730:30447:72429:6281:31333:722:42766:71479:30174:45819:1901319:44182:727:6312:42307:706:10696:30702:30466:10898:34599:32210:6267:60303:10570:1905168:10571:9405:33314:70869:72435:51568:723:1990426:6348:1902845:1900087:18105:31138:45875:1902969:51447:31031:10568:1904537:45002:6277:1990139:122:70816:733:183:43044:43618:1990758:7533:7064:6370:98783:51726:6270:1902424:31536:61408:27:190338…
31570	DNA integrity checkpoint	7 out of 125 genes, 5.6%	45 out of 6473 background genes, 0.7%	0.01738	0.0001	ORC1:GIN1:CDC7:RAD9:IPL1:DBF4:CR_03340C_A	6974:60258:6279:45944:6281:48478:31333:44774:76:727:1901673:30466:6267:6302:31571:33314:723:6348:72428:77:18105:34501:31670:1902969:120110:733:10620:7064:98783:90267:6270:1905824:1903380:60903:1903468:1903343:7094:33316:82:1902412:51228:31573:1902977:1901925:90699:30448:33262:45144:31938:10971:6289:34503:71902:1902975:43570:1100:43392:51316
1902101	positive regulation of metaphase/anaphase transition of cell cycle	4 out of 125 genes, 3.2%	10 out of 6473 background genes, 0.2%	0.02119	0.0001	CDC5:CDH1:C4_05340W_A:CDC28	1905786:1902426:45944:30447:72429:1902542:1402:2000060:8361:45819:1901319:44182:45793:46827:42307:706:10696:10898:32210:10697:60303:10570:1905168:10571:1903353:72435:71851:2000220:32297:1902845:1900087:18105:31138:45875:31670:51447:10568:1904537:31031:51455:1904668:1990139:8104:70816:1990758:6370:98783:51726:1902424:31536:1903380:6468:1903467:1990813:45892:86:16567:1900461:82:9267:7130:2001033:10…
31113	regulation of microtubule polymerization	4 out of 125 genes, 3.2%	10 out of 6473 background genes, 0.2%	0.02119	0.0001	SPC19:DAM1:DAD2:DAD3	8608:51987:7052:31116
45842	positive regulation of mitotic metaphase/anaphase transition	4 out of 125 genes, 3.2%	10 out of 6473 background genes, 0.2%	0.02119	0.0001	CDC5:CDH1:C4_05340W_A:CDC28	1905786:1902426:45944:30447:72429:1902542:1402:2000060:8361:45819:1901319:44182:45793:46827:42307:706:10696:10898:32210:10697:60303:10570:1905168:10571:1903353:72435:71851:2000220:32297:1902845:1900087:18105:31138:45875:31670:51447:10568:1904537:31031:51455:1904668:1990139:8104:70816:1990758:6370:98783:51726:1902424:31536:1903380:6468:1903467:1990813:45892:86:16567:1900461:82:9267:7130:2001033:10…
10696	positive regulation of mitotic spindle pole body separation	3 out of 125 genes, 2.4%	4 out of 6473 background genes, 0.1%	0.0231	0.0001	CDC5:CLB2:CDC28	45944:30447:72429:1902542:1402:45819:1901319:44182:45793:46827:42307:706:10696:10898:32210:60303:10570:1905168:10571:1903353:72435:7346:32888:2000220:45737:1902845:1900087:18105:31138:45875:31670:35308:51447:10568:1904537:31031:51455:1990139:8104:70816:75297:1990758:6370:98783:1900182:51726:1902424:31536:1903380:6468:1903467:1990813:45892:86:1900461:82:9267:7130:2001033:79:10458:1902425:36170:304…
44087	regulation of cellular component biogenesis	12 out of 125 genes, 9.6%	153 out of 6473 background genes, 2.4%	0.02902	0.0001	CDC5:SPC19:DAM1:NCB2:DAD2:DBF2:CDC14:IPL1:CR_03340C_A:CDC28:DAD3:ACE2	6974:45944:30447:72429:31333:32463:1902542:1402:32955:8608:45819:44774:2000250:51229:1901319:44182:45793:51987:727:46827:71470:42307:280:706:1901673:1990598:10696:10898:32210:60303:10570:1905168:10571:9405:33314:1903353:72435:1902854:70887:2000220:1904789:44878:35853:42149:1902845:1900087:18105:34501:31138:45875:31670:910:60196:61167:51447:10568:1904537:1902846:31031:83:51455:1990139:6470:122:810…
48522	positive regulation of cellular process	27 out of 125 genes, 21.6%	619 out of 6473 background genes, 9.6%	0.03082	0.0001	SIN3:CDC5:ESP1:SPC19:DAM1:C1_13560W_A:CDH1:CLB2:SRB9:NCB2:DAD2:CDC7:DBF2:FKH2:ZDS1:BAS1:C4_05340W_A:RAD9:CDC14:IPL1:TRS33:DBF4:DAL81:CR_02680W_A:CDC28:DAD3:ACE2	6974:51038:1905786:60258:6279:1902426:737:45944:90055:31939:30447:72429:32463:1902542:1402:16239:32955:8608:30174:9113:45848:34497:2000060:8361:45819:100036:44774:2000250:51229:1901319:44182:45793:51987:727:46827:1080:71470:34629:42307:280:6351:706:1901673:1990598:10696:30702:10898:2000221:32210:6302:10697:31571:60303:10570:61186:6508:1905168:10571:9405:33314:31292:1903353:72435:7346:1902854:3288…
16043	cellular component organization	48 out of 125 genes, 38.4%	1456 out of 6473 background genes, 22.5%	0.03128	0.0001	SIN3:CDC5:C1_01000C_A:ESP1:ORC1:SPC19:C1_05380C_A:ANT1:C1_06760C_A:C1_07360W_A:DAM1:GIN1:C1_11910W_A:C1_13560W_A:CDH1:CLB2:NCB2:DAD2:DBF2:C2_10760C_A:FKH2:C3_00830C_A:ORC3:ASK1:DUO1:ZDS1:SPC34:EXO1:NUF2:ORC4:RAD52:CDC14:IPL1:IQG1:TRS33:CDC27:CR_02680W_A:MLC1:CR_03340C_A:CR_05100W_A:CDC28:DAD3:CR_06960W_A:ACE2:CR_07600W_A:ACO1:CR_09520C_A:CSM1	6974:51038:1905786:10947:1902426:737:45944:730:90055:31939:30447:72429:6281:48478:31333:32463:1902542:1402:16239:722:42766:32955:71479:8608:30174:15867:34497:2000060:8361:45819:32187:44774:16233:2000250:76:51229:1901319:44182:45793:51987:727:6312:46827:71033:71470:34629:42307:280:706:1901673:1990598:10696:30702:30466:10898:34599:2000221:32210:6267:10697:60303:1903477:10570:71574:61186:6508:190516…
1901891	regulation of cell septum assembly	5 out of 125 genes, 4.0%	21 out of 6473 background genes, 0.3%	0.03278	0.0001	CDC5:DBF2:CDC14:CDC28:ACE2	6974:45944:30447:72429:32463:1902542:1402:32955:45819:2000250:51229:1901319:44182:45793:46827:71470:42307:280:706:1990598:10696:10898:32210:60303:10570:1905168:10571:9405:1903353:72435:1902854:70887:2000220:1904789:44878:35853:42149:1902845:1900087:18105:34501:31138:45875:31670:910:60196:61167:51447:10568:1904537:1902846:31031:83:51455:1990139:6470:122:8104:51220:1403:70816:1990758:6370:31028:987…
7020	microtubule nucleation	4 out of 125 genes, 3.2%	11 out of 6473 background genes, 0.2%	0.0328	0.0001	C1_07360W_A:NUF2:CR_02680W_A:CR_09520C_A	71963:31110:51315:34501:51455:7052:90307:90268:7020
44089	positive regulation of cellular component biogenesis	8 out of 125 genes, 6.4%	69 out of 6473 background genes, 1.1%	0.04011	0.0001	CDC5:SPC19:DAM1:DAD2:DBF2:CDC14:CDC28:DAD3	6974:45944:30447:72429:32463:1902542:1402:8608:45819:2000250:51229:1901319:44182:45793:51987:46827:71470:42307:280:706:1990598:10696:10898:32210:60303:10570:1905168:10571:1903353:72435:1902854:2000220:1904789:44878:35853:42149:1902845:1900087:18105:34501:31138:45875:31670:910:61167:51447:10568:1904537:1902846:31031:51455:1990139:6470:8104:51220:1403:70816:1990758:6370:31028:98783:51726:1902424:31…
45143	homologous chromosome segregation	5 out of 125 genes, 4.0%	22 out of 6473 background genes, 0.3%	0.04177	0.0001	CDC5:IPL1:CR_02680W_A:CDC28:CSM1	45944:30447:72429:1902542:1402:45819:44774:1901319:44182:45793:46827:42307:706:1901673:10696:10898:32210:60303:10570:1905168:10571:1903353:72435:2000220:51315:1902845:1900087:18105:34501:31138:45875:31670:70550:51447:10568:1904537:31031:51455:1990139:8104:120110:70816:183:1990758:6370:98783:90267:51726:1902424:31536:1905824:1903380:6468:1903467:1990813:45892:86:7094:33316:1900461:82:1902412:51228…
19219	regulation of nucleobase-containing compound metabolic process	30 out of 125 genes, 24.0%	742 out of 6473 background genes, 11.5%	0.0441	0.0001	SIN3:CDC5:C1_01000C_A:ORC1:MSB1:C1_05380C_A:C1_06760C_A:GIN1:C1_13560W_A:CLB2:SRB9:NCB2:MED1:CDC7:C2_10760C_A:FKH2:ORC3:ZDS1:BAS1:C4_05340W_A:ORC4:RAD9:RAD52:DBF4:DAL81:CDC28:CR_06960W_A:ACE2:CR_07600W_A:CSM1	6974:51038:10947:60258:6279:737:45944:730:90055:31939:30447:72429:6281:48478:1902542:1402:722:42766:32955:71479:30174:9113:45848:45819:100036:16233:76:1901319:44182:45793:6312:727:46827:7155:1080:42307:6351:706:10696:30702:30466:10898:34599:2000221:32210:6267:6302:31571:60303:10570:61186:1905168:10571:9405:33314:70869:31292:1903353:72435:51568:7346:723:32888:70887:1905779:2000220:32297:1990426:63…
6974	cellular response to DNA damage stimulus	16 out of 125 genes, 12.8%	270 out of 6473 background genes, 4.2%	0.04633	0.0001	SIN3:C1_05380C_A:GIN1:C1_11910W_A:C1_13560W_A:CDC7:C3_00830C_A:EXO1:RAD9:YNK1:RAD52:CDC14:CR_03340C_A:CR_05010W_A:CDC28:CR_07600W_A	6974:51038:10947:60258:6279:737:45944:730:31939:30447:72429:6281:48478:31333:722:42766:71479:30174:6165:45819:16233:76:51229:1901319:44182:6312:727:71033:71470:42307:706:10696:1990598:30702:30466:10898:6228:34599:32210:6302:31571:60303:10570:61186:1905168:10571:9405:33314:70869:61508:31292:72435:723:1905779:1990426:35753:6348:1904789:1903461:72428:6266:44878:35853:46777:42149:6303:1902845:77:6979…
31031	positive regulation of septation initiation signaling	3 out of 125 genes, 2.4%	5 out of 6473 background genes, 0.1%	0.05693	0.0001	CDC5:CDC14:CDC28	6974:45944:30447:72429:1902542:1402:45819:51229:1901319:44182:45793:46827:71470:42307:706:1990598:10696:10898:32210:60303:10570:1905168:10571:1903353:72435:2000220:1904789:44878:35853:42149:1902845:1900087:18105:34501:31138:45875:31670:51447:10568:1904537:1902846:31031:51455:1990139:6470:8104:1403:70816:1990758:6370:98783:51726:1902424:31536:1903380:1902406:6468:1903467:1990813:45892:86:1900461:8…
72414	response to mitotic cell cycle checkpoint signaling	3 out of 125 genes, 2.4%	5 out of 6473 background genes, 0.1%	0.05693	0.0001	CDC14:IPL1:CDC28	6974:45944:72429:45819:44774:51229:1901319:71470:42307:706:1901673:10696:1990598:10898:32210:60303:10570:1905168:10571:72435:1904789:44878:35853:42149:1902845:1900087:18105:34501:31138:45875:31670:51447:10568:1904537:31031:1902846:1990139:6470:1403:120110:70816:1990758:6370:98783:90267:51726:1902424:31536:1905824:1903380:1902406:6468:1903467:45892:86:7094:33316:82:1902412:51228:7130:2001033:19024…
48518	positive regulation of biological process	28 out of 125 genes, 22.4%	678 out of 6473 background genes, 10.5%	0.05748	0.0001	SIN3:CDC5:ESP1:SPC19:DAM1:C1_13560W_A:CDH1:CLB2:SRB9:NCB2:DAD2:CDC7:DBF2:FKH2:ZDS1:BAS1:C4_05340W_A:RAD9:CDC14:IPL1:TRS33:DBF4:DAL81:CR_02680W_A:CDC28:DAD3:ACE2:ACO1	6974:51038:1905786:60258:6279:1902426:737:45944:90055:31939:30447:72429:32463:1902542:1402:16239:32955:8608:30174:9113:45848:34497:2000060:8361:45819:100036:44774:2000250:51229:1901319:44182:45793:51987:727:46827:1080:71470:34629:42307:280:6351:706:1901673:1990598:10696:30702:10898:2000221:32210:6302:10697:31571:60303:10570:61186:6508:1905168:10571:9405:33314:31292:1903353:72435:7346:1902854:3288…
51052	regulation of DNA metabolic process	10 out of 125 genes, 8.0%	119 out of 6473 background genes, 1.8%	0.07526	0.0001	SIN3:C1_06760C_A:GIN1:CLB2:CDC7:FKH2:C4_05340W_A:RAD52:DBF4:CDC28	6974:51038:10947:60258:6279:45944:730:90055:31939:30447:72429:6281:48478:722:71479:30174:45819:76:1901319:44182:6312:727:42307:706:10696:30702:30466:10898:34599:2000221:32210:6267:60303:10570:61186:1905168:10571:9405:33314:72435:7346:723:32888:32297:1990426:6348:72428:902:45737:6303:1902845:1900087:18105:31138:45875:35308:51447:71930:31031:10568:1904537:6369:45002:6277:90419:1990139:122:70816:733…
1903436	regulation of mitotic cytokinetic process	5 out of 125 genes, 4.0%	25 out of 6473 background genes, 0.4%	0.08046	0.0001	CDC5:DBF2:CDC14:CDC28:ACE2	6974:45944:30447:72429:32463:1902542:1402:32955:45819:2000250:51229:1901319:44182:45793:46827:71470:42307:280:706:1990598:10696:10898:32210:60303:10570:1905168:10571:9405:1903353:72435:1902854:70887:2000220:1904789:44878:35853:42149:1902845:1900087:18105:34501:31138:45875:31670:910:60196:61167:51447:10568:1904537:1902846:31031:83:51455:1990139:6470:122:8104:51220:1403:70816:1990758:6370:31028:987…
32954	regulation of cytokinetic process	5 out of 125 genes, 4.0%	25 out of 6473 background genes, 0.4%	0.08046	0.0001	CDC5:DBF2:CDC14:CDC28:ACE2	6974:45944:30447:72429:32463:1902542:1402:32955:45819:2000250:51229:1901319:44182:45793:46827:71470:42307:280:706:1990598:10696:10898:32210:60303:10570:1905168:10571:9405:1903353:72435:1902854:70887:2000220:1904789:44878:35853:42149:1902845:1900087:18105:34501:31138:45875:31670:910:60196:61167:51447:10568:1904537:1902846:31031:83:51455:1990139:6470:122:8104:51220:1403:70816:1990758:6370:31028:987…
1901893	positive regulation of cell septum assembly	4 out of 125 genes, 3.2%	14 out of 6473 background genes, 0.2%	0.09513	0.0001	CDC5:DBF2:CDC14:CDC28	6974:45944:30447:72429:32463:1902542:1402:45819:2000250:51229:1901319:44182:45793:46827:71470:42307:280:706:1990598:10696:10898:32210:60303:10570:1905168:10571:1903353:72435:1902854:2000220:1904789:44878:35853:42149:1902845:1900087:18105:34501:31138:45875:31670:910:61167:51447:10568:1904537:1902846:31031:51455:1990139:6470:8104:51220:1403:70816:1990758:6370:31028:98783:51726:1902424:31536:7052:19…
33314	mitotic DNA replication checkpoint	4 out of 125 genes, 3.2%	14 out of 6473 background genes, 0.2%	0.09513	0.0001	ORC1:CDC7:DBF4:CR_03340C_A	60258:6279:31333:727:30466:6267:33314:72428:18105:1902969:733:10620:6270:60903:1903468:1903343:82:1902977:31938:71902:1902975:1100:43392
34501	protein localization to kinetochore	4 out of 125 genes, 3.2%	14 out of 6473 background genes, 0.2%	0.09513	0.0001	CDC14:IPL1:CR_02680W_A:CR_09520C_A	6974:44774:51229:71470:1901673:1990598:71963:31110:51315:1904789:44878:35853:42149:18105:34501:31670:31031:1902846:51455:6470:1403:120110:98783:90267:31536:1905824:7052:1903380:1902406:7094:33316:90307:1902412:51228:90268:1902425:1901925:90699:920:30448:45144:10971:34503:1990975:7020:278:51316:7096
46785	microtubule polymerization	4 out of 125 genes, 3.2%	14 out of 6473 background genes, 0.2%	0.09513	0.0001	C1_07360W_A:NUF2:CR_02680W_A:CR_09520C_A	71963:31110:51315:34501:51455:7052:90307:90268:7020
6281	DNA repair	14 out of 125 genes, 11.2%	228 out of 6473 background genes, 3.5%	0.09577	0.0001	SIN3:C1_05380C_A:GIN1:C1_11910W_A:C1_13560W_A:CDC7:C3_00830C_A:EXO1:RAD9:RAD52:CR_03340C_A:CR_05010W_A:CDC28:CR_07600W_A	6974:51038:10947:60258:6279:737:45944:730:31939:30447:72429:6281:48478:31333:722:42766:71479:30174:45819:16233:76:1901319:44182:6312:727:71033:42307:706:10696:30702:30466:10898:34599:32210:6302:31571:60303:10570:61186:1905168:10571:9405:33314:70869:31292:72435:723:1905779:1990426:35753:6348:1903461:72428:6266:6303:1902845:77:1900087:18105:31138:45875:51447:31031:10568:1904537:45002:31860:6277:199…
