# Supplementary material for: Proteins that physically interact with the phosphatase Cdc14 in Candida albicans have diverse roles in the cell cycle
Source: Sci Rep. 2019 Apr 18;9:6258. doi: 10.1038/s41598-019-42530-1 (PMC6472416; doi:10.1038/s41598-019-42530-1)
Supplement: Supplementary file 4 — Dataset 4 [file 41598_2019_42530_MOESM4_ESM.xls]

## Sheet: Sheet1
	Protein ID	Gene name	Yeast	Hyphae	Optimal Motif
106	orf19.652	orf19.652	+	+	8
1	orf19.1133	MSB1		+	7
93	orf19.6049	orf19.6049	+	+	7
94	orf19.6124	ACE2	+	+	7
107	orf19.6536	IQG1	+		6
17	orf19.2084	CDH1	+	+	5
20	orf19.2389	orf19.2389	+		5
26	orf19.2684	orf19.2684	+	+	5
54	orf19.3823	ZDS1	+		5
85	orf19.557	orf19.557	+		5
103	orf19.643	orf19.643		+	5
67	orf19.4275	RAD9	+	+	4
71	orf19.4675	ASK1	+	+	4
75	orf19.4988	orf19.4988	+	+	4
80	orf19.5358	orf19.5358	+	+	4
81	orf19.5389	FKH2	+	+	4
116	orf19.7060	orf19.7060	+		4
2	orf19.1223	DBF2	+		3
6	orf19.1451	SRB9	+		3
33	orf19.3091	orf19.3091	+		3
84	orf19.5518	orf19.5518	+	+	3
95	orf19.6155	orf19.6155	+		3
99	orf19.6291	orf19.6291	+		3
108	orf19.658	GIN1	+	+	3
7	orf19.147	YAK1	+		2
28	orf19.2826	orf19.2826	+	+	2
31	orf19.3000	ORC1	+	+	2
38	orf19.3289	orf19.3289	+		2
76	orf19.5166	DBF4	+	+	2
77	orf19.520	orf19.520	+		2
87	orf19.580	orf19.580	+		2
92	orf19.6030	orf19.6030	+		2
109	orf19.6583	orf19.6583	+	+	2
111	orf19.6610	orf19.6610	+		2
125	orf19.926	EXO1	+		2
11	orf19.1609	orf19.1609		+	1
24	orf19.267	orf19.267	+	+	1
27	orf19.272	FAA21	+		1
30	orf19.2909	ERG26	+		1
32	orf19.3040	EHT1	+		1
36	orf19.3240	ERG27	+		1
37	orf19.3252	DAL81	+		1
39	orf19.3296	orf19.3296	+		1
41	orf19.3356	ESP1	+		1
43	orf19.3474	IPL1		+	1
55	orf19.384	orf19.384	+		1
62	orf19.4101	orf19.4101	+		1
63	orf19.4192	CDC14	+	+	1
64	orf19.4208	RAD52	+	+	1
66	orf19.427	orf19.427	+	+	1
69	orf19.4435	orf19.4435	+	+	1
73	orf19.4777	DAK2	+		1
78	orf19.5246	orf19.5246	+		1
97	orf19.6254	ANT1	+		1
101	orf19.6385	ACO1	+		1
102	orf19.6408	orf19.6408		+	1
120	orf19.7406	orf19.7406	+		1
122	orf19.7663	orf19.7663	+		1
0	orf19.1108	HAM1		+	0
3	orf19.1357	FCY21	+		0
4	orf19.1428	DUO1	+	+	0
5	orf19.1446	CLB2	+		0
8	orf19.1515	CHT4	+	+	0
9	orf19.1570	ERG7	+		0
10	orf19.1598	ERG24	+		0
12	orf19.1618	GFA1	+		0
13	orf19.1631	ERG6	+		0
14	orf19.1792	orf19.1792	+		0
15	orf19.1801	CBR1	+		0
16	orf19.1941	NUF2	+		0
18	orf19.2369	orf19.2369	+		0
19	orf19.2381	orf19.2381	+	+	0
21	orf19.2397	orf19.2397	+		0
22	orf19.2400	orf19.2400	+		0
23	orf19.2416	MLC1	+		0
25	orf19.2672	NCP1	+		0
29	orf19.2827	orf19.2827	+	+	0
34	orf19.3221	CPA2	+		0
35	orf19.3231	CDC27	+		0
40	orf19.3311	IFD3	+		0
44	orf19.3477	orf19.3477	+		0
45	orf19.3507	MCR1	+		0
46	orf19.3535	orf19.3535	+		0
47	orf19.3551	DAD2	+	+	0
48	orf19.3561	CDC7	+	+	0
49	orf19.3684	orf19.3684	+		0
50	orf19.3707	YHB1	+		0
51	orf19.3733	IDP2	+		0
52	orf19.3788	SPC34	+	+	0
53	orf19.3809	BAS1	+		0
56	orf19.3856	CDC28	+		0
57	orf19.3871	DAD3	+		0
58	orf19.3954	orf19.3954	+		0
59	orf19.4013	orf19.4013	+		0
60	orf19.4043	orf19.4043	+		0
61	orf19.406	ERG1	+		0
65	orf19.4221	ORC4	+	+	0
68	orf19.4311	YNK1	+		0
70	orf19.4473	SPC19	+	+	0
72	orf19.4716	GDH3	+		0
74	orf19.4837	DAM1	+	+	0
79	orf19.5276	orf19.5276	+		0
82	orf19.5437	RHR2	+		0
83	orf19.5491	orf19.5491	+	+	0
86	orf19.5614	orf19.5614		+	0
88	orf19.5825	NCB2		+	0
89	orf19.6010	CDC5	+	+	0
90	orf19.6011	SIN3	+		0
91	orf19.6026	ERG2	+		0
96	orf19.6234	orf19.6234		+	0
98	orf19.6257	GLT1	+		0
100	orf19.638	FDH1	+		0
104	orf19.6443	orf19.6443	+		0
105	orf19.6496	TRS33	+		0
110	orf19.6596	orf19.6596	+		0
112	orf19.6837	FMA1	+		0
113	orf19.6868	orf19.6868	+		0
114	orf19.6882	OSM1	+		0
115	orf19.6942	ORC3	+	+	0
117	orf19.7185	orf19.7185	+		0
118	orf19.7288	orf19.7288	+		0
119	orf19.7306	orf19.7306	+		0
121	orf19.7469	ARG1	+		0
123	orf19.771	LPG20	+		0
124	orf19.826	orf19.826	+		0
42	orf19.3362;orf19.2671	orf19.3362	+
